# Supplementary material
Source: publisher figshare collection journal article supplement (https://gsajournals.figshare.com/ndownloader/files/20569473)
Supplement: Supplementary file 1 [file 20569473]

## Sheet: Table S1
Cross	Week	Vial Number	Average
O1♀*O1♂	1	1	26.6667
O1♀*O1♂	1	2	12.3333
O1♀*O1♂	1	3	15
O1♀*O1♂	1	4	11.3333
O1♀*O1♂	1	5	11.3333
O1♀*O1♂	1	6	11.3333
O1♀*O1♂	1	7	10.3333
O1♀*O1♂	1	8	6.66667
O1♀*O1♂	1	9	23.3333
O1♀*O1♂	1	10	23.6667
O1♀*O1♂	1	11	12.6667
O1♀*O1♂	1	12	18
O1♀*O1♂	1	13	10.3333
O1♀*O1♂	1	14	20.3333
O1♀*O1♂	1	15	17.6667
B1♀*O1♂	1	1	19
B1♀*O1♂	1	2	24
B1♀*O1♂	1	3	7.33333
B1♀*O1♂	1	4	10
B1♀*O1♂	1	5	9.33333
B1♀*O1♂	1	6	19
B1♀*O1♂	1	7	20.6667
B1♀*O1♂	1	8	17.3333
B1♀*O1♂	1	9	17.3333
B1♀*O1♂	1	10	19.3333
B1♀*O1♂	1	11	15.3333
B1♀*O1♂	1	12	14.6667
B1♀*O1♂	1	13	22
B1♀*O1♂	1	14	12.6667
B1♀*O1♂	1	15	12.3333
O1♀*B1♂	1	1	23
O1♀*B1♂	1	2	0
O1♀*B1♂	1	3	16.3333
O1♀*B1♂	1	4	21.6667
O1♀*B1♂	1	5	17
O1♀*B1♂	1	6	12
O1♀*B1♂	1	7	12.6667
O1♀*B1♂	1	8	18
O1♀*B1♂	1	9	20
O1♀*B1♂	1	10	13
O1♀*B1♂	1	11	18.6667
O1♀*B1♂	1	12	13.6667
O1♀*B1♂	1	13	18.6667
O1♀*B1♂	1	14	5.66667
O1♀*B1♂	1	15	17.3333
B1♀*B1♂	1	1	13.6667
B1♀*B1♂	1	2	20.3333
B1♀*B1♂	1	3	18
B1♀*B1♂	1	4	14.6667
B1♀*B1♂	1	5	17.6667
B1♀*B1♂	1	6	23.3333
B1♀*B1♂	1	7	15.3333
B1♀*B1♂	1	8	12.3333
B1♀*B1♂	1	9	19
B1♀*B1♂	1	10	11.3333
B1♀*B1♂	1	11	14.3333
B1♀*B1♂	1	12	9
B1♀*B1♂	1	13	22.5
B1♀*B1♂	1	14	4.5
B1♀*B1♂	1	15	16
O2♀*O2♂	1	1	14.6667
O2♀*O2♂	1	2	13.6667
O2♀*O2♂	1	3	9.33333
O2♀*O2♂	1	4	9.66667
O2♀*O2♂	1	5	12.6667
O2♀*O2♂	1	6	13.6667
O2♀*O2♂	1	7	10.3333
O2♀*O2♂	1	8	13.3333
O2♀*O2♂	1	9	15.5
O2♀*O2♂	1	10	10.3333
O2♀*O2♂	1	11	7
O2♀*O2♂	1	12	14.6667
O2♀*O2♂	1	13	13
O2♀*O2♂	1	14	14
O2♀*O2♂	1	15	13.6667
B2♀*O2♂	1	1	19.6667
B2♀*O2♂	1	2	14.6667
B2♀*O2♂	1	3	18.6667
B2♀*O2♂	1	4	13.6667
B2♀*O2♂	1	5	16
B2♀*O2♂	1	6	24
B2♀*O2♂	1	7	16.6667
B2♀*O2♂	1	8	11.3333
B2♀*O2♂	1	9	15.3333
B2♀*O2♂	1	10	13.3333
B2♀*O2♂	1	11	13.3333
B2♀*O2♂	1	12	16
B2♀*O2♂	1	13	13
B2♀*O2♂	1	14	13.3333
B2♀*O2♂	1	15	12.6667
O2♀*B2♂	1	1	13.3333
O2♀*B2♂	1	2	17
O2♀*B2♂	1	3	12
O2♀*B2♂	1	4	14.6667
O2♀*B2♂	1	5	12.6667
O2♀*B2♂	1	6	8.66667
O2♀*B2♂	1	7	2.66667
O2♀*B2♂	1	8	15.3333
O2♀*B2♂	1	9	10.6667
O2♀*B2♂	1	10	10.6667
O2♀*B2♂	1	11	9.66667
O2♀*B2♂	1	12	4.33333
O2♀*B2♂	1	13	14.3333
O2♀*B2♂	1	14	18.6667
O2♀*B2♂	1	15	32.5
B2♀*B2♂	1	1	14.6667
B2♀*B2♂	1	2	17
B2♀*B2♂	1	3	9.66667
B2♀*B2♂	1	4	8.33333
B2♀*B2♂	1	5	9.66667
B2♀*B2♂	1	6	10
B2♀*B2♂	1	7	22
B2♀*B2♂	1	8	17.6667
B2♀*B2♂	1	9	19
B2♀*B2♂	1	10	14
B2♀*B2♂	1	11	11
B2♀*B2♂	1	12	6.33333
B2♀*B2♂	1	13	16
B2♀*B2♂	1	14	9
B2♀*B2♂	1	15	11.6667
O3♀*O3♂	1	1	11
O3♀*O3♂	1	2	9.66667
O3♀*O3♂	1	3	9.66667
O3♀*O3♂	1	4	5.33333
O3♀*O3♂	1	5	12.6667
O3♀*O3♂	1	6	14.6667
O3♀*O3♂	1	7	17
O3♀*O3♂	1	8	16.6667
O3♀*O3♂	1	9	14.3333
O3♀*O3♂	1	10	9.66667
O3♀*O3♂	1	11	15
O3♀*O3♂	1	12	7.33333
O3♀*O3♂	1	13	12.3333
O3♀*O3♂	1	14	14
O3♀*O3♂	1	15	7.33333
B3♀*O3♂	1	1	16
B3♀*O3♂	1	2	19.3333
B3♀*O3♂	1	3	15
B3♀*O3♂	1	4	21.3333
B3♀*O3♂	1	5	12
B3♀*O3♂	1	6	13
B3♀*O3♂	1	7	18.3333
B3♀*O3♂	1	8	27.3333
B3♀*O3♂	1	9	11.6667
B3♀*O3♂	1	10	30
B3♀*O3♂	1	11	0
B3♀*O3♂	1	12	11.3333
B3♀*O3♂	1	13	9.33333
B3♀*O3♂	1	14	20.3333
B3♀*O3♂	1	15	17.6667
O3♀*B3♂	1	1	7
O3♀*B3♂	1	2	14.3333
O3♀*B3♂	1	3	17.6667
O3♀*B3♂	1	4	0
O3♀*B3♂	1	5	21.3333
O3♀*B3♂	1	6	17.3333
O3♀*B3♂	1	7	22.3333
O3♀*B3♂	1	8	0
O3♀*B3♂	1	9	15.3333
O3♀*B3♂	1	10	14
O3♀*B3♂	1	11	12.3333
O3♀*B3♂	1	12	21.3333
O3♀*B3♂	1	13	14.3333
O3♀*B3♂	1	14	13.3333
O3♀*B3♂	1	15	19
B3♀*B3♂	1	1	15.6667
B3♀*B3♂	1	2	25
B3♀*B3♂	1	3	16.3333
B3♀*B3♂	1	4	21.3333
B3♀*B3♂	1	5	19.3333
B3♀*B3♂	1	6	19.3333
B3♀*B3♂	1	7	13.6667
B3♀*B3♂	1	8	21.3333
B3♀*B3♂	1	9	31.3333
B3♀*B3♂	1	10	25
B3♀*B3♂	1	11	17
B3♀*B3♂	1	12	11
B3♀*B3♂	1	13	9.66667
B3♀*B3♂	1	14	14.3333
B3♀*B3♂	1	15	27
O4♀*O4♂	1	1	14.5
O4♀*O4♂	1	2	16
O4♀*O4♂	1	3	17
O4♀*O4♂	1	4	9.33333
O4♀*O4♂	1	5	12.3333
O4♀*O4♂	1	6	10
O4♀*O4♂	1	7	27.3333
O4♀*O4♂	1	8	11
O4♀*O4♂	1	9	10.6667
O4♀*O4♂	1	10	20.6667
O4♀*O4♂	1	11	18.3333
O4♀*O4♂	1	12	17
O4♀*O4♂	1	13	16.3333
O4♀*O4♂	1	14	13.3333
O4♀*O4♂	1	15	17.6667
B4♀*O4♂	1	1	19
B4♀*O4♂	1	2	15.6667
B4♀*O4♂	1	3	18
B4♀*O4♂	1	4	13.3333
B4♀*O4♂	1	5	20.6667
B4♀*O4♂	1	6	21.6667
B4♀*O4♂	1	7	10.3333
B4♀*O4♂	1	8	8.33333
B4♀*O4♂	1	9	16
B4♀*O4♂	1	10	13.6667
B4♀*O4♂	1	11	10.6667
B4♀*O4♂	1	12	19
B4♀*O4♂	1	13	13.6667
B4♀*O4♂	1	14	9
B4♀*O4♂	1	15	17.6667
O4♀*B4♂	1	1	28.3333
O4♀*B4♂	1	2	22.6667
O4♀*B4♂	1	3	21.6667
O4♀*B4♂	1	4	27.6667
O4♀*B4♂	1	5	12
O4♀*B4♂	1	6	23.6667
O4♀*B4♂	1	7	9
O4♀*B4♂	1	8	13.3333
O4♀*B4♂	1	9	24.6667
O4♀*B4♂	1	10	31.3333
O4♀*B4♂	1	11	25.6667
O4♀*B4♂	1	12	8
O4♀*B4♂	1	13	24.6667
O4♀*B4♂	1	14	18.3333
O4♀*B4♂	1	15	13.6667
B4♀*B4♂	1	1	11.6667
B4♀*B4♂	1	2	16.6667
B4♀*B4♂	1	3	15.6667
B4♀*B4♂	1	4	14.3333
B4♀*B4♂	1	5	12.6667
B4♀*B4♂	1	6	0
B4♀*B4♂	1	7	10.6667
B4♀*B4♂	1	8	10.3333
B4♀*B4♂	1	9	10.6667
B4♀*B4♂	1	10	12.6667
B4♀*B4♂	1	11	9.66667
B4♀*B4♂	1	12	9.66667
B4♀*B4♂	1	13	15.3333
B4♀*B4♂	1	14	14.6667
B4♀*B4♂	1	15	10
O5♀*O5♂	1	1	19.3333
O5♀*O5♂	1	2	20.6667
O5♀*O5♂	1	3	5.33333
O5♀*O5♂	1	4	18.3333
O5♀*O5♂	1	5	19.6667
O5♀*O5♂	1	6	15
O5♀*O5♂	1	7	16.6667
O5♀*O5♂	1	8	21
O5♀*O5♂	1	9	14.3333
O5♀*O5♂	1	10	13.6667
O5♀*O5♂	1	11	17
O5♀*O5♂	1	12	17.3333
O5♀*O5♂	1	13	9
O5♀*O5♂	1	14	10
O5♀*O5♂	1	15	13.6667
B5♀*O5♂	1	1	18.6667
B5♀*O5♂	1	2	18
B5♀*O5♂	1	3	17
B5♀*O5♂	1	4	19
B5♀*O5♂	1	5	10.3333
B5♀*O5♂	1	6	20
B5♀*O5♂	1	7	21
B5♀*O5♂	1	8	23
B5♀*O5♂	1	9	9.66667
B5♀*O5♂	1	10	18
B5♀*O5♂	1	11	26
B5♀*O5♂	1	12	16
B5♀*O5♂	1	13	19
B5♀*O5♂	1	14	0
B5♀*O5♂	1	15	25.3333
O5♀*B5♂	1	1	15.3333
O5♀*B5♂	1	2	31
O5♀*B5♂	1	3	23.6667
O5♀*B5♂	1	4	25
O5♀*B5♂	1	5	9
O5♀*B5♂	1	6	29
O5♀*B5♂	1	7	21
O5♀*B5♂	1	8	20
O5♀*B5♂	1	9	19.6667
O5♀*B5♂	1	10	0
O5♀*B5♂	1	11	17
O5♀*B5♂	1	12	14.6667
O5♀*B5♂	1	13	27.6667
O5♀*B5♂	1	14	28.3333
O5♀*B5♂	1	15	17.6667
B5♀*B5♂	1	1	9
B5♀*B5♂	1	2	17.3333
B5♀*B5♂	1	3	16.3333
B5♀*B5♂	1	4	23.3333
B5♀*B5♂	1	5	8.33333
B5♀*B5♂	1	6	12.6667
B5♀*B5♂	1	7	14
B5♀*B5♂	1	8	18.3333
B5♀*B5♂	1	9	12.6667
B5♀*B5♂	1	10	17.6667
B5♀*B5♂	1	11	6
B5♀*B5♂	1	12	13
B5♀*B5♂	1	13	10.3333
B5♀*B5♂	1	14	0
B5♀*B5♂	1	15	17.3333
O1♀*O1♂	2	1	10.6667
O1♀*O1♂	2	2	22
O1♀*O1♂	2	3	25
O1♀*O1♂	2	4	23.6667
O1♀*O1♂	2	5	20
O1♀*O1♂	2	6	12
O1♀*O1♂	2	7	16.6667
O1♀*O1♂	2	8	15
O1♀*O1♂	2	9	22.3333
O1♀*O1♂	2	10	17.6667
O1♀*O1♂	2	11	18.6667
O1♀*O1♂	2	12	16.6667
O1♀*O1♂	2	13	15
O1♀*O1♂	2	14	22.3333
O1♀*O1♂	2	15	24.3333
B1♀*O1♂	2	1	14.5
B1♀*O1♂	2	2	21.3333
B1♀*O1♂	2	3	5.66667
B1♀*O1♂	2	4	0
B1♀*O1♂	2	5	13
B1♀*O1♂	2	6	20
B1♀*O1♂	2	7	24.5
B1♀*O1♂	2	8	25
B1♀*O1♂	2	9	18.6667
B1♀*O1♂	2	10	5
B1♀*O1♂	2	11	10.6667
B1♀*O1♂	2	12	7.33333
B1♀*O1♂	2	13	24
B1♀*O1♂	2	14	12
B1♀*O1♂	2	15	5.66667
O1♀*B1♂	2	1	19.6667
O1♀*B1♂	2	2	N/A
O1♀*B1♂	2	3	7.66667
O1♀*B1♂	2	4	30.5
O1♀*B1♂	2	5	15
O1♀*B1♂	2	6	8.33333
O1♀*B1♂	2	7	15.6667
O1♀*B1♂	2	8	24.3333
O1♀*B1♂	2	9	29
O1♀*B1♂	2	10	13
O1♀*B1♂	2	11	10.6667
O1♀*B1♂	2	12	14
O1♀*B1♂	2	13	22
O1♀*B1♂	2	14	20
O1♀*B1♂	2	15	21
B1♀*B1♂	2	1	6.33333
B1♀*B1♂	2	2	14.6667
B1♀*B1♂	2	3	19.6667
B1♀*B1♂	2	4	12.3333
B1♀*B1♂	2	5	8.33333
B1♀*B1♂	2	6	17
B1♀*B1♂	2	7	4.66667
B1♀*B1♂	2	8	15.5
B1♀*B1♂	2	9	12.3333
B1♀*B1♂	2	10	10.3333
B1♀*B1♂	2	11	12.6667
B1♀*B1♂	2	12	9.66667
B1♀*B1♂	2	13	N/A
B1♀*B1♂	2	14	N/A
B1♀*B1♂	2	15	7.33333
O2♀*O2♂	2	1	17
O2♀*O2♂	2	2	5.66667
O2♀*O2♂	2	3	10.3333
O2♀*O2♂	2	4	9.66667
O2♀*O2♂	2	5	15
O2♀*O2♂	2	6	12.3333
O2♀*O2♂	2	7	13.6667
O2♀*O2♂	2	8	17
O2♀*O2♂	2	9	18
O2♀*O2♂	2	10	13.6667
O2♀*O2♂	2	11	4.33333
O2♀*O2♂	2	12	6.33333
O2♀*O2♂	2	13	8.66667
O2♀*O2♂	2	14	17.5
O2♀*O2♂	2	15	11.6667
B2♀*O2♂	2	1	8.33333
B2♀*O2♂	2	2	42
B2♀*O2♂	2	3	19.3333
B2♀*O2♂	2	4	6.66667
B2♀*O2♂	2	5	10.6667
B2♀*O2♂	2	6	17
B2♀*O2♂	2	7	21
B2♀*O2♂	2	8	9.5
B2♀*O2♂	2	9	12
B2♀*O2♂	2	10	8
B2♀*O2♂	2	11	18
B2♀*O2♂	2	12	14
B2♀*O2♂	2	13	5.33333
B2♀*O2♂	2	14	16.3333
B2♀*O2♂	2	15	7.33333
O2♀*B2♂	2	1	11.6667
O2♀*B2♂	2	2	13.3333
O2♀*B2♂	2	3	5.66667
O2♀*B2♂	2	4	14
O2♀*B2♂	2	5	17.6667
O2♀*B2♂	2	6	24
O2♀*B2♂	2	7	22
O2♀*B2♂	2	8	13.6667
O2♀*B2♂	2	9	4.33333
O2♀*B2♂	2	10	5
O2♀*B2♂	2	11	9.66667
O2♀*B2♂	2	12	18.5
O2♀*B2♂	2	13	6
O2♀*B2♂	2	14	0
O2♀*B2♂	2	15	11
B2♀*B2♂	2	1	14.6667
B2♀*B2♂	2	2	18.6667
B2♀*B2♂	2	3	4
B2♀*B2♂	2	4	5.5
B2♀*B2♂	2	5	10.3333
B2♀*B2♂	2	6	9.33333
B2♀*B2♂	2	7	9.66667
B2♀*B2♂	2	8	15
B2♀*B2♂	2	9	23
B2♀*B2♂	2	10	14.6667
B2♀*B2♂	2	11	7
B2♀*B2♂	2	12	6.66667
B2♀*B2♂	2	13	15
B2♀*B2♂	2	14	12.3333
B2♀*B2♂	2	15	20.5
O3♀*O3♂	2	1	13.3333
O3♀*O3♂	2	2	16
O3♀*O3♂	2	3	15.6667
O3♀*O3♂	2	4	18
O3♀*O3♂	2	5	18.6667
O3♀*O3♂	2	6	17
O3♀*O3♂	2	7	21.6667
O3♀*O3♂	2	8	18.6667
O3♀*O3♂	2	9	11.6667
O3♀*O3♂	2	10	15.6667
O3♀*O3♂	2	11	21
O3♀*O3♂	2	12	7.33333
O3♀*O3♂	2	13	17.6667
O3♀*O3♂	2	14	16.5
O3♀*O3♂	2	15	10.6667
B3♀*O3♂	2	1	23.6667
B3♀*O3♂	2	2	18
B3♀*O3♂	2	3	26
B3♀*O3♂	2	4	31
B3♀*O3♂	2	5	20
B3♀*O3♂	2	6	13.3333
B3♀*O3♂	2	7	24
B3♀*O3♂	2	8	34.6667
B3♀*O3♂	2	9	11.3333
B3♀*O3♂	2	10	0
B3♀*O3♂	2	11	N/A
B3♀*O3♂	2	12	24
B3♀*O3♂	2	13	15
B3♀*O3♂	2	14	25.5
B3♀*O3♂	2	15	26
O3♀*B3♂	2	1	3.33333
O3♀*B3♂	2	2	35
O3♀*B3♂	2	3	15.3333
O3♀*B3♂	2	4	N/A
O3♀*B3♂	2	5	28
O3♀*B3♂	2	6	19.6667
O3♀*B3♂	2	7	21.6667
O3♀*B3♂	2	8	N/A
O3♀*B3♂	2	9	18.6667
O3♀*B3♂	2	10	16.6667
O3♀*B3♂	2	11	17
O3♀*B3♂	2	12	14.3333
O3♀*B3♂	2	13	16
O3♀*B3♂	2	14	23.3333
O3♀*B3♂	2	15	10.6667
B3♀*B3♂	2	1	26.3333
B3♀*B3♂	2	2	18.3333
B3♀*B3♂	2	3	20.3333
B3♀*B3♂	2	4	28
B3♀*B3♂	2	5	29
B3♀*B3♂	2	6	7.66667
B3♀*B3♂	2	7	13
B3♀*B3♂	2	8	16
B3♀*B3♂	2	9	31.3333
B3♀*B3♂	2	10	30
B3♀*B3♂	2	11	43.5
B3♀*B3♂	2	12	17.6667
B3♀*B3♂	2	13	9.66667
B3♀*B3♂	2	14	7
B3♀*B3♂	2	15	28
O4♀*O4♂	2	1	11.5
O4♀*O4♂	2	2	11
O4♀*O4♂	2	3	14.3333
O4♀*O4♂	2	4	12
O4♀*O4♂	2	5	20.6667
O4♀*O4♂	2	6	19.6667
O4♀*O4♂	2	7	25.6667
O4♀*O4♂	2	8	9.66667
O4♀*O4♂	2	9	7
O4♀*O4♂	2	10	23
O4♀*O4♂	2	11	13.6667
O4♀*O4♂	2	12	16.3333
O4♀*O4♂	2	13	13.6667
O4♀*O4♂	2	14	9.66667
O4♀*O4♂	2	15	9.33333
B4♀*O4♂	2	1	13.6667
B4♀*O4♂	2	2	10
B4♀*O4♂	2	3	8
B4♀*O4♂	2	4	5.66667
B4♀*O4♂	2	5	21.3333
B4♀*O4♂	2	6	15.5
B4♀*O4♂	2	7	7
B4♀*O4♂	2	8	7
B4♀*O4♂	2	9	4.33333
B4♀*O4♂	2	10	12.6667
B4♀*O4♂	2	11	5.33333
B4♀*O4♂	2	12	20.6667
B4♀*O4♂	2	13	17
B4♀*O4♂	2	14	11
B4♀*O4♂	2	15	12.3333
O4♀*B4♂	2	1	6
O4♀*B4♂	2	2	11.3333
O4♀*B4♂	2	3	17.6667
O4♀*B4♂	2	4	18.3333
O4♀*B4♂	2	5	7.33333
O4♀*B4♂	2	6	18.3333
O4♀*B4♂	2	7	15
O4♀*B4♂	2	8	22.3333
O4♀*B4♂	2	9	26.3333
O4♀*B4♂	2	10	12.3333
O4♀*B4♂	2	11	14.6667
O4♀*B4♂	2	12	13.6667
O4♀*B4♂	2	13	25
O4♀*B4♂	2	14	33
O4♀*B4♂	2	15	23
B4♀*B4♂	2	1	11.6667
B4♀*B4♂	2	2	14.3333
B4♀*B4♂	2	3	4
B4♀*B4♂	2	4	5.5
B4♀*B4♂	2	5	6
B4♀*B4♂	2	6	N/A
B4♀*B4♂	2	7	14.3333
B4♀*B4♂	2	8	12
B4♀*B4♂	2	9	13
B4♀*B4♂	2	10	9.5
B4♀*B4♂	2	11	11
B4♀*B4♂	2	12	6.66667
B4♀*B4♂	2	13	19
B4♀*B4♂	2	14	14.3333
B4♀*B4♂	2	15	9.33333
O5♀*O5♂	2	1	19.6667
O5♀*O5♂	2	2	29.3333
O5♀*O5♂	2	3	25.3333
O5♀*O5♂	2	4	24
O5♀*O5♂	2	5	28.3333
O5♀*O5♂	2	6	30
O5♀*O5♂	2	7	25.6667
O5♀*O5♂	2	8	24.3333
O5♀*O5♂	2	9	23.3333
O5♀*O5♂	2	10	25.6667
O5♀*O5♂	2	11	25
O5♀*O5♂	2	12	20
O5♀*O5♂	2	13	18.6667
O5♀*O5♂	2	14	17
O5♀*O5♂	2	15	18.6667
B5♀*O5♂	2	1	28.5
B5♀*O5♂	2	2	25
B5♀*O5♂	2	3	10.5
B5♀*O5♂	2	4	29.5
B5♀*O5♂	2	5	19.3333
B5♀*O5♂	2	6	25.5
B5♀*O5♂	2	7	29.6667
B5♀*O5♂	2	8	19.3333
B5♀*O5♂	2	9	17.5
B5♀*O5♂	2	10	22.6667
B5♀*O5♂	2	11	18
B5♀*O5♂	2	12	17.6667
B5♀*O5♂	2	13	18.6667
B5♀*O5♂	2	14	N/A
B5♀*O5♂	2	15	27
O5♀*B5♂	2	1	20
O5♀*B5♂	2	2	25.3333
O5♀*B5♂	2	3	24
O5♀*B5♂	2	4	43.5
O5♀*B5♂	2	5	13.5
O5♀*B5♂	2	6	27.6667
O5♀*B5♂	2	7	21.3333
O5♀*B5♂	2	8	23.6667
O5♀*B5♂	2	9	21
O5♀*B5♂	2	10	N/A
O5♀*B5♂	2	11	27.3333
O5♀*B5♂	2	12	20.6667
O5♀*B5♂	2	13	19.3333
O5♀*B5♂	2	14	30.3333
O5♀*B5♂	2	15	14.6667
B5♀*B5♂	2	1	9.33333
B5♀*B5♂	2	2	14
B5♀*B5♂	2	3	20.3333
B5♀*B5♂	2	4	16
B5♀*B5♂	2	5	13.6667
B5♀*B5♂	2	6	12.6667
B5♀*B5♂	2	7	6.66667
B5♀*B5♂	2	8	17.3333
B5♀*B5♂	2	9	10.5
B5♀*B5♂	2	10	15.3333
B5♀*B5♂	2	11	10
B5♀*B5♂	2	12	16
B5♀*B5♂	2	13	12.6667
B5♀*B5♂	2	14	N/A
B5♀*B5♂	2	15	13
O1♀*O1♂	3	1	16
O1♀*O1♂	3	2	26
O1♀*O1♂	3	3	21
O1♀*O1♂	3	4	20
O1♀*O1♂	3	5	12
O1♀*O1♂	3	6	14
O1♀*O1♂	3	7	14.6667
O1♀*O1♂	3	8	11
O1♀*O1♂	3	9	33.6667
O1♀*O1♂	3	10	21
O1♀*O1♂	3	11	12
O1♀*O1♂	3	12	26.6667
O1♀*O1♂	3	13	16.3333
O1♀*O1♂	3	14	25
O1♀*O1♂	3	15	37.5
B1♀*O1♂	3	1	11
B1♀*O1♂	3	2	19.6667
B1♀*O1♂	3	3	11.5
B1♀*O1♂	3	4	0
B1♀*O1♂	3	5	7
B1♀*O1♂	3	6	N/A
B1♀*O1♂	3	7	23
B1♀*O1♂	3	8	12
B1♀*O1♂	3	9	11.5
B1♀*O1♂	3	10	0
B1♀*O1♂	3	11	13.6667
B1♀*O1♂	3	12	17.5
B1♀*O1♂	3	13	11
B1♀*O1♂	3	14	3.66667
B1♀*O1♂	3	15	5
O1♀*B1♂	3	1	25.6667
O1♀*B1♂	3	2	N/A
O1♀*B1♂	3	3	36.6667
O1♀*B1♂	3	4	40.5
O1♀*B1♂	3	5	18.3333
O1♀*B1♂	3	6	15.3333
O1♀*B1♂	3	7	20.6667
O1♀*B1♂	3	8	27.3333
O1♀*B1♂	3	9	29.6667
O1♀*B1♂	3	10	24
O1♀*B1♂	3	11	26.6667
O1♀*B1♂	3	12	10
O1♀*B1♂	3	13	23
O1♀*B1♂	3	14	38
O1♀*B1♂	3	15	38.5
B1♀*B1♂	3	1	17.5
B1♀*B1♂	3	2	19
B1♀*B1♂	3	3	35
B1♀*B1♂	3	4	26
B1♀*B1♂	3	5	16.3333
B1♀*B1♂	3	6	0
B1♀*B1♂	3	7	1.66667
B1♀*B1♂	3	8	8
B1♀*B1♂	3	9	7.5
B1♀*B1♂	3	10	9.33333
B1♀*B1♂	3	11	16.6667
B1♀*B1♂	3	12	15
B1♀*B1♂	3	13	N/A
B1♀*B1♂	3	14	N/A
B1♀*B1♂	3	15	6
O2♀*O2♂	3	1	14
O2♀*O2♂	3	2	26.3333
O2♀*O2♂	3	3	10.3333
O2♀*O2♂	3	4	8.66667
O2♀*O2♂	3	5	19.5
O2♀*O2♂	3	6	16.6667
O2♀*O2♂	3	7	15
O2♀*O2♂	3	8	14.6667
O2♀*O2♂	3	9	23
O2♀*O2♂	3	10	17
O2♀*O2♂	3	11	4
O2♀*O2♂	3	12	3.66667
O2♀*O2♂	3	13	27
O2♀*O2♂	3	14	15.5
O2♀*O2♂	3	15	6.66667
B2♀*O2♂	3	1	3.66667
B2♀*O2♂	3	2	6
B2♀*O2♂	3	3	25
B2♀*O2♂	3	4	17.3333
B2♀*O2♂	3	5	10.6667
B2♀*O2♂	3	6	18
B2♀*O2♂	3	7	9.5
B2♀*O2♂	3	8	5
B2♀*O2♂	3	9	43
B2♀*O2♂	3	10	8.5
B2♀*O2♂	3	11	0
B2♀*O2♂	3	12	32
B2♀*O2♂	3	13	43
B2♀*O2♂	3	14	18.3333
B2♀*O2♂	3	15	9
O2♀*B2♂	3	1	21.6667
O2♀*B2♂	3	2	14.3333
O2♀*B2♂	3	3	1.33333
O2♀*B2♂	3	4	20.3333
O2♀*B2♂	3	5	11.3333
O2♀*B2♂	3	6	33.3333
O2♀*B2♂	3	7	0
O2♀*B2♂	3	8	21.3333
O2♀*B2♂	3	9	21.3333
O2♀*B2♂	3	10	22.5
O2♀*B2♂	3	11	13.3333
O2♀*B2♂	3	12	25
O2♀*B2♂	3	13	22.6667
O2♀*B2♂	3	14	26
O2♀*B2♂	3	15	31.5
B2♀*B2♂	3	1	12
B2♀*B2♂	3	2	8
B2♀*B2♂	3	3	1.66667
B2♀*B2♂	3	4	19
B2♀*B2♂	3	5	7.66667
B2♀*B2♂	3	6	11.6667
B2♀*B2♂	3	7	20.3333
B2♀*B2♂	3	8	17
B2♀*B2♂	3	9	19.3333
B2♀*B2♂	3	10	17.6667
B2♀*B2♂	3	11	4.5
B2♀*B2♂	3	12	7
B2♀*B2♂	3	13	12.6667
B2♀*B2♂	3	14	0
B2♀*B2♂	3	15	25.5
O3♀*O3♂	3	1	20.6667
O3♀*O3♂	3	2	20
O3♀*O3♂	3	3	17.3333
O3♀*O3♂	3	4	29
O3♀*O3♂	3	5	27.3333
O3♀*O3♂	3	6	18.6667
O3♀*O3♂	3	7	21.3333
O3♀*O3♂	3	8	20.6667
O3♀*O3♂	3	9	13.6667
O3♀*O3♂	3	10	16
O3♀*O3♂	3	11	10.5
O3♀*O3♂	3	12	11.6667
O3♀*O3♂	3	13	15.6667
O3♀*O3♂	3	14	15
O3♀*O3♂	3	15	10.3333
B3♀*O3♂	3	1	22.6667
B3♀*O3♂	3	2	20.3333
B3♀*O3♂	3	3	32
B3♀*O3♂	3	4	25
B3♀*O3♂	3	5	22.3333
B3♀*O3♂	3	6	18.6667
B3♀*O3♂	3	7	31
B3♀*O3♂	3	8	27.6667
B3♀*O3♂	3	9	32
B3♀*O3♂	3	10	28
B3♀*O3♂	3	11	N/A
B3♀*O3♂	3	12	27.6667
B3♀*O3♂	3	13	15.5
B3♀*O3♂	3	14	30.5
B3♀*O3♂	3	15	40.5
O3♀*B3♂	3	1	8.33333
O3♀*B3♂	3	2	32
O3♀*B3♂	3	3	28
O3♀*B3♂	3	4	N/A
O3♀*B3♂	3	5	45
O3♀*B3♂	3	6	16.6667
O3♀*B3♂	3	7	26
O3♀*B3♂	3	8	N/A
O3♀*B3♂	3	9	6.33333
O3♀*B3♂	3	10	17.6667
O3♀*B3♂	3	11	17.3333
O3♀*B3♂	3	12	25
O3♀*B3♂	3	13	12
O3♀*B3♂	3	14	30
O3♀*B3♂	3	15	22.6667
B3♀*B3♂	3	1	15.6667
B3♀*B3♂	3	2	21.3333
B3♀*B3♂	3	3	39.3333
B3♀*B3♂	3	4	43.5
B3♀*B3♂	3	5	0
B3♀*B3♂	3	6	36.6667
B3♀*B3♂	3	7	11.6667
B3♀*B3♂	3	8	12.3333
B3♀*B3♂	3	9	42
B3♀*B3♂	3	10	9
B3♀*B3♂	3	11	34.5
B3♀*B3♂	3	12	38.6667
B3♀*B3♂	3	13	10.6667
B3♀*B3♂	3	14	8
B3♀*B3♂	3	15	48
O4♀*O4♂	3	1	15
O4♀*O4♂	3	2	9
O4♀*O4♂	3	3	19
O4♀*O4♂	3	4	16
O4♀*O4♂	3	5	14.6667
O4♀*O4♂	3	6	21
O4♀*O4♂	3	7	36
O4♀*O4♂	3	8	16
O4♀*O4♂	3	9	10.6667
O4♀*O4♂	3	10	38.3333
O4♀*O4♂	3	11	19.6667
O4♀*O4♂	3	12	16
O4♀*O4♂	3	13	15
O4♀*O4♂	3	14	13.3333
O4♀*O4♂	3	15	31.6667
B4♀*O4♂	3	1	14.6667
B4♀*O4♂	3	2	6
B4♀*O4♂	3	3	11.3333
B4♀*O4♂	3	4	1.33333
B4♀*O4♂	3	5	15
B4♀*O4♂	3	6	N/A
B4♀*O4♂	3	7	3
B4♀*O4♂	3	8	5.5
B4♀*O4♂	3	9	12
B4♀*O4♂	3	10	18
B4♀*O4♂	3	11	21
B4♀*O4♂	3	12	11.3333
B4♀*O4♂	3	13	8.66667
B4♀*O4♂	3	14	4
B4♀*O4♂	3	15	8
O4♀*B4♂	3	1	5.66667
O4♀*B4♂	3	2	30
O4♀*B4♂	3	3	28.3333
O4♀*B4♂	3	4	22
O4♀*B4♂	3	5	14
O4♀*B4♂	3	6	31.3333
O4♀*B4♂	3	7	6
O4♀*B4♂	3	8	37.3333
O4♀*B4♂	3	9	32
O4♀*B4♂	3	10	12.6667
O4♀*B4♂	3	11	23.6667
O4♀*B4♂	3	12	18.3333
O4♀*B4♂	3	13	29.6667
O4♀*B4♂	3	14	38
O4♀*B4♂	3	15	21
B4♀*B4♂	3	1	13.6667
B4♀*B4♂	3	2	23
B4♀*B4♂	3	3	5
B4♀*B4♂	3	4	1.5
B4♀*B4♂	3	5	3.66667
B4♀*B4♂	3	6	N/A
B4♀*B4♂	3	7	11
B4♀*B4♂	3	8	17
B4♀*B4♂	3	9	23.5
B4♀*B4♂	3	10	25.5
B4♀*B4♂	3	11	10
B4♀*B4♂	3	12	4
B4♀*B4♂	3	13	16.5
B4♀*B4♂	3	14	24.3333
B4♀*B4♂	3	15	24
O5♀*O5♂	3	1	30
O5♀*O5♂	3	2	38.3333
O5♀*O5♂	3	3	33.6667
O5♀*O5♂	3	4	30.6667
O5♀*O5♂	3	5	44.6667
O5♀*O5♂	3	6	28
O5♀*O5♂	3	7	30.6667
O5♀*O5♂	3	8	43
O5♀*O5♂	3	9	17
O5♀*O5♂	3	10	30
O5♀*O5♂	3	11	21.5
O5♀*O5♂	3	12	30.3333
O5♀*O5♂	3	13	17.3333
O5♀*O5♂	3	14	12.5
O5♀*O5♂	3	15	21.6667
B5♀*O5♂	3	1	43
B5♀*O5♂	3	2	28.3333
B5♀*O5♂	3	3	9.5
B5♀*O5♂	3	4	32
B5♀*O5♂	3	5	0
B5♀*O5♂	3	6	31.5
B5♀*O5♂	3	7	40
B5♀*O5♂	3	8	0
B5♀*O5♂	3	9	15
B5♀*O5♂	3	10	29.3333
B5♀*O5♂	3	11	11
B5♀*O5♂	3	12	16.5
B5♀*O5♂	3	13	25.3333
B5♀*O5♂	3	14	N/A
B5♀*O5♂	3	15	29.3333
O5♀*B5♂	3	1	32.6667
O5♀*B5♂	3	2	36.3333
O5♀*B5♂	3	3	43
O5♀*B5♂	3	4	42
O5♀*B5♂	3	5	5.5
O5♀*B5♂	3	6	39
O5♀*B5♂	3	7	27.6667
O5♀*B5♂	3	8	32.3333
O5♀*B5♂	3	9	25
O5♀*B5♂	3	10	N/A
O5♀*B5♂	3	11	33.3333
O5♀*B5♂	3	12	34.5
O5♀*B5♂	3	13	39.3333
O5♀*B5♂	3	14	36.6667
O5♀*B5♂	3	15	30
B5♀*B5♂	3	1	16.6667
B5♀*B5♂	3	2	22
B5♀*B5♂	3	3	25.3333
B5♀*B5♂	3	4	19
B5♀*B5♂	3	5	20.3333
B5♀*B5♂	3	6	25
B5♀*B5♂	3	7	19.3333
B5♀*B5♂	3	8	22
B5♀*B5♂	3	9	8
B5♀*B5♂	3	10	15.6667
B5♀*B5♂	3	11	16.3333
B5♀*B5♂	3	12	23.6667
B5♀*B5♂	3	13	20.3333
B5♀*B5♂	3	14	N/A
B5♀*B5♂	3	15	21.6667
O1♀*O1♂	4	1	13
O1♀*O1♂	4	2	35
O1♀*O1♂	4	3	18.3333
O1♀*O1♂	4	4	25
O1♀*O1♂	4	5	8.33333
O1♀*O1♂	4	6	23
O1♀*O1♂	4	7	16.3333
O1♀*O1♂	4	8	10.5
O1♀*O1♂	4	9	31.6667
O1♀*O1♂	4	10	24
O1♀*O1♂	4	11	22.3333
O1♀*O1♂	4	12	29.6667
O1♀*O1♂	4	13	12.3333
O1♀*O1♂	4	14	18.3333
O1♀*O1♂	4	15	22.5
B1♀*O1♂	4	1	7
B1♀*O1♂	4	2	3.33333
B1♀*O1♂	4	3	2
B1♀*O1♂	4	4	0
B1♀*O1♂	4	5	2
B1♀*O1♂	4	6	N/A
B1♀*O1♂	4	7	4
B1♀*O1♂	4	8	N/A
B1♀*O1♂	4	9	6
B1♀*O1♂	4	10	N/A
B1♀*O1♂	4	11	9.5
B1♀*O1♂	4	12	5.5
B1♀*O1♂	4	13	N/A
B1♀*O1♂	4	14	N/A
B1♀*O1♂	4	15	0
O1♀*B1♂	4	1	26
O1♀*B1♂	4	2	N/A
O1♀*B1♂	4	3	21.6667
O1♀*B1♂	4	4	29.5
O1♀*B1♂	4	5	19
O1♀*B1♂	4	6	12.3333
O1♀*B1♂	4	7	18
O1♀*B1♂	4	8	23.6667
O1♀*B1♂	4	9	24
O1♀*B1♂	4	10	18.3333
O1♀*B1♂	4	11	35
O1♀*B1♂	4	12	13
O1♀*B1♂	4	13	32.6667
O1♀*B1♂	4	14	33.6667
O1♀*B1♂	4	15	27.5
B1♀*B1♂	4	1	N/A
B1♀*B1♂	4	2	4.66667
B1♀*B1♂	4	3	12
B1♀*B1♂	4	4	13
B1♀*B1♂	4	5	7
B1♀*B1♂	4	6	0
B1♀*B1♂	4	7	0
B1♀*B1♂	4	8	1
B1♀*B1♂	4	9	17.5
B1♀*B1♂	4	10	5.66667
B1♀*B1♂	4	11	0
B1♀*B1♂	4	12	13.5
B1♀*B1♂	4	13	N/A
B1♀*B1♂	4	14	N/A
B1♀*B1♂	4	15	0
O2♀*O2♂	4	1	6.66667
O2♀*O2♂	4	2	4
O2♀*O2♂	4	3	17
O2♀*O2♂	4	4	10.3333
O2♀*O2♂	4	5	44.5
O2♀*O2♂	4	6	23.5
O2♀*O2♂	4	7	2.5
O2♀*O2♂	4	8	8
O2♀*O2♂	4	9	1
O2♀*O2♂	4	10	16
O2♀*O2♂	4	11	3
O2♀*O2♂	4	12	2.66667
O2♀*O2♂	4	13	24.3333
O2♀*O2♂	4	14	13.5
O2♀*O2♂	4	15	0
B2♀*O2♂	4	1	N/A
B2♀*O2♂	4	2	N/A
B2♀*O2♂	4	3	8
B2♀*O2♂	4	4	11
B2♀*O2♂	4	5	2.66667
B2♀*O2♂	4	6	30
B2♀*O2♂	4	7	13
B2♀*O2♂	4	8	0
B2♀*O2♂	4	9	23
B2♀*O2♂	4	10	14
B2♀*O2♂	4	11	0
B2♀*O2♂	4	12	34
B2♀*O2♂	4	13	31
B2♀*O2♂	4	14	13
B2♀*O2♂	4	15	6
O2♀*B2♂	4	1	25.3333
O2♀*B2♂	4	2	16.3333
O2♀*B2♂	4	3	19.6667
O2♀*B2♂	4	4	24.6667
O2♀*B2♂	4	5	14.6667
O2♀*B2♂	4	6	32
O2♀*B2♂	4	7	0
O2♀*B2♂	4	8	23.3333
O2♀*B2♂	4	9	18.6667
O2♀*B2♂	4	10	27.5
O2♀*B2♂	4	11	20.6667
O2♀*B2♂	4	12	27.5
O2♀*B2♂	4	13	7
O2♀*B2♂	4	14	2
O2♀*B2♂	4	15	31
B2♀*B2♂	4	1	13.3333
B2♀*B2♂	4	2	1
B2♀*B2♂	4	3	2
B2♀*B2♂	4	4	23
B2♀*B2♂	4	5	1.33333
B2♀*B2♂	4	6	7
B2♀*B2♂	4	7	12.3333
B2♀*B2♂	4	8	6.66667
B2♀*B2♂	4	9	12
B2♀*B2♂	4	10	16
B2♀*B2♂	4	11	8
B2♀*B2♂	4	12	2.5
B2♀*B2♂	4	13	10.3333
B2♀*B2♂	4	14	N/A
B2♀*B2♂	4	15	17.5
O3♀*O3♂	4	1	9
O3♀*O3♂	4	2	25
O3♀*O3♂	4	3	16.6667
O3♀*O3♂	4	4	18
O3♀*O3♂	4	5	9
O3♀*O3♂	4	6	23.6667
O3♀*O3♂	4	7	28.6667
O3♀*O3♂	4	8	9.33333
O3♀*O3♂	4	9	16
O3♀*O3♂	4	10	19.6667
O3♀*O3♂	4	11	15.5
O3♀*O3♂	4	12	9.66667
O3♀*O3♂	4	13	15.6667
O3♀*O3♂	4	14	25.5
O3♀*O3♂	4	15	13.3333
B3♀*O3♂	4	1	20.3333
B3♀*O3♂	4	2	17
B3♀*O3♂	4	3	23
B3♀*O3♂	4	4	N/A
B3♀*O3♂	4	5	17.6667
B3♀*O3♂	4	6	22
B3♀*O3♂	4	7	30
B3♀*O3♂	4	8	15
B3♀*O3♂	4	9	23
B3♀*O3♂	4	10	16.6667
B3♀*O3♂	4	11	N/A
B3♀*O3♂	4	12	19.6667
B3♀*O3♂	4	13	8.5
B3♀*O3♂	4	14	30
B3♀*O3♂	4	15	11.5
O3♀*B3♂	4	1	14.3333
O3♀*B3♂	4	2	9
O3♀*B3♂	4	3	20.3333
O3♀*B3♂	4	4	N/A
O3♀*B3♂	4	5	44
O3♀*B3♂	4	6	10.6667
O3♀*B3♂	4	7	18.6667
O3♀*B3♂	4	8	N/A
O3♀*B3♂	4	9	18
O3♀*B3♂	4	10	15
O3♀*B3♂	4	11	16.3333
O3♀*B3♂	4	12	21.6667
O3♀*B3♂	4	13	21.6667
O3♀*B3♂	4	14	31.3333
O3♀*B3♂	4	15	11
B3♀*B3♂	4	1	13.3333
B3♀*B3♂	4	2	14.3333
B3♀*B3♂	4	3	21.6667
B3♀*B3♂	4	4	42
B3♀*B3♂	4	5	0
B3♀*B3♂	4	6	28
B3♀*B3♂	4	7	13
B3♀*B3♂	4	8	5.66667
B3♀*B3♂	4	9	25.6667
B3♀*B3♂	4	10	7
B3♀*B3♂	4	11	26
B3♀*B3♂	4	12	16.5
B3♀*B3♂	4	13	16
B3♀*B3♂	4	14	6
B3♀*B3♂	4	15	43
O4♀*O4♂	4	1	0
O4♀*O4♂	4	2	13.6667
O4♀*O4♂	4	3	21.3333
O4♀*O4♂	4	4	10.5
O4♀*O4♂	4	5	10
O4♀*O4♂	4	6	17.5
O4♀*O4♂	4	7	30.6667
O4♀*O4♂	4	8	24
O4♀*O4♂	4	9	5.33333
O4♀*O4♂	4	10	17.6667
O4♀*O4♂	4	11	11.6667
O4♀*O4♂	4	12	24.6667
O4♀*O4♂	4	13	19
O4♀*O4♂	4	14	16.6667
O4♀*O4♂	4	15	30.3333
B4♀*O4♂	4	1	7.66667
B4♀*O4♂	4	2	4.5
B4♀*O4♂	4	3	4
B4♀*O4♂	4	4	0.333333
B4♀*O4♂	4	5	12
B4♀*O4♂	4	6	N/A
B4♀*O4♂	4	7	1.5
B4♀*O4♂	4	8	2
B4♀*O4♂	4	9	0
B4♀*O4♂	4	10	0
B4♀*O4♂	4	11	3
B4♀*O4♂	4	12	4.66667
B4♀*O4♂	4	13	8
B4♀*O4♂	4	14	0
B4♀*O4♂	4	15	0
O4♀*B4♂	4	1	7.66667
O4♀*B4♂	4	2	25
O4♀*B4♂	4	3	32
O4♀*B4♂	4	4	28.6667
O4♀*B4♂	4	5	23
O4♀*B4♂	4	6	29.3333
O4♀*B4♂	4	7	8.66667
O4♀*B4♂	4	8	17
O4♀*B4♂	4	9	34
O4♀*B4♂	4	10	26
O4♀*B4♂	4	11	29
O4♀*B4♂	4	12	15.6667
O4♀*B4♂	4	13	29
O4♀*B4♂	4	14	39.6667
O4♀*B4♂	4	15	20
B4♀*B4♂	4	1	12
B4♀*B4♂	4	2	18
B4♀*B4♂	4	3	8.66667
B4♀*B4♂	4	4	0
B4♀*B4♂	4	5	2.5
B4♀*B4♂	4	6	N/A
B4♀*B4♂	4	7	3.5
B4♀*B4♂	4	8	29
B4♀*B4♂	4	9	21.5
B4♀*B4♂	4	10	15
B4♀*B4♂	4	11	7.5
B4♀*B4♂	4	12	4
B4♀*B4♂	4	13	10
B4♀*B4♂	4	14	8
B4♀*B4♂	4	15	N/A
O5♀*O5♂	4	1	31
O5♀*O5♂	4	2	32.6667
O5♀*O5♂	4	3	30
O5♀*O5♂	4	4	26.6667
O5♀*O5♂	4	5	38.3333
O5♀*O5♂	4	6	15
O5♀*O5♂	4	7	25.3333
O5♀*O5♂	4	8	23.5
O5♀*O5♂	4	9	26.6667
O5♀*O5♂	4	10	22.6667
O5♀*O5♂	4	11	23
O5♀*O5♂	4	12	25
O5♀*O5♂	4	13	18.6667
O5♀*O5♂	4	14	20
O5♀*O5♂	4	15	20
B5♀*O5♂	4	1	26
B5♀*O5♂	4	2	12
B5♀*O5♂	4	3	5
B5♀*O5♂	4	4	0
B5♀*O5♂	4	5	0
B5♀*O5♂	4	6	19.5
B5♀*O5♂	4	7	23.6667
B5♀*O5♂	4	8	0
B5♀*O5♂	4	9	3.5
B5♀*O5♂	4	10	19
B5♀*O5♂	4	11	0
B5♀*O5♂	4	12	2.5
B5♀*O5♂	4	13	18.5
B5♀*O5♂	4	14	N/A
B5♀*O5♂	4	15	18.5
O5♀*B5♂	4	1	30.6667
O5♀*B5♂	4	2	21.3333
O5♀*B5♂	4	3	30.6667
O5♀*B5♂	4	4	45
O5♀*B5♂	4	5	19
O5♀*B5♂	4	6	0
O5♀*B5♂	4	7	16.6667
O5♀*B5♂	4	8	11
O5♀*B5♂	4	9	15
O5♀*B5♂	4	10	N/A
O5♀*B5♂	4	11	26.3333
O5♀*B5♂	4	12	29.5
O5♀*B5♂	4	13	30.6667
O5♀*B5♂	4	14	33
O5♀*B5♂	4	15	28.6667
B5♀*B5♂	4	1	24
B5♀*B5♂	4	2	11
B5♀*B5♂	4	3	20.3333
B5♀*B5♂	4	4	11
B5♀*B5♂	4	5	15
B5♀*B5♂	4	6	3
B5♀*B5♂	4	7	10.6667
B5♀*B5♂	4	8	11
B5♀*B5♂	4	9	0
B5♀*B5♂	4	10	12.3333
B5♀*B5♂	4	11	23
B5♀*B5♂	4	12	23.3333
B5♀*B5♂	4	13	16.6667
B5♀*B5♂	4	14	N/A
B5♀*B5♂	4	15	18.6667

## Sheet: Table S2
A. Full ANOVA Model
Source		DF	SS	MS	F Ratio	Prob > F
Female Genotype		1	13.5336	13.5336	0.2063	0.6498
Male Genotype		1	102.787	102.787	1.5671	0.2109
Week		3	2892.31	964.102	14.6984	<.0001
Week*Female		3	2622.49	874.162	13.3272	<.0001
Week*Male		3	721.792	240.597	3.6681	0.012
Female*Male		1	407.821	407.821	6.2175	0.0128
Week*Female*Male		3	121.006	40.3353	0.6149	0.6054
Error		1073	70380.4	65.592
B. ANOVA Models by Week
Week	Source	DF	SS	MS	F Ratio	Prob > F
1	Female Genotype	1	13.5336	13.5336	0.5564	0.4564
	Male Genotype	1	102.787	102.787	4.2255	0.0408
	Female*Male	1	407.821	407.821	16.7651	<.0001
	Error	264	6421.95	24.326
2	Female Genotype	1	366.705	366.705	7.6429	0.0061
	Male Genotype	1	109.613	109.613	2.2846	0.1318
	Female*Male	1	69.2217	69.2217	1.4427	0.2307
	Error	274	13146.5	47.98
3	Female Genotype	1	1860.48	1860.48	17.5883	<.0001
	Male Genotype	1	301.602	301.602	2.8512	0.0925
	Female*Male	1	399.988	399.988	3.7813	0.0529
	Error	270	28560.5	105.78
4	Female Genotype	1	5081.53	5081.53	60.5177	<.0001
	Male Genotype	1	656.272	656.272	7.8158	0.0056
	Female*Male	1	104.329	104.329	1.2425	0.266
	Error	265	22251.4	83.97
C. Tukey Tests
Week	Genotype		Least Squares Mean		Std Error	Tukey Test
1	B1♀*B1♂		14.9636		0.616512	B
	B1♀*O1♂		16.193		0.593754	AB
	O1♀*B1♂		17.8823		0.611751	A
	O1♀*O1♂		14.1739		0.589498	B
2	B1♀*B1♂		13.6472		0.833883	B
	B1♀*O1♂		15.9021		0.839993	AB
	O1♀*B1♂		16.9437		0.839993	A
	O1♀*O1♂		17.2016		0.810715	A
3	B1♀*B1♂		16.7937		1.2565	B
	B1♀*O1♂		17.1119		1.2565	B
	O1♀*B1♂		24.4236		1.22928	A
	O1♀*O1♂		19.9077		1.22928	B
4	B1♀*B1♂		12.2786		1.11949	C
	B1♀*O1♂		10.3978		1.16375	C
	O1♀*B1♂		22.2295		1.10314	A
	O1♀*O1♂		17.8545		1.08749	B

## Sheet: Table S3
Chromosome Arm	Interval start	Interval end	Interval size (bp)	Number of SNPs in interval	Genes in Interval FlyBase ID	Genes in Interval Symbol
2L	1142430	1142430	1	1
2L	1157083	1157083	1	1	FBgn0261458	capt
2L	1190435	1190437	3	2	FBgn0031322	CG5001
2L	1195371	1195371	1	1	FBgn0031322	CG5001
2L	1319640	1319640	1	1
2L	1375880	1375880	1	1
2L	1417717	1417717	1	1	FBgn0002543	lea
2L	1647659	1647659	1	1
2L	1786774	1786774	1	1
2L	1788059	1788359	301	3
2L	1793842	1793842	1	1	FBgn0045501	Gr22a
2L	1824317	1825767	1451	2	FBgn0051664	CG31664
2L	1827446	1827446	1	1
2L	1830117	1830117	1	1
2L	1832782	1832782	1	1
2L	2478099	2478099	1	1
2L	2798366	2798370	5	2	FBgn0004242	Syt1
2L	2861182	2861182	1	1	FBgn0031474	CG2991
2L	2862053	2862053	1	1	FBgn0031474	CG2991
2L	2878631	2878649	19	4	FBgn0051950	CG31950
2L	2915390	2915390	1	1	FBgn0041111	lilli
2L	2921146	2921262	117	2	FBgn0041111	lilli
2L	3138816	3138816	1	1	FBgn0015600	toc
2L	3140132	3140160	29	2	FBgn0015600	toc
2L	3142829	3142829	1	1	FBgn0015600	toc
2L	3147860	3147860	1	1	FBgn0011648	Mad
2L	3155206	3155206	1	1	FBgn0011648	Mad
2L	3181393	3181416	24	2	FBgn0085422	CG34393
2L	3197288	3197292	5	2	FBgn0085422	CG34393
2L	3200792	3200792	1	1
2L	3202082	3202082	1	1
2L	3232531	3232851	321	2
2L	3234199	3235299	1101	4
2L	3262122	3262122	1	1
2L	3266289	3266289	1	1
2L	3268106	3268106	1	1
2L	3271272	3271272	1	1	FBgn0031513	CG3347
2L	3273907	3273938	32	3
2L	3276819	3276819	1	1	FBgn0031514	CG3332
2L	3277589	3277589	1	1	FBgn0031514	CG3332
2L	3279191	3279399	209	3	FBgn0031514	CG3332
2L	3280907	3282801	1895	7
2L	3283094	3283094	1	1
2L	3284423	3284423	1	1
2L	3285141	3285141	1	1
2L	3286398	3286398	1	1
2L	3287999	3288161	163	5	FBgn0265678	CR44485
2L	3289331	3289331	1	1
2L	3292167	3292167	1	1	FBgn0031515	CG9664
2L	3292446	3292446	1	1	FBgn0031515	CG9664
2L	3294378	3294744	367	3	FBgn0031515	CG9664
2L	3304811	3305803	993	3	FBgn0031518	CG3277
2L	3308507	3308507	1	1	FBgn0031518	CG3277
2L	3387598	3387598	1	1	FBgn0259949	Sfp23F
2L	3396650	3396770	121	2
2L	3397079	3397079	1	1
2L	3400026	3400026	1	1
2L	3542423	3542423	1	1	FBgn0024244	drm
2L	3557218	3557218	1	1
2L	3683494	3683494	1	1	FBgn0085369	CG34340
2L	3707915	3707915	1	1	FBgn0015376	cutlet
2L	3737927	3737927	1	1	FBgn0031568	CG10019
2L	4024953	4024953	1	1
2L	4034398	4034398	1	1	FBgn0000547	ed
2L	4187492	4187506	15	3	FBgn0051961	CG31961
2L	4220642	4220642	1	1	FBgn0001075	ft
2L	4253118	4253118	1	1
2L	4518371	4518371	1	1	FBgn0053196	dp
2L	4552716	4552716	1	1	FBgn0053196	dp
2L	6758948	6758948	1	1	FBgn0031856	CG11322
2L	6771603	6771603	1	1	FBgn0031857	CG11321
2L	6774900	6774900	1	1	FBgn0031858	CG17378
2L	6780952	6780952	1	1	FBgn0015776	nrv1
2L	6790261	6790261	1	1	FBgn0015777	nrv2
2L	6807013	6807013	1	1
2L	6810084	6810084	1	1
2L	6834216	6834244	29	7	FBgn0051632	sens2
2L	6835657	6835719	63	3	FBgn0051632	sens2
2L	6837266	6837266	1	1	FBgn0051632	sens2
2L	6846958	6846958	1	1
2L	6895150	6895150	1	1	FBgn0031866	Nlg2
2L	6898433	6898438	6	2	FBgn0031866	Nlg2
2L	6901009	6901009	1	1	FBgn0031866	Nlg2
2L	6901064	6901064	1	1	FBgn0031866	Nlg2
2L	6908438	6908438	1	1	FBgn0031868	Rat1
2L	6931521	6931638	118	2	FBgn0004838	Hrb27C
2L	6935741	6935741	1	1	FBgn0031869	CG18304
2L	6941009	6941009	1	1	FBgn0031869	CG18304
2L	6988275	6988275	1	1	FBgn0031879	uif
2L	8271040	8271045	6	2	FBgn0003502	Btk29A
2L	8275851	8275851	1	1	FBgn0003502	Btk29A
2L	8314078	8314078	1	1	FBgn0032018	CG7806
2L	8322820	8322820	1	1	FBgn0032021	CG7781
2L	8335141	8335141	1	1
2L	9074781	9074781	1	1
2L	9080890	9080906	17	2
2L	9631150	9631150	1	1
2L	9631740	9631740	1	1
2L	9633448	9633448	1	1
2L	9649188	9649188	1	1	FBgn0032136	Apoltp
2L	9649753	9649753	1	1	FBgn0032136	Apoltp
2L	9671968	9672002	35	3
2L	9672330	9672330	1	1
2L	9672675	9672706	32	2
2L	9673019	9673019	1	1
2L	9673337	9673337	1	1
2L	9681484	9681484	1	1
2L	9682946	9682946	1	1	FBgn0000273	PkaC1
2L	9685844	9686921	1078	7	FBgn0000273	PkaC1
2L	9687347	9687745	399	2	FBgn0000273	PkaC1
2L	9688113	9688116	4	2	FBgn0000273	PkaC1
2L	9751781	9751781	1	1
2L	9752710	9752760	51	3
2L	9757913	9758861	949	5	FBgn0022720	zf30C
2L	9759494	9759519	26	4	FBgn0022720	zf30C
2L	9762424	9762427	4	2	FBgn0011291	Taf11
2L	10215899	10215899	1	1	FBgn0024320	Npc1a
2L	10228308	10228308	1	1	FBgn0032197	CG5694
2L	10692854	10692854	1	1
2L	10702533	10702533	1	1	FBgn0024740	Lip2
2L	10704159	10704161	3	1	FBgn0032287	CG6415
2L	10704160	10704160	1	1	FBgn0024740	Lip2
2L	10707096	10707149	54	3	FBgn0024740	Lip2
2L	10920355	10920355	1	1	FBgn0261871	dpr2
2L	10944956	10944956	1	1	FBgn0261871	dpr2
2L	10966776	10967328	553	4	FBgn0053129	CG33129
2L	10975352	10975352	1	1
2L	10975823	10975823	1	1	FBgn0010612	l(2)06225
2L	10976524	10976524	1	1
2L	10984555	10984556	2	2	FBgn0004872	piwi
2L	11017657	11017665	9	2	FBgn0032330,FBgn0032331	Samuel,CG14913
2L	11019659	11019659	1	1	FBgn0032330	Samuel
2L	11022357	11022357	1	1	FBgn0032330	Samuel
2L	11027195	11027195	1	1	FBgn0032330	Samuel
2L	11049875	11049875	1	1	FBgn0032330	Samuel
2L	11050746	11050746	1	1	FBgn0032330	Samuel
2L	11067685	11067685	1	1
2L	11073602	11073602	1	1
2L	11192080	11192080	1	1	FBgn0259822	Cabeta
2L	11422305	11422305	1	1
2L	13825707	13825707	1	1	FBgn0004406	tam
2L	13839908	13839910	3	1	FBgn0028509	CenG1A
2L	13839909	13839909	1	1	FBgn0053307	CG33307
2L	13841955	13841955	1	1	FBgn0028509	CenG1A
2L	13841983	13841983	1	1	FBgn0028509	CenG1A
2L	14202347	14202456	110	7	FBgn0016930	Dyrk2
2L	14547937	14547949	13	3	FBgn0250844	CG4218
2L	14547995	14548000	6	2	FBgn0250844	CG4218
2L	14551724	14551724	1	1
2L	14784996	14784996	1	1
2L	15811632	15811632	1	1	FBgn0262150	CG42876
2L	15837579	15837579	1	1
2L	15857950	15857950	1	1
2L	15878639	15878639	1	1	FBgn0028935	CG7653
2L	16008230	16008230	1	1	FBgn0028644	beatIc
2L	16011639	16011639	1	1	FBgn0028644	beatIc
2L	16024009	16024212	204	4	FBgn0028644	beatIc
2L	16042144	16042146	3	1	FBgn0266459	CG45084
2L	16042145	16042145	1	1	FBgn0000182	BicC
2L	16050459	16050459	1	1	FBgn0013433	beatIa
2L	16058031	16058045	15	2	FBgn0013433	beatIa
2L	16101133	16101133	1	1
2L	16106898	16106898	1	1
2L	16114699	16115518	820	2
2L	16185700	16185700	1	1	FBgn0001991	Caalpha1D
2L	16188315	16188315	1	1	FBgn0001991	Caalpha1D
2L	16194853	16194853	1	1
2L	16200092	16200185	94	2
2L	16209265	16209265	1	1
2L	17527434	17527434	1	1	FBgn0032648	CG15144
2L	17614950	17614950	1	1
2L	19364208	19364208	1	1
2L	19434864	19434864	1	1	FBgn0032782	Rab9
2R	453936	453936	1	1
2R	4236285	4236285	1	1	FBgn0261588	pdm3
2R	4237300	4237300	1	1	FBgn0261588	pdm3
2R	4304669	4304669	1	1
2R	4936907	4936907	1	1	FBgn0033368	CG13743
2R	5266835	5266835	1	1	FBgn0033405	CG13954
2R	5295761	5295761	1	1	FBgn0016078	wun
2R	5342146	5342148	3	2	FBgn0053757,FBgn0259234	CG33757,Camta
2R	5356100	5356100	1	1	FBgn0259234	Camta
2R	5366071	5366074	4	2	FBgn0259234	Camta
2R	5420695	5420695	1	1	FBgn0259246	brp
2R	5444312	5444770	459	4
2R	5447896	5447898	3	1	FBgn0033422	Or45b
2R	5447897	5447897	1	1	FBgn0266819	CR45281
2R	5451758	5451758	1	1	FBgn0266819	CR45281
2R	8215478	8215478	1	1	FBgn0264560	garz
2R	8253664	8253664	1	1	FBgn0053013	CR33013
2R	8305278	8305278	1	1	FBgn0033732	CG13157
2R	8560536	8560536	1	1	FBgn0261625	CG42708
2R	8604148	8604148	1	1	FBgn0261545	CG42663
2R	8663846	8663846	1	1
2R	8672302	8672976	675	2	FBgn0003326,FBgn0266630	sca,CR45137
2R	8706037	8706056	20	3
2R	8706154	8706154	1	1
2R	8712592	8712592	1	1
2R	8723522	8723596	75	2
2R	8731467	8731467	1	1	FBgn0028963	Or49b
2R	8840166	8840166	1	1
2R	8860214	8860214	1	1	FBgn0005624	Psc
2R	8863808	8864252	445	5	FBgn0005624	Psc
2R	8905037	8905037	1	1
2R	8937507	8937507	1	1
2R	8947045	8947045	1	1	FBgn0033791	Drl2
2R	8969259	8969259	1	1
2R	8984376	8984376	1	1
2R	8995804	8995804	1	1
2R	9054000	9054000	1	1	FBgn0033799	GLaz
2R	9342595	9342601	7	2	FBgn0000119	arr
2R	9604443	9604443	1	1	FBgn0000633	fas
2R	9661143	9661143	1	1	FBgn0033867	Cpr50Ca
2R	9661396	9661396	1	1	FBgn0033867	Cpr50Ca
2R	9669186	9669193	8	2	FBgn0033867	Cpr50Ca
2R	9681959	9681959	1	1
2R	9740250	9740250	1	1	FBgn0050485	CG30485
2R	9742856	9742873	18	2	FBgn0033880,FBgn0265498	CG6553,CR44367
2R	9780768	9780771	4	2	FBgn0013733	shot
2R	9798743	9798743	1	1	FBgn0013733	shot
2R	9799311	9799311	1	1	FBgn0013733	shot
2R	9803479	9803479	1	1	FBgn0013733	shot
2R	9805512	9805512	1	1	FBgn0013733	shot
2R	9811351	9811351	1	1	FBgn0013733	shot
2R	9830533	9830533	1	1	FBgn0033885	DJalpha
2R	9830824	9830824	1	1	FBgn0033885	DJalpha
2R	9835849	9837297	1449	3	FBgn0262739	AGO1
2R	9843926	9843980	55	2	FBgn0262739	AGO1
2R	9853438	9853438	1	1	FBgn0013770	Cp1
2R	9854442	9854442	1	1	FBgn0013770	Cp1
2R	9857008	9857008	1	1	FBgn0020766	Aatsphe
2R	9858516	9858516	1	1	FBgn0033887	St4
2R	9861177	9861177	1	1	FBgn0033889	CG6701
2R	9863509	9863509	1	1	FBgn0033889	CG6701
2R	9874792	9874792	1	1	FBgn0020620	RNtre
2R	9893625	9893625	1	1	FBgn0002643	mam
2R	9915993	9915993	1	1	FBgn0002643	mam
2R	9929369	9929369	1	1	FBgn0002643	mam
2R	9929455	9929455	1	1	FBgn0002643	mam
2R	9933273	9933309	37	2	FBgn0002643	mam
2R	9933751	9933751	1	1	FBgn0002643	mam
2R	9959206	9959206	1	1	FBgn0040752	Prosap
2R	9961345	9961345	1	1	FBgn0040752	Prosap
2R	10000645	10000645	1	1	FBgn0040752	Prosap
2R	10001884	10001961	78	2	FBgn0040752	Prosap
2R	10013307	10013307	1	1	FBgn0040752	Prosap
2R	10061134	10061654	521	3	FBgn0000289	cg
2R	10098947	10098947	1	1	FBgn0005613	Sox15
2R	10525688	10525914	227	4
2R	10526048	10526048	1	1	FBgn0262881	CG43236
2R	10526790	10526790	1	1	FBgn0261632	CG42715
2R	10715684	10715684	1	1
2R	10979978	10979978	1	1
2R	11042471	11042471	1	1
2R	11046509	11046606	98	4	FBgn0013467	igl
2R	11048908	11048908	1	1	FBgn0013467	igl
2R	11052862	11052876	15	3	FBgn0013467	igl
2R	11063808	11063808	1	1	FBgn0013467	igl
2R	11065115	11065115	1	1	FBgn0013467	igl
2R	11078207	11078207	1	1
2R	11129408	11129408	1	1
2R	11137789	11137796	8	3	FBgn0003328	scb
2R	11146882	11147197	316	6	FBgn0034005	ItgalphaPS4
2R	11148482	11148482	1	1	FBgn0034005	ItgalphaPS4
2R	11154726	11154726	1	1	FBgn0265194	Trpm
2R	11155675	11155675	1	1	FBgn0265194	Trpm
2R	11158875	11158875	1	1	FBgn0265194	Trpm
2R	11163653	11163653	1	1	FBgn0265194	Trpm
2R	11164100	11164100	1	1	FBgn0265194	Trpm
2R	11167224	11167224	1	1	FBgn0265194	Trpm
2R	11167912	11167912	1	1	FBgn0265194	Trpm
2R	11172328	11172328	1	1	FBgn0265194	Trpm
2R	11187452	11187452	1	1	FBgn0265194	Trpm
2R	11191398	11191398	1	1	FBgn0265194	Trpm
2R	11194341	11194341	1	1	FBgn0265194	Trpm
2R	11204452	11204452	1	1	FBgn0004698	mus210
2R	11220761	11220761	1	1	FBgn0034012	Hr51
2R	11221952	11221952	1	1	FBgn0034012	Hr51
2R	11227050	11227570	521	14
2R	11227658	11227675	18	3
2R	11227739	11227936	198	8
2R	11248462	11248462	1	1	FBgn0034013	unc5
2R	11250503	11250503	1	1	FBgn0034013	unc5
2R	11260959	11260959	1	1	FBgn0262965	CR43276
2R	11266741	11270138	3398	4	FBgn0000996,FBgn0026370	dup,SRPK
2R	11283713	11284383	671	5
2R	11290209	11290209	1	1	FBgn0263980	CG43729
2R	11292332	11293768	1437	5	FBgn0263980,FBgn0266378	CG43729,CR45020
2R	11294164	11294223	60	4	FBgn0263980	CG43729
2R	11295585	11295585	1	1	FBgn0263980	CG43729
2R	11296313	11296313	1	1	FBgn0263980	CG43729
2R	11296605	11297191	587	5	FBgn0014865,FBgn0263980	Mtk,CG43729
2R	11299553	11299559	7	3	FBgn0263980	CG43729
2R	11307109	11307109	1	1	FBgn0263980	CG43729
2R	11310085	11310398	314	6	FBgn0263980	CG43729
2R	11311214	11311216	3	1	FBgn0263980	CG43729
2R	11311215	11311215	1	1	FBgn0050472	CG30472
2R	11311761	11311761	1	1	FBgn0263980	CG43729
2R	11318996	11320246	1251	7	FBgn0263980	CG43729
2R	11321514	11322480	967	8	FBgn0263980	CG43729
2R	11322604	11322604	1	1	FBgn0263980	CG43729
2R	11323561	11324009	449	3	FBgn0263980	CG43729
2R	11324617	11324633	17	2	FBgn0263980	CG43729
2R	11325722	11325722	1	1	FBgn0263980	CG43729
2R	11330150	11330150	1	1	FBgn0263980	CG43729
2R	11340262	11340262	1	1	FBgn0263980	CG43729
2R	11340874	11340877	4	2	FBgn0263980	CG43729
2R	11343561	11343608	48	2	FBgn0263980	CG43729
2R	11344712	11344712	1	1	FBgn0263980	CG43729
2R	11345033	11345033	1	1	FBgn0263980	CG43729
2R	11356717	11356717	1	1	FBgn0263980	CG43729
2R	11370497	11370589	93	2
2R	11380209	11381515	1307	7	FBgn0034022	CG12964
2R	11382189	11382205	17	3	FBgn0034022	CG12964
2R	11382366	11382366	1	1	FBgn0034022	CG12964
2R	11387245	11387650	406	6	FBgn0034023	Ir52a
2R	11391366	11392089	724	5	FBgn0050468	Ir52c
2R	11398960	11398983	24	2
2R	11401070	11401070	1	1	FBgn0034025	GalNAcT1
2R	11416248	11416248	1	1	FBgn0019968	Khc73
2R	11464739	11464739	1	1
2R	11477394	11477394	1	1
2R	11524170	11524170	1	1	FBgn0260429	CG42524
2R	11549134	11549134	1	1	FBgn0023441	fus
2R	11551314	11552023	710	2	FBgn0023441	fus
2R	11576743	11576743	1	1
2R	11601588	11602667	1080	2
2R	11604000	11604000	1	1
2R	11608032	11608032	1	1
2R	11612193	11612193	1	1
2R	11628358	11628358	1	1	FBgn0050089	CG30089
2R	11633628	11633655	28	2	FBgn0050089	CG30089
2R	11642494	11642494	1	1	FBgn0050089	CG30089
2R	11682399	11682401	3	1	FBgn0265991	Zasp52
2R	11682400	11682400	1	1	FBgn0034046	tun
2R	11910162	11910162	1	1	FBgn0034067	CG8399
2R	11939950	11939950	1	1	FBgn0034071	CG8405
2R	12136242	12136275	34	3	FBgn0261612	CngA
2R	12141069	12141296	228	2	FBgn0261612	CngA
2R	12145076	12145076	1	1	FBgn0261612	CngA
2R	12146687	12146687	1	1	FBgn0261612	CngA
2R	12163552	12163554	3	2	FBgn0053017	CG33017
2R	12187775	12187837	63	2	FBgn0266767	CR45232
2R	12188081	12188118	38	2	FBgn0266767	CR45232
2R	12197729	12197729	1	1	FBgn0085428	Nox
2R	12209945	12209945	1	1	FBgn0034114	CG4282
2R	12276055	12276055	1	1	FBgn0264273	Sema2b
2R	12287197	12287197	1	1	FBgn0264273	Sema2b
2R	12320769	12320769	1	1
2R	12324668	12324668	1	1
2R	12327083	12327083	1	1
2R	12337100	12337100	1	1
2R	12344793	12344799	7	2
2R	12349311	12349311	1	1
2R	12352384	12353783	1400	9
2R	12353935	12355740	1806	4	FBgn0261292,FBgn0261293	CheB53a,CheB53b
2R	12356978	12357331	354	10
2R	12359635	12359851	217	12
2R	12369219	12369219	1	1
2R	12371354	12371354	1	1
2R	12372349	12372349	1	1	FBgn0034131	CG15712
2R	12372665	12372665	1	1	FBgn0034131	CG15712
2R	12375214	12375214	1	1	FBgn0053458	CG33458
2R	12375421	12375486	66	3
2R	12375851	12375856	6	2	FBgn0053459	CG33459
2R	12378565	12381260	2696	11	FBgn0034132	SLap8
2R	12381357	12381357	1	1
2R	12387924	12387924	1	1	FBgn0011260	Sema2a
2R	12389979	12390256	278	3	FBgn0011260	Sema2a
2R	12393176	12393222	47	2	FBgn0011260	Sema2a
2R	12394610	12394659	50	3	FBgn0011260	Sema2a
2R	12396015	12396015	1	1	FBgn0011260	Sema2a
2R	12396975	12397142	168	4	FBgn0011260	Sema2a
2R	12398623	12398623	1	1	FBgn0011260	Sema2a
2R	12400447	12402809	2363	13	FBgn0011260	Sema2a
2R	12406947	12407249	303	3	FBgn0011260	Sema2a
2R	12408549	12408549	1	1	FBgn0011260	Sema2a
2R	12411133	12411133	1	1	FBgn0011260	Sema2a
2R	12412860	12412860	1	1	FBgn0011260	Sema2a
2R	12421070	12421072	3	3
2R	12438318	12438318	1	1
2R	12442133	12442133	1	1	FBgn0034135	Syn2
2R	12443314	12443314	1	1	FBgn0034135	Syn2
2R	12451077	12451077	1	1	FBgn0034136	DAT
2R	12451239	12451239	1	1	FBgn0034136	DAT
2R	12772399	12772399	1	1	FBgn0025833	CG8910
2R	12777856	12777856	1	1	FBgn0025833	CG8910
2R	13084720	13084720	1	1
2R	13508727	13508727	1	1	FBgn0034253	CG10936
2R	13546983	13546983	1	1	FBgn0050106	CCHa1R
2R	13547010	13547010	1	1	FBgn0050106	CCHa1R
2R	13719438	13719441	4	3	FBgn0259211	grh
2R	13978515	13978515	1	1	FBgn0085415	CG34386
2R	14152679	14152679	1	1
2R	14195351	14195351	1	1	FBgn0010575	sbb
2R	14349664	14349664	1	1	FBgn0028496	CG30116
2R	14548553	14548555	3	1	FBgn0259202	CG42306
2R	14548554	14548554	1	1	FBgn0034372	Gint3
2R	14614258	14614258	1	1	FBgn0053147	Hs3stA
2R	14668782	14668782	1	1
2R	14824539	14824539	1	1	FBgn0034408	sano
2R	14829359	14830241	883	3	FBgn0034408	sano
2R	14840325	14840325	1	1	FBgn0034408	sano
2R	14840974	14840974	1	1	FBgn0034408	sano
2R	14869497	14870215	719	3
2R	14878654	14878654	1	1	FBgn0265356	tn
2R	14882240	14883693	1454	4	FBgn0263473,FBgn0265356	snoRNA:abbaa,tn
2R	14905169	14905169	1	1
2R	14908347	14908486	140	3
2R	14913738	14913738	1	1	FBgn0263116	5HT1B
2R	14937135	14937135	1	1
2R	14938750	14938750	1	1
2R	14942273	14942273	1	1
2R	14945694	14945756	63	2
2R	14983374	14983383	10	3	FBgn0004168,FBgn0050125	5HT1A,Ir56a
2R	14988354	14988354	1	1	FBgn0004168	5HT1A
2R	14988792	14988860	69	5	FBgn0004168	5HT1A
2R	14988909	14988942	34	4	FBgn0004168	5HT1A
2R	15022264	15022264	1	1	FBgn0034418	CG15118
2R	15537858	15537858	1	1
2R	15964145	15964146	2	2
2R	16013019	16013023	5	2
2R	16017574	16017574	1	1
2R	16020347	16020586	240	2
2R	16046984	16046984	1	1
2R	16052089	16052135	47	3
2R	16058596	16058685	90	2
2R	16061897	16061936	40	3
2R	16063224	16063394	171	3
2R	16066105	16066286	182	4
2R	16072397	16072397	1	1
2R	16072957	16072957	1	1
2R	16076950	16076950	1	1
2R	16078405	16078405	1	1
2R	16079983	16079994	12	2
2R	16083803	16083803	1	1
2R	16090321	16090321	1	1
2R	16090930	16091007	78	2
2R	16093973	16093973	1	1
2R	16097775	16097775	1	1
2R	16099535	16099535	1	1	FBgn0034483	CG16894
2R	16101879	16102305	427	4
2R	16105114	16105186	73	2
2R	16107727	16107727	1	1
2R	16108776	16108776	1	1
2R	16110843	16110843	1	1
2R	16116968	16116968	1	1
2R	16120289	16120289	1	1	FBgn0034484	CG11044
2R	16138192	16138879	688	7	FBgn0034490	CG9864
2R	16139750	16139750	1	1	FBgn0034490	CG9864
2R	16142631	16142631	1	1	FBgn0025720	Ate1
2R	16148306	16148943	638	3	FBgn0034491	Hsl
2R	16150980	16150980	1	1	FBgn0003114	plu
2R	16152024	16152511	488	3	FBgn0010411,FBgn0034493,FBgn0264360	RpS18,CG8908,CR43812
2R	16153966	16154178	213	2	FBgn0034493	CG8908
2R	16154779	16154818	40	2	FBgn0034493	CG8908
2R	16155971	16156066	96	2	FBgn0034493	CG8908
2R	16170840	16170921	82	2	FBgn0034498	CG16868
2R	16173100	16173609	510	5	FBgn0034498	CG16868
2R	16175194	16175545	352	4	FBgn0085228	CG34199
2R	16178164	16178164	1	1	FBgn0034499	Cpr56F
2R	16184137	16184153	17	2
2R	16189264	16189264	1	1
2R	16190867	16190867	1	1	FBgn0265852	CR44641
2R	16191217	16191696	480	6
2R	16193430	16193431	2	2	FBgn0034500	CG11200
2R	16205192	16205192	1	1	FBgn0034502	CG13871
2R	16210667	16210667	1	1	FBgn0027529	CG8920
2R	16212597	16212597	1	1	FBgn0027529	CG8920
2R	16224331	16224331	1	1
2R	16225906	16226151	246	6
2R	16226392	16227760	1369	12
2R	16228251	16228256	6	2
2R	16235376	16235941	566	7
2R	16240393	16241491	1099	2
2R	16246021	16246463	443	4
2R	16248853	16248853	1	1
2R	16251799	16265650	13852	11
2R	16268298	16268298	1	1
2R	16269911	16270263	353	4
2R	16274446	16274446	1	1
2R	16275980	16276082	103	4
2R	16276165	16276910	746	3
2R	16277145	16277371	227	2
2R	16278203	16278535	333	3
2R	16278543	16283041	4499	13
2R	16283512	16283594	83	2
2R	16285718	16286947	1230	8
2R	16287052	16287079	28	2
2R	16297996	16298258	263	3
2R	16435734	16435740	7	2	FBgn0050145	Obp57e
2R	16740547	16740547	1	1
2R	16813010	16813010	1	1	FBgn0020617	Rx
2R	16820102	16820102	1	1	FBgn0020617	Rx
2R	16820355	16820355	1	1	FBgn0020617	Rx
2R	16837747	16837747	1	1	FBgn0053704	CG33704
2R	16839956	16839956	1	1
2R	16847562	16847620	59	3	FBgn0008636	hbn
2R	16847706	16847718	13	2	FBgn0008636	hbn
2R	16847851	16847851	1	1	FBgn0008636	hbn
2R	16850678	16850685	8	2
2R	16851672	16851672	1	1
2R	16852043	16852043	1	1
2R	16859662	16859662	1	1
2R	16914732	16914732	1	1
2R	16923712	16923728	17	5
2R	16923819	16923831	13	3
2R	16923921	16924592	672	4
2R	16924906	16924906	1	1
2R	16955325	16955325	1	1
2R	16955429	16955440	12	3
2R	16961236	16961236	1	1
2R	16976988	16976988	1	1	FBgn0034585	Rbpn5
2R	16984511	16984513	3	1	FBgn0011824	CG4038
2R	16984512	16984512	1	1	FBgn0085425	CG34396
2R	16991764	16991764	1	1	FBgn0015721	ktub
2R	17005179	17005179	1	1	FBgn0015721	ktub
2R	17024340	17024340	1	1	FBgn0034590	Magi
2R	17025717	17025717	1	1	FBgn0034590	Magi
2R	17061884	17061884	1	1	FBgn0261850	Xpd
2R	17100519	17100519	1	1	FBgn0027073	CG4302
2R	17100815	17100815	1	1	FBgn0027073	CG4302
2R	17113466	17113466	1	1	FBgn0034606	ASPP
2R	17120390	17120390	1	1	FBgn0034606	ASPP
2R	17120455	17120455	1	1	FBgn0034606	ASPP
2R	17124794	17124794	1	1	FBgn0034606	ASPP
2R	17125952	17125954	3	2	FBgn0034606	ASPP
2R	17140760	17140760	1	1
2R	17148581	17148585	5	2	FBgn0085426	Rgk3
2R	17150096	17150096	1	1	FBgn0085426	Rgk3
2R	17169296	17169296	1	1
2R	17172210	17172210	1	1	FBgn0034611	MFS16
2R	17173216	17173216	1	1	FBgn0034612	CG10505
2R	17174336	17174336	1	1	FBgn0034612	CG10505
2R	17180089	17180089	1	1	FBgn0050390	Sgf29
2R	17223207	17223207	1	1	FBgn0020306	dom
2R	17229618	17229618	1	1	FBgn0034622	CG15666
2R	17237081	17237081	1	1	FBgn0034624	CG17974
2R	17239618	17241261	1644	10
2R	17246651	17246651	1	1	FBgn0000395	cv2
2R	17250778	17250778	1	1	FBgn0000395	cv2
2R	17259465	17259465	1	1	FBgn0000395	cv2
2R	17609491	17609491	1	1	FBgn0034657	LBR
2R	17645890	17645890	1	1
2R	17648416	17648416	1	1
2R	17716711	17716711	1	1	FBgn0034662	CG13492
2R	17727126	17727138	13	2
2R	17742013	17742013	1	1
2R	17889642	17889646	5	2	FBgn0085399	CG34370
2R	17892849	17892849	1	1	FBgn0085399	CG34370
2R	17895436	17895436	1	1	FBgn0085399	CG34370
2R	17898241	17898241	1	1	FBgn0085399	CG34370
2R	17903966	17903966	1	1	FBgn0085399	CG34370
2R	17921704	17921704	1	1	FBgn0085399	CG34370
2R	17922782	17922784	3	1	FBgn0085399	CG34370
2R	17922783	17922783	1	1	FBgn0034681	CG9308
2R	17923084	17923086	3	1	FBgn0085399	CG34370
2R	17923085	17923085	1	1	FBgn0034681	CG9308
2R	17924105	17924105	1	1	FBgn0085399	CG34370
2R	17926163	17926163	1	1	FBgn0085399	CG34370
2R	17928845	17928845	1	1
2R	17929909	17929924	16	2	FBgn0005778	PpD5
2R	17933057	17933057	1	1
2R	17933944	17933944	1	1
2R	17937619	17937619	1	1
2R	17941424	17941427	4	3
2R	17942160	17942160	1	1
2R	17944002	17944461	460	4	FBgn0034683	CG13500
2R	17946124	17946124	1	1
2R	17947321	17947321	1	1	FBgn0034684	CG13501
2R	17950900	17950900	1	1	FBgn0265192	Snp
2R	17951200	17951200	1	1	FBgn0265192	Snp
2R	17955327	17955329	3	1	FBgn0265192	Snp
2R	17955328	17955328	1	1	FBgn0265184	CG44249
2R	17956440	17956440	1	1	FBgn0265192	Snp
2R	17968361	17968361	1	1	FBgn0034691	Synj
2R	17970407	17970407	1	1	FBgn0034691	Synj
2R	17978589	17978598	10	2	FBgn0265046	CG44163
2R	17987919	17987919	1	1
2R	17997458	17997590	133	2	FBgn0243516	Vrp1
2R	17999692	17999692	1	1	FBgn0243516	Vrp1
2R	18025949	18026151	203	7	FBgn0000008	a
2R	18026951	18026951	1	1	FBgn0000008	a
2R	18034500	18034500	1	1	FBgn0000008	a
2R	18035582	18035805	224	8	FBgn0000008	a
2R	18038121	18038121	1	1	FBgn0000008	a
2R	18039441	18039441	1	1	FBgn0000008	a
2R	18043374	18043374	1	1	FBgn0000008	a
2R	18053841	18053841	1	1	FBgn0000008	a
2R	18061917	18061917	1	1	FBgn0034703	CG3045
2R	18062828	18062871	44	3	FBgn0034704,FBgn0266644	CG6758,CR45151
2R	18070829	18070829	1	1	FBgn0034707	MED16
2R	18077129	18077129	1	1	FBgn0034708	Vps35
2R	18081424	18081424	1	1	FBgn0034709	Swim
2R	18081613	18081613	1	1	FBgn0034709	Swim
2R	18081819	18081819	1	1	FBgn0034709	Swim
2R	18082640	18082662	23	2	FBgn0034709	Swim
2R	18086267	18086267	1	1	FBgn0034709	Swim
2R	18086422	18086422	1	1	FBgn0034709	Swim
2R	18088515	18088515	1	1	FBgn0034709	Swim
2R	18089063	18089066	4	2	FBgn0034709,FBgn0266925	Swim,CR45376
2R	18089569	18089571	3	1	FBgn0034709	Swim
2R	18089570	18089570	1	1	FBgn0266925	CR45376
2R	18090724	18090724	1	1
2R	18092710	18092710	1	1	FBgn0034710	CG3292
2R	18093585	18093585	1	1	FBgn0034711	CG3290
2R	18094255	18094505	251	3	FBgn0034711	CG3290
2R	18095227	18095295	69	2	FBgn0034711	CG3290
2R	18096353	18096486	134	2	FBgn0034712	CG3264
2R	18097726	18098098	373	2	FBgn0034712	CG3264
2R	18098490	18099103	614	9	FBgn0034713	CG11291
2R	18099705	18100499	795	11	FBgn0025186,FBgn0034713	ari2,CG11291
2R	18101149	18101149	1	1	FBgn0025186	ari2
2R	18101300	18101300	1	1	FBgn0025186	ari2
2R	18101481	18101608	128	5	FBgn0025186	ari2
2R	18102321	18102321	1	1	FBgn0025186	ari2
2R	18108182	18108183	2	2	FBgn0050277	Oatp58Da
2R	18108282	18108387	106	2	FBgn0050277	Oatp58Da
2R	18116235	18116235	1	1
2R	18117701	18117829	129	3
2R	18123494	18123494	1	1
2R	18125593	18134687	9095	28	FBgn0020307	dve
2R	18136525	18136721	197	2	FBgn0020307	dve
2R	18138003	18138452	450	2	FBgn0020307	dve
2R	18142614	18142636	23	2	FBgn0020307	dve
2R	18143035	18143046	12	3	FBgn0020307	dve
2R	18153802	18153802	1	1	FBgn0020307	dve
2R	18157534	18157534	1	1	FBgn0020307	dve
2R	18159550	18159552	3	2	FBgn0020307	dve
2R	18160770	18160770	1	1	FBgn0020307	dve
2R	18165129	18165161	33	3	FBgn0020307	dve
2R	18172993	18172993	1	1	FBgn0020307	dve
2R	18175209	18175209	1	1
2R	18177475	18177475	1	1
2R	18179676	18179676	1	1	FBgn0263341	CR43422
2R	18181680	18182433	754	9	FBgn0034717	CG5819
2R	18184348	18184348	1	1	FBgn0034717	CG5819
2R	18184513	18184513	1	1
2R	18184631	18184631	1	1
2R	18188502	18188502	1	1	FBgn0034718	wdp
2R	18194946	18194946	1	1	FBgn0034718	wdp
2R	18197035	18197035	1	1	FBgn0034718	wdp
2R	18200785	18200786	2	2	FBgn0265979	CR44758
2R	18204530	18204530	1	1
2R	18205092	18205118	27	2
2R	18211033	18211370	338	3	FBgn0013272	Gp150
2R	18211964	18211964	1	1	FBgn0013272	Gp150
2R	18212240	18212836	597	3	FBgn0013272	Gp150
2R	18213860	18213860	1	1	FBgn0013272	Gp150
2R	18219170	18219214	45	5	FBgn0016053,FBgn0017482	pgc,T3dh
2R	18219324	18219326	3	1	FBgn0016053	pgc
2R	18219325	18219325	1	1	FBgn0017482	T3dh
2R	18226056	18226056	1	1	FBgn0034720	Lipringamma
2R	18226386	18226386	1	1	FBgn0034720	Lipringamma
2R	18228247	18228247	1	1	FBgn0034720	Lipringamma
2R	18232768	18232768	1	1	FBgn0034720	Lipringamma
2R	18260884	18260884	1	1
2R	18272754	18272754	1	1	FBgn0034723	CG13506
2R	18274570	18274570	1	1	FBgn0034723	CG13506
2R	18279799	18279799	1	1	FBgn0034723	CG13506
2R	18282546	18282546	1	1	FBgn0034724	babos
2R	18282835	18282967	133	10	FBgn0034724	babos
2R	18285098	18285098	1	1	FBgn0034724	babos
2R	18287993	18288656	664	5	FBgn0034724	babos
2R	18289660	18289982	323	3
2R	18292954	18292978	25	2	FBgn0034725	CG6044
2R	18294170	18294170	1	1	FBgn0034725	CG6044
2R	18298582	18298582	1	1	FBgn0022984	qkr58E3
2R	18312450	18312450	1	1	FBgn0034728	rad50
2R	18320697	18320699	3	2
2R	18322919	18322919	1	1
2R	18328153	18328814	662	6
2R	18329413	18329550	138	2
2R	18330981	18330981	1	1
2R	18332307	18333355	1049	4
2R	18333773	18333798	26	3
2R	18334091	18334091	1	1
2R	18335658	18335664	7	2
2R	18336891	18336891	1	1
2R	18337382	18337472	91	3
2R	18340748	18340749	2	2
2R	18346101	18346101	1	1	FBgn0034731	CG10384
2R	18346664	18346664	1	1	FBgn0034731	CG10384
2R	18363862	18364054	193	7	FBgn0266433	CG45063
2R	18368143	18368143	1	1	FBgn0034733	CG4752
2R	18375938	18378012	2075	8	FBgn0034734	CG4554
2R	18386444	18386444	1	1	FBgn0003175	px
2R	18387541	18387541	1	1	FBgn0003175	px
2R	18394279	18394279	1	1	FBgn0003175	px
2R	18403102	18403102	1	1	FBgn0003175	px
2R	18403604	18403604	1	1	FBgn0003175	px
2R	18403977	18404455	479	6	FBgn0003175	px
2R	18410574	18410574	1	1	FBgn0003175	px
2R	18410670	18411561	892	3	FBgn0003175	px
2R	18413163	18413168	6	2	FBgn0003175	px
2R	18417293	18417293	1	1	FBgn0003175	px
2R	18421959	18421959	1	1	FBgn0003175	px
2R	18422666	18422666	1	1	FBgn0003175	px
2R	18447198	18447200	3	2	FBgn0003175	px
2R	18447962	18448001	40	3	FBgn0003175	px
2R	18449650	18449656	7	3
2R	18449704	18449714	11	2
2R	18449929	18449929	1	1	FBgn0034737	CG11362
2R	18455779	18455851	73	2	FBgn0260866	dnr1
2R	18456756	18456756	1	1	FBgn0260866	dnr1
2R	18457299	18457299	1	1	FBgn0260866	dnr1
2R	18459170	18459170	1	1	FBgn0260866	dnr1
2R	18459936	18459979	44	6	FBgn0260866	dnr1
2R	18461169	18462181	1013	4	FBgn0260866	dnr1
2R	18462889	18462889	1	1	FBgn0260866	dnr1
2R	18463973	18463973	1	1	FBgn0260866	dnr1
2R	18465847	18465847	1	1	FBgn0260866	dnr1
2R	18467677	18467678	2	2	FBgn0260866	dnr1
2R	18476824	18476824	1	1	FBgn0260866	dnr1
2R	18476883	18476907	25	3	FBgn0260866	dnr1
2R	18483647	18483647	1	1	FBgn0034739	CG3927
2R	18490004	18490004	1	1	FBgn0034742	CG4294
2R	18493314	18493314	1	1	FBgn0034743	RpS16
2R	18501649	18501649	1	1
2R	18507070	18507070	1	1	FBgn0053143	CG33143
2R	18508185	18508185	1	1	FBgn0053143	CG33143
2R	18508440	18508440	1	1	FBgn0053143	CG33143
2R	18515155	18515155	1	1	FBgn0053143	CG33143
2R	18515873	18515873	1	1	FBgn0053143	CG33143
2R	18518495	18518495	1	1	FBgn0053143	CG33143
2R	18520541	18520557	17	2	FBgn0053143	CG33143
2R	18546322	18546324	3	1	FBgn0034759,FBgn0260767	CG13511,CG42565
2R	18546323	18546323	1	1	FBgn0034758	CG13510
2R	18564064	18564064	1	1
2R	18569724	18569724	1	1
2R	18577489	18577489	1	1	FBgn0265984	CR44763
2R	18678941	18689911	10971	18	FBgn0011211,FBgn0259145	blw,CG42260
2R	18697476	18707311	9836	24	FBgn0050271,FBgn0086408	CG30271,stl
2R	18715443	18716009	567	7	FBgn0050274,FBgn0259179	CG30274,CG42284
2R	18716618	18719131	2514	4	FBgn0050272	CG30272
2R	18719931	18720316	386	12	FBgn0050265	CG30265
2R	18721704	18721704	1	1	FBgn0050265	CG30265
2R	18722436	18722436	1	1	FBgn0034782	CG12490
2R	18723500	18723941	442	7	FBgn0034782	CG12490
2R	18724427	18724427	1	1
2R	18724467	18724481	15	2
2R	18724935	18724935	1	1	FBgn0034783	CG9825
2R	18726841	18726950	110	6
2R	18732909	18737057	4149	24	FBgn0034785,FBgn0034786	CG3649,CG13531
2R	18746652	18746652	1	1
2R	18750111	18750111	1	1
2R	18752317	18752317	1	1
2R	18753028	18753028	1	1
2R	18754035	18754035	1	1
2R	18760931	18760931	1	1	FBgn0034788	CG13532
2R	18762251	18762251	1	1	FBgn0267025	CR45469
2R	18765485	18765485	1	1	FBgn0034789	PIP5K59B
2R	18766975	18767823	849	7	FBgn0034789	PIP5K59B
2R	18770530	18770530	1	1	FBgn0034792	CG3499
2R	18782382	18782446	65	2	FBgn0034796	CG3700
2R	18786789	18788795	2007	9	FBgn0034797	nahoda
2R	18789622	18791266	1645	5	FBgn0034797	nahoda
2R	19607726	19607726	1	1	FBgn0034897	Sesn
2R	19941114	19941114	1	1	FBgn0034965	ppk29
3L	21580	21692	113	2
3L	35268	35268	1	1
3L	97094	97094	1	1
3L	122451	125494	3044	3	FBgn0266950,FBgn0266951	CR45401,CR45402
3L	316589	316589	1	1	FBgn0004373	fwd
3L	352615	352615	1	1	FBgn0261985	Ptpmeg
3L	400363	400363	1	1
3L	416800	416800	1	1
3L	422030	422688	659	3
3L	423812	423812	1	1
3L	425756	426130	375	5
3L	440068	440068	1	1	FBgn0001316	klar
3L	449187	449187	1	1	FBgn0001316	klar
3L	451685	451685	1	1	FBgn0001316	klar
3L	463010	463010	1	1	FBgn0001316	klar
3L	465721	465721	1	1	FBgn0001316	klar
3L	719026	719026	1	1
3L	731587	731587	1	1
3L	747508	748023	516	3	FBgn0035160	hng3
3L	783803	783803	1	1
3L	853937	853937	1	1	FBgn0035170	dpr20
3L	855314	855328	15	3	FBgn0035170	dpr20
3L	857508	857532	25	2
3L	916407	916407	1	1	FBgn0264574	Glut1
3L	946653	946653	1	1	FBgn0264574	Glut1
3L	985377	985377	1	1	FBgn0264574	Glut1
3L	993803	993824	22	4
3L	997045	997364	320	5	FBgn0024277	trio
3L	998387	998387	1	1	FBgn0024277	trio
3L	1012215	1012236	22	2	FBgn0024277	trio
3L	1016303	1016303	1	1	FBgn0024277	trio
3L	1020320	1020344	25	2	FBgn0024277	trio
3L	1021877	1022051	175	2	FBgn0024277	trio
3L	1028080	1028080	1	1	FBgn0024277	trio
3L	1033519	1033519	1	1	FBgn0024277	trio
3L	1056664	1056719	56	3	FBgn0004870	bab1
3L	1062686	1062686	1	1	FBgn0004870	bab1
3L	1069559	1069559	1	1	FBgn0004870	bab1
3L	1069794	1069794	1	1	FBgn0004870	bab1
3L	1081186	1081186	1	1	FBgn0004870	bab1
3L	1086910	1086910	1	1	FBgn0004870	bab1
3L	1092106	1092106	1	1	FBgn0004870	bab1
3L	1113674	1113674	1	1
3L	1119735	1119735	1	1
3L	1123085	1123085	1	1
3L	1165092	1165092	1	1	FBgn0025525	bab2
3L	1167062	1167062	1	1	FBgn0025525	bab2
3L	1174263	1174263	1	1	FBgn0025525	bab2
3L	1177533	1177533	1	1
3L	1180021	1180021	1	1
3L	1185706	1185706	1	1
3L	1200549	1200563	15	2
3L	1205260	1205262	3	2	FBgn0264272	mwh
3L	1234000	1234000	1	1	FBgn0053965	CG33965
3L	1280633	1280633	1	1	FBgn0052333	CG32333
3L	1282655	1282683	29	3	FBgn0052333	CG32333
3L	1284449	1284451	3	2	FBgn0052333	CG32333
3L	1285456	1285456	1	1	FBgn0052333	CG32333
3L	1290201	1290201	1	1	FBgn0052333	CG32333
3L	1296728	1296728	1	1	FBgn0262937	Rabex5
3L	1300252	1300252	1	1	FBgn0025682	scf
3L	1308928	1308928	1	1	FBgn0035205	CG2469
3L	1309397	1309397	1	1	FBgn0035205	CG2469
3L	1319244	1319244	1	1	FBgn0010246	Myo61F
3L	1320022	1320022	1	1	FBgn0010246	Myo61F
3L	1323353	1323355	3	1	FBgn0010246	Myo61F
3L	1323354	1323354	1	1	FBgn0266676	CR45166
3L	1323856	1323858	3	1	FBgn0010246	Myo61F
3L	1323857	1323857	1	1	FBgn0266676	CR45166
3L	1325172	1325172	1	1	FBgn0010246	Myo61F
3L	1329894	1329903	10	2
3L	1330708	1330708	1	1	FBgn0011361	mtacp1
3L	1366434	1366434	1	1	FBgn0003138	Ptp61F
3L	1367220	1367220	1	1	FBgn0003138	Ptp61F
3L	1373676	1373678	3	1	FBgn0003138	Ptp61F
3L	1373677	1373677	1	1	FBgn0003295	ru
3L	1376262	1376264	3	1	FBgn0003138	Ptp61F
3L	1376263	1376263	1	1	FBgn0003295	ru
3L	1388093	1388093	1	1	FBgn0003138	Ptp61F
3L	1391354	1391395	42	3	FBgn0003138	Ptp61F
3L	1395498	1395498	1	1	FBgn0003138	Ptp61F
3L	1405126	1405126	1	1	FBgn0003138	Ptp61F
3L	1405495	1406301	807	3	FBgn0003138	Ptp61F
3L	1413068	1413070	3	1	FBgn0003138	Ptp61F
3L	1413069	1413069	1	1	FBgn0035216	CG9168
3L	1415434	1415434	1	1	FBgn0003138	Ptp61F
3L	1417007	1417432	426	6	FBgn0003138,FBgn0035217	Ptp61F,FucTD
3L	1434491	1434752	262	3	FBgn0003138,FBgn0043865	Ptp61F,SA2
3L	1435460	1435462	3	1	FBgn0003138	Ptp61F
3L	1435461	1435461	1	1	FBgn0043865	SA2
3L	1438709	1438709	1	1	FBgn0003138	Ptp61F
3L	1447527	1447535	9	2	FBgn0003138	Ptp61F
3L	1449136	1449268	133	3	FBgn0003138	Ptp61F
3L	1449652	1449652	1	1	FBgn0003138	Ptp61F
3L	1450511	1450511	1	1	FBgn0003138	Ptp61F
3L	1451508	1451508	1	1	FBgn0003138	Ptp61F
3L	1452464	1452859	396	7	FBgn0003138	Ptp61F
3L	1453174	1453174	1	1	FBgn0003138	Ptp61F
3L	1453444	1453444	1	1	FBgn0003138	Ptp61F
3L	1457328	1457328	1	1	FBgn0003138	Ptp61F
3L	1465129	1465131	3	1	FBgn0003138	Ptp61F
3L	1465130	1465130	1	1	FBgn0004635	rho
3L	1469903	1469903	1	1	FBgn0003138	Ptp61F
3L	1470118	1470118	1	1	FBgn0003138	Ptp61F
3L	1475415	1475415	1	1
3L	1480665	1480665	1	1	FBgn0020248	stet
3L	1482609	1482609	1	1	FBgn0020248	stet
3L	1482918	1482918	1	1	FBgn0020248	stet
3L	1483447	1483447	1	1	FBgn0020248	stet
3L	1483737	1484163	427	3	FBgn0020248	stet
3L	1484357	1485190	834	3	FBgn0020248	stet
3L	1487357	1487357	1	1	FBgn0020248	stet
3L	1487665	1487665	1	1	FBgn0020248	stet
3L	1488195	1488237	43	3	FBgn0020248	stet
3L	1488528	1488622	95	7	FBgn0020248	stet
3L	1488940	1488942	3	2	FBgn0020248,FBgn0086670	stet,snoRNA:Psi28S2622
3L	1489934	1489934	1	1
3L	1490918	1490918	1	1
3L	1491889	1491889	1	1	FBgn0043458	CG12084
3L	1493208	1493297	90	3	FBgn0043458	CG12084
3L	1493487	1493529	43	2	FBgn0043458	CG12084
3L	1494135	1494934	800	3	FBgn0043458	CG12084
3L	1495493	1495498	6	2	FBgn0043458	CG12084
3L	1498553	1498842	290	3	FBgn0028577	pUf68
3L	1499098	1499098	1	1	FBgn0028577	pUf68
3L	1500170	1501018	849	6	FBgn0028577	pUf68
3L	1503978	1503980	3	1	FBgn0011204	cue
3L	1503979	1503979	1	1	FBgn0261243	Psa
3L	1506004	1513819	7816	3	FBgn0011204,FBgn0261243	cue,Psa
3L	1514235	1514258	24	3	FBgn0011204,FBgn0261243	cue,Psa
3L	1514530	1514819	290	3	FBgn0011204,FBgn0261243	cue,Psa
3L	1515608	1515610	3	1	FBgn0011204	cue
3L	1515609	1515609	1	1	FBgn0261243	Psa
3L	1515643	1515668	26	2	FBgn0011204,FBgn0261243	cue,Psa
3L	1515818	1516240	423	4	FBgn0011204,FBgn0261243	cue,Psa
3L	1516706	1516708	3	1	FBgn0011204	cue
3L	1516707	1516707	1	1	FBgn0261243	Psa
3L	1519604	1519605	2	2	FBgn0261243	Psa
3L	1520838	1520838	1	1	FBgn0261243	Psa
3L	1522386	1522672	287	8	FBgn0261243	Psa
3L	1523532	1523532	1	1	FBgn0035227	CG12090
3L	1524405	1524405	1	1	FBgn0035227	CG12090
3L	1526000	1526104	105	6	FBgn0035227	CG12090
3L	1528118	1528118	1	1	FBgn0035227	CG12090
3L	1530684	1530704	21	2	FBgn0035227,FBgn0053971	CG12090,Ir62a
3L	1531013	1531015	3	1	FBgn0035227	CG12090
3L	1531014	1531014	1	1	FBgn0053971	Ir62a
3L	1533457	1533656	200	4	FBgn0035227	CG12090
3L	1539137	1539137	1	1	FBgn0035229	CG7852
3L	1542937	1542937	1	1	FBgn0035229	CG7852
3L	1543958	1543958	1	1	FBgn0035229	CG7852
3L	1547555	1547555	1	1	FBgn0041342	Cct1
3L	1547595	1547625	31	2	FBgn0041342	Cct1
3L	1547887	1547913	27	2	FBgn0041342	Cct1
3L	1547925	1547925	1	1	FBgn0041342	Cct1
3L	1548745	1548751	7	2	FBgn0041342	Cct1
3L	1551348	1551348	1	1	FBgn0041342	Cct1
3L	1551819	1551819	1	1	FBgn0041342	Cct1
3L	1553466	1553466	1	1	FBgn0041342	Cct1
3L	1570521	1570521	1	1	FBgn0035236	CG12004
3L	1583042	1583042	1	1	FBgn0035237	CG13917
3L	1585898	1585898	1	1	FBgn0035237	CG13917
3L	1586444	1586444	1	1	FBgn0035237	CG13917
3L	1590239	1590239	1	1	FBgn0035237	CG13917
3L	1610498	1611033	536	3	FBgn0035239,FBgn0035240,FBgn0035241	CG18170,CG33791,CG12105
3L	1613014	1613076	63	3	FBgn0035239,FBgn0035240,FBgn0035241	CG18170,CG33791,CG12105
3L	1613116	1613429	314	8	FBgn0035239,FBgn0035240,FBgn0035241	CG18170,CG33791,CG12105
3L	1617164	1617481	318	3	FBgn0035239,FBgn0035240,FBgn0035243	CG18170,CG33791,CG13926
3L	1619423	1619425	3	1	FBgn0035244	ABCB7
3L	1619424	1619424	1	1	FBgn0053230	CG33230
3L	1619619	1619621	3	1	FBgn0035244	ABCB7
3L	1619620	1619620	1	1	FBgn0053230	CG33230
3L	1620183	1620185	3	1	FBgn0035244	ABCB7
3L	1620184	1620184	1	1	FBgn0053230	CG33230
3L	1621217	1621217	1	1	FBgn0035244	ABCB7
3L	1621633	1621633	1	1	FBgn0035244	ABCB7
3L	1623267	1623269	3	1	FBgn0035244	ABCB7
3L	1623268	1623268	1	1	FBgn0035245	GC
3L	1624377	1625107	731	4	FBgn0035245	GC
3L	1628440	1628588	149	4	FBgn0035245	GC
3L	1629717	1629717	1	1
3L	1630570	1630570	1	1	FBgn0013342	nSyb
3L	1631119	1631119	1	1	FBgn0013342	nSyb
3L	1639471	1639492	22	2
3L	1642730	1642730	1	1	FBgn0025725	alphaCOP
3L	1643066	1643066	1	1	FBgn0025725	alphaCOP
3L	1647680	1647680	1	1
3L	1648725	1648725	1	1	FBgn0025712	CG13920
3L	1649879	1649879	1	1	FBgn0025712	CG13920
3L	1650297	1650297	1	1	FBgn0025712	CG13920
3L	1650309	1650309	1	1	FBgn0025712	CG13920
3L	1652965	1652976	12	2
3L	1653270	1653270	1	1	FBgn0035252	CG7970
3L	1657138	1657138	1	1	FBgn0035253	CG7971
3L	1657867	1657896	30	3	FBgn0035253	CG7971
3L	1657966	1657987	22	2	FBgn0035253	CG7971
3L	1658489	1658491	3	2	FBgn0035253	CG7971
3L	1658500	1658512	13	3	FBgn0035253	CG7971
3L	1658723	1658796	74	3	FBgn0035253	CG7971
3L	1659156	1659156	1	1	FBgn0035253	CG7971
3L	1660787	1661181	395	4	FBgn0035253	CG7971
3L	1668333	1668333	1	1	FBgn0026372	RpL23A
3L	1669594	1669594	1	1	FBgn0035255	RabX5
3L	1670311	1670311	1	1
3L	1671429	1672494	1066	2	FBgn0035256	CG13930
3L	1672719	1672719	1	1	FBgn0035256	CG13930
3L	1673307	1673307	1	1
3L	1674205	1674207	3	2
3L	1675841	1675841	1	1	FBgn0035260	CG7991
3L	1676180	1676180	1	1	FBgn0035260	CG7991
3L	1677434	1677434	1	1	FBgn0035260	CG7991
3L	1678791	1678791	1	1	FBgn0035260	CG7991
3L	1678922	1678922	1	1	FBgn0035260	CG7991
3L	1680416	1680440	25	2	FBgn0035260	CG7991
3L	1680601	1680601	1	1	FBgn0035260	CG7991
3L	1680648	1680748	101	6	FBgn0035260	CG7991
3L	1680824	1680824	1	1	FBgn0035260	CG7991
3L	1681046	1681046	1	1	FBgn0035260	CG7991
3L	1681928	1681928	1	1	FBgn0035260	CG7991
3L	1682047	1682120	74	3	FBgn0035260	CG7991
3L	1682206	1682225	20	3	FBgn0035260	CG7991
3L	1683144	1683280	137	3	FBgn0035260	CG7991
3L	1688306	1688306	1	1	FBgn0035260	CG7991
3L	1688362	1688362	1	1	FBgn0035260	CG7991
3L	1688569	1688646	78	2	FBgn0035260	CG7991
3L	1689181	1689314	134	2	FBgn0035260	CG7991
3L	1689732	1689732	1	1	FBgn0035260	CG7991
3L	1691741	1691762	22	2	FBgn0035260	CG7991
3L	1693396	1693409	14	2	FBgn0035260	CG7991
3L	1701885	1701978	94	4	FBgn0035258,FBgn0035260	CG13931,CG7991
3L	1702734	1703216	483	4	FBgn0035260	CG7991
3L	1704122	1704478	357	5	FBgn0035260	CG7991
3L	1704819	1704819	1	1	FBgn0035260	CG7991
3L	1708007	1708029	23	2	FBgn0035260	CG7991
3L	1708828	1708828	1	1	FBgn0035260	CG7991
3L	1708889	1709337	449	4	FBgn0035260	CG7991
3L	1710713	1711328	616	14	FBgn0035260	CG7991
3L	1711382	1711390	9	2	FBgn0035260	CG7991
3L	1711457	1715765	4309	18	FBgn0027594,FBgn0035260	drpr,CG7991
3L	1717357	1718230	874	2	FBgn0027594	drpr
3L	1718330	1718330	1	1	FBgn0027594	drpr
3L	1718447	1718447	1	1	FBgn0027594	drpr
3L	1718548	1718548	1	1	FBgn0027594	drpr
3L	1718694	1718694	1	1	FBgn0027594	drpr
3L	1720564	1720564	1	1	FBgn0027594	drpr
3L	1720627	1720629	3	1	FBgn0027594	drpr
3L	1720628	1720628	1	1	FBgn0035262	CG18171
3L	1721846	1721848	3	1	FBgn0027594	drpr
3L	1721847	1721847	1	1	FBgn0035262	CG18171
3L	1723290	1723744	455	4	FBgn0027594	drpr
3L	1724172	1724272	101	4	FBgn0027594	drpr
3L	1725389	1725391	3	1	FBgn0027594	drpr
3L	1725390	1725390	1	1	FBgn0035263	CG12035
3L	1725740	1725740	1	1	FBgn0027594	drpr
3L	1726727	1727047	321	4	FBgn0027594	drpr
3L	1727765	1727765	1	1	FBgn0027594	drpr
3L	1727953	1728161	209	6	FBgn0027594	drpr
3L	1728426	1728426	1	1	FBgn0027594	drpr
3L	1728679	1729023	345	6	FBgn0027594	drpr
3L	1729131	1729131	1	1	FBgn0027594	drpr
3L	1729225	1729568	344	3	FBgn0027594	drpr
3L	1730048	1730395	348	7	FBgn0027594	drpr
3L	1731275	1735248	3974	17	FBgn0035264	Oseg4
3L	1737993	1737993	1	1	FBgn0035265	CG18173
3L	1738256	1738256	1	1
3L	1740248	1740248	1	1	FBgn0035266	Gk
3L	1740344	1740344	1	1	FBgn0035266	Gk
3L	1741404	1741404	1	1	FBgn0035266	Gk
3L	1743900	1743900	1	1	FBgn0035266	Gk
3L	1745810	1745827	18	2
3L	1746728	1746729	2	2
3L	1748105	1748105	1	1	FBgn0035267	CG13921
3L	1754763	1754763	1	1	FBgn0022702	Cht2
3L	1755600	1755600	1	1	FBgn0022702	Cht2
3L	1758852	1760009	1158	6	FBgn0013811,FBgn0035268	Dhc62B,CG8001
3L	1765327	1765327	1	1	FBgn0013811	Dhc62B
3L	1769746	1771930	2185	9	FBgn0013811,FBgn0035270	Dhc62B,CG13933
3L	1773381	1773391	11	2	FBgn0035270	CG13933
3L	1775250	1776996	1747	5	FBgn0027903	CG12018
3L	1778505	1778505	1	1	FBgn0250789	alphaSpec
3L	1780196	1780331	136	2	FBgn0250789	alphaSpec
3L	1780766	1780766	1	1	FBgn0250789	alphaSpec
3L	1784026	1784475	450	5	FBgn0250789	alphaSpec
3L	1786854	1787070	217	2	FBgn0250789	alphaSpec
3L	1791205	1792555	1351	7	FBgn0024510,FBgn0250789	dlt,alphaSpec
3L	1798863	1798863	1	1	FBgn0067864	Patj
3L	1832733	1832733	1	1	FBgn0035280	Cpr62Bb
3L	1918947	1918947	1	1
3L	1996498	1996498	1	1
3L	2107251	2107251	1	1	FBgn0086906	sls
3L	2125987	2126810	824	6	FBgn0052311	zormin
3L	2129448	2129448	1	1	FBgn0052311	zormin
3L	2135445	2135445	1	1	FBgn0052311	zormin
3L	2135784	2135784	1	1	FBgn0052311	zormin
3L	2140037	2140037	1	1	FBgn0052311	zormin
3L	2143568	2143568	1	1	FBgn0052311	zormin
3L	2153903	2153903	1	1	FBgn0035308	CG15822
3L	2157063	2157277	215	6	FBgn0035308	CG15822
3L	2179896	2179896	1	1
3L	2509395	2510010	616	5	FBgn0010905	Spn
3L	2512717	2512717	1	1	FBgn0010905	Spn
3L	2513370	2513684	315	5	FBgn0010905	Spn
3L	2518675	2518675	1	1	FBgn0010905	Spn
3L	2520372	2520372	1	1	FBgn0010905	Spn
3L	2524631	2524697	67	3	FBgn0010905	Spn
3L	2530345	2530345	1	1	FBgn0010905	Spn
3L	2531254	2531318	65	7	FBgn0010905	Spn
3L	2536995	2537021	27	2	FBgn0010905	Spn
3L	2538641	2538641	1	1	FBgn0010905	Spn
3L	2540794	2540794	1	1	FBgn0010905	Spn
3L	2544135	2544925	791	6	FBgn0010905	Spn
3L	2547735	2547735	1	1	FBgn0010905	Spn
3L	2553646	2553646	1	1	FBgn0010905	Spn
3L	2557551	2557880	330	12	FBgn0010909	msn
3L	2559109	2562673	3565	9	FBgn0010909	msn
3L	2567650	2569487	1838	10	FBgn0010909	msn
3L	2569512	2569512	1	1	FBgn0010909	msn
3L	2570431	2570639	209	6	FBgn0010909	msn
3L	2571405	2572413	1009	7	FBgn0010909	msn
3L	2573148	2573148	1	1	FBgn0010909	msn
3L	2574240	2574329	90	4	FBgn0010909	msn
3L	2574547	2576180	1634	6	FBgn0010909	msn
3L	2577599	2579147	1549	13	FBgn0010909	msn
3L	2628959	2628966	8	3	FBgn0011828	Pxn
3L	2630834	2630834	1	1
3L	2632023	2632025	3	1	FBgn0250911	CG42245
3L	2632024	2632024	1	1	FBgn0035357	MEP
3L	2635599	2635888	290	3	FBgn0035357,FBgn0250911	MEP,CG42245
3L	2636338	2636340	3	1	FBgn0250911	CG42245
3L	2636339	2636339	1	1	FBgn0035357	MEP
3L	2645611	2645611	1	1	FBgn0035359	CG1143
3L	2648019	2648019	1	1
3L	2649216	2651313	2098	20	FBgn0027082,FBgn0035360	Aatspro,CG1246
3L	2651826	2651856	31	2	FBgn0027082	Aatspro
3L	2652473	2652475	3	1	FBgn0259200	CG42304
3L	2652474	2652474	1	1	FBgn0259199	Snup
3L	2653596	2654896	1301	7	FBgn0259199,FBgn0259200	Snup,CG42304
3L	2657748	2661276	3529	20	FBgn0053233,FBgn0264606	CG33233,Fife
3L	2661368	2661511	144	2	FBgn0053233,FBgn0264606	CG33233,Fife
3L	2661754	2663499	1746	21	FBgn0053234,FBgn0264606	CG33234,Fife
3L	2664228	2668595	4368	20	FBgn0264606	Fife
3L	2672952	2672952	1	1	FBgn0264606	Fife
3L	2673321	2674287	967	5	FBgn0264606	Fife
3L	2678306	2683079	4774	21	FBgn0264606	Fife
3L	2683228	2684163	936	3	FBgn0264606	Fife
3L	2684779	2684779	1	1	FBgn0264606	Fife
3L	2684980	2684980	1	1	FBgn0264606	Fife
3L	2685168	2685216	49	3	FBgn0264606	Fife
3L	2685394	2685435	42	2	FBgn0264606	Fife
3L	2685570	2685570	1	1	FBgn0264606	Fife
3L	2686339	2686339	1	1	FBgn0264606	Fife
3L	2688528	2688528	1	1	FBgn0264606	Fife
3L	2690024	2690172	149	2	FBgn0264606	Fife
3L	3333373	3333452	80	2	FBgn0035440	CG14969
3L	3334539	3339689	5151	10	FBgn0004167,FBgn0035440,FBgn0052268,FBgn0052274	kst,CG14969,Drsl6,Drsl1
3L	3342361	3342361	1	1	FBgn0004167	kst
3L	3343543	3344358	816	8	FBgn0004167	kst
3L	3345007	3345951	945	7	FBgn0004167	kst
3L	3346308	3350287	3980	21	FBgn0004167	kst
3L	3351184	3351271	88	2	FBgn0004167	kst
3L	3351842	3352646	805	5	FBgn0004167	kst
3L	3353112	3353113	2	2	FBgn0004167	kst
3L	3353259	3354229	971	3	FBgn0004167	kst
3L	3364155	3365544	1390	2	FBgn0004167	kst
3L	3379584	3386718	7135	12	FBgn0035445	CG12014
3L	3388120	3388982	863	4
3L	3397412	3400799	3388	7
3L	3408148	3408148	1	1	FBgn0014388	sty
3L	3408997	3411718	2722	2	FBgn0014388	sty
3L	3413704	3415863	2160	11	FBgn0014388	sty
3L	3416375	3418782	2408	12	FBgn0014388	sty
3L	3420548	3421268	721	3	FBgn0014388	sty
3L	3422111	3422111	1	1	FBgn0014388	sty
3L	4685624	4685922	299	5	FBgn0262870	axo
3L	4687508	4687512	5	3
3L	4983761	4983844	84	4	FBgn0005775	Con
3L	4989621	4989621	1	1	FBgn0005775	Con
3L	4990149	4990149	1	1	FBgn0005775	Con
3L	5013432	5013432	1	1	FBgn0005775	Con
3L	5191482	5197600	6119	8	FBgn0052423	shep
3L	5205050	5215905	10856	51	FBgn0052423	shep
3L	5216243	5216845	603	6	FBgn0052423	shep
3L	5216928	5217066	139	5	FBgn0052423	shep
3L	5220485	5220485	1	1	FBgn0052423	shep
3L	5224153	5225480	1328	5	FBgn0052423	shep
3L	5226046	5226046	1	1	FBgn0052423	shep
3L	5228311	5228435	125	2	FBgn0035598,FBgn0052423	CG4669,shep
3L	5229142	5232971	3830	10	FBgn0035598,FBgn0052423	CG4669,shep
3L	5234995	5238938	3944	7	FBgn0052423	shep
3L	5240176	5243018	2843	18	FBgn0052423	shep
3L	5244357	5244635	279	4	FBgn0052423	shep
3L	5245177	5245177	1	1	FBgn0052423	shep
3L	5245581	5246706	1126	3	FBgn0052423	shep
3L	5248187	5248257	71	4	FBgn0052423	shep
3L	5248492	5248492	1	1	FBgn0052423	shep
3L	5248653	5248653	1	1	FBgn0052423	shep
3L	5251592	5251592	1	1	FBgn0052423	shep
3L	5251894	5251937	44	2	FBgn0052423	shep
3L	5255664	5255734	71	2	FBgn0052423	shep
3L	5259411	5259411	1	1	FBgn0052423	shep
3L	5261452	5261452	1	1	FBgn0052423	shep
3L	5315623	5315623	1	1
3L	5331955	5331967	13	5
3L	5340357	5340755	399	7	FBgn0016031	lama
3L	5353640	5354815	1176	5	FBgn0035600	CG4769
3L	5363556	5363556	1	1
3L	5364568	5364964	397	2	FBgn0265709	CR44516
3L	5371287	5371585	299	6	FBgn0267307	CR45743
3L	5371871	5371871	1	1
3L	5371946	5372128	183	4	FBgn0035604	Ir64a
3L	5373334	5374147	814	6	FBgn0035604	Ir64a
3L	5378671	5378671	1	1
3L	5379739	5379739	1	1
3L	5380854	5382509	1656	7
3L	5383401	5383779	379	3
3L	5383949	5383949	1	1
3L	5384585	5384585	1	1
3L	5385628	5385628	1	1
3L	5386086	5386608	523	3
3L	5389626	5389757	132	5
3L	5395009	5395009	1	1
3L	5395631	5395631	1	1
3L	5396550	5396550	1	1
3L	5396792	5396792	1	1
3L	5417743	5417743	1	1	FBgn0085420	CG34391
3L	5437201	5440955	3755	13
3L	5443111	5444554	1444	3
3L	5448030	5448030	1	1
3L	5460298	5460623	326	2
3L	5462062	5462062	1	1
3L	5465603	5465603	1	1
3L	5467350	5470142	2793	7
3L	5474174	5474402	229	5	FBgn0035607	CG4835
3L	5481234	5481234	1	1
3L	5481728	5481728	1	1
3L	5486054	5486054	1	1
3L	5489160	5489160	1	1
3L	5494592	5495187	596	4
3L	5506087	5507552	1466	4	FBgn0035610	Lkr
3L	5511208	5511572	365	2	FBgn0035610	Lkr
3L	5515067	5517457	2391	3	FBgn0035610	Lkr
3L	5518200	5518200	1	1	FBgn0035610	Lkr
3L	5518621	5519392	772	11	FBgn0035610	Lkr
3L	5519586	5519609	24	2	FBgn0035610	Lkr
3L	5521925	5521965	41	2	FBgn0035610	Lkr
3L	5525761	5525761	1	1
3L	5536634	5536634	1	1	FBgn0035612	CG10625
3L	5547860	5547860	1	1
3L	5633793	5633801	9	4	FBgn0035625	Blimp
3L	5865905	5865917	13	2	FBgn0035641	CG5568
3L	6906232	6906232	1	1	FBgn0041194	Prat2
3L	6915714	6915714	1	1
3L	6934674	6934674	1	1
3L	7121826	7121826	1	1
3L	7125111	7125111	1	1	FBgn0010387	Dbi
3L	7335794	7335999	206	2	FBgn0035767	CG8596
3L	7448361	7448361	1	1
3L	7452296	7452296	1	1
3L	7479823	7479823	1	1	FBgn0035789	mthl6
3L	7489462	7489542	81	6
3L	7504066	7504066	1	1
3L	7519361	7519361	1	1	FBgn0052372	ltl
3L	7519578	7519578	1	1	FBgn0052372	ltl
3L	7554843	7554843	1	1
3L	7588851	7588851	1	1	FBgn0035802	CG33275
3L	7604412	7604412	1	1	FBgn0035802	CG33275
3L	7607275	7607275	1	1	FBgn0035802	CG33275
3L	7608989	7608989	1	1	FBgn0035802	CG33275
3L	7630067	7630067	1	1	FBgn0035802	CG33275
3L	7632116	7632116	1	1	FBgn0035802	CG33275
3L	7657207	7657209	3	1	FBgn0052373,FBgn0265084	CG32373,CG44195
3L	7657208	7657208	1	1	FBgn0261788	Ank2
3L	7658086	7658088	3	1	FBgn0052373,FBgn0265084	CG32373,CG44195
3L	7658087	7658087	1	1	FBgn0261788	Ank2
3L	7661643	7661796	154	3	FBgn0052373,FBgn0261788,FBgn0265084	CG32373,Ank2,CG44195
3L	7702765	7702767	3	1	FBgn0052373	CG32373
3L	7702766	7702766	1	1	FBgn0261788	Ank2
3L	7706459	7706461	3	1	FBgn0052373	CG32373
3L	7706460	7706460	1	1	FBgn0261788	Ank2
3L	7708242	7708244	3	1	FBgn0052373	CG32373
3L	7708243	7708243	1	1	FBgn0261788	Ank2
3L	7709410	7709412	3	1	FBgn0052373	CG32373
3L	7709411	7709411	1	1	FBgn0261788	Ank2
3L	7720366	7720366	1	1	FBgn0052373	CG32373
3L	7726652	7726794	143	2	FBgn0035815,FBgn0052373	Snmp2,CG32373
3L	7743876	7743959	84	3	FBgn0052373	CG32373
3L	7762303	7762303	1	1	FBgn0023076	Clk
3L	7764785	7764848	64	4	FBgn0023076	Clk
3L	7765123	7765340	218	3	FBgn0023076	Clk
3L	7771894	7771894	1	1	FBgn0052369	CG32369
3L	7819324	7819324	1	1	FBgn0016694	Pdp1
3L	7964004	7964004	1	1	FBgn0010406	RNaseX25
3L	7979872	7979872	1	1	FBgn0011817	nmo
3L	7986792	7986792	1	1	FBgn0011817	nmo
3L	7991702	7991702	1	1	FBgn0011817	nmo
3L	7992920	7992920	1	1	FBgn0011817	nmo
3L	7996346	7996346	1	1	FBgn0011817	nmo
3L	8018164	8018171	8	2	FBgn0011817	nmo
3L	8032753	8032753	1	1	FBgn0011817	nmo
3L	8039182	8039184	3	2	FBgn0011817	nmo
3L	8055355	8055355	1	1
3L	8061257	8061441	185	4	FBgn0052363,FBgn0262579	tRNA:CR32363,Ect4
3L	8062913	8062915	3	1	FBgn0262579	Ect4
3L	8062914	8062914	1	1	FBgn0260968	CG42591
3L	8071667	8071668	2	2	FBgn0262579	Ect4
3L	8072278	8072355	78	2	FBgn0262579	Ect4
3L	8083861	8083863	3	1	FBgn0262579	Ect4
3L	8083862	8083862	1	1	FBgn0035833	CG7565
3L	8086293	8086293	1	1	FBgn0262579	Ect4
3L	8092277	8092504	228	2	FBgn0262579	Ect4
3L	8093144	8093144	1	1	FBgn0262579	Ect4
3L	8097994	8100096	2103	5	FBgn0262579	Ect4
3L	8110306	8110306	1	1	FBgn0026252	msk
3L	8572671	8572671	1	1	FBgn0262508	CG43078
3L	9169719	9169719	1	1	FBgn0004244	Rdl
3L	9216216	9216216	1	1
3L	9255914	9255948	35	2	FBgn0264000	GluRIB
3L	9259846	9259846	1	1	FBgn0264000	GluRIB
3L	9259880	9259880	1	1	FBgn0264000	GluRIB
3L	9261849	9261849	1	1	FBgn0264000	GluRIB
3L	9271771	9271771	1	1	FBgn0264000	GluRIB
3L	9275426	9275426	1	1	FBgn0264000	GluRIB
3L	9275446	9275446	1	1	FBgn0264000	GluRIB
3L	9275486	9275486	1	1	FBgn0264000	GluRIB
3L	9275534	9275571	38	2	FBgn0264000	GluRIB
3L	9277134	9277134	1	1	FBgn0264000	GluRIB
3L	9281398	9281398	1	1	FBgn0264000	GluRIB
3L	9287291	9287291	1	1
3L	9290661	9290661	1	1
3L	9294646	9297157	2512	9
3L	9303480	9303480	1	1
3L	9306660	9306660	1	1
3L	9318549	9318549	1	1
3L	9331757	9331758	2	2
3L	9342627	9342627	1	1
3L	9343256	9343256	1	1	FBgn0035977	PGRPLF
3L	9345511	9345511	1	1	FBgn0035978	UGP
3L	9354072	9354072	1	1	FBgn0085484	CG34455
3L	9356456	9356456	1	1	FBgn0004379	Klp67A
3L	9360185	9360278	94	4
3L	9364318	9364318	1	1	FBgn0011769	Fdxh
3L	9365816	9366555	740	10	FBgn0001223,FBgn0001228	Hsp22,Hsp67Bb
3L	9367249	9367303	55	2	FBgn0001223,FBgn0001228	Hsp22,Hsp67Bb
3L	9375485	9375485	1	1	FBgn0001224	Hsp23
3L	9384774	9389760	4987	10	FBgn0035983	CG4080
3L	9397592	9397592	1	1
3L	9465105	9465105	1	1	FBgn0266101	CG44838
3L	9475354	9475354	1	1	FBgn0036004	Jarid2
3L	9492175	9492175	1	1	FBgn0036007	path
3L	9501845	9501845	1	1	FBgn0036008	CG3408
3L	9502731	9502731	1	1
3L	9506809	9506886	78	3	FBgn0053701	CR33701
3L	9509103	9509103	1	1	FBgn0053700	CG33700
3L	9509811	9509811	1	1	FBgn0053700	CG33700
3L	9515183	9515183	1	1	FBgn0053700	CG33700
3L	9544775	9544779	5	2	FBgn0261555	CG42673
3L	9562455	9562455	1	1	FBgn0261555	CG42673
3L	9563413	9563413	1	1	FBgn0261555	CG42673
3L	9564801	9564801	1	1	FBgn0261555	CG42673
3L	9582013	9582013	1	1	FBgn0261555	CG42673
3L	9586199	9586199	1	1	FBgn0261555	CG42673
3L	9593036	9593036	1	1	FBgn0036014	CG3222
3L	9642689	9642691	3	1	FBgn0053696	CG33696
3L	9642690	9642690	1	1	FBgn0016081	fry
3L	9642835	9642837	3	1	FBgn0053696	CG33696
3L	9642836	9642836	1	1	FBgn0016081	fry
3L	9644700	9644702	3	1	FBgn0053696	CG33696
3L	9644701	9644701	1	1	FBgn0016081	fry
3L	9683653	9683653	1	1	FBgn0036030	CG6767
3L	9691049	9691049	1	1
3L	9693939	9693939	1	1	FBgn0036031	CG6761
3L	9695694	9696156	463	4	FBgn0036031	CG6761
3L	9702491	9702491	1	1	FBgn0036032	CG16711
3L	9725568	9725568	1	1	FBgn0036040	CG6749
3L	9777827	9777827	1	1	FBgn0036043	CG8177
3L	9780939	9780939	1	1
3L	9819309	9819309	1	1	FBgn0264489	CG43897
3L	9895858	9895858	1	1	FBgn0036059	nudE
3L	9897178	9897178	1	1
3L	9975890	9975890	1	1	FBgn0040823	dpr6
3L	9986124	9986124	1	1	FBgn0040823	dpr6
3L	10100282	10100282	1	1	FBgn0040823	dpr6
3L	10478190	10478190	1	1	FBgn0052062	A2bp1
3L	10515015	10515015	1	1	FBgn0052062	A2bp1
3L	10521779	10521779	1	1	FBgn0052062	A2bp1
3L	10525337	10529233	3897	8	FBgn0052062	A2bp1
3L	10531992	10531992	1	1	FBgn0052062	A2bp1
3L	10533620	10533620	1	1	FBgn0052062	A2bp1
3L	10538039	10538039	1	1	FBgn0052062	A2bp1
3L	10543408	10543493	86	3	FBgn0052062	A2bp1
3L	10546797	10548339	1543	3	FBgn0052062	A2bp1
3L	10549270	10549270	1	1	FBgn0052062	A2bp1
3L	10558862	10558862	1	1	FBgn0052062	A2bp1
3L	10561889	10561889	1	1	FBgn0052062	A2bp1
3L	10564477	10564477	1	1	FBgn0052062	A2bp1
3L	10567727	10567727	1	1	FBgn0052062	A2bp1
3L	10568123	10568211	89	2	FBgn0052062	A2bp1
3L	10569429	10569974	546	3	FBgn0052062	A2bp1
3L	10602321	10602359	39	5
3L	10643984	10644260	277	5	FBgn0052066	CG32066
3L	10716637	10716637	1	1
3L	10722159	10722159	1	1
3L	11147741	11147741	1	1	FBgn0052082	CG32082
3L	11160317	11160317	1	1	FBgn0036141	wls
3L	11162663	11162663	1	1	FBgn0036141	wls
3L	11166956	11166956	1	1	FBgn0036143	CG14142
3L	11337152	11337152	1	1
3L	11347061	11347061	1	1
3L	11347417	11347417	1	1
3L	11675310	11675310	1	1	FBgn0015828	TfIIEalpha
3L	11704290	11704290	1	1	FBgn0036198	crim
3L	11705159	11705554	396	4	FBgn0040817	CG14132
3L	11725608	11725608	1	1	FBgn0052087	CG32087
3L	11739230	11739230	1	1	FBgn0036202	CG6024
3L	11739614	11739627	14	3	FBgn0036202	CG6024
3L	11739772	11739779	8	2	FBgn0036202	CG6024
3L	11740386	11740392	7	2	FBgn0036202	CG6024
3L	11852759	11852759	1	1	FBgn0266100	CG44837
3L	12213689	12213689	1	1	FBgn0260941	app
3L	16291345	16291345	1	1
3L	16293831	16293831	1	1
3L	16311669	16311669	1	1	FBgn0042201	Nplp3
3L	16311838	16312526	689	4	FBgn0036605,FBgn0267223	CG13041,CR45663
3L	16315861	16316088	228	5
3L	16385130	16385130	1	1	FBgn0266099	CG44836
3L	21204728	21204728	1	1	FBgn0037060	CG10508
3R	5801952	5801952	1	1	FBgn0267336	Glut4EF
3R	5805136	5806766	1631	4	FBgn0267336	Glut4EF
3R	5811740	5811742	3	1	FBgn0267336	Glut4EF
3R	5811741	5811741	1	1	FBgn0037770	Art4
3R	5824875	5824875	1	1	FBgn0037772	Spn85F
3R	5845767	5845767	1	1	FBgn0053208	Mical
3R	5853949	5853949	1	1	FBgn0053208	Mical
3R	5883273	5883273	1	1
3R	5895628	5895628	1	1
3R	5912266	5912287	22	3	FBgn0266414	CR45054
3R	5915031	5915031	1	1	FBgn0266414	CR45054
3R	5937112	5937112	1	1
3R	6068826	6068826	1	1	FBgn0261928	CG42795
3R	6180356	6180356	1	1	FBgn0015396	jumu
3R	6205891	6205891	1	1
3R	6791061	6791061	1	1
3R	8935938	8935938	1	1	FBgn0038118	timeout
3R	9538375	9538375	1	1	FBgn0054044	CR34044
3R	9687258	9687258	1	1
3R	11284407	11284407	1	1	FBgn0038341	AdamTSA
3R	11307619	11309617	1999	3	FBgn0019940,FBgn0038342	Rh6,CG14870
3R	11332217	11332217	1	1
3R	11333149	11333161	13	3
3R	11402862	11402862	1	1
3R	11419349	11419349	1	1
3R	11424503	11424503	1	1
3R	11424798	11424827	30	2
3R	11424965	11424977	13	2
3R	11443998	11443998	1	1
3R	11474913	11474913	1	1
3R	11484308	11484308	1	1
3R	11498758	11498758	1	1	FBgn0053207	pxb
3R	11500747	11500926	180	3	FBgn0053207	pxb
3R	11504524	11504524	1	1	FBgn0053207	pxb
3R	11506109	11506109	1	1	FBgn0053207	pxb
3R	11518411	11518411	1	1
3R	11520914	11520964	51	2	FBgn0038353	CG5399
3R	11522539	11522539	1	1	FBgn0038353	CG5399
3R	11523910	11523910	1	1
3R	11526600	11526600	1	1
3R	11528615	11528615	1	1
3R	11536795	11536865	71	2
3R	11541332	11541332	1	1	FBgn0051294	CG31294
3R	11543338	11543380	43	2
3R	11552641	11552641	1	1
3R	11559021	11559449	429	2
3R	11560654	11560654	1	1
3R	11570542	11570542	1	1	FBgn0038355	CG4520
3R	11578724	11578724	1	1
3R	11581769	11581856	88	4
3R	11590173	11590190	18	2
3R	11593190	11593190	1	1
3R	11861031	11862152	1122	9	FBgn0003117	pnr
3R	11866988	11866988	1	1	FBgn0003117	pnr
3R	11868780	11868780	1	1
3R	11875701	11883459	7759	2	FBgn0027948,FBgn0038396	msps,CG5013
3R	11886466	11887282	817	2	FBgn0038397	CG10185
3R	11901376	11905155	3780	10	FBgn0026059,FBgn0052855	Mhcl,CG32855
3R	11912674	11912676	3	1	FBgn0038398	sxe2
3R	11912675	11912675	1	1	FBgn0026059	Mhcl
3R	11937067	11937067	1	1
3R	11942308	11942353	46	2	FBgn0003319	Sb
3R	11944927	11944927	1	1	FBgn0003319	Sb
3R	11947186	11947186	1	1	FBgn0003319	Sb
3R	11981321	11981321	1	1	FBgn0063649	CG6006
3R	12009017	12009017	1	1	FBgn0038405	CG8927
3R	12035623	12035623	1	1
3R	12035684	12035684	1	1
3R	12039641	12039648	8	3
3R	12039840	12039840	1	1
3R	12050474	12051582	1109	3	FBgn0040071	tara
3R	12144695	12144695	1	1	FBgn0040271	Sulf1
3R	12180066	12180066	1	1	FBgn0038420	CG10311
3R	12202362	12202362	1	1	FBgn0003513	ss
3R	12206238	12206533	296	4	FBgn0003513	ss
3R	12207726	12207726	1	1	FBgn0003513	ss
3R	12209847	12211707	1861	6	FBgn0003513	ss
3R	12217123	12217123	1	1	FBgn0003513	ss
3R	12217368	12217369	2	2	FBgn0003513	ss
3R	12218216	12218216	1	1	FBgn0003513	ss
3R	12222860	12222860	1	1	FBgn0003513	ss
3R	12226912	12226912	1	1	FBgn0003513	ss
3R	12647965	12647965	1	1	FBgn0000014	abdA
3R	13025951	13025951	1	1	FBgn0038492	Mur89F
3R	13030782	13030782	1	1
3R	13041740	13041740	1	1
3R	13071040	13071040	1	1	FBgn0038494	beatIIb
3R	13130148	13130148	1	1
3R	13178563	13178563	1	1	FBgn0038498	beatIIa
3R	13188857	13188857	1	1	FBgn0038498	beatIIa
3R	13189631	13189631	1	1	FBgn0038498	beatIIa
3R	13322972	13322972	1	1	FBgn0261046	Dscam3
3R	13489896	13489896	1	1	FBgn0038532	CG14322
3R	13526343	13526343	1	1	FBgn0261885	osa
3R	13560109	13560109	1	1
3R	13562168	13562168	1	1
3R	13563020	13563020	1	1	FBgn0038541	TyrRII
3R	13567875	13567875	1	1	FBgn0038541	TyrRII
3R	13572182	13572182	1	1	FBgn0038541	TyrRII
3R	13579719	13579719	1	1	FBgn0038542	TyrR
3R	13580657	13580657	1	1	FBgn0038542	TyrR
3R	13581751	13581751	1	1	FBgn0038542	TyrR
3R	13584020	13584020	1	1	FBgn0038542	TyrR
3R	13588162	13588162	1	1	FBgn0038542	TyrR
3R	13594649	13594649	1	1	FBgn0262562	CG43102
3R	13607663	13609304	1642	3	FBgn0262562	CG43102
3R	13618627	13619901	1275	3	FBgn0262562	CG43102
3R	13641352	13641352	1	1	FBgn0261649	tinc
3R	13723008	13723008	1	1	FBgn0053547	Rim
3R	13782830	13782830	1	1	FBgn0263995	cpo
3R	13786693	13786693	1	1	FBgn0263995	cpo
3R	13790309	13790309	1	1	FBgn0263995	cpo
3R	13795321	13795321	1	1	FBgn0263995	cpo
3R	14118461	14118461	1	1	FBgn0010877	l(3)05822
3R	14358910	14358912	3	2	FBgn0004652	fru
3R	15775265	15775287	23	2	FBgn0038755	Hs6st
3R	15785381	15785829	449	4	FBgn0038755	Hs6st
3R	15801059	15801061	3	1	FBgn0038755	Hs6st
3R	15801060	15801060	1	1	FBgn0051213	CG31213
3R	15814179	15814658	480	4	FBgn0038755	Hs6st
3R	15827640	15827641	2	2	FBgn0038755	Hs6st
3R	15844949	15844949	1	1	FBgn0038763	CG4433
3R	15849344	15849344	1	1	FBgn0243511	psidin
3R	15855860	15855860	1	1	FBgn0038767	trem
3R	15859433	15859480	48	3	FBgn0038768	CG4936
3R	15866226	15866226	1	1	FBgn0040571	CG17193
3R	15868189	15868206	18	2	FBgn0040571	CG17193
3R	15920276	15920276	1	1
3R	15926572	15926572	1	1
3R	15958779	15958779	1	1
3R	17766968	17766968	1	1
3R	19264202	19264202	1	1	FBgn0039078	CG4374
3R	19286706	19286706	1	1	FBgn0039078	CG4374
3R	19287425	19287425	1	1	FBgn0039078	CG4374
3R	19288345	19288345	1	1	FBgn0039078	CG4374
3R	19337926	19337926	1	1
3R	19354993	19354993	1	1	FBgn0039084	CG10175
3R	19357223	19357223	1	1
3R	19795718	19795891	174	3	FBgn0051140	CG31140
3R	19796567	19796567	1	1	FBgn0051140	CG31140
3R	19797655	19797711	57	2	FBgn0051140	CG31140
3R	19801910	19801910	1	1	FBgn0051140	CG31140
3R	19804333	19804333	1	1	FBgn0051140	CG31140
3R	19805800	19805803	4	3	FBgn0051140	CG31140
3R	19806461	19806461	1	1	FBgn0051140	CG31140
3R	19814099	19814099	1	1	FBgn0039136	CG5902
3R	19832252	19833241	990	8	FBgn0020647	KrT95D
3R	19833592	19833810	219	4	FBgn0020647	KrT95D
3R	19836636	19836695	60	2	FBgn0020647	KrT95D
3R	19852475	19853171	697	2	FBgn0020647	KrT95D
3R	19861931	19865518	3588	10	FBgn0039140,FBgn0039141	Miro,spas
3R	19865936	19865936	1	1	FBgn0039141	spas
3R	19870425	19870425	1	1	FBgn0005649	Rox8
3R	19877099	19877099	1	1	FBgn0026576	CG5991
3R	19879904	19879904	1	1
3R	19892934	19892934	1	1	FBgn0053100	4EHP
3R	19913143	19913143	1	1	FBgn0053100	4EHP
3R	19950710	19950710	1	1	FBgn0039152	Rootletin
3R	19953114	19953123	10	3	FBgn0039152	Rootletin
3R	19970510	19970584	75	3	FBgn0039155	Kal1
3R	20226832	20226832	1	1	FBgn0000036	nAChRalpha1
3R	20297916	20297916	1	1
3R	20569540	20569540	1	1	FBgn0004885	tok
3R	20569769	20570278	510	3	FBgn0004885	tok
3R	20799124	20799124	1	1
3R	20815987	20816130	144	2	FBgn0039257	tnc
3R	20835299	20835299	1	1	FBgn0039257	tnc
3R	20836002	20836061	60	3	FBgn0039257	tnc
3R	20839571	20839703	133	2	FBgn0039257	tnc
3R	20850970	20851101	132	3	FBgn0015240	Hr96
3R	20897259	20897259	1	1	FBgn0039272	CG11836
3R	20902225	20902225	1	1
3R	21282433	21282433	1	1	FBgn0004509	Fur1
3R	21379145	21379145	1	1	FBgn0011666	msi
3R	21400436	21400436	1	1	FBgn0011666	msi
3R	21569007	21569007	1	1	FBgn0066101	LpR1
3R	21679118	21679124	7	2	FBgn0039379	CG5886
3R	21766953	21766953	1	1	FBgn0039396	CCAPR
3R	21792820	21792820	1	1
3R	21973144	21973144	1	1
3R	22321998	22321998	1	1	FBgn0039431	plum
3R	22355087	22355088	2	2	FBgn0039431	plum
3R	22362371	22362371	1	1	FBgn0263289	scrib
3R	22459579	22459579	1	1	FBgn0051080	TwdlH
3R	22495932	22495932	1	1	FBgn0250908	beatVII
3R	22505894	22505894	1	1	FBgn0250908	beatVII
3R	22506758	22506758	1	1	FBgn0250908	beatVII
3R	22520451	22520451	1	1
3R	22525980	22527085	1106	2	FBgn0023179	amon
3R	22527661	22529006	1346	4	FBgn0023179	amon
3R	22530075	22530304	230	7	FBgn0023179	amon
3R	23345935	23345935	1	1
3R	23404633	23404633	1	1	FBgn0027492	wdb
3R	23411981	23412015	35	2	FBgn0040080	raps
3R	23415454	23415454	1	1	FBgn0039527	CG5639
3R	23417879	23417879	1	1	FBgn0039527	CG5639
3R	23420528	23420528	1	1	FBgn0039527	CG5639
3R	23422764	23422764	1	1
3R	23423138	23423138	1	1
3R	23427609	23427745	137	2	FBgn0039528	dsd
3R	23436834	23436843	10	2	FBgn0039530	Tusp
3R	23445474	23445474	1	1	FBgn0039530	Tusp
3R	23447396	23447396	1	1	FBgn0039530	Tusp
3R	23451621	23451623	3	1	FBgn0039530	Tusp
3R	23451622	23451622	1	1	FBgn0039529	CG5612
3R	23456335	23456335	1	1	FBgn0039530	Tusp
3R	23468679	23468679	1	1	FBgn0266579	tau
3R	25087375	25087375	1	1
3R	25688173	25688173	1	1	FBgn0039713	RpS8
3R	25703820	25703820	1	1	FBgn0051038	CG31038
3R	25719005	25719128	124	2	FBgn0051038	CG31038
3R	25725538	25725538	1	1	FBgn0051038	CG31038
3R	25729111	25729111	1	1	FBgn0039718	CG15517
3R	25732326	25732326	1	1
3R	25734489	25734489	1	1	FBgn0051036	CG31036
3R	25738410	25738476	67	2	FBgn0051036	CG31036
3R	25738732	25738732	1	1	FBgn0039722	Capa
3R	25740277	25740277	1	1	FBgn0003861	trp
3R	25743019	25743019	1	1	FBgn0003861	trp
3R	25745034	25745239	206	2	FBgn0003861	trp
3R	25746864	25746864	1	1
3R	25749125	25751857	2733	8	FBgn0003356,FBgn0003357,FBgn0003358	Jon99Cii,Jon99Ciii,Jon99Ci
3R	25761633	25764958	3326	4	FBgn0039727	CG15523
3R	25766191	25766191	1	1	FBgn0039727	CG15523
3R	25766548	25766548	1	1	FBgn0039727	CG15523
3R	25767250	25767250	1	1	FBgn0039727	CG15523
3R	25769405	25771083	1679	9	FBgn0039727	CG15523
3R	25774027	25774027	1	1
3R	25775044	25775431	388	4
3R	25777615	25777615	1	1	FBgn0004622	TkR99D
3R	25783282	25783282	1	1	FBgn0004622	TkR99D
3R	25784520	25784520	1	1	FBgn0004622	TkR99D
3R	25793244	25793244	1	1	FBgn0004622	TkR99D
3R	25795598	25795598	1	1
3R	25802669	25802669	1	1
3R	25805991	25805991	1	1
3R	25806545	25807372	828	8
3R	25809996	25810700	705	4	FBgn0039728	CG7896
3R	25811261	25811894	634	3	FBgn0039728	CG7896
3R	25819359	25821993	2635	11	FBgn0039730,FBgn0039731	CG7903,Sas6
3R	25823499	25823547	49	4
3R	25829032	25829190	159	2	FBgn0039734	Tace
3R	25841174	25841174	1	1
3R	25854268	25854268	1	1	FBgn0026597	Axn
3R	25855268	25855268	1	1	FBgn0026597	Axn
3R	25856288	25856305	18	3	FBgn0026597	Axn
3R	25863326	25867396	4071	3	FBgn0001280,FBgn0001281,FBgn0003510,FBgn0003511,FBgn0041102	janA,janB,Sryalpha,Srybeta,ocn
3R	25871588	25871791	204	3	FBgn0002626	RpL32
3R	25876773	25877022	250	2	FBgn0039742,FBgn0264838	CG15528,CR44046
3R	25877304	25877317	14	3	FBgn0039742,FBgn0264838	CG15528,CR44046
3R	25880470	25880470	1	1	FBgn0003479	spnA
3R	25881601	25885145	3545	7	FBgn0003479,FBgn0039744,FBgn0085346,FBgn0260468,FBgn0266411	spnA,CG15526,CG34317,CG7950,sima
3R	25887889	25887889	1	1	FBgn0266411	sima
3R	25888175	25889724	1550	2	FBgn0266411	sima
3R	25897018	25897263	246	3	FBgn0266411	sima
3R	25904007	25904007	1	1	FBgn0266411	sima
3R	25908175	25908175	1	1	FBgn0266411	sima
3R	25918036	25918036	1	1	FBgn0266411	sima
3R	25922063	25922063	1	1	FBgn0266411	sima
3R	25930113	25938589	8477	17	FBgn0266411	sima
3R	25940201	25941454	1254	4	FBgn0266411	sima
3R	25943579	25944986	1408	3	FBgn0266411	sima
3R	25948111	25948115	5	2	FBgn0266442	CG45072
3R	25948648	25949242	595	6	FBgn0266442	CG45072
3R	25949413	25949413	1	1
3R	25949515	25949515	1	1
3R	25950862	25950862	1	1
3R	25954684	25955065	382	2	FBgn0051025,FBgn0051029	Ppi1,CG31029
3R	25981386	25987711	6326	14	FBgn0039749	CG11498
3R	25988857	25990854	1998	17	FBgn0051030	CG31030
3R	25993611	25993712	102	2	FBgn0051028	CG31028
3R	26022565	26022565	1	1	FBgn0039756	CG9743
3R	26033391	26033407	17	5	FBgn0039757	RpS7
3R	26039508	26039508	1	1	FBgn0000278	CecB
3R	26042941	26042941	1	1
3R	26043218	26043218	1	1
3R	26044781	26044962	182	2
3R	26045578	26045578	1	1
3R	26045600	26045600	1	1
3R	26052533	26052533	1	1
3R	26055007	26055007	1	1
3R	26063004	26063004	1	1	FBgn0263402	CG43448
3R	26071009	26071012	4	2	FBgn0039759	CG9733
3R	26079936	26079936	1	1
3R	26201181	26201212	32	2
3R	26210117	26210117	1	1
3R	26234790	26235545	756	4
3R	26257603	26257603	1	1
3R	26261900	26261900	1	1	FBgn0039770	CG15537
3R	26325218	26325218	1	1	FBgn0039780	PH4alphaNE1
3R	26327079	26327079	1	1	FBgn0051371	CG31371
3R	26344877	26344877	1	1	FBgn0027654	jdp
3R	26350823	26350823	1	1	FBgn0027654	jdp
3R	26353582	26353595	14	2
3R	26355109	26355109	1	1	FBgn0267112	CR45552
3R	26376240	26376588	349	6	FBgn0082582	tmod
3R	26386492	26386492	1	1	FBgn0082582	tmod
3R	26396380	26396380	1	1	FBgn0082582	tmod
3R	26405592	26405592	1	1	FBgn0039787	CG9702
3R	26417402	26417402	1	1
3R	26431486	26431486	1	1	FBgn0051017	PH4alphaNE3
3R	26431714	26431714	1	1	FBgn0051017	PH4alphaNE3
3R	26434128	26434216	89	2	FBgn0051016	CG31016
3R	26438168	26438168	1	1	FBgn0267131	CR45571
3R	26450069	26450185	117	2
3R	26455841	26455841	1	1
3R	26463600	26463652	53	2
3R	26490727	26490727	1	1	FBgn0266701	CR45191
3R	26525603	26525603	1	1
3R	26535201	26535201	1	1
3R	26544559	26544559	1	1
3R	26546058	26546058	1	1
3R	26557312	26557312	1	1
3R	26562462	26562507	46	9
3R	27024862	27024862	1	1	FBgn0039827	CG1544
3R	27042062	27042062	1	1	FBgn0039830	CG1746
3R	27063902	27063902	1	1	FBgn0051005	qless
X	36988	69820	32833	3	FBgn0025835,FBgn0029128,FBgn0264445,FBgn0267029	CG17707,tyn,CR43863,CR45473
X	97655	162291	64637	5	FBgn0000316,FBgn0029128,FBgn0029518,FBgn0040372,FBgn0040373,FBgn0259722,FBgn0261446,FBgn0264507	cin,tyn,CG13376,G9a,CG3038,CG42376,CG13377,CR43906
X	184995	184997	3	1	FBgn0040370	CG13375
X	184996	184996	1	1	FBgn0024989	CG3777
X	199474	382606	183133	37	FBgn0000022,FBgn0000137,FBgn0002561,FBgn0004034,FBgn0004170,FBgn0010019,FBgn0011822,FBgn0023536,FBgn0024989,FBgn0029521,FBgn0029522,FBgn0029523,FBgn0029524,FBgn0029525,FBgn0029526,FBgn0040371,FBgn0052816,FBgn0052817,FBgn0262810,FBgn0262811,FBgn0265964,FBgn0265965,FBgn0265966,FBgn0266568,FBgn0266572	ac,ase,l(1)sc,y,sc,Cyp4g1,pcl,CG3156,CG3777,Or1a,CG13373,CR18275,CG3176,CG18273,CR18166,CG12470,CG32816,CG32817,CG43181,CG43182,CR44751,CR44752,CR44753,yar,ebo
X	392290	402993	10704	7	FBgn0004648,FBgn0266197	svr,CR44892
X	409378	409380	3	1	FBgn0023535	arg
X	409379	409379	1	1	FBgn0260400	elav
X	416046	418643	2598	4	FBgn0023535,FBgn0260400	arg,elav
X	423363	431307	7945	5	FBgn0000108,FBgn0024983	Appl,CG4293
X	438602	438602	1	1	FBgn0000108	Appl
X	440337	462324	21988	6	FBgn0000108	Appl
X	470239	470745	507	2	FBgn0000108	Appl
X	473201	482544	9344	16	FBgn0025633,FBgn0261930	CG13366,vnd
X	483534	563693	80160	51	FBgn0001341,FBgn0002579,FBgn0003575,FBgn0016038,FBgn0020381,FBgn0025633,FBgn0025634,FBgn0025635,FBgn0025637,FBgn0025638,FBgn0025639,FBgn0025640,FBgn0026879,FBgn0029529,FBgn0261930,FBgn0266102,FBgn0267030,FBgn0267031	l(1)1Bi,RpL36,su(s),mod(r),Dredd,CG13366,CG13367,CG17829,skpA,Roc1a,Hmt420,CG13369,CG13364,CG13365,vnd,CR44839,CR45474,CR45475
X	565264	569214	3951	9
X	576410	612352	35943	25	FBgn0021764	sdk
X	614830	619463	4634	6	FBgn0021764	sdk
X	620988	644517	23530	26	FBgn0021764,FBgn0029531,FBgn0040383	sdk,CG13362,CG5254
X	652647	670587	17941	26	FBgn0015288,FBgn0027343,FBgn0040382,FBgn0040383,FBgn0083027,FBgn0086666,FBgn0259993,FBgn0266280,FBgn0266281	RpL22,fz3,CG5273,CG5254,snoRNA:Psi18S531,snoRNA:Psi28S2179,CR42491,CR44965,CR44966
X	675145	675273	129	2	FBgn0027343	fz3
X	681701	681701	1	1	FBgn0086368	tw
X	683100	683100	1	1	FBgn0025620	CG13360
X	685072	686455	1384	11
X	686927	686927	1	1
X	690904	696143	5240	7	FBgn0015799,FBgn0025616,FBgn0025621	Rbf,CG13359,CG16989
X	696885	705461	8577	23	FBgn0025616,FBgn0026874,FBgn0260855,FBgn0264449	CG13359,CG13358,Sec22,CG43867
X	712137	736961	24825	57	FBgn0264449	CG43867
X	746585	772999	26415	19	FBgn0040341,FBgn0040892,FBgn0264449	CG11664,CG14634,CG43867
X	773735	778910	5176	6	FBgn0264449	CG43867
X	780348	856432	76085	94	FBgn0029539,FBgn0040339,FBgn0040340,FBgn0040342,FBgn0040344,FBgn0040345,FBgn0040346,FBgn0040347,FBgn0040348,FBgn0040349,FBgn0040350,FBgn0052815,FBgn0264449	CG11663,MED22,TRAM,CG3706,CG3711,CG3708,CG3704,mus81,CG3703,CG3699,CG3690,CG32815,CG43867
X	859029	911179	52151	58	FBgn0003638,FBgn0029552,FBgn0040338,FBgn0040351,FBgn0042146,FBgn0267032	su(w[a]),CG14631,TfIIAS2,CG11638,CG18823,CR45476
X	912082	912084	3	1	FBgn0040351	CG11638
X	912083	912083	1	1	FBgn0003638	su(w[a])
X	914258	914260	3	1	FBgn0040351,FBgn0052814	CG11638,CG32814
X	914259	914259	1	1	FBgn0003638	su(w[a])
X	943204	957538	14335	12	FBgn0040398,FBgn0266005	CG14629,CR44779
X	966693	980438	13746	14	FBgn0040397,FBgn0266005	CG3655,CR44779
X	981725	986696	4972	12	FBgn0040397,FBgn0266005	CG3655,CR44779
X	988975	993524	4550	11	FBgn0040397	CG3655
X	995854	998586	2733	8	FBgn0040397	CG3655
X	1000450	1003528	3079	10	FBgn0040397	CG3655
X	1003841	1004042	202	4	FBgn0040397	CG3655
X	1006974	1015504	8531	23	FBgn0040397	CG3655
X	1017059	1023063	6005	17	FBgn0040397	CG3655
X	1024197	1041192	16996	39	FBgn0040365,FBgn0040397	CG14628,CG3655
X	1041824	1054492	12669	40	FBgn0040368	eIF4E7
X	1054781	1054781	1	1	FBgn0040368	eIF4E7
X	1055967	1070390	14424	79	FBgn0040363,FBgn0040364,FBgn0040368,FBgn0085349	CG11384,CG11378,eIF4E7,CG34320
X	1093313	1134238	40926	5	FBgn0026876,FBgn0029568,FBgn0040357,FBgn0040358,FBgn0040366,FBgn0040367,FBgn0261444	CG11403,CG11381,CG14624,CG14625,CG11398,CG11382,CG3638
X	1146227	1184017	37791	16	FBgn0025641,FBgn0025642,FBgn0028550	DAAM,CG32812,Atf3
X	1190670	1191522	853	5	FBgn0025641	DAAM
X	1195169	1432959	237791	28	FBgn0000826,FBgn0003517,FBgn0004650,FBgn0013720,FBgn0023169,FBgn0024360,FBgn0024361,FBgn0024362,FBgn0024364,FBgn0024365,FBgn0024366,FBgn0024985,FBgn0024986,FBgn0024987,FBgn0025381,FBgn0025382,FBgn0025383,FBgn0025390,FBgn0025393,FBgn0025394,FBgn0025641,FBgn0026872,FBgn0027791,FBgn0027793,FBgn0027794,FBgn0027795,FBgn0029573,FBgn0029580,FBgn0044508,FBgn0052808,FBgn0052813,FBgn0053513,FBgn0086042,FBg…	png,sta,fs(1)N,pck,AMPKalpha,CG11418,Tsp2A,CG11412,CG11417,CG12773,CG11409,CG11448,CG3719,ssx,rush,Rab27,CG14780,Mur2B,CG14795,inc,DAAM,CG14777,Ofut2,CG14787,CG14786,CG14785,CG14770,CG14778,snoRNA:M,CG32808,CG32813,Nmdar2,snoRNA:Me28SG980,futsch,mei38,mir4961,Gr2a,Ns3
X	1444345	1544127	99783	11	FBgn0000210,FBgn0025390,FBgn0065095	br,Mur2B,snmRNA:400
X	1546035	1549124	3090	3	FBgn0000210,FBgn0025390,FBgn0029584	br,Mur2B,CG11509
X	1567110	1567110	1	1	FBgn0001189	hfw
X	1572221	1595516	23296	10	FBgn0023130,FBgn0023531,FBgn0024897,FBgn0029587,FBgn0029588	a6,CG32809,b6,CG14797,CG14798
X	1602275	1602275	1	1
X	1604999	1728302	123304	46	FBgn0025391,FBgn0026086,FBgn0029589,FBgn0029590,FBgn0052806,FBgn0261548,FBgn0262178	Scgdelta,Adar,CG14810,CG14811,CG32806,CG42666,mir981
X	1814018	1889406	75389	8	FBgn0023508,FBgn0023509,FBgn0023512,FBgn0023520,FBgn0023521,FBgn0023522,FBgn0264562	Ocrl,mip130,eIF2Bepsilon,CG3857,CG3587,CG11596,Hr4
X	1890180	2006625	116446	136	FBgn0000382,FBgn0000667,FBgn0003964,FBgn0023545,FBgn0025624,FBgn0025625,FBgn0025626,FBgn0025627,FBgn0025628,FBgn0025629,FBgn0025630,FBgn0025631,FBgn0025632,FBgn0026878,FBgn0029596,FBgn0040394,FBgn0040395,FBgn0086043,FBgn0261954,FBgn0262297,FBgn0263542,FBgn0264562,FBgn0265531,FBgn0265532,FBgn0266201,FBgn0267034	csw,Actn,usp,CG4406,CG4025,Sik2,CG4281,CG4194,CG4199,CG4045,CG4061,moody,CG4313,CG4325,CG14054,CG16903,Unc76,snoRNA:Me18SC1024,east,mir2496,mir4954,Hr4,CR44381,CR44382,CR44896,CR45478
X	2007898	2091975	84078	162	FBgn0000382,FBgn0003116,FBgn0004654,FBgn0004655,FBgn0004860,FBgn0004861,FBgn0005670,FBgn0011576,FBgn0013432,FBgn0015036,FBgn0023507,FBgn0023540,FBgn0023541,FBgn0023542,FBgn0023549,FBgn0024984,FBgn0025839,FBgn0029603,FBgn0040899,FBgn0040900,FBgn0263630,FBgn0265901,FBgn0267035	csw,pn,Pgd,wapl,phd,php,Cyp4d1,Cyp4d2,bcn92,Cyp4ae1,CG3835,CG3630,Cyp4d14,Nmd3,Mct1,CG3457,CG3621,CG14053,CG17776,CG17777,mir3641,CR44690,CR45479
X	2092802	2104272	11471	31	FBgn0023549,FBgn0023550,FBgn0053548,FBgn0263628	Mct1,CG18031,msta,CR43637
X	2106508	2139569	33062	38	FBgn0000810,FBgn0001330,FBgn0003048,FBgn0004397,FBgn0029606,FBgn0053548	fs(1)K10,kz,pcx,Vinc,CG14052,msta
X	2139817	2141575	1759	7	FBgn0000810,FBgn0023523	fs(1)K10,Or2a
X	2141697	2158653	16957	37	FBgn0000377,FBgn0023524,FBgn0023525,FBgn0023527,FBgn0027296,FBgn0029608	crn,CG3078,CG3191,CG3071,l(1)G0144,CG3091
X	2159229	2159272	44	2	FBgn0023528	CG2924
X	2164155	2164851	697	2	FBgn0023528,FBgn0267036	CG2924,CR45480
X	2165553	2170850	5298	22	FBgn0023529,FBgn0085362	CG2918,Vml
X	2183475	2196782	13308	36	FBgn0003079,FBgn0023526	phl,CG2865
X	2222938	2237888	14951	18	FBgn0003079,FBgn0040391,FBgn0044047,FBgn0053218	phl,CG2854,Ilp6,CR33218
X	2238073	2285144	47072	38	FBgn0003159,FBgn0040389,FBgn0264598	ptr,mRpL14,PsGEF
X	2287456	2302731	15276	14
X	2326859	2371644	44786	32	FBgn0003714,FBgn0004050,FBgn0040388,FBgn0261451	tko,z,boi,trol
X	2375080	2398180	23101	27	FBgn0261451	trol
X	2403483	2405982	2500	11	FBgn0261451	trol
X	2406831	2433595	26765	44	FBgn0261451	trol
X	2437059	2440307	3249	16	FBgn0261451,FBgn0263531	trol,mir4955
X	2440821	2454443	13623	56	FBgn0260753	Pdfr
X	2455193	2460178	4986	22	FBgn0260753	Pdfr
X	2460476	2464578	4103	9	FBgn0260753	Pdfr
X	2466864	2466992	129	4	FBgn0260753	Pdfr
X	2468474	2472012	3539	16	FBgn0260753	Pdfr
X	2472887	2491926	19040	69	FBgn0001404,FBgn0040066,FBgn0040375,FBgn0040376,FBgn0040377	egh,wds,CG13760,CG13759,Vha363
X	2532845	2532845	1	1	FBgn0003371	sgg
X	2546309	2546309	1	1	FBgn0003371	sgg
X	2546369	2557363	10995	11	FBgn0003371	sgg
X	2568666	2569321	656	3	FBgn0003371,FBgn0266707	sgg,CR45197
X	2573070	2573244	175	2	FBgn0003371	sgg
X	2574046	2582025	7980	26	FBgn0003068,FBgn0011276,FBgn0025838,FBgn0265663	per,HLH3B,CG2652,CR44470
X	2596705	2596926	222	3	FBgn0024994	Csat
X	2602289	2606087	3799	5	FBgn0024997,FBgn0024998	CG2681,CG2685
X	2610794	2616060	5267	9	FBgn0000928,FBgn0024973,FBgn0024991	fs(1)Yb,CG2701,CG2694
X	2618895	2618895	1	1	FBgn0000927	fs(1)Ya
X	2648165	2651439	3275	7	FBgn0028369	kirre
X	2657354	2657354	1	1	FBgn0028369	kirre
X	2661121	2661121	1	1	FBgn0028369	kirre
X	2661619	2661619	1	1	FBgn0028369	kirre
X	2665864	2665864	1	1	FBgn0028369	kirre
X	2669443	2669443	1	1	FBgn0028369	kirre
X	2672038	2672291	254	3	FBgn0028369	kirre
X	2672344	2672344	1	1	FBgn0028369	kirre
X	2675366	2677101	1736	2	FBgn0028369,FBgn0040384	kirre,CG32795
X	2681033	2681061	29	2	FBgn0028369,FBgn0040384	kirre,CG32795
X	2685416	2686118	703	7	FBgn0003996,FBgn0028369	w,kirre
X	2688223	2688238	16	2	FBgn0003996,FBgn0028369	w,kirre
X	2690620	2690776	157	3	FBgn0028369	kirre
X	2691441	2691441	1	1	FBgn0028369	kirre
X	2695791	2695791	1	1	FBgn0028369	kirre
X	2697796	2697796	1	1	FBgn0028369	kirre
X	2699328	2699346	19	2	FBgn0028369	kirre
X	2702282	2702282	1	1	FBgn0028369	kirre
X	2703783	2703783	1	1	FBgn0028369	kirre
X	2713843	2714042	200	2	FBgn0028369	kirre
X	2730218	2730917	700	2	FBgn0028369	kirre
X	2732629	2748301	15673	5	FBgn0028369	kirre
X	2749984	2749984	1	1	FBgn0028369	kirre
X	2756731	2756811	81	2	FBgn0028369	kirre
X	2758046	2758442	397	4	FBgn0028369	kirre
X	2760338	2761610	1273	6	FBgn0028369	kirre
X	2765384	2765384	1	1	FBgn0028369	kirre
X	2969489	2969489	1	1	FBgn0028369	kirre
X	3166308	3166308	1	1	FBgn0000479	dnc
X	3351524	3354453	2930	5	FBgn0029659,FBgn0266350	CG16782,CR44999
X	3356898	3356900	3	1	FBgn0266350	CR44999
X	3356899	3356899	1	1	FBgn0029661	CG16781
X	3399333	3399333	1	1	FBgn0266350	CR44999
X	3412917	3416331	3415	4	FBgn0052791,FBgn0266350	CG32791,CR44999
X	3416527	3417218	692	6	FBgn0052791,FBgn0266350	CG32791,CR44999
X	3418815	3420449	1635	6	FBgn0052791	CG32791
X	3431931	3431931	1	1	FBgn0052791	CG32791
X	3437279	3437279	1	1	FBgn0052791	CG32791
X	3438568	3439902	1335	2	FBgn0052791,FBgn0085364	CG32791,CR34335
X	3444103	3448961	4859	9	FBgn0052791	CG32791
X	3455165	3455167	3	1	FBgn0052791	CG32791
X	3455166	3455166	1	1	FBgn0052792	ppk8
X	3477711	3477711	1	1	FBgn0266429	AstAR1
X	3486081	3486081	1	1	FBgn0266429	AstAR1
X	3487001	3487001	1	1	FBgn0266429	AstAR1
X	3491372	3516393	25022	9	FBgn0266429	AstAR1
X	3538669	3538669	1	1	FBgn0266429	AstAR1
X	3540408	3542960	2553	9	FBgn0266429	AstAR1
X	3545319	3550211	4893	21	FBgn0266429	AstAR1
X	3550844	3551173	330	9	FBgn0266429	AstAR1
X	3552034	3552718	685	9	FBgn0266429	AstAR1
X	3553060	3554413	1354	21	FBgn0266429	AstAR1
X	3555321	3555670	350	5	FBgn0266429	AstAR1
X	3556000	3558396	2397	4	FBgn0266429	AstAR1
X	3559584	3560066	483	3	FBgn0266429	AstAR1
X	3602707	3602711	5	2	FBgn0015286	Rala
X	3609401	3609401	1	1	FBgn0015286	Rala
X	3614608	3614609	2	2	FBgn0086899	tlk
X	3620234	3625082	4849	7	FBgn0086899	tlk
X	3630085	3630085	1	1	FBgn0086899	tlk
X	3630252	3635741	5490	5	FBgn0086899	tlk
X	3657886	3671659	13774	6	FBgn0086899,FBgn0263532	tlk,mir4962
X	3703279	3703279	1	1	FBgn0264954	fd3F
X	3707880	3707898	19	3	FBgn0000542	ec
X	3709149	3709149	1	1	FBgn0000542	ec
X	3732834	3735612	2779	9	FBgn0000542	ec
X	3738791	3738791	1	1	FBgn0000542	ec
X	3741039	3742644	1606	5	FBgn0000542	ec
X	3745434	3745434	1	1	FBgn0000542	ec
X	3752840	3752840	1	1	FBgn0019661	roX1
X	3753479	3754914	1436	5	FBgn0019661	roX1
X	3758355	3758355	1	1	FBgn0265575	yin
X	3763919	3763921	3	1	FBgn0028491	CG2930
X	3763920	3763920	1	1	FBgn0265575	yin
X	3764910	3770682	5773	13	FBgn0028491,FBgn0265575	CG2930,yin
X	3775012	3793849	18838	16	FBgn0028665,FBgn0029681,FBgn0260658	VhaAC39,CG15239,CG42541
X	3796447	3800991	4545	10	FBgn0260658	CG42541
X	3803327	3814832	11506	23	FBgn0260658	CG42541
X	3815700	3815700	1	1	FBgn0260658	CG42541
X	3821034	3821034	1	1	FBgn0260658	CG42541
X	3825311	3825311	1	1
X	3839077	3839077	1	1	FBgn0052783	CG32783
X	3851388	3860810	9423	6	FBgn0029688,FBgn0029689	lva,CG6428
X	3864608	3874803	10196	20	FBgn0029690,FBgn0267037	CG6414,CR45481
X	3875814	3876225	412	4
X	3878006	3879236	1231	3
X	3879540	3879540	1	1
X	3892004	3894664	2661	5
X	3895819	3895819	1	1
X	3898357	3898357	1	1
X	3899209	3899323	115	3
X	3902501	3902501	1	1
X	3923088	3923088	1	1
X	3925011	3925011	1	1
X	4075985	4075985	1	1	FBgn0000635	Fas2
X	4090422	4090423	2	2	FBgn0000635	Fas2
X	4453431	4453433	3	1	FBgn0052773	CR32773
X	4453432	4453432	1	1	FBgn0029716	CG3546
X	4457446	4457446	1	1	FBgn0052773	CR32773
X	4636818	4636818	1	1
X	4642935	4642935	1	1
X	4650293	4650293	1	1
X	4651582	4651773	192	3
X	5091374	5091376	3	1	FBgn0266098	rg
X	5091375	5091375	1	1	FBgn0029746	CG15465
X	5091690	5091692	3	1	FBgn0266098	rg
X	5091691	5091691	1	1	FBgn0029746	CG15465
X	5093903	5093905	3	1	FBgn0266098	rg
X	5093904	5093904	1	1	FBgn0029746	CG15465
X	5197806	5197808	3	1	FBgn0261803	CG42749
X	5197807	5197807	1	1	FBgn0029750	CG3323
X	5225587	5225674	88	2	FBgn0026751	XRCC1
X	5237121	5237121	1	1	FBgn0029761	SK
X	5242373	5242373	1	1	FBgn0029761	SK
X	5243810	5244958	1149	6	FBgn0029761	SK
X	5245220	5245703	484	4	FBgn0029761	SK
X	5245854	5245854	1	1	FBgn0029761	SK
X	5250871	5250884	14	2	FBgn0029761	SK
X	5251777	5251777	1	1	FBgn0029761	SK
X	5252908	5252914	7	3	FBgn0029761	SK
X	5253275	5253275	1	1	FBgn0029761	SK
X	5256318	5256390	73	4	FBgn0029761	SK
X	5256793	5256794	2	2	FBgn0029761	SK
X	5261430	5261632	203	2	FBgn0029761	SK
X	5262500	5262500	1	1	FBgn0029761	SK
X	5303073	5303073	1	1	FBgn0029762	NAAT1
X	5369835	5369835	1	1	FBgn0029768	SPR
X	5370622	5371288	667	4	FBgn0029768	SPR
X	5374453	5374453	1	1	FBgn0029768	SPR
X	5375099	5379806	4708	4	FBgn0029768	SPR
X	5382064	5382263	200	4	FBgn0029768	SPR
X	5382693	5382757	65	7	FBgn0029768	SPR
X	5383133	5383439	307	5	FBgn0029768	SPR
X	5385853	5386697	845	4	FBgn0029768	SPR
X	5387824	5388102	279	2	FBgn0029768,FBgn0029769	SPR,frma
X	5390279	5390279	1	1
X	5395113	5395487	375	8	FBgn0052762	CG32762
X	5395652	5395652	1	1	FBgn0029770	CG4151
X	5403514	5404140	627	3
X	5404350	5404373	24	2
X	5404783	5407605	2823	9
X	5410101	5410101	1	1
X	5412049	5412221	173	3	FBgn0029771	CG12730
X	5427677	5427684	8	2	FBgn0263512	Vsx2
X	5428601	5429385	785	4	FBgn0263512	Vsx2
X	5430504	5430519	16	2	FBgn0263512	Vsx2
X	5436684	5437358	675	4	FBgn0263512	Vsx2
X	5440364	5440364	1	1	FBgn0263512	Vsx2
X	5442308	5442964	657	2	FBgn0263512	Vsx2
X	5445246	5445246	1	1	FBgn0263512	Vsx2
X	5445733	5446403	671	5	FBgn0263512	Vsx2
X	5447943	5448107	165	4	FBgn0263512	Vsx2
X	5450938	5450938	1	1	FBgn0263512	Vsx2
X	5459532	5459532	1	1
X	5461557	5461561	5	2
X	5472754	5472754	1	1
X	5479889	5479934	46	2
X	5482252	5483294	1043	9
X	5487083	5487083	1	1
X	5492381	5492381	1	1	FBgn0263511	Vsx1
X	5494639	5494639	1	1	FBgn0263511	Vsx1
X	5494893	5497509	2617	5	FBgn0263511	Vsx1
X	5498037	5498037	1	1	FBgn0263511	Vsx1
X	5498681	5498682	2	2	FBgn0263511	Vsx1
X	5504700	5504715	16	2	FBgn0263511	Vsx1
X	5511294	5511294	1	1	FBgn0029778	RhoGAP5A
X	5512906	5513009	104	5
X	5513631	5513631	1	1	FBgn0004687	Mlcc
X	5516259	5516259	1	1	FBgn0004687	Mlcc
X	5516649	5516649	1	1
X	5521044	5521073	30	2	FBgn0259994	CG42492
X	5535353	5535353	1	1	FBgn0259994	CG42492
X	5541665	5541702	38	2	FBgn0259994	CG42492
X	5548721	5548721	1	1	FBgn0259150	CG42265
X	5560646	5560646	1	1	FBgn0028474	CG4119
X	5685931	5685940	10	2
X	5720950	5720950	1	1	FBgn0029814	CG15765
X	5905856	5905894	39	5	FBgn0029003	mab21
X	5914697	5915290	594	3
X	5923003	5923023	21	2
X	5923886	5923887	2	2
X	5924305	5924309	5	2
X	5966061	5966538	478	7	FBgn0029837	Tsp5D
X	5967520	5967597	78	4	FBgn0029837	Tsp5D
X	5969990	5969990	1	1
X	5977396	5977398	3	1	FBgn0026060	Mipp2
X	5977397	5977397	1	1	FBgn0029840	raptor
X	6013902	6013902	1	1	FBgn0264386	Caalpha1T
X	6018704	6018704	1	1	FBgn0264386	Caalpha1T
X	6047093	6047093	1	1	FBgn0264386	Caalpha1T
X	6048824	6048824	1	1	FBgn0264386	Caalpha1T
X	6074784	6074784	1	1	FBgn0264386	Caalpha1T
X	6083994	6083994	1	1	FBgn0264386	Caalpha1T
X	6084140	6084173	34	2	FBgn0264386	Caalpha1T
X	6085254	6085254	1	1	FBgn0264386	Caalpha1T
X	6085776	6086455	680	5	FBgn0264386	Caalpha1T
X	6087768	6088828	1061	8	FBgn0052750	CG32750
X	6091182	6091506	325	6	FBgn0052751	CG32751
X	6092041	6092041	1	1	FBgn0052751	CG32751
X	6092368	6092713	346	3	FBgn0052751	CG32751
X	6099314	6099362	49	9
X	6101941	6102495	555	5
X	6103666	6103666	1	1
[truncated: 354 more rows]

## Sheet: Table S4
FlyBase ID	Gene Name	Gene Symbol	Vienna Stock Number
FBgn0000018	abnormal oocyte	abo	v105384
FBgn0000256	cappuccino	capu	v110404
FBgn0000377	crooked neck	crn	v39335
FBgn0000479	dunce	dnc	v107967
FBgn0000524	deltex	dx	v106086
FBgn0000568	Ecdysone-induced protein 75B	Eip75B	v108399
FBgn0001223	Heat shock protein 22	Hsp22	v43632
FBgn0001404	egghead	egh	v45160
FBgn0003048	pecanex	pcx	v14934
FBgn0003116	prune	pn	v6975
FBgn0003371	shaggy	sgg	v101538
FBgn0004379	Kinesin-like protein at 67A	Klp67A	v108852
FBgn0004650	female sterile (1) Nasrat	fs(1)N	v105859
FBgn0004872	P-element induced wimpy testis	piwi	v101658
FBgn0010019	Cytochrome P450-4g1	Cyp4g1	v102864
FBgn0010382	Cyclin E	CycE	v110204
FBgn0010909	misshapen	msn	v101517
FBgn0011211	bellwether	blw	v34664
FBgn0011361	NADH dehydrogenase (ubiquinone) acyl carrier protein	ND-ACP	v107907
FBgn0011769	Ferredoxin 1	Fdx1	v6987
FBgn0015288	Ribosomal protein L22	RpL22	v104506
FBgn0016031	lamina ancestor	lama	v107629
FBgn0020381	Death related ced-3/Nedd2-like caspase	Dredd	v104726
FBgn0023527	CG3071	CG3071	v107206
FBgn0023531	CG32809	CG32809	v104480
FBgn0023542	Nonsense-mediated mRNA 3	Nmd3	v105619
FBgn0025626	CG4281	CG4281	v100390
FBgn0025640	CG13369	CG13369	v100747
FBgn0025641	Dishevelled Associated Activator of Morphogenesis	DAAM	v103921
FBgn0027334	lethal (1) G0004	l(1)G0004	v16289
FBgn0027903	CG12018	CG12018	v108565
FBgn0028360	Cdc7 kinase	Cdc7	v40715
FBgn0029525	CG18273	CG18273	v107818
FBgn0031519	Fidgetin	CG3326	v110211
FBgn0034025	Polypeptide N-Acetylgalactosaminyltransferase 1	Pgant1	v37174
FBgn0034491	Hormone-sensitive lipase	Hsl	v109336
FBgn0034498	CG16868	CG16868	v8209
FBgn0034724	babos	babos	v956
FBgn0034734	CG4554	CG4554	v103706
FBgn0035252	CG7970	CG7970	v106325
FBgn0035253	CG7971	CG7971	v101384
FBgn0035270	CG13933	CG13933	v100947
FBgn0035440	CG14969	CG14969	v8913
FBgn0035981	CG4452	CG4452	v107773
FBgn0040066	will die slowly	wds	v105371
FBgn0040339	Mediator complex subunit 22	MED22	v104581
FBgn0040340	TRAM	TRAM	v39187
FBgn0040344	Leucine zipper like transcription regulator 1	Lztr1	v11164
FBgn0040346	CG3704	CG3704	v101389
FBgn0040372	G9a	G9a	v110662
FBgn0040375	CG13760	CG13760	v106483
FBgn0040383	CG5254	CG5254	v45163
FBgn0040388	brother of ihog	boi	v3060
FBgn0040900	CG17777	CG17777	v105327
FBgn0086370	sarah	sra	v108876
FBgn0270924	zinc finger protein 30C	zf30c	v15753
FBgn0286831	small ovary	sov	v100109

## Sheet: Table S5
Gene	Vial Replicate	Sex	Block	Fly Replicate	Age at Death
CycE	1	Male	1	Rep1	37
CycE	1	Male	1	Rep2	76
CycE	1	Male	1	Rep3	90
CycE	2	Male	1	Rep1	80
CycE	2	Male	1	Rep2	83
CycE	2	Male	1	Rep3	83
CycE	3	Male	1	Rep1	69
CycE	3	Male	1	Rep2	69
CycE	3	Male	1	Rep3	83
CycE	4	Male	1	Rep1	73
CycE	4	Male	1	Rep2	78
CycE	4	Male	1	Rep3	78
CycE	5	Male	1	Rep1	62
CycE	5	Male	1	Rep2	83
CycE	5	Male	1	Rep3	94
CycE	6	Male	1	Rep1	N/A
CycE	6	Male	1	Rep2	83
CycE	6	Male	1	Rep3	94
CycE	7	Male	1	Rep1	N/A
CycE	7	Male	1	Rep2	41
CycE	7	Male	1	Rep3	48
CycE	8	Male	1	Rep1	N/A
CycE	8	Male	1	Rep2	37
CycE	8	Male	1	Rep3	41
CycE	9	Male	1	Rep1	N/A
CycE	9	Male	1	Rep2	48
CycE	9	Male	1	Rep3	87
CycE	10	Male	1	Rep1	N/A
CycE	10	Male	1	Rep2	73
CycE	10	Male	1	Rep3	85
CycE	11	Male	1	Rep1	N/A
CycE	11	Male	1	Rep2	44
CycE	11	Male	1	Rep3	51
CycE	12	Male	1	Rep1	83
CycE	12	Male	1	Rep2	83
CycE	12	Male	1	Rep3	87
CycE	13	Male	1	Rep1	59
CycE	13	Male	1	Rep2	83
CycE	13	Male	1	Rep3	94
CycE	14	Male	1	Rep1	N/A
CycE	14	Male	1	Rep2	66
CycE	14	Male	1	Rep3	66
CycE	15	Male	1	Rep1	62
CycE	15	Male	1	Rep2	73
CycE	15	Male	1	Rep3	78
CycE	16	Male	1	Rep1	31
CycE	16	Male	1	Rep2	48
CycE	16	Male	1	Rep3	83
CycE	17	Male	1	Rep1	N/A
CycE	17	Male	1	Rep2	38
CycE	17	Male	1	Rep3	83
CycE	18	Male	1	Rep1	N/A
CycE	18	Male	1	Rep2	62
CycE	18	Male	1	Rep3	94
CycE	19	Male	1	Rep1	78
CycE	19	Male	1	Rep2	90
CycE	19	Male	1	Rep3	94
CycE	20	Male	1	Rep1	87
CycE	20	Male	1	Rep2	90
CycE	20	Male	1	Rep3	94
CycE	21	Male	1	Rep1	69
CycE	21	Male	1	Rep2	71
CycE	21	Male	1	Rep3	83
CycE	22	Male	1	Rep1	N/A
CycE	22	Male	1	Rep2	48
CycE	22	Male	1	Rep3	51
CycE	23	Male	1	Rep1	76
CycE	23	Male	1	Rep2	80
CycE	23	Male	1	Rep3	80
CycE	24	Male	1	Rep1	29
CycE	24	Male	1	Rep2	31
CycE	24	Male	1	Rep3	62
CycE	25	Male	1	Rep1	N/A
CycE	25	Male	1	Rep2	87
CycE	25	Male	1	Rep3	94
CycE	26	Male	1	Rep1	41
CycE	26	Male	1	Rep2	44
CycE	26	Male	1	Rep3	83
CycE	27	Male	1	Rep1	78
CycE	27	Male	1	Rep2	80
CycE	27	Male	1	Rep3	94
CycE	28	Male	1	Rep1	34
CycE	28	Male	1	Rep2	43
CycE	28	Male	1	Rep3	64
CycE	29	Male	1	Rep1	34
CycE	29	Male	1	Rep2	41
CycE	29	Male	1	Rep3	51
CycE	30	Male	1	Rep1	41
CycE	30	Male	1	Rep2	N/A
CycE	30	Male	1	Rep3	62
CycE	31	Male	1	Rep1	48
CycE	31	Male	1	Rep2	50
CycE	31	Male	1	Rep3	53
CycE	32	Male	1	Rep1	36
CycE	32	Male	1	Rep2	62
CycE	32	Male	1	Rep3	85
CycE	33	Male	1	Rep1	30
CycE	33	Male	1	Rep2	41
CycE	33	Male	1	Rep3	48
CycE	34	Male	1	Rep1	N/A
CycE	34	Male	1	Rep2	87
CycE	34	Male	1	Rep3	94
CycE	35	Male	1	Rep1	34
CycE	35	Male	1	Rep2	45
CycE	35	Male	1	Rep3	90
CycE	36	Male	1	Rep1	36
CycE	36	Male	1	Rep2	41
CycE	36	Male	1	Rep3	90
CycE	37	Male	1	Rep1	N/A
CycE	37	Male	1	Rep2	20
CycE	37	Male	1	Rep3	65
CycE	38	Male	1	Rep1	20
CycE	38	Male	1	Rep2	83
CycE	38	Male	1	Rep3	90
CycE	39	Male	1	Rep1	62
CycE	39	Male	1	Rep2	73
CycE	39	Male	1	Rep3	90
CycE	40	Male	1	Rep1	13
CycE	40	Male	1	Rep2	83
CycE	40	Male	1	Rep3	90
CycE	41	Male	1	Rep1	69
CycE	41	Male	1	Rep2	78
CycE	41	Male	1	Rep3	87
CycE	42	Male	1	Rep1	38
CycE	42	Male	1	Rep2	45
CycE	42	Male	1	Rep3	83
CycE	43	Male	1	Rep1	27
CycE	43	Male	1	Rep2	78
CycE	43	Male	1	Rep3	90
CycE	44	Male	1	Rep1	48
CycE	44	Male	1	Rep2	55
CycE	44	Male	1	Rep3	62
CycE	45	Male	1	Rep1	24
CycE	45	Male	1	Rep2	36
CycE	45	Male	1	Rep3	41
CycE	46	Male	1	Rep1	41
CycE	46	Male	1	Rep2	76
CycE	46	Male	1	Rep3	78
CycE	47	Male	1	Rep1	41
CycE	47	Male	1	Rep2	48
CycE	47	Male	1	Rep3	80
CycE	48	Male	1	Rep1	N/A
CycE	48	Male	1	Rep2	53
CycE	48	Male	1	Rep3	62
CG3704	1	Male	1	Rep1	13
CG3704	1	Male	1	Rep2	15
CG3704	1	Male	1	Rep3	53
CG3704	2	Male	1	Rep1	1
CG3704	2	Male	1	Rep2	23
CG3704	2	Male	1	Rep3	66
CG3704	3	Male	1	Rep1	20
CG3704	3	Male	1	Rep2	27
CG3704	3	Male	1	Rep3	48
CG3704	4	Male	1	Rep1	N/A
CG3704	4	Male	1	Rep2	24
CG3704	4	Male	1	Rep3	41
CG3704	5	Male	1	Rep1	16
CG3704	5	Male	1	Rep2	16
CG3704	5	Male	1	Rep3	78
CG3704	6	Male	1	Rep1	20
CG3704	6	Male	1	Rep2	43
CG3704	6	Male	1	Rep3	55
CG3704	7	Male	1	Rep1	15
CG3704	7	Male	1	Rep2	34
CG3704	7	Male	1	Rep3	43
CG3704	8	Male	1	Rep1	17
CG3704	8	Male	1	Rep2	41
CG3704	8	Male	1	Rep3	52
CG3704	9	Male	1	Rep1	13
CG3704	9	Male	1	Rep2	15
CG3704	9	Male	1	Rep3	15
CG3704	10	Male	1	Rep1	13
CG3704	10	Male	1	Rep2	15
CG3704	10	Male	1	Rep3	15
CG3704	11	Male	1	Rep1	27
CG3704	11	Male	1	Rep2	34
CG3704	11	Male	1	Rep3	41
CG3704	12	Male	1	Rep1	13
CG3704	12	Male	1	Rep2	31
CG3704	12	Male	1	Rep3	31
CG3704	13	Male	1	Rep1	N/A
CG3704	13	Male	1	Rep2	16
CG3704	13	Male	1	Rep3	44
CG3704	14	Male	1	Rep1	15
CG3704	14	Male	1	Rep2	15
CG3704	14	Male	1	Rep3	17
CG3704	15	Male	1	Rep1	13
CG3704	15	Male	1	Rep2	13
CG3704	15	Male	1	Rep3	17
CG3704	16	Male	1	Rep1	13
CG3704	16	Male	1	Rep2	27
CG3704	16	Male	1	Rep3	45
CG3704	17	Male	1	Rep1	16
CG3704	17	Male	1	Rep2	16
CG3704	17	Male	1	Rep3	31
CG3704	18	Male	1	Rep1	13
CG3704	18	Male	1	Rep2	13
CG3704	18	Male	1	Rep3	41
CG3704	19	Male	1	Rep1	13
CG3704	19	Male	1	Rep2	34
CG3704	19	Male	1	Rep3	43
CG3704	20	Male	1	Rep1	13
CG3704	20	Male	1	Rep2	13
CG3704	20	Male	1	Rep3	38
CG3704	21	Male	1	Rep1	13
CG3704	21	Male	1	Rep2	37
CG3704	21	Male	1	Rep3	41
CG3704	22	Male	1	Rep1	20
CG3704	22	Male	1	Rep2	62
CG3704	22	Male	1	Rep3	69
CG3704	23	Male	1	Rep1	13
CG3704	23	Male	1	Rep2	27
CG3704	23	Male	1	Rep3	62
CG3704	24	Male	1	Rep1	38
CG3704	24	Male	1	Rep2	41
CG3704	24	Male	1	Rep3	48
CG3704	25	Male	1	Rep1	27
CG3704	25	Male	1	Rep2	27
CG3704	25	Male	1	Rep3	53
CG3704	26	Male	1	Rep1	13
CG3704	26	Male	1	Rep2	16
CG3704	26	Male	1	Rep3	37
CG3704	27	Male	1	Rep1	13
CG3704	27	Male	1	Rep2	41
CG3704	27	Male	1	Rep3	69
CG3704	28	Male	1	Rep1	13
CG3704	28	Male	1	Rep2	31
CG3704	28	Male	1	Rep3	41
CG3704	29	Male	1	Rep1	13
CG3704	29	Male	1	Rep2	34
CG3704	29	Male	1	Rep3	48
CG3704	30	Male	1	Rep1	27
CG3704	30	Male	1	Rep2	51
CG3704	30	Male	1	Rep3	69
CG3704	31	Male	1	Rep1	13
CG3704	31	Male	1	Rep2	49
CG3704	31	Male	1	Rep3	N/A
CG3704	32	Male	1	Rep1	15
CG3704	32	Male	1	Rep2	41
CG3704	32	Male	1	Rep3	53
CG3704	33	Male	1	Rep1	13
CG3704	33	Male	1	Rep2	15
CG3704	33	Male	1	Rep3	41
CG3704	34	Male	1	Rep1	N/A
CG3704	34	Male	1	Rep2	13
CG3704	34	Male	1	Rep3	71
CG3704	35	Male	1	Rep1	41
CG3704	35	Male	1	Rep2	45
CG3704	35	Male	1	Rep3	48
CG3704	36	Male	1	Rep1	34
CG3704	36	Male	1	Rep2	64
CG3704	36	Male	1	Rep3	66
CG3704	37	Male	1	Rep1	15
CG3704	37	Male	1	Rep2	53
CG3704	37	Male	1	Rep3	62
CG3704	38	Male	1	Rep1	16
CG3704	38	Male	1	Rep2	20
CG3704	38	Male	1	Rep3	48
CG3704	39	Male	1	Rep1	15
CG3704	39	Male	1	Rep2	17
CG3704	39	Male	1	Rep3	45
CG3704	40	Male	1	Rep1	N/A
CG3704	40	Male	1	Rep2	34
CG3704	40	Male	1	Rep3	45
CG3704	41	Male	1	Rep1	13
CG3704	41	Male	1	Rep2	27
CG3704	41	Male	1	Rep3	44
CG3704	42	Male	1	Rep1	34
CG3704	42	Male	1	Rep2	43
CG3704	42	Male	1	Rep3	48
CG3704	43	Male	1	Rep1	17
CG3704	43	Male	1	Rep2	45
CG3704	43	Male	1	Rep3	45
CG3704	44	Male	1	Rep1	16
CG3704	44	Male	1	Rep2	16
CG3704	44	Male	1	Rep3	51
CG3704	45	Male	1	Rep1	53
CG3704	45	Male	1	Rep2	71
CG3704	45	Male	1	Rep3	72
CG3704	46	Male	1	Rep1	13
CG3704	46	Male	1	Rep2	34
CG3704	46	Male	1	Rep3	53
CG3704	47	Male	1	Rep1	20
CG3704	47	Male	1	Rep2	27
CG3704	47	Male	1	Rep3	43
CG3704	48	Male	1	Rep1	64
CG3704	48	Male	1	Rep2	66
CG3704	48	Male	1	Rep3	69
Eip75B	1	Male	1	Rep1	43
Eip75B	1	Male	1	Rep2	73
Eip75B	1	Male	1	Rep3	76
Eip75B	2	Male	1	Rep1	N/A
Eip75B	2	Male	1	Rep2	76
Eip75B	2	Male	1	Rep3	78
Eip75B	3	Male	1	Rep1	N/A
Eip75B	3	Male	1	Rep2	76
Eip75B	3	Male	1	Rep3	94
Eip75B	4	Male	1	Rep1	41
Eip75B	4	Male	1	Rep2	43
Eip75B	4	Male	1	Rep3	69
Eip75B	5	Male	1	Rep1	N/A
Eip75B	5	Male	1	Rep2	43
Eip75B	5	Male	1	Rep3	45
Eip75B	6	Male	1	Rep1	N/A
Eip75B	6	Male	1	Rep2	17
Eip75B	6	Male	1	Rep3	48
Eip75B	7	Male	1	Rep1	44
Eip75B	7	Male	1	Rep2	73
Eip75B	7	Male	1	Rep3	85
Eip75B	8	Male	1	Rep1	29
Eip75B	8	Male	1	Rep2	59
Eip75B	8	Male	1	Rep3	62
Eip75B	9	Male	1	Rep1	50
Eip75B	9	Male	1	Rep2	69
Eip75B	9	Male	1	Rep3	83
Eip75B	10	Male	1	Rep1	48
Eip75B	10	Male	1	Rep2	48
Eip75B	10	Male	1	Rep3	55
Eip75B	11	Male	1	Rep1	N/A
Eip75B	11	Male	1	Rep2	44
Eip75B	11	Male	1	Rep3	65
Eip75B	12	Male	1	Rep1	34
Eip75B	12	Male	1	Rep2	48
Eip75B	12	Male	1	Rep3	69
Eip75B	13	Male	1	Rep1	76
Eip75B	13	Male	1	Rep2	83
Eip75B	13	Male	1	Rep3	83
Eip75B	14	Male	1	Rep1	34
Eip75B	14	Male	1	Rep2	90
Eip75B	14	Male	1	Rep3	90
Eip75B	15	Male	1	Rep1	43
Eip75B	15	Male	1	Rep2	48
Eip75B	15	Male	1	Rep3	48
Eip75B	16	Male	1	Rep1	76
Eip75B	16	Male	1	Rep2	83
Eip75B	16	Male	1	Rep3	83
Eip75B	17	Male	1	Rep1	72
Eip75B	17	Male	1	Rep2	83
Eip75B	17	Male	1	Rep3	83
Eip75B	18	Male	1	Rep1	6
Eip75B	18	Male	1	Rep2	29
Eip75B	18	Male	1	Rep3	62
Eip75B	19	Male	1	Rep1	N/A
Eip75B	19	Male	1	Rep2	78
Eip75B	19	Male	1	Rep3	94
Eip75B	20	Male	1	Rep1	N/A
Eip75B	20	Male	1	Rep2	44
Eip75B	20	Male	1	Rep3	52
Eip75B	21	Male	1	Rep1	43
Eip75B	21	Male	1	Rep2	48
Eip75B	21	Male	1	Rep3	62
Eip75B	22	Male	1	Rep1	53
Eip75B	22	Male	1	Rep2	62
Eip75B	22	Male	1	Rep3	83
Eip75B	23	Male	1	Rep1	29
Eip75B	23	Male	1	Rep2	N/A
Eip75B	23	Male	1	Rep3	90
Eip75B	24	Male	1	Rep1	44
Eip75B	24	Male	1	Rep2	69
Eip75B	24	Male	1	Rep3	76
Eip75B	25	Male	1	Rep1	48
Eip75B	25	Male	1	Rep2	53
Eip75B	25	Male	1	Rep3	78
Eip75B	26	Male	1	Rep1	73
Eip75B	26	Male	1	Rep2	80
Eip75B	26	Male	1	Rep3	94
Eip75B	27	Male	1	Rep1	30
Eip75B	27	Male	1	Rep2	58
Eip75B	27	Male	1	Rep3	62
Eip75B	28	Male	1	Rep1	45
Eip75B	28	Male	1	Rep2	64
Eip75B	28	Male	1	Rep3	83
Eip75B	29	Male	1	Rep1	76
Eip75B	29	Male	1	Rep2	83
Eip75B	29	Male	1	Rep3	83
Eip75B	30	Male	1	Rep1	20
Eip75B	30	Male	1	Rep2	69
Eip75B	30	Male	1	Rep3	76
Eip75B	31	Male	1	Rep1	41
Eip75B	31	Male	1	Rep2	41
Eip75B	31	Male	1	Rep3	44
Eip75B	32	Male	1	Rep1	N/A
Eip75B	32	Male	1	Rep2	N/A
Eip75B	32	Male	1	Rep3	N/A
Eip75B	33	Male	1	Rep1	38
Eip75B	33	Male	1	Rep2	66
Eip75B	33	Male	1	Rep3	69
Eip75B	34	Male	1	Rep1	41
Eip75B	34	Male	1	Rep2	62
Eip75B	34	Male	1	Rep3	90
Eip75B	35	Male	1	Rep1	34
Eip75B	35	Male	1	Rep2	N/A
Eip75B	35	Male	1	Rep3	73
Eip75B	36	Male	1	Rep1	N/A
Eip75B	36	Male	1	Rep2	36
Eip75B	36	Male	1	Rep3	48
Eip75B	37	Male	1	Rep1	N/A
Eip75B	37	Male	1	Rep2	N/A
Eip75B	37	Male	1	Rep3	N/A
Eip75B	38	Male	1	Rep1	80
Eip75B	38	Male	1	Rep2	80
Eip75B	38	Male	1	Rep3	80
Eip75B	39	Male	1	Rep1	48
Eip75B	39	Male	1	Rep2	80
Eip75B	39	Male	1	Rep3	80
Eip75B	40	Male	1	Rep1	43
Eip75B	40	Male	1	Rep2	71
Eip75B	40	Male	1	Rep3	83
Eip75B	41	Male	1	Rep1	78
Eip75B	41	Male	1	Rep2	78
Eip75B	41	Male	1	Rep3	90
Eip75B	42	Male	1	Rep1	N/A
Eip75B	42	Male	1	Rep2	50
Eip75B	42	Male	1	Rep3	90
Eip75B	43	Male	1	Rep1	N/A
Eip75B	43	Male	1	Rep2	78
Eip75B	43	Male	1	Rep3	90
Eip75B	44	Male	1	Rep1	N/A
Eip75B	44	Male	1	Rep2	44
Eip75B	44	Male	1	Rep3	62
Eip75B	45	Male	1	Rep1	43
Eip75B	45	Male	1	Rep2	53
Eip75B	45	Male	1	Rep3	76
Eip75B	46	Male	1	Rep1	20
Eip75B	46	Male	1	Rep2	41
Eip75B	46	Male	1	Rep3	57
Eip75B	47	Male	1	Rep1	41
Eip75B	47	Male	1	Rep2	76
Eip75B	47	Male	1	Rep3	80
Eip75B	48	Male	1	Rep1	55
Eip75B	48	Male	1	Rep2	69
Eip75B	48	Male	1	Rep3	83
MED22	1	Male	1	Rep1	N/A
MED22	1	Male	1	Rep2	45
MED22	1	Male	1	Rep3	94
MED22	2	Male	1	Rep1	62
MED22	2	Male	1	Rep2	69
MED22	2	Male	1	Rep3	83
MED22	3	Male	1	Rep1	13
MED22	3	Male	1	Rep2	41
MED22	3	Male	1	Rep3	53
MED22	4	Male	1	Rep1	N/A
MED22	4	Male	1	Rep2	N/A
MED22	4	Male	1	Rep3	N/A
MED22	5	Male	1	Rep1	80
MED22	5	Male	1	Rep2	83
MED22	5	Male	1	Rep3	94
MED22	6	Male	1	Rep1	62
MED22	6	Male	1	Rep2	83
MED22	6	Male	1	Rep3	83
MED22	7	Male	1	Rep1	83
MED22	7	Male	1	Rep2	83
MED22	7	Male	1	Rep3	83
MED22	8	Male	1	Rep1	30
MED22	8	Male	1	Rep2	37
MED22	8	Male	1	Rep3	62
MED22	9	Male	1	Rep1	38
MED22	9	Male	1	Rep2	41
MED22	9	Male	1	Rep3	90
MED22	10	Male	1	Rep1	62
MED22	10	Male	1	Rep2	80
MED22	10	Male	1	Rep3	90
MED22	11	Male	1	Rep1	48
MED22	11	Male	1	Rep2	83
MED22	11	Male	1	Rep3	94
MED22	12	Male	1	Rep1	83
MED22	12	Male	1	Rep2	83
MED22	12	Male	1	Rep3	83
MED22	13	Male	1	Rep1	38
MED22	13	Male	1	Rep2	41
MED22	13	Male	1	Rep3	62
MED22	14	Male	1	Rep1	N/A
MED22	14	Male	1	Rep2	N/A
MED22	14	Male	1	Rep3	N/A
MED22	15	Male	1	Rep1	53
MED22	15	Male	1	Rep2	76
MED22	15	Male	1	Rep3	76
MED22	16	Male	1	Rep1	44
MED22	16	Male	1	Rep2	N/A
MED22	16	Male	1	Rep3	80
MED22	17	Male	1	Rep1	71
MED22	17	Male	1	Rep2	76
MED22	17	Male	1	Rep3	76
MED22	18	Male	1	Rep1	34
MED22	18	Male	1	Rep2	N/A
MED22	18	Male	1	Rep3	90
MED22	19	Male	1	Rep1	34
MED22	19	Male	1	Rep2	53
MED22	19	Male	1	Rep3	83
MED22	20	Male	1	Rep1	N/A
MED22	20	Male	1	Rep2	48
MED22	20	Male	1	Rep3	59
MED22	21	Male	1	Rep1	N/A
MED22	21	Male	1	Rep2	48
MED22	21	Male	1	Rep3	62
MED22	22	Male	1	Rep1	6
MED22	22	Male	1	Rep2	N/A
MED22	22	Male	1	Rep3	43
MED22	23	Male	1	Rep1	34
MED22	23	Male	1	Rep2	73
MED22	23	Male	1	Rep3	90
MED22	24	Male	1	Rep1	48
MED22	24	Male	1	Rep2	48
MED22	24	Male	1	Rep3	69
MED22	25	Male	1	Rep1	43
MED22	25	Male	1	Rep2	48
MED22	25	Male	1	Rep3	73
MED22	26	Male	1	Rep1	45
MED22	26	Male	1	Rep2	59
MED22	26	Male	1	Rep3	66
MED22	27	Male	1	Rep1	73
MED22	27	Male	1	Rep2	90
MED22	27	Male	1	Rep3	94
MED22	28	Male	1	Rep1	N/A
MED22	28	Male	1	Rep2	90
MED22	28	Male	1	Rep3	90
MED22	29	Male	1	Rep1	69
MED22	29	Male	1	Rep2	73
MED22	29	Male	1	Rep3	83
MED22	30	Male	1	Rep1	62
MED22	30	Male	1	Rep2	83
MED22	30	Male	1	Rep3	90
MED22	31	Male	1	Rep1	N/A
MED22	31	Male	1	Rep2	38
MED22	31	Male	1	Rep3	51
MED22	32	Male	1	Rep1	83
MED22	32	Male	1	Rep2	83
MED22	32	Male	1	Rep3	83
MED22	33	Male	1	Rep1	53
MED22	33	Male	1	Rep2	69
MED22	33	Male	1	Rep3	83
MED22	34	Male	1	Rep1	76
MED22	34	Male	1	Rep2	80
MED22	34	Male	1	Rep3	90
MED22	35	Male	1	Rep1	N/A
MED22	35	Male	1	Rep2	34
MED22	35	Male	1	Rep3	37
MED22	36	Male	1	Rep1	N/A
MED22	36	Male	1	Rep2	73
MED22	36	Male	1	Rep3	80
MED22	37	Male	1	Rep1	50
MED22	37	Male	1	Rep2	N/A
MED22	37	Male	1	Rep3	90
MED22	38	Male	1	Rep1	N/A
MED22	38	Male	1	Rep2	90
MED22	38	Male	1	Rep3	90
MED22	39	Male	1	Rep1	76
MED22	39	Male	1	Rep2	83
MED22	39	Male	1	Rep3	90
MED22	40	Male	1	Rep1	N/A
MED22	40	Male	1	Rep2	41
MED22	40	Male	1	Rep3	53
MED22	41	Male	1	Rep1	N/A
MED22	41	Male	1	Rep2	36
MED22	41	Male	1	Rep3	48
MED22	42	Male	1	Rep1	41
MED22	42	Male	1	Rep2	48
MED22	42	Male	1	Rep3	50
MED22	43	Male	1	Rep1	62
MED22	43	Male	1	Rep2	71
MED22	43	Male	1	Rep3	90
MED22	44	Male	1	Rep1	83
MED22	44	Male	1	Rep2	85
MED22	44	Male	1	Rep3	87
MED22	45	Male	1	Rep1	83
MED22	45	Male	1	Rep2	90
MED22	45	Male	1	Rep3	90
MED22	46	Male	1	Rep1	53
MED22	46	Male	1	Rep2	85
MED22	46	Male	1	Rep3	94
MED22	47	Male	1	Rep1	43
MED22	47	Male	1	Rep2	90
MED22	47	Male	1	Rep3	94
MED22	48	Male	1	Rep1	73
MED22	48	Male	1	Rep2	83
MED22	48	Male	1	Rep3	94
Nmd3	1	Male	1	Rep1	N/A
Nmd3	1	Male	1	Rep2	51
Nmd3	1	Male	1	Rep3	58
Nmd3	2	Male	1	Rep1	48
Nmd3	2	Male	1	Rep2	53
Nmd3	2	Male	1	Rep3	69
Nmd3	3	Male	1	Rep1	57
Nmd3	3	Male	1	Rep2	66
Nmd3	3	Male	1	Rep3	76
Nmd3	4	Male	1	Rep1	30
Nmd3	4	Male	1	Rep2	37
Nmd3	4	Male	1	Rep3	44
Nmd3	5	Male	1	Rep1	27
Nmd3	5	Male	1	Rep2	34
Nmd3	5	Male	1	Rep3	53
Nmd3	6	Male	1	Rep1	57
Nmd3	6	Male	1	Rep2	57
Nmd3	6	Male	1	Rep3	83
Nmd3	7	Male	1	Rep1	41
Nmd3	7	Male	1	Rep2	53
Nmd3	7	Male	1	Rep3	53
Nmd3	8	Male	1	Rep1	45
Nmd3	8	Male	1	Rep2	55
Nmd3	8	Male	1	Rep3	90
Nmd3	9	Male	1	Rep1	48
Nmd3	9	Male	1	Rep2	73
Nmd3	9	Male	1	Rep3	80
Nmd3	10	Male	1	Rep1	22
Nmd3	10	Male	1	Rep2	27
Nmd3	10	Male	1	Rep3	27
Nmd3	11	Male	1	Rep1	27
Nmd3	11	Male	1	Rep2	53
Nmd3	11	Male	1	Rep3	53
Nmd3	12	Male	1	Rep1	30
Nmd3	12	Male	1	Rep2	48
Nmd3	12	Male	1	Rep3	55
Nmd3	13	Male	1	Rep1	41
Nmd3	13	Male	1	Rep2	83
Nmd3	13	Male	1	Rep3	83
Nmd3	14	Male	1	Rep1	55
Nmd3	14	Male	1	Rep2	73
Nmd3	14	Male	1	Rep3	85
Nmd3	15	Male	1	Rep1	N/A
Nmd3	15	Male	1	Rep2	41
Nmd3	15	Male	1	Rep3	66
Nmd3	16	Male	1	Rep1	N/A
Nmd3	16	Male	1	Rep2	N/A
Nmd3	16	Male	1	Rep3	N/A
Nmd3	17	Male	1	Rep1	48
Nmd3	17	Male	1	Rep2	58
Nmd3	17	Male	1	Rep3	76
Nmd3	18	Male	1	Rep1	45
Nmd3	18	Male	1	Rep2	53
Nmd3	18	Male	1	Rep3	62
Nmd3	19	Male	1	Rep1	36
Nmd3	19	Male	1	Rep2	38
Nmd3	19	Male	1	Rep3	71
Nmd3	20	Male	1	Rep1	53
Nmd3	20	Male	1	Rep2	53
Nmd3	20	Male	1	Rep3	53
Nmd3	21	Male	1	Rep1	51
Nmd3	21	Male	1	Rep2	73
Nmd3	21	Male	1	Rep3	78
Nmd3	22	Male	1	Rep1	27
Nmd3	22	Male	1	Rep2	43
Nmd3	22	Male	1	Rep3	50
Nmd3	23	Male	1	Rep1	22
Nmd3	23	Male	1	Rep2	45
Nmd3	23	Male	1	Rep3	76
Nmd3	24	Male	1	Rep1	N/A
Nmd3	24	Male	1	Rep2	69
Nmd3	24	Male	1	Rep3	69
Nmd3	25	Male	1	Rep1	48
Nmd3	25	Male	1	Rep2	58
Nmd3	25	Male	1	Rep3	59
Nmd3	26	Male	1	Rep1	31
Nmd3	26	Male	1	Rep2	53
Nmd3	26	Male	1	Rep3	66
Nmd3	27	Male	1	Rep1	N/A
Nmd3	27	Male	1	Rep2	57
Nmd3	27	Male	1	Rep3	62
Nmd3	28	Male	1	Rep1	44
Nmd3	28	Male	1	Rep2	58
Nmd3	28	Male	1	Rep3	69
Nmd3	29	Male	1	Rep1	62
Nmd3	29	Male	1	Rep2	62
Nmd3	29	Male	1	Rep3	83
Nmd3	30	Male	1	Rep1	29
Nmd3	30	Male	1	Rep2	69
Nmd3	30	Male	1	Rep3	94
Nmd3	31	Male	1	Rep1	58
Nmd3	31	Male	1	Rep2	69
Nmd3	31	Male	1	Rep3	73
Nmd3	32	Male	1	Rep1	N/A
Nmd3	32	Male	1	Rep2	41
Nmd3	32	Male	1	Rep3	45
Nmd3	33	Male	1	Rep1	48
Nmd3	33	Male	1	Rep2	48
Nmd3	33	Male	1	Rep3	64
Nmd3	34	Male	1	Rep1	N/A
Nmd3	34	Male	1	Rep2	62
Nmd3	34	Male	1	Rep3	71
Nmd3	35	Male	1	Rep1	N/A
Nmd3	35	Male	1	Rep2	N/A
Nmd3	35	Male	1	Rep3	N/A
Nmd3	36	Male	1	Rep1	34
Nmd3	36	Male	1	Rep2	53
Nmd3	36	Male	1	Rep3	62
Nmd3	37	Male	1	Rep1	41
Nmd3	37	Male	1	Rep2	48
Nmd3	37	Male	1	Rep3	48
Nmd3	38	Male	1	Rep1	53
Nmd3	38	Male	1	Rep2	62
Nmd3	38	Male	1	Rep3	76
Nmd3	39	Male	1	Rep1	N/A
Nmd3	39	Male	1	Rep2	23
Nmd3	39	Male	1	Rep3	51
Nmd3	40	Male	1	Rep1	36
Nmd3	40	Male	1	Rep2	62
Nmd3	40	Male	1	Rep3	90
Nmd3	41	Male	1	Rep1	N/A
Nmd3	41	Male	1	Rep2	73
Nmd3	41	Male	1	Rep3	73
Nmd3	42	Male	1	Rep1	76
Nmd3	42	Male	1	Rep2	78
Nmd3	42	Male	1	Rep3	83
Nmd3	43	Male	1	Rep1	53
Nmd3	43	Male	1	Rep2	76
Nmd3	43	Male	1	Rep3	83
Nmd3	44	Male	1	Rep1	57
Nmd3	44	Male	1	Rep2	69
Nmd3	44	Male	1	Rep3	69
Nmd3	45	Male	1	Rep1	48
Nmd3	45	Male	1	Rep2	50
Nmd3	45	Male	1	Rep3	55
Nmd3	46	Male	1	Rep1	51
Nmd3	46	Male	1	Rep2	55
Nmd3	46	Male	1	Rep3	58
Nmd3	47	Male	1	Rep1	59
Nmd3	47	Male	1	Rep2	80
Nmd3	47	Male	1	Rep3	80
Nmd3	48	Male	1	Rep1	43
Nmd3	48	Male	1	Rep2	48
Nmd3	48	Male	1	Rep3	48
piwi	1	Male	1	Rep1	34
piwi	1	Male	1	Rep2	36
piwi	1	Male	1	Rep3	53
piwi	2	Male	1	Rep1	48
piwi	2	Male	1	Rep2	69
piwi	2	Male	1	Rep3	90
piwi	3	Male	1	Rep1	45
piwi	3	Male	1	Rep2	48
piwi	3	Male	1	Rep3	83
piwi	4	Male	1	Rep1	N/A
piwi	4	Male	1	Rep2	38
piwi	4	Male	1	Rep3	78
piwi	5	Male	1	Rep1	41
piwi	5	Male	1	Rep2	62
piwi	5	Male	1	Rep3	83
piwi	6	Male	1	Rep1	45
piwi	6	Male	1	Rep2	53
piwi	6	Male	1	Rep3	69
piwi	7	Male	1	Rep1	31
piwi	7	Male	1	Rep2	N/A
piwi	7	Male	1	Rep3	83
piwi	8	Male	1	Rep1	64
piwi	8	Male	1	Rep2	69
piwi	8	Male	1	Rep3	83
piwi	9	Male	1	Rep1	80
piwi	9	Male	1	Rep2	80
piwi	9	Male	1	Rep3	80
piwi	10	Male	1	Rep1	83
piwi	10	Male	1	Rep2	83
piwi	10	Male	1	Rep3	90
piwi	11	Male	1	Rep1	N/A
piwi	11	Male	1	Rep2	N/A
piwi	11	Male	1	Rep3	N/A
piwi	12	Male	1	Rep1	20
piwi	12	Male	1	Rep2	50
piwi	12	Male	1	Rep3	83
piwi	13	Male	1	Rep1	41
piwi	13	Male	1	Rep2	48
piwi	13	Male	1	Rep3	48
piwi	14	Male	1	Rep1	38
piwi	14	Male	1	Rep2	41
piwi	14	Male	1	Rep3	94
piwi	15	Male	1	Rep1	N/A
piwi	15	Male	1	Rep2	41
piwi	15	Male	1	Rep3	55
piwi	16	Male	1	Rep1	36
piwi	16	Male	1	Rep2	53
piwi	16	Male	1	Rep3	53
piwi	17	Male	1	Rep1	69
piwi	17	Male	1	Rep2	83
piwi	17	Male	1	Rep3	83
piwi	18	Male	1	Rep1	76
piwi	18	Male	1	Rep2	78
piwi	18	Male	1	Rep3	83
piwi	19	Male	1	Rep1	N/A
piwi	19	Male	1	Rep2	N/A
piwi	19	Male	1	Rep3	N/A
piwi	20	Male	1	Rep1	N/A
piwi	20	Male	1	Rep2	78
piwi	20	Male	1	Rep3	83
piwi	21	Male	1	Rep1	30
piwi	21	Male	1	Rep2	41
piwi	21	Male	1	Rep3	58
piwi	22	Male	1	Rep1	69
piwi	22	Male	1	Rep2	83
piwi	22	Male	1	Rep3	83
piwi	23	Male	1	Rep1	31
piwi	23	Male	1	Rep2	43
piwi	23	Male	1	Rep3	76
piwi	24	Male	1	Rep1	48
piwi	24	Male	1	Rep2	52
piwi	24	Male	1	Rep3	85
piwi	25	Male	1	Rep1	N/A
piwi	25	Male	1	Rep2	48
piwi	25	Male	1	Rep3	48
piwi	26	Male	1	Rep1	45
piwi	26	Male	1	Rep2	55
piwi	26	Male	1	Rep3	78
piwi	27	Male	1	Rep1	27
piwi	27	Male	1	Rep2	41
piwi	27	Male	1	Rep3	69
piwi	28	Male	1	Rep1	83
piwi	28	Male	1	Rep2	83
piwi	28	Male	1	Rep3	90
piwi	29	Male	1	Rep1	24
piwi	29	Male	1	Rep2	51
piwi	29	Male	1	Rep3	76
piwi	30	Male	1	Rep1	N/A
piwi	30	Male	1	Rep2	27
piwi	30	Male	1	Rep3	90
piwi	31	Male	1	Rep1	41
piwi	31	Male	1	Rep2	57
piwi	31	Male	1	Rep3	76
piwi	32	Male	1	Rep1	48
piwi	32	Male	1	Rep2	57
piwi	32	Male	1	Rep3	90
piwi	33	Male	1	Rep1	48
piwi	33	Male	1	Rep2	57
piwi	33	Male	1	Rep3	90
piwi	34	Male	1	Rep1	N/A
piwi	34	Male	1	Rep2	53
piwi	34	Male	1	Rep3	57
piwi	35	Male	1	Rep1	38
piwi	35	Male	1	Rep2	48
piwi	35	Male	1	Rep3	83
piwi	36	Male	1	Rep1	78
piwi	36	Male	1	Rep2	83
piwi	36	Male	1	Rep3	90
piwi	37	Male	1	Rep1	36
piwi	37	Male	1	Rep2	N/A
piwi	37	Male	1	Rep3	69
piwi	38	Male	1	Rep1	44
piwi	38	Male	1	Rep2	51
piwi	38	Male	1	Rep3	65
piwi	39	Male	1	Rep1	31
piwi	39	Male	1	Rep2	41
piwi	39	Male	1	Rep3	N/A
piwi	40	Male	1	Rep1	34
piwi	40	Male	1	Rep2	50
piwi	40	Male	1	Rep3	53
piwi	41	Male	1	Rep1	53
piwi	41	Male	1	Rep2	66
piwi	41	Male	1	Rep3	94
piwi	42	Male	1	Rep1	45
piwi	42	Male	1	Rep2	50
piwi	42	Male	1	Rep3	62
piwi	43	Male	1	Rep1	20
piwi	43	Male	1	Rep2	N/A
piwi	43	Male	1	Rep3	50
piwi	44	Male	1	Rep1	41
piwi	44	Male	1	Rep2	44
piwi	44	Male	1	Rep3	N/A
piwi	45	Male	1	Rep1	45
piwi	45	Male	1	Rep2	48
piwi	45	Male	1	Rep3	69
piwi	46	Male	1	Rep1	78
piwi	46	Male	1	Rep2	83
piwi	46	Male	1	Rep3	87
piwi	47	Male	1	Rep1	N/A
piwi	47	Male	1	Rep2	48
piwi	47	Male	1	Rep3	51
piwi	48	Male	1	Rep1	45
piwi	48	Male	1	Rep2	48
piwi	48	Male	1	Rep3	69
sgg	1	Male	1	Rep1	51
sgg	1	Male	1	Rep2	55
sgg	1	Male	1	Rep3	55
sgg	2	Male	1	Rep1	N/A
sgg	2	Male	1	Rep2	53
sgg	2	Male	1	Rep3	64
sgg	3	Male	1	Rep1	N/A
sgg	3	Male	1	Rep2	41
sgg	3	Male	1	Rep3	80
sgg	4	Male	1	Rep1	53
sgg	4	Male	1	Rep2	64
sgg	4	Male	1	Rep3	69
sgg	5	Male	1	Rep1	51
sgg	5	Male	1	Rep2	55
sgg	5	Male	1	Rep3	65
sgg	6	Male	1	Rep1	41
sgg	6	Male	1	Rep2	53
sgg	6	Male	1	Rep3	55
sgg	7	Male	1	Rep1	59
sgg	7	Male	1	Rep2	66
sgg	7	Male	1	Rep3	69
sgg	8	Male	1	Rep1	76
sgg	8	Male	1	Rep2	78
sgg	8	Male	1	Rep3	80
sgg	9	Male	1	Rep1	30
sgg	9	Male	1	Rep2	48
sgg	9	Male	1	Rep3	76
sgg	10	Male	1	Rep1	48
sgg	10	Male	1	Rep2	53
sgg	10	Male	1	Rep3	53
sgg	11	Male	1	Rep1	64
sgg	11	Male	1	Rep2	69
sgg	11	Male	1	Rep3	73
sgg	12	Male	1	Rep1	83
sgg	12	Male	1	Rep2	90
sgg	12	Male	1	Rep3	90
sgg	13	Male	1	Rep1	48
sgg	13	Male	1	Rep2	76
sgg	13	Male	1	Rep3	76
sgg	14	Male	1	Rep1	66
sgg	14	Male	1	Rep2	69
sgg	14	Male	1	Rep3	83
sgg	15	Male	1	Rep1	48
sgg	15	Male	1	Rep2	53
sgg	15	Male	1	Rep3	69
sgg	16	Male	1	Rep1	73
sgg	16	Male	1	Rep2	83
sgg	16	Male	1	Rep3	83
sgg	17	Male	1	Rep1	69
sgg	17	Male	1	Rep2	69
sgg	17	Male	1	Rep3	87
sgg	18	Male	1	Rep1	48
sgg	18	Male	1	Rep2	76
sgg	18	Male	1	Rep3	76
sgg	19	Male	1	Rep1	41
sgg	19	Male	1	Rep2	41
sgg	19	Male	1	Rep3	55
sgg	20	Male	1	Rep1	51
sgg	20	Male	1	Rep2	62
sgg	20	Male	1	Rep3	76
sgg	21	Male	1	Rep1	27
sgg	21	Male	1	Rep2	34
sgg	21	Male	1	Rep3	69
sgg	22	Male	1	Rep1	83
sgg	22	Male	1	Rep2	83
sgg	22	Male	1	Rep3	90
sgg	23	Male	1	Rep1	N/A
sgg	23	Male	1	Rep2	69
sgg	23	Male	1	Rep3	69
sgg	24	Male	1	Rep1	78
sgg	24	Male	1	Rep2	78
sgg	24	Male	1	Rep3	83
sgg	25	Male	1	Rep1	48
sgg	25	Male	1	Rep2	62
sgg	25	Male	1	Rep3	64
sgg	26	Male	1	Rep1	N/A
sgg	26	Male	1	Rep2	N/A
sgg	26	Male	1	Rep3	N/A
sgg	27	Male	1	Rep1	71
sgg	27	Male	1	Rep2	76
sgg	27	Male	1	Rep3	90
sgg	28	Male	1	Rep1	N/A
sgg	28	Male	1	Rep2	62
sgg	28	Male	1	Rep3	64
sgg	29	Male	1	Rep1	N/A
sgg	29	Male	1	Rep2	83
sgg	29	Male	1	Rep3	83
sgg	30	Male	1	Rep1	66
sgg	30	Male	1	Rep2	69
sgg	30	Male	1	Rep3	76
sgg	31	Male	1	Rep1	23
sgg	31	Male	1	Rep2	30
sgg	31	Male	1	Rep3	58
sgg	32	Male	1	Rep1	45
sgg	32	Male	1	Rep2	83
sgg	32	Male	1	Rep3	87
sgg	33	Male	1	Rep1	43
sgg	33	Male	1	Rep2	76
sgg	33	Male	1	Rep3	76
sgg	34	Male	1	Rep1	48
sgg	34	Male	1	Rep2	N/A
sgg	34	Male	1	Rep3	57
sgg	35	Male	1	Rep1	50
sgg	35	Male	1	Rep2	59
sgg	35	Male	1	Rep3	64
sgg	36	Male	1	Rep1	65
sgg	36	Male	1	Rep2	65
sgg	36	Male	1	Rep3	90
sgg	37	Male	1	Rep1	69
sgg	37	Male	1	Rep2	72
sgg	37	Male	1	Rep3	76
sgg	38	Male	1	Rep1	43
sgg	38	Male	1	Rep2	83
sgg	38	Male	1	Rep3	83
sgg	39	Male	1	Rep1	27
sgg	39	Male	1	Rep2	53
sgg	39	Male	1	Rep3	69
sgg	40	Male	1	Rep1	20
sgg	40	Male	1	Rep2	58
sgg	40	Male	1	Rep3	76
sgg	41	Male	1	Rep1	41
sgg	41	Male	1	Rep2	62
sgg	41	Male	1	Rep3	76
sgg	42	Male	1	Rep1	48
sgg	42	Male	1	Rep2	62
sgg	42	Male	1	Rep3	83
sgg	43	Male	1	Rep1	55
sgg	43	Male	1	Rep2	69
sgg	43	Male	1	Rep3	90
sgg	44	Male	1	Rep1	20
sgg	44	Male	1	Rep2	57
sgg	44	Male	1	Rep3	59
sgg	45	Male	1	Rep1	66
sgg	45	Male	1	Rep2	73
sgg	45	Male	1	Rep3	76
sgg	46	Male	1	Rep1	13
sgg	46	Male	1	Rep2	34
sgg	46	Male	1	Rep3	83
sgg	47	Male	1	Rep1	44
sgg	47	Male	1	Rep2	65
sgg	47	Male	1	Rep3	76
sgg	48	Male	1	Rep1	27
sgg	48	Male	1	Rep2	48
sgg	48	Male	1	Rep3	53
capu	1	Male	1	Rep1	41
capu	1	Male	1	Rep2	50
capu	1	Male	1	Rep3	76
capu	2	Male	1	Rep1	N/A
capu	2	Male	1	Rep2	37
capu	2	Male	1	Rep3	55
capu	3	Male	1	Rep1	53
capu	3	Male	1	Rep2	69
capu	3	Male	1	Rep3	72
capu	4	Male	1	Rep1	27
capu	4	Male	1	Rep2	N/A
capu	4	Male	1	Rep3	83
capu	5	Male	1	Rep1	41
capu	5	Male	1	Rep2	73
capu	5	Male	1	Rep3	90
capu	6	Male	1	Rep1	N/A
capu	6	Male	1	Rep2	37
capu	6	Male	1	Rep3	80
capu	7	Male	1	Rep1	45
capu	7	Male	1	Rep2	78
capu	7	Male	1	Rep3	83
capu	8	Male	1	Rep1	34
capu	8	Male	1	Rep2	45
capu	8	Male	1	Rep3	76
capu	9	Male	1	Rep1	53
capu	9	Male	1	Rep2	N/A
capu	9	Male	1	Rep3	87
capu	10	Male	1	Rep1	48
capu	10	Male	1	Rep2	51
capu	10	Male	1	Rep3	71
capu	11	Male	1	Rep1	41
capu	11	Male	1	Rep2	57
capu	11	Male	1	Rep3	69
capu	12	Male	1	Rep1	76
capu	12	Male	1	Rep2	76
capu	12	Male	1	Rep3	83
capu	13	Male	1	Rep1	62
capu	13	Male	1	Rep2	65
capu	13	Male	1	Rep3	80
capu	14	Male	1	Rep1	N/A
capu	14	Male	1	Rep2	41
capu	14	Male	1	Rep3	76
capu	15	Male	1	Rep1	N/A
capu	15	Male	1	Rep2	64
capu	15	Male	1	Rep3	94
capu	16	Male	1	Rep1	29
capu	16	Male	1	Rep2	80
capu	16	Male	1	Rep3	85
capu	17	Male	1	Rep1	36
capu	17	Male	1	Rep2	76
capu	17	Male	1	Rep3	80
capu	18	Male	1	Rep1	48
capu	18	Male	1	Rep2	90
capu	18	Male	1	Rep3	90
capu	19	Male	1	Rep1	N/A
capu	19	Male	1	Rep2	53
capu	19	Male	1	Rep3	62
capu	20	Male	1	Rep1	57
capu	20	Male	1	Rep2	69
capu	20	Male	1	Rep3	80
capu	21	Male	1	Rep1	41
capu	21	Male	1	Rep2	90
capu	21	Male	1	Rep3	94
capu	22	Male	1	Rep1	53
capu	22	Male	1	Rep2	53
capu	22	Male	1	Rep3	69
capu	23	Male	1	Rep1	50
capu	23	Male	1	Rep2	76
capu	23	Male	1	Rep3	87
capu	24	Male	1	Rep1	22
capu	24	Male	1	Rep2	48
capu	24	Male	1	Rep3	64
capu	25	Male	1	Rep1	N/A
capu	25	Male	1	Rep2	87
capu	25	Male	1	Rep3	90
capu	26	Male	1	Rep1	N/A
capu	26	Male	1	Rep2	48
capu	26	Male	1	Rep3	62
capu	27	Male	1	Rep1	38
capu	27	Male	1	Rep2	N/A
capu	27	Male	1	Rep3	72
capu	28	Male	1	Rep1	76
capu	28	Male	1	Rep2	76
capu	28	Male	1	Rep3	83
capu	29	Male	1	Rep1	50
capu	29	Male	1	Rep2	66
capu	29	Male	1	Rep3	69
capu	30	Male	1	Rep1	76
capu	30	Male	1	Rep2	90
capu	30	Male	1	Rep3	90
capu	31	Male	1	Rep1	2
capu	31	Male	1	Rep2	55
capu	31	Male	1	Rep3	73
capu	32	Male	1	Rep1	N/A
capu	32	Male	1	Rep2	48
capu	32	Male	1	Rep3	90
capu	33	Male	1	Rep1	51
capu	33	Male	1	Rep2	62
capu	33	Male	1	Rep3	65
capu	34	Male	1	Rep1	N/A
capu	34	Male	1	Rep2	87
capu	34	Male	1	Rep3	90
capu	35	Male	1	Rep1	N/A
capu	35	Male	1	Rep2	76
capu	35	Male	1	Rep3	83
capu	36	Male	1	Rep1	66
capu	36	Male	1	Rep2	71
capu	36	Male	1	Rep3	90
capu	37	Male	1	Rep1	83
capu	37	Male	1	Rep2	83
capu	37	Male	1	Rep3	94
capu	38	Male	1	Rep1	N/A
capu	38	Male	1	Rep2	36
capu	38	Male	1	Rep3	87
capu	39	Male	1	Rep1	23
capu	39	Male	1	Rep2	51
capu	39	Male	1	Rep3	55
capu	40	Male	1	Rep1	83
capu	40	Male	1	Rep2	83
capu	40	Male	1	Rep3	90
capu	41	Male	1	Rep1	76
capu	41	Male	1	Rep2	83
capu	41	Male	1	Rep3	83
capu	42	Male	1	Rep1	N/A
capu	42	Male	1	Rep2	62
capu	42	Male	1	Rep3	76
capu	43	Male	1	Rep1	N/A
capu	43	Male	1	Rep2	N/A
capu	43	Male	1	Rep3	N/A
capu	44	Male	1	Rep1	N/A
capu	44	Male	1	Rep2	34
capu	44	Male	1	Rep3	71
capu	45	Male	1	Rep1	71
capu	45	Male	1	Rep2	80
capu	45	Male	1	Rep3	83
capu	46	Male	1	Rep1	80
capu	46	Male	1	Rep2	83
capu	46	Male	1	Rep3	83
capu	47	Male	1	Rep1	22
capu	47	Male	1	Rep2	53
capu	47	Male	1	Rep3	76
capu	48	Male	1	Rep1	62
capu	48	Male	1	Rep2	76
capu	48	Male	1	Rep3	76
sov	1	Male	1	Rep1	N/A
sov	1	Male	1	Rep2	N/A
sov	1	Male	1	Rep3	N/A
sov	2	Male	1	Rep1	N/A
sov	2	Male	1	Rep2	41
sov	2	Male	1	Rep3	72
sov	3	Male	1	Rep1	30
sov	3	Male	1	Rep2	69
sov	3	Male	1	Rep3	78
sov	4	Male	1	Rep1	62
sov	4	Male	1	Rep2	80
sov	4	Male	1	Rep3	87
sov	5	Male	1	Rep1	66
sov	5	Male	1	Rep2	66
sov	5	Male	1	Rep3	83
sov	6	Male	1	Rep1	76
sov	6	Male	1	Rep2	78
sov	6	Male	1	Rep3	94
sov	7	Male	1	Rep1	30
sov	7	Male	1	Rep2	N/A
sov	7	Male	1	Rep3	55
sov	8	Male	1	Rep1	N/A
sov	8	Male	1	Rep2	62
sov	8	Male	1	Rep3	76
sov	9	Male	1	Rep1	76
sov	9	Male	1	Rep2	90
sov	9	Male	1	Rep3	94
sov	10	Male	1	Rep1	29
sov	10	Male	1	Rep2	59
sov	10	Male	1	Rep3	69
sov	11	Male	1	Rep1	62
sov	11	Male	1	Rep2	65
sov	11	Male	1	Rep3	76
sov	12	Male	1	Rep1	41
sov	12	Male	1	Rep2	53
sov	12	Male	1	Rep3	83
sov	13	Male	1	Rep1	N/A
sov	13	Male	1	Rep2	34
sov	13	Male	1	Rep3	53
sov	14	Male	1	Rep1	53
sov	14	Male	1	Rep2	78
sov	14	Male	1	Rep3	80
sov	15	Male	1	Rep1	N/A
sov	15	Male	1	Rep2	65
sov	15	Male	1	Rep3	73
sov	16	Male	1	Rep1	41
sov	16	Male	1	Rep2	72
sov	16	Male	1	Rep3	83
sov	17	Male	1	Rep1	24
sov	17	Male	1	Rep2	62
sov	17	Male	1	Rep3	94
sov	18	Male	1	Rep1	22
sov	18	Male	1	Rep2	34
sov	18	Male	1	Rep3	55
sov	19	Male	1	Rep1	29
sov	19	Male	1	Rep2	48
sov	19	Male	1	Rep3	53
sov	20	Male	1	Rep1	48
sov	20	Male	1	Rep2	69
sov	20	Male	1	Rep3	85
sov	21	Male	1	Rep1	34
sov	21	Male	1	Rep2	41
sov	21	Male	1	Rep3	48
sov	22	Male	1	Rep1	N/A
sov	22	Male	1	Rep2	53
sov	22	Male	1	Rep3	53
sov	23	Male	1	Rep1	37
sov	23	Male	1	Rep2	41
sov	23	Male	1	Rep3	58
sov	24	Male	1	Rep1	13
sov	24	Male	1	Rep2	48
sov	24	Male	1	Rep3	48
sov	25	Male	1	Rep1	34
sov	25	Male	1	Rep2	62
sov	25	Male	1	Rep3	69
sov	26	Male	1	Rep1	34
sov	26	Male	1	Rep2	76
sov	26	Male	1	Rep3	94
sov	27	Male	1	Rep1	27
sov	27	Male	1	Rep2	64
sov	27	Male	1	Rep3	83
sov	28	Male	1	Rep1	N/A
sov	28	Male	1	Rep2	44
sov	28	Male	1	Rep3	48
sov	29	Male	1	Rep1	N/A
sov	29	Male	1	Rep2	55
sov	29	Male	1	Rep3	83
sov	30	Male	1	Rep1	34
sov	30	Male	1	Rep2	48
sov	30	Male	1	Rep3	50
sov	31	Male	1	Rep1	76
sov	31	Male	1	Rep2	83
sov	31	Male	1	Rep3	83
sov	32	Male	1	Rep1	73
sov	32	Male	1	Rep2	83
sov	32	Male	1	Rep3	90
sov	33	Male	1	Rep1	N/A
sov	33	Male	1	Rep2	41
sov	33	Male	1	Rep3	45
sov	34	Male	1	Rep1	62
sov	34	Male	1	Rep2	69
sov	34	Male	1	Rep3	90
sov	35	Male	1	Rep1	41
sov	35	Male	1	Rep2	53
sov	35	Male	1	Rep3	94
sov	36	Male	1	Rep1	50
sov	36	Male	1	Rep2	N/A
sov	36	Male	1	Rep3	90
sov	37	Male	1	Rep1	N/A
sov	37	Male	1	Rep2	41
sov	37	Male	1	Rep3	48
sov	38	Male	1	Rep1	N/A
sov	38	Male	1	Rep2	66
sov	38	Male	1	Rep3	85
sov	39	Male	1	Rep1	N/A
sov	39	Male	1	Rep2	55
sov	39	Male	1	Rep3	55
sov	40	Male	1	Rep1	N/A
sov	40	Male	1	Rep2	N/A
sov	40	Male	1	Rep3	N/A
sov	41	Male	1	Rep1	34
sov	41	Male	1	Rep2	62
sov	41	Male	1	Rep3	76
sov	42	Male	1	Rep1	N/A
sov	42	Male	1	Rep2	83
sov	42	Male	1	Rep3	90
sov	43	Male	1	Rep1	31
sov	43	Male	1	Rep2	80
sov	43	Male	1	Rep3	80
sov	44	Male	1	Rep1	31
sov	44	Male	1	Rep2	41
sov	44	Male	1	Rep3	48
sov	45	Male	1	Rep1	N/A
sov	45	Male	1	Rep2	62
sov	45	Male	1	Rep3	65
sov	46	Male	1	Rep1	24
sov	46	Male	1	Rep2	48
sov	46	Male	1	Rep3	76
sov	47	Male	1	Rep1	50
sov	47	Male	1	Rep2	N/A
sov	47	Male	1	Rep3	55
sov	48	Male	1	Rep1	23
sov	48	Male	1	Rep2	30
sov	48	Male	1	Rep3	80
CG3071	1	Male	1	Rep1	N/A
CG3071	1	Male	1	Rep2	48
CG3071	1	Male	1	Rep3	76
CG3071	2	Male	1	Rep1	69
CG3071	2	Male	1	Rep2	76
CG3071	2	Male	1	Rep3	83
CG3071	3	Male	1	Rep1	27
CG3071	3	Male	1	Rep2	55
CG3071	3	Male	1	Rep3	90
CG3071	4	Male	1	Rep1	N/A
CG3071	4	Male	1	Rep2	15
CG3071	4	Male	1	Rep3	83
CG3071	5	Male	1	Rep1	53
CG3071	5	Male	1	Rep2	83
CG3071	5	Male	1	Rep3	90
CG3071	6	Male	1	Rep1	50
CG3071	6	Male	1	Rep2	66
CG3071	6	Male	1	Rep3	69
CG3071	7	Male	1	Rep1	N/A
CG3071	7	Male	1	Rep2	48
CG3071	7	Male	1	Rep3	53
CG3071	8	Male	1	Rep1	48
CG3071	8	Male	1	Rep2	76
CG3071	8	Male	1	Rep3	83
CG3071	9	Male	1	Rep1	53
CG3071	9	Male	1	Rep2	53
CG3071	9	Male	1	Rep3	66
CG3071	10	Male	1	Rep1	53
CG3071	10	Male	1	Rep2	62
CG3071	10	Male	1	Rep3	83
CG3071	11	Male	1	Rep1	51
CG3071	11	Male	1	Rep2	57
CG3071	11	Male	1	Rep3	76
CG3071	12	Male	1	Rep1	62
CG3071	12	Male	1	Rep2	62
CG3071	12	Male	1	Rep3	83
CG3071	13	Male	1	Rep1	43
CG3071	13	Male	1	Rep2	53
CG3071	13	Male	1	Rep3	90
CG3071	14	Male	1	Rep1	51
CG3071	14	Male	1	Rep2	69
CG3071	14	Male	1	Rep3	94
CG3071	15	Male	1	Rep1	34
CG3071	15	Male	1	Rep2	53
CG3071	15	Male	1	Rep3	53
CG3071	16	Male	1	Rep1	24
CG3071	16	Male	1	Rep2	36
CG3071	16	Male	1	Rep3	85
CG3071	17	Male	1	Rep1	76
CG3071	17	Male	1	Rep2	90
CG3071	17	Male	1	Rep3	94
CG3071	18	Male	1	Rep1	48
CG3071	18	Male	1	Rep2	62
CG3071	18	Male	1	Rep3	78
CG3071	19	Male	1	Rep1	34
CG3071	19	Male	1	Rep2	50
CG3071	19	Male	1	Rep3	53
CG3071	20	Male	1	Rep1	45
CG3071	20	Male	1	Rep2	62
CG3071	20	Male	1	Rep3	62
CG3071	21	Male	1	Rep1	34
CG3071	21	Male	1	Rep2	45
CG3071	21	Male	1	Rep3	65
CG3071	22	Male	1	Rep1	55
CG3071	22	Male	1	Rep2	73
CG3071	22	Male	1	Rep3	90
CG3071	23	Male	1	Rep1	29
CG3071	23	Male	1	Rep2	48
CG3071	23	Male	1	Rep3	83
CG3071	24	Male	1	Rep1	76
CG3071	24	Male	1	Rep2	90
CG3071	24	Male	1	Rep3	90
CG3071	25	Male	1	Rep1	65
CG3071	25	Male	1	Rep2	65
CG3071	25	Male	1	Rep3	90
CG3071	26	Male	1	Rep1	50
CG3071	26	Male	1	Rep2	80
CG3071	26	Male	1	Rep3	80
CG3071	27	Male	1	Rep1	45
CG3071	27	Male	1	Rep2	66
CG3071	27	Male	1	Rep3	76
CG3071	28	Male	1	Rep1	44
CG3071	28	Male	1	Rep2	48
CG3071	28	Male	1	Rep3	69
CG3071	29	Male	1	Rep1	N/A
CG3071	29	Male	1	Rep2	34
CG3071	29	Male	1	Rep3	62
CG3071	30	Male	1	Rep1	83
CG3071	30	Male	1	Rep2	94
CG3071	30	Male	1	Rep3	94
CG3071	31	Male	1	Rep1	51
CG3071	31	Male	1	Rep2	69
CG3071	31	Male	1	Rep3	90
CG3071	32	Male	1	Rep1	43
CG3071	32	Male	1	Rep2	62
CG3071	32	Male	1	Rep3	83
CG3071	33	Male	1	Rep1	90
CG3071	33	Male	1	Rep2	94
CG3071	33	Male	1	Rep3	94
CG3071	34	Male	1	Rep1	87
CG3071	34	Male	1	Rep2	90
CG3071	34	Male	1	Rep3	94
CG3071	35	Male	1	Rep1	69
CG3071	35	Male	1	Rep2	73
CG3071	35	Male	1	Rep3	83
CG3071	36	Male	1	Rep1	23
CG3071	36	Male	1	Rep2	48
CG3071	36	Male	1	Rep3	71
CG3071	37	Male	1	Rep1	N/A
CG3071	37	Male	1	Rep2	62
CG3071	37	Male	1	Rep3	90
CG3071	38	Male	1	Rep1	27
CG3071	38	Male	1	Rep2	62
CG3071	38	Male	1	Rep3	90
CG3071	39	Male	1	Rep1	90
CG3071	39	Male	1	Rep2	90
CG3071	39	Male	1	Rep3	94
CG3071	40	Male	1	Rep1	45
CG3071	40	Male	1	Rep2	62
CG3071	40	Male	1	Rep3	83
CG3071	41	Male	1	Rep1	N/A
CG3071	41	Male	1	Rep2	62
CG3071	41	Male	1	Rep3	90
CG3071	42	Male	1	Rep1	N/A
CG3071	42	Male	1	Rep2	65
CG3071	42	Male	1	Rep3	76
CG3071	43	Male	1	Rep1	80
CG3071	43	Male	1	Rep2	90
CG3071	43	Male	1	Rep3	90
CG3071	44	Male	1	Rep1	45
CG3071	44	Male	1	Rep2	55
CG3071	44	Male	1	Rep3	73
CG3071	45	Male	1	Rep1	41
CG3071	45	Male	1	Rep2	50
CG3071	45	Male	1	Rep3	69
CG3071	46	Male	1	Rep1	44
CG3071	46	Male	1	Rep2	51
CG3071	46	Male	1	Rep3	76
CG3071	47	Male	1	Rep1	80
CG3071	47	Male	1	Rep2	83
CG3071	47	Male	1	Rep3	94
CG3071	48	Male	1	Rep1	N/A
CG3071	48	Male	1	Rep2	38
CG3071	48	Male	1	Rep3	53
dnc	1	Male	1	Rep1	41
dnc	1	Male	1	Rep2	55
dnc	1	Male	1	Rep3	58
dnc	2	Male	1	Rep1	53
dnc	2	Male	1	Rep2	62
dnc	2	Male	1	Rep3	73
dnc	3	Male	1	Rep1	38
dnc	3	Male	1	Rep2	38
dnc	3	Male	1	Rep3	41
dnc	4	Male	1	Rep1	41
dnc	4	Male	1	Rep2	N/A
dnc	4	Male	1	Rep3	65
dnc	5	Male	1	Rep1	59
dnc	5	Male	1	Rep2	69
dnc	5	Male	1	Rep3	76
dnc	6	Male	1	Rep1	8
dnc	6	Male	1	Rep2	41
dnc	6	Male	1	Rep3	48
dnc	7	Male	1	Rep1	71
dnc	7	Male	1	Rep2	76
dnc	7	Male	1	Rep3	76
dnc	8	Male	1	Rep1	N/A
dnc	8	Male	1	Rep2	62
dnc	8	Male	1	Rep3	76
dnc	9	Male	1	Rep1	N/A
dnc	9	Male	1	Rep2	62
dnc	9	Male	1	Rep3	64
dnc	10	Male	1	Rep1	10
dnc	10	Male	1	Rep2	N/A
dnc	10	Male	1	Rep3	27
dnc	11	Male	1	Rep1	27
dnc	11	Male	1	Rep2	N/A
dnc	11	Male	1	Rep3	87
dnc	12	Male	1	Rep1	36
dnc	12	Male	1	Rep2	53
dnc	12	Male	1	Rep3	76
dnc	13	Male	1	Rep1	51
dnc	13	Male	1	Rep2	51
dnc	13	Male	1	Rep3	58
dnc	14	Male	1	Rep1	45
dnc	14	Male	1	Rep2	57
dnc	14	Male	1	Rep3	62
dnc	15	Male	1	Rep1	N/A
dnc	15	Male	1	Rep2	48
dnc	15	Male	1	Rep3	69
dnc	16	Male	1	Rep1	38
dnc	16	Male	1	Rep2	53
dnc	16	Male	1	Rep3	76
dnc	17	Male	1	Rep1	55
dnc	17	Male	1	Rep2	78
dnc	17	Male	1	Rep3	87
dnc	18	Male	1	Rep1	34
dnc	18	Male	1	Rep2	69
dnc	18	Male	1	Rep3	69
dnc	19	Male	1	Rep1	N/A
dnc	19	Male	1	Rep2	69
dnc	19	Male	1	Rep3	78
dnc	20	Male	1	Rep1	48
dnc	20	Male	1	Rep2	69
dnc	20	Male	1	Rep3	73
dnc	21	Male	1	Rep1	N/A
dnc	21	Male	1	Rep2	38
dnc	21	Male	1	Rep3	62
dnc	22	Male	1	Rep1	51
dnc	22	Male	1	Rep2	51
dnc	22	Male	1	Rep3	51
dnc	23	Male	1	Rep1	N/A
dnc	23	Male	1	Rep2	48
dnc	23	Male	1	Rep3	76
dnc	24	Male	1	Rep1	76
dnc	24	Male	1	Rep2	83
dnc	24	Male	1	Rep3	90
dnc	25	Male	1	Rep1	6
dnc	25	Male	1	Rep2	48
dnc	25	Male	1	Rep3	51
dnc	26	Male	1	Rep1	53
dnc	26	Male	1	Rep2	66
dnc	26	Male	1	Rep3	76
dnc	27	Male	1	Rep1	62
dnc	27	Male	1	Rep2	73
dnc	27	Male	1	Rep3	83
dnc	28	Male	1	Rep1	2
dnc	28	Male	1	Rep2	43
dnc	28	Male	1	Rep3	53
dnc	29	Male	1	Rep1	N/A
dnc	29	Male	1	Rep2	51
dnc	29	Male	1	Rep3	51
dnc	30	Male	1	Rep1	38
dnc	30	Male	1	Rep2	55
dnc	30	Male	1	Rep3	83
dnc	31	Male	1	Rep1	62
dnc	31	Male	1	Rep2	69
dnc	31	Male	1	Rep3	91
dnc	32	Male	1	Rep1	2
dnc	32	Male	1	Rep2	48
dnc	32	Male	1	Rep3	76
dnc	33	Male	1	Rep1	45
dnc	33	Male	1	Rep2	65
dnc	33	Male	1	Rep3	83
dnc	34	Male	1	Rep1	50
dnc	34	Male	1	Rep2	76
dnc	34	Male	1	Rep3	83
dnc	35	Male	1	Rep1	41
dnc	35	Male	1	Rep2	50
dnc	35	Male	1	Rep3	53
dnc	36	Male	1	Rep1	44
dnc	36	Male	1	Rep2	55
dnc	36	Male	1	Rep3	71
dnc	37	Male	1	Rep1	N/A
dnc	37	Male	1	Rep2	62
dnc	37	Male	1	Rep3	69
dnc	38	Male	1	Rep1	41
dnc	38	Male	1	Rep2	62
dnc	38	Male	1	Rep3	73
dnc	39	Male	1	Rep1	62
dnc	39	Male	1	Rep2	69
dnc	39	Male	1	Rep3	80
dnc	40	Male	1	Rep1	62
dnc	40	Male	1	Rep2	76
dnc	40	Male	1	Rep3	90
dnc	41	Male	1	Rep1	38
dnc	41	Male	1	Rep2	76
dnc	41	Male	1	Rep3	90
dnc	42	Male	1	Rep1	N/A
dnc	42	Male	1	Rep2	69
dnc	42	Male	1	Rep3	78
dnc	43	Male	1	Rep1	31
dnc	43	Male	1	Rep2	64
dnc	43	Male	1	Rep3	83
dnc	44	Male	1	Rep1	13
dnc	44	Male	1	Rep2	N/A
dnc	44	Male	1	Rep3	31
dnc	45	Male	1	Rep1	45
dnc	45	Male	1	Rep2	83
dnc	45	Male	1	Rep3	94
dnc	46	Male	1	Rep1	41
dnc	46	Male	1	Rep2	51
dnc	46	Male	1	Rep3	69
dnc	47	Male	1	Rep1	53
dnc	47	Male	1	Rep2	80
dnc	47	Male	1	Rep3	83
dnc	48	Male	1	Rep1	62
dnc	48	Male	1	Rep2	69
dnc	48	Male	1	Rep3	73
msn	1	Male	1	Rep1	13
msn	1	Male	1	Rep2	43
msn	1	Male	1	Rep3	53
msn	2	Male	1	Rep1	13
msn	2	Male	1	Rep2	73
msn	2	Male	1	Rep3	83
msn	3	Male	1	Rep1	13
msn	3	Male	1	Rep2	69
msn	3	Male	1	Rep3	90
msn	4	Male	1	Rep1	51
msn	4	Male	1	Rep2	55
msn	4	Male	1	Rep3	87
msn	5	Male	1	Rep1	48
msn	5	Male	1	Rep2	83
msn	5	Male	1	Rep3	83
msn	6	Male	1	Rep1	38
msn	6	Male	1	Rep2	62
msn	6	Male	1	Rep3	90
msn	7	Male	1	Rep1	13
msn	7	Male	1	Rep2	23
msn	7	Male	1	Rep3	65
msn	8	Male	1	Rep1	80
msn	8	Male	1	Rep2	83
msn	8	Male	1	Rep3	90
msn	9	Male	1	Rep1	45
msn	9	Male	1	Rep2	71
msn	9	Male	1	Rep3	76
msn	10	Male	1	Rep1	6
msn	10	Male	1	Rep2	45
msn	10	Male	1	Rep3	53
msn	11	Male	1	Rep1	N/A
msn	11	Male	1	Rep2	27
msn	11	Male	1	Rep3	85
msn	12	Male	1	Rep1	20
msn	12	Male	1	Rep2	34
msn	12	Male	1	Rep3	53
msn	13	Male	1	Rep1	N/A
msn	13	Male	1	Rep2	66
msn	13	Male	1	Rep3	83
msn	14	Male	1	Rep1	69
msn	14	Male	1	Rep2	69
msn	14	Male	1	Rep3	90
msn	15	Male	1	Rep1	23
msn	15	Male	1	Rep2	59
msn	15	Male	1	Rep3	94
msn	16	Male	1	Rep1	83
msn	16	Male	1	Rep2	83
msn	16	Male	1	Rep3	94
msn	17	Male	1	Rep1	N/A
msn	17	Male	1	Rep2	80
msn	17	Male	1	Rep3	90
msn	18	Male	1	Rep1	2
msn	18	Male	1	Rep2	44
msn	18	Male	1	Rep3	85
msn	19	Male	1	Rep1	24
msn	19	Male	1	Rep2	34
msn	19	Male	1	Rep3	69
msn	20	Male	1	Rep1	34
msn	20	Male	1	Rep2	36
msn	20	Male	1	Rep3	76
msn	21	Male	1	Rep1	2
msn	21	Male	1	Rep2	27
msn	21	Male	1	Rep3	41
msn	22	Male	1	Rep1	20
msn	22	Male	1	Rep2	83
msn	22	Male	1	Rep3	94
msn	23	Male	1	Rep1	69
msn	23	Male	1	Rep2	80
msn	23	Male	1	Rep3	90
msn	24	Male	1	Rep1	20
msn	24	Male	1	Rep2	69
msn	24	Male	1	Rep3	90
msn	25	Male	1	Rep1	16
msn	25	Male	1	Rep2	78
msn	25	Male	1	Rep3	94
msn	26	Male	1	Rep1	N/A
msn	26	Male	1	Rep2	N/A
msn	26	Male	1	Rep3	N/A
msn	27	Male	1	Rep1	41
msn	27	Male	1	Rep2	76
msn	27	Male	1	Rep3	83
msn	28	Male	1	Rep1	41
msn	28	Male	1	Rep2	83
msn	28	Male	1	Rep3	83
msn	29	Male	1	Rep1	N/A
msn	29	Male	1	Rep2	34
msn	29	Male	1	Rep3	51
msn	30	Male	1	Rep1	2
msn	30	Male	1	Rep2	41
msn	30	Male	1	Rep3	69
msn	31	Male	1	Rep1	41
msn	31	Male	1	Rep2	90
msn	31	Male	1	Rep3	90
msn	32	Male	1	Rep1	34
msn	32	Male	1	Rep2	34
msn	32	Male	1	Rep3	85
msn	33	Male	1	Rep1	10
msn	33	Male	1	Rep2	62
msn	33	Male	1	Rep3	66
msn	34	Male	1	Rep1	2
msn	34	Male	1	Rep2	N/A
msn	34	Male	1	Rep3	53
msn	35	Male	1	Rep1	62
msn	35	Male	1	Rep2	69
msn	35	Male	1	Rep3	76
msn	36	Male	1	Rep1	6
msn	36	Male	1	Rep2	48
msn	36	Male	1	Rep3	65
msn	37	Male	1	Rep1	N/A
msn	37	Male	1	Rep2	34
msn	37	Male	1	Rep3	62
msn	38	Male	1	Rep1	31
msn	38	Male	1	Rep2	48
msn	38	Male	1	Rep3	57
msn	39	Male	1	Rep1	N/A
msn	39	Male	1	Rep2	58
msn	39	Male	1	Rep3	80
msn	40	Male	1	Rep1	N/A
msn	40	Male	1	Rep2	78
msn	40	Male	1	Rep3	83
msn	41	Male	1	Rep1	76
msn	41	Male	1	Rep2	83
msn	41	Male	1	Rep3	83
msn	42	Male	1	Rep1	53
msn	42	Male	1	Rep2	90
msn	42	Male	1	Rep3	90
msn	43	Male	1	Rep1	62
msn	43	Male	1	Rep2	83
msn	43	Male	1	Rep3	85
msn	44	Male	1	Rep1	20
msn	44	Male	1	Rep2	N/A
msn	44	Male	1	Rep3	53
msn	45	Male	1	Rep1	30
msn	45	Male	1	Rep2	41
msn	45	Male	1	Rep3	83
msn	46	Male	1	Rep1	13
msn	46	Male	1	Rep2	43
msn	46	Male	1	Rep3	48
msn	47	Male	1	Rep1	N/A
msn	47	Male	1	Rep2	76
msn	47	Male	1	Rep3	90
msn	48	Male	1	Rep1	41
msn	48	Male	1	Rep2	87
msn	48	Male	1	Rep3	91
sra	1	Male	1	Rep1	58
sra	1	Male	1	Rep2	69
sra	1	Male	1	Rep3	80
sra	2	Male	1	Rep1	41
sra	2	Male	1	Rep2	69
sra	2	Male	1	Rep3	80
sra	3	Male	1	Rep1	N/A
sra	3	Male	1	Rep2	27
sra	3	Male	1	Rep3	34
sra	4	Male	1	Rep1	41
sra	4	Male	1	Rep2	48
sra	4	Male	1	Rep3	53
sra	5	Male	1	Rep1	N/A
sra	5	Male	1	Rep2	6
sra	5	Male	1	Rep3	51
sra	6	Male	1	Rep1	20
sra	6	Male	1	Rep2	N/A
sra	6	Male	1	Rep3	45
sra	7	Male	1	Rep1	38
sra	7	Male	1	Rep2	41
sra	7	Male	1	Rep3	53
sra	8	Male	1	Rep1	51
sra	8	Male	1	Rep2	51
sra	8	Male	1	Rep3	69
sra	9	Male	1	Rep1	N/A
sra	9	Male	1	Rep2	N/A
sra	9	Male	1	Rep3	N/A
sra	10	Male	1	Rep1	N/A
sra	10	Male	1	Rep2	53
sra	10	Male	1	Rep3	94
sra	11	Male	1	Rep1	51
sra	11	Male	1	Rep2	N/A
sra	11	Male	1	Rep3	53
sra	12	Male	1	Rep1	N/A
sra	12	Male	1	Rep2	66
sra	12	Male	1	Rep3	90
sra	13	Male	1	Rep1	8
sra	13	Male	1	Rep2	34
sra	13	Male	1	Rep3	76
sra	14	Male	1	Rep1	76
sra	14	Male	1	Rep2	83
sra	14	Male	1	Rep3	83
sra	15	Male	1	Rep1	30
sra	15	Male	1	Rep2	62
sra	15	Male	1	Rep3	62
sra	16	Male	1	Rep1	N/A
sra	16	Male	1	Rep2	36
sra	16	Male	1	Rep3	80
sra	17	Male	1	Rep1	34
sra	17	Male	1	Rep2	64
sra	17	Male	1	Rep3	90
sra	18	Male	1	Rep1	53
sra	18	Male	1	Rep2	62
sra	18	Male	1	Rep3	69
sra	19	Male	1	Rep1	22
sra	19	Male	1	Rep2	N/A
sra	19	Male	1	Rep3	76
sra	20	Male	1	Rep1	17
sra	20	Male	1	Rep2	34
sra	20	Male	1	Rep3	58
sra	21	Male	1	Rep1	N/A
sra	21	Male	1	Rep2	80
sra	21	Male	1	Rep3	94
sra	22	Male	1	Rep1	69
sra	22	Male	1	Rep2	69
sra	22	Male	1	Rep3	83
sra	23	Male	1	Rep1	57
sra	23	Male	1	Rep2	62
sra	23	Male	1	Rep3	76
sra	24	Male	1	Rep1	N/A
sra	24	Male	1	Rep2	43
sra	24	Male	1	Rep3	69
sra	25	Male	1	Rep1	41
sra	25	Male	1	Rep2	43
sra	25	Male	1	Rep3	90
sra	26	Male	1	Rep1	48
sra	26	Male	1	Rep2	48
sra	26	Male	1	Rep3	51
sra	27	Male	1	Rep1	36
sra	27	Male	1	Rep2	80
sra	27	Male	1	Rep3	83
sra	28	Male	1	Rep1	20
sra	28	Male	1	Rep2	41
sra	28	Male	1	Rep3	62
sra	29	Male	1	Rep1	36
sra	29	Male	1	Rep2	36
sra	29	Male	1	Rep3	41
sra	30	Male	1	Rep1	34
sra	30	Male	1	Rep2	51
sra	30	Male	1	Rep3	N/A
sra	31	Male	1	Rep1	38
sra	31	Male	1	Rep2	94
sra	31	Male	1	Rep3	94
sra	32	Male	1	Rep1	50
sra	32	Male	1	Rep2	53
sra	32	Male	1	Rep3	94
sra	33	Male	1	Rep1	57
sra	33	Male	1	Rep2	69
sra	33	Male	1	Rep3	83
sra	34	Male	1	Rep1	13
sra	34	Male	1	Rep2	48
sra	34	Male	1	Rep3	83
sra	35	Male	1	Rep1	16
sra	35	Male	1	Rep2	N/A
sra	35	Male	1	Rep3	85
sra	36	Male	1	Rep1	N/A
sra	36	Male	1	Rep2	48
sra	36	Male	1	Rep3	83
sra	37	Male	1	Rep1	27
sra	37	Male	1	Rep2	29
sra	37	Male	1	Rep3	34
sra	38	Male	1	Rep1	30
sra	38	Male	1	Rep2	N/A
sra	38	Male	1	Rep3	55
sra	39	Male	1	Rep1	N/A
sra	39	Male	1	Rep2	34
sra	39	Male	1	Rep3	53
sra	40	Male	1	Rep1	N/A
sra	40	Male	1	Rep2	27
sra	40	Male	1	Rep3	29
sra	41	Male	1	Rep1	N/A
sra	41	Male	1	Rep2	80
sra	41	Male	1	Rep3	87
sra	42	Male	1	Rep1	2
sra	42	Male	1	Rep2	41
sra	42	Male	1	Rep3	41
sra	43	Male	1	Rep1	N/A
sra	43	Male	1	Rep2	N/A
sra	43	Male	1	Rep3	N/A
sra	44	Male	1	Rep1	41
sra	44	Male	1	Rep2	48
sra	44	Male	1	Rep3	51
sra	45	Male	1	Rep1	48
sra	45	Male	1	Rep2	83
sra	45	Male	1	Rep3	90
sra	46	Male	1	Rep1	34
sra	46	Male	1	Rep2	34
sra	46	Male	1	Rep3	90
sra	47	Male	1	Rep1	2
sra	47	Male	1	Rep2	2
sra	47	Male	1	Rep3	41
sra	48	Male	1	Rep1	83
sra	48	Male	1	Rep2	83
sra	48	Male	1	Rep3	94
KK control	1	Male	1	Rep1	62
KK control	1	Male	1	Rep2	71
KK control	1	Male	1	Rep3	71
KK control	2	Male	1	Rep1	44
KK control	2	Male	1	Rep2	65
KK control	2	Male	1	Rep3	65
KK control	3	Male	1	Rep1	29
KK control	3	Male	1	Rep2	57
KK control	3	Male	1	Rep3	66
KK control	4	Male	1	Rep1	N/A
KK control	4	Male	1	Rep2	36
KK control	4	Male	1	Rep3	48
KK control	5	Male	1	Rep1	2
KK control	5	Male	1	Rep2	43
KK control	5	Male	1	Rep3	53
KK control	6	Male	1	Rep1	30
KK control	6	Male	1	Rep2	44
KK control	6	Male	1	Rep3	69
KK control	7	Male	1	Rep1	24
KK control	7	Male	1	Rep2	34
KK control	7	Male	1	Rep3	41
KK control	8	Male	1	Rep1	N/A
KK control	8	Male	1	Rep2	66
KK control	8	Male	1	Rep3	83
KK control	9	Male	1	Rep1	N/A
KK control	9	Male	1	Rep2	76
KK control	9	Male	1	Rep3	83
KK control	10	Male	1	Rep1	45
KK control	10	Male	1	Rep2	80
KK control	10	Male	1	Rep3	83
KK control	11	Male	1	Rep1	69
KK control	11	Male	1	Rep2	73
KK control	11	Male	1	Rep3	85
KK control	12	Male	1	Rep1	64
KK control	12	Male	1	Rep2	72
KK control	12	Male	1	Rep3	76
KK control	13	Male	1	Rep1	N/A
KK control	13	Male	1	Rep2	N/A
KK control	13	Male	1	Rep3	N/A
KK control	14	Male	1	Rep1	29
KK control	14	Male	1	Rep2	62
KK control	14	Male	1	Rep3	69
KK control	15	Male	1	Rep1	2
KK control	15	Male	1	Rep2	69
KK control	15	Male	1	Rep3	83
KK control	16	Male	1	Rep1	31
KK control	16	Male	1	Rep2	71
KK control	16	Male	1	Rep3	83
KK control	17	Male	1	Rep1	34
KK control	17	Male	1	Rep2	41
KK control	17	Male	1	Rep3	71
KK control	18	Male	1	Rep1	N/A
KK control	18	Male	1	Rep2	71
KK control	18	Male	1	Rep3	83
KK control	19	Male	1	Rep1	34
KK control	19	Male	1	Rep2	34
KK control	19	Male	1	Rep3	78
KK control	20	Male	1	Rep1	20
KK control	20	Male	1	Rep2	65
KK control	20	Male	1	Rep3	83
KK control	21	Male	1	Rep1	N/A
KK control	21	Male	1	Rep2	69
KK control	21	Male	1	Rep3	90
KK control	22	Male	1	Rep1	76
KK control	22	Male	1	Rep2	80
KK control	22	Male	1	Rep3	83
KK control	23	Male	1	Rep1	N/A
KK control	23	Male	1	Rep2	80
KK control	23	Male	1	Rep3	83
KK control	24	Male	1	Rep1	69
KK control	24	Male	1	Rep2	73
KK control	24	Male	1	Rep3	76
KK control	25	Male	1	Rep1	29
KK control	25	Male	1	Rep2	41
KK control	25	Male	1	Rep3	69
KK control	26	Male	1	Rep1	34
KK control	26	Male	1	Rep2	43
KK control	26	Male	1	Rep3	78
KK control	27	Male	1	Rep1	50
KK control	27	Male	1	Rep2	N/A
KK control	27	Male	1	Rep3	69
KK control	28	Male	1	Rep1	22
KK control	28	Male	1	Rep2	69
KK control	28	Male	1	Rep3	90
KK control	29	Male	1	Rep1	20
KK control	29	Male	1	Rep2	62
KK control	29	Male	1	Rep3	80
KK control	30	Male	1	Rep1	48
KK control	30	Male	1	Rep2	58
KK control	30	Male	1	Rep3	65
KK control	31	Male	1	Rep1	36
KK control	31	Male	1	Rep2	48
KK control	31	Male	1	Rep3	48
KK control	32	Male	1	Rep1	55
KK control	32	Male	1	Rep2	62
KK control	32	Male	1	Rep3	85
KK control	33	Male	1	Rep1	69
KK control	33	Male	1	Rep2	71
KK control	33	Male	1	Rep3	76
KK control	34	Male	1	Rep1	N/A
KK control	34	Male	1	Rep2	59
KK control	34	Male	1	Rep3	62
KK control	35	Male	1	Rep1	45
KK control	35	Male	1	Rep2	48
KK control	35	Male	1	Rep3	90
KK control	36	Male	1	Rep1	53
KK control	36	Male	1	Rep2	62
KK control	36	Male	1	Rep3	69
KK control	37	Male	1	Rep1	62
KK control	37	Male	1	Rep2	78
KK control	37	Male	1	Rep3	87
KK control	38	Male	1	Rep1	N/A
KK control	38	Male	1	Rep2	48
KK control	38	Male	1	Rep3	53
KK control	39	Male	1	Rep1	20
KK control	39	Male	1	Rep2	62
KK control	39	Male	1	Rep3	66
KK control	40	Male	1	Rep1	20
KK control	40	Male	1	Rep2	78
KK control	40	Male	1	Rep3	85
KK control	41	Male	1	Rep1	N/A
KK control	41	Male	1	Rep2	62
KK control	41	Male	1	Rep3	65
KK control	42	Male	1	Rep1	62
KK control	42	Male	1	Rep2	76
KK control	42	Male	1	Rep3	80
KK control	43	Male	1	Rep1	45
[truncated: 16,070 more rows]

## Sheet: Table S6
Gene	Replicate	Block	Productivity
CycE	1	1	132.333
CycE	5	1	70.6667
CycE	8	1	144
CycE	11	1	173
CycE	15	1	119
CycE	19	1	101.333
CycE	22	1	156
CycE	26	1	119.5
CycE	29	1	135.5
CycE	33	1	123
CycE	37	1	182
CycE	41	1	65.3333
CycE	46	1	124.333
CG3704	2	1	148.333
CG3704	5	1	107.333
CG3704	8	1	142.5
CG3704	13	1	175.167
CG3704	17	1	173.333
CG3704	21	1	160.5
CG3704	26	1	171.833
CG3704	30	1	236.5
CG3704	34	1	147
CG3704	38	1	235
CG3704	41	1	183.833
CG3704	44	1	253
CG3704	48	1	214.667
Eip75B	3	1	110.167
Eip75B	7	1	138
Eip75B	11	1	165.667
Eip75B	16	1	63.6667
Eip75B	20	1	132.833
Eip75B	24	1	111.667
Eip75B	27	1	192.167
Eip75B	31	1	172.167
Eip75B	34	1	180.667
Eip75B	38	1	117
Eip75B	41	1	149.667
Eip75B	44	1	205
Eip75B	48	1	159.833
MED22	4	1	177.5
MED22	8	1	232
MED22	11	1	103.333
MED22	16	1	137.667
MED22	20	1	147.5
MED22	23	1	76.6667
MED22	27	1	112.333
MED22	31	1	193.5
MED22	35	1	143.833
MED22	39	1	134
MED22	43	1	138.333
MED22	46	1	155.333
MED22	48	1	107.833
Nmd3	1	1	139.167
Nmd3	4	1	64
Nmd3	8	1	181.5
Nmd3	12	1	167.167
Nmd3	17	1	158.667
Nmd3	21	1	191.5
Nmd3	25	1	113.667
Nmd3	28	1	197.333
Nmd3	31	1	147.333
Nmd3	35	1	89.6667
Nmd3	39	1	247
Nmd3	42	1	136.333
Nmd3	46	1	93.6667
piwi	2	1	201.667
piwi	5	1	184.667
piwi	9	1	154.667
piwi	13	1	218.333
piwi	17	1	188.833
piwi	21	1	220.667
piwi	24	1	214.833
piwi	29	1	186.333
piwi	33	1	186.667
piwi	38	1	147.5
piwi	41	1	78.8333
piwi	44	1	160.333
piwi	47	1	107.167
sgg	1	1	194
sgg	5	1	166.667
sgg	9	1	193.667
sgg	12	1	129.833
sgg	16	1	120.167
sgg	20	1	174.167
sgg	23	1	144.333
sgg	27	1	124.833
sgg	31	1	202.5
sgg	36	1	107.333
sgg	40	1	184.5
sgg	43	1	139.333
sgg	47	1	255
capu	2	1	213
capu	6	1	163.667
capu	10	1	213
capu	13	1	234.5
capu	18	1	115.5
capu	21	1	126.333
capu	25	1	182.333
capu	30	1	88.8333
capu	33	1	217.667
capu	36	1	70.6667
capu	39	1	191.833
capu	43	1	110
capu	48	1	115
sov	3	1	96.3333
sov	7	1	207.333
sov	11	1	134.667
sov	15	1	171.667
sov	20	1	155.333
sov	23	1	173.167
sov	28	1	190.667
sov	32	1	173.667
sov	36	1	176.333
sov	39	1	202.667
sov	42	1	201.167
sov	45	1	237.667
sov	48	1	189.333
CG3071	3	1	174.167
CG3071	7	1	96.8333
CG3071	11	1	148.667
CG3071	14	1	186.667
CG3071	17	1	230
CG3071	21	1	247.667
CG3071	25	1	168.667
CG3071	28	1	144.333
CG3071	31	1	153.167
CG3071	36	1	184.833
CG3071	39	1	150
CG3071	42	1	212.333
CG3071	46	1	191
dnc	1	1	196.333
dnc	4	1	164
dnc	8	1	77.3333
dnc	13	1	217.333
dnc	17	1	243.5
dnc	22	1	238
dnc	25	1	201.333
dnc	29	1	156
dnc	33	1	178.333
dnc	36	1	135.667
dnc	40	1	95.5
dnc	42	1	141.833
dnc	46	1	156.667
msn	4	1	170.833
msn	7	1	199.667
msn	11	1	169.333
msn	15	1	120.5
msn	18	1	120.5
msn	22	1	129.667
msn	25	1	150.167
msn	29	1	132.667
msn	32	1	98
msn	36	1	242.5
msn	39	1	216.667
msn	42	1	133.333
msn	45	1	176.833
sra	1	1	162.667
sra	5	1	166.167
sra	8	1	203.667
sra	11	1	188.5
sra	15	1	213.667
sra	20	1	193
sra	23	1	149.333
sra	26	1	155.667
sra	30	1	219.667
sra	35	1	119
sra	38	1	146.333
sra	41	1	170.333
sra	44	1	130
KK control	2	1	134
KK control	6	1	221
KK control	10	1	167.333
KK control	13	1	209.333
KK control	17	1	127.333
KK control	20	1	214.833
KK control	22	1	146.667
KK control	27	1	146.333
KK control	30	1	189
KK control	34	1	143.667
KK control	37	1	137.667
KK control	41	1	136.333
KK control	46	1	100.167
abo	3	2	95.6667
abo	8	2	58
abo	12	2	145.667
abo	15	2	122.333
abo	18	2	132.667
abo	23	2	116
abo	25	2	108.333
abo	28	2	171.667
abo	32	2	143.667
abo	36	2	135.333
abo	39	2	156
abo	42	2	135
abo	46	2	113
CG3326	2	2	137
CG3326	7	2	168.333
CG3326	11	2	132.667
CG3326	16	2	124
CG3326	17	2	118
CG3326	21	2	147.333
CG3326	24	2	167.667
CG3326	27	2	131
CG3326	30	2	0
CG3326	33	2	121.333
CG3326	39	2	149.333
CG3326	43	2	84.6667
CG3326	47	2	96.3333
CG4452	4	2	127.667
CG4452	8	2	65.6667
CG4452	9	2	66
CG4452	13	2	89.6667
CG4452	18	2	92.6667
CG4452	24	2	61
CG4452	27	2	127
CG4452	30	2	110.667
CG4452	34	2	84.6667
CG4452	37	2	140.333
CG4452	40	2	37.6667
CG4452	44	2	127.667
CG4452	48	2	147
Dredd	2	2	136
Dredd	7	2	47.6667
Dredd	11	2	86.6667
Dredd	16	2	74
Dredd	21	2	108.667
Dredd	24	2	78.3333
Dredd	27	2	31
Dredd	30	2	62
Dredd	33	2	98.3333
Dredd	37	2	53.3333
Dredd	40	2	71.6667
Dredd	43	2	63.6667
Dredd	47	2	91.6667
wds	1	2	140.333
wds	5	2	110.333
wds	9	2	124
wds	13	2	135.667
wds	16	2	38.6667
wds	19	2	127
wds	22	2	132.667
wds	25	2	157.667
wds	30	2	97.6667
wds	33	2	131.333
wds	36	2	131.333
wds	40	2	108.667
wds	45	2	103.667
KK control	3	2	124.667
KK control	8	2	89
KK control	12	2	130.667
KK control	16	2	95.3333
KK control	19	2	145.333
KK control	22	2	115
KK control	26	2	92
KK control	29	2	95.3333
KK control	33	2	127
KK control	36	2	122.667
KK control	40	2	111.333
KK control	43	2	119.667
KK control	47	2	148
CG13760	1	3	113.333
CG13760	4	3	34.3333
CG13760	8	3	119
CG13760	11	3	59.6667
CG13760	15	3	122.667
CG13760	19	3	96.6667
CG13760	24	3	67
CG13760	26	3	80.3333
CG13760	31	3	84.3333
CG13760	34	3	55.3333
CG13760	39	3	65.3333
CG13760	41	3	105
CG13760	46	3	111.333
CG32809	2	3	49.6667
CG32809	5	3	158.333
CG32809	9	3	129
CG32809	12	3	81.6667
CG32809	17	3	133.333
CG32809	21	3	53
CG32809	24	3	117.667
CG32809	27	3	147
CG32809	32	3	33.6667
CG32809	34	3	91
CG32809	38	3	101.667
CG32809	41	3	129
CG32809	45	3	58
CG4281	3	3	116
CG4281	7	3	90.6667
CG4281	10	3	79.3333
CG4281	14	3	99
CG4281	19	3	85.3333
CG4281	23	3	149.667
CG4281	26	3	91
CG4281	29	3	87.3333
CG4281	33	3	93.6667
CG4281	36	3	93.6667
CG4281	40	3	134.667
CG4281	43	3	81.3333
CG4281	48	3	142
CG4554	1	3	85.3333
CG4554	5	3	58
CG4554	10	3	144
CG4554	14	3	77.6667
CG4554	17	3	80
CG4554	21	3	75.6667
CG4554	25	3	91.3333
CG4554	28	3	115
CG4554	32	3	108
CG4554	35	3	110.333
CG4554	38	3	79
CG4554	43	3	97.3333
CG4554	47	3	98.3333
CG7970	2	3	76.6667
CG7970	6	3	122
CG7970	10	3	103.333
CG7970	15	3	130.333
CG7970	19	3	148.333
CG7970	22	3	81
CG7970	25	3	53.3333
CG7970	29	3	101
CG7970	33	3	116
CG7970	38	3	46.3333
CG7970	41	3	114
CG7970	45	3	106.667
CG7970	48	3	66.3333
CG7971	3	3	34.6667
CG7971	7	3	35.3333
CG7971	12	3	30.6667
CG7971	17	3	22.3333
CG7971	21	3	34.6667
CG7971	25	3	26.6667
CG7971	30	3	23.6667
CG7971	33	3	39
CG7971	36	3	45
CG7971	40	3	20.3333
CG7971	42	3	41.6667
CG7971	45	3	21.3333
CG7971	48	3	23.3333
DAAM	1	3	105.667
DAAM	5	3	116
DAAM	9	3	72.6667
DAAM	14	3	120
DAAM	18	3	80.6667
DAAM	22	3	48
DAAM	25	3	129.333
DAAM	29	3	77.6667
DAAM	32	3	77
DAAM	34	3	172.333
DAAM	38	3	150.5
DAAM	42	3	83
DAAM	46	3	114.667
dx	2	3	85.6667
dx	7	3	52.6667
dx	10	3	90
dx	14	3	39.3333
dx	17	3	44.3333
dx	22	3	87.3333
dx	26	3	85.6667
dx	31	3	86.3333
dx	34	3	75.3333
dx	38	3	99
dx	41	3	136
dx	45	3	107.333
dx	48	3	77.3333
fs(1)N	1	3	105
fs(1)N	5	3	56.3333
fs(1)N	10	3	80.3333
fs(1)N	14	3	101.333
fs(1)N	18	3	134.333
fs(1)N	23	3	108.333
fs(1)N	27	3	121.667
fs(1)N	31	3	33
fs(1)N	34	3	56.6667
fs(1)N	37	3	146
fs(1)N	40	3	55.6667
fs(1)N	43	3	55
fs(1)N	46	3	73.3333
G9a	4	3	78
G9a	8	3	97
G9a	10	3	139.333
G9a	14	3	49.6667
G9a	19	3	131
G9a	23	3	65.6667
G9a	26	3	59
G9a	29	3	149.667
G9a	33	3	59.3333
G9a	37	3	106.333
G9a	40	3	132.667
G9a	44	3	97
G9a	47	3	98.6667
Klp67A	2	3	92
Klp67A	6	3	87.6667
Klp67A	11	3	103.333
Klp67A	15	3	89.6667
Klp67A	18	3	105
Klp67A	22	3	157
Klp67A	26	3	79
Klp67A	29	3	123
Klp67A	33	3	75.3333
Klp67A	34	3	71.3333
Klp67A	37	3	78
Klp67A	43	3	90
Klp67A	47	3	83.3333
ND-ACP	3	3	5
ND-ACP	7	3	2.66667
ND-ACP	12	3	2
ND-ACP	16	3	8
ND-ACP	19	3	8
ND-ACP	24	3	5.33333
ND-ACP	28	3	5.33333
ND-ACP	32	3	4
ND-ACP	35	3	0
ND-ACP	39	3	6.66667
ND-ACP	43	3	3
ND-ACP	46	3	2.66667
ND-ACP	48	3	3
RpL22	1	3	0
RpL22	5	3	0
RpL22	9	3	0
RpL22	14	3	0
RpL22	18	3	0
RpL22	22	3	0
RpL22	27	3	0
RpL22	31	3	0
RpL22	36	3	0
RpL22	39	3	0
RpL22	42	3	0
RpL22	44	3	0
RpL22	47	3	0
CG12018	4	3	60
CG12018	8	3	122.667
CG12018	11	3	82
CG12018	15	3	73.6667
CG12018	20	3	86.6667
CG12018	24	3	100.333
CG12018	28	3	95.3333
CG12018	31	3	111.667
CG12018	34	3	66
CG12018	38	3	80.6667
CG12018	41	3	122.667
CG12018	45	3	109.667
CG12018	48	3	80.3333
CG13933	1	3	53.6667
CG13933	5	3	63.3333
CG13933	9	3	27
CG13933	12	3	74
CG13933	16	3	98.6667
CG13933	21	3	63.6667
CG13933	24	3	103
CG13933	27	3	119.333
CG13933	31	3	63.3333
CG13933	35	3	92.6667
CG13933	40	3	73.3333
CG13933	42	3	59
CG13933	45	3	67
Hsl	2	3	69.3333
Hsl	7	3	88
Hsl	11	3	122.333
Hsl	16	3	69.3333
Hsl	19	3	107.667
Hsl	23	3	106.333
Hsl	28	3	88
Hsl	32	3	104
Hsl	35	3	69.3333
Hsl	39	3	67.3333
Hsl	42	3	68.3333
Hsl	44	3	98
Hsl	47	3	64
lama	1	3	54
lama	5	3	57
lama	9	3	65
lama	15	3	141.333
lama	18	3	61
lama	21	3	51.6667
lama	25	3	115.667
lama	29	3	100.333
lama	32	3	117.667
lama	35	3	83
lama	39	3	85.6667
lama	43	3	76
lama	46	3	91.3333
KK control	2	3	138
KK control	7	3	106.333
KK control	11	3	42.6667
KK control	15	3	106.333
KK control	18	3	72
KK control	22	3	100.333
KK control	27	3	90.3333
KK control	31	3	154
KK control	34	3	39.3333
KK control	38	3	132.333
KK control	41	3	105.333
KK control	44	3	116.5
KK control	47	3	92.6667
blw	1	4	0.333333
blw	5	4	1.33333
blw	8	4	3
blw	11	4	0.333333
blw	16	4	0
blw	18	4	0.333333
blw	23	4	0.666667
blw	27	4	0.666667
blw	30	4	0.666667
blw	34	4	0.333333
blw	37	4	0.333333
blw	41	4	1
blw	47	4	0.333333
Cdc7	2	4	97.6667
Cdc7	7	4	147.667
Cdc7	11	4	121.5
Cdc7	15	4	92
Cdc7	18	4	126.333
Cdc7	22	4	137
Cdc7	25	4	106.333
Cdc7	29	4	67
Cdc7	33	4	85
Cdc7	37	4	87.3333
Cdc7	40	4	101.333
Cdc7	43	4	103.667
Cdc7	48	4	126.667
CG14969	3	4	91.8333
CG14969	7	4	81.5
CG14969	11	4	80.1667
CG14969	16	4	97.3333
CG14969	20	4	113.333
CG14969	24	4	91
CG14969	25	4	72
CG14969	27	4	99.6667
CG14969	31	4	95
CG14969	34	4	87.1667
CG14969	37	4	80.3333
CG14969	41	4	97.8333
CG14969	46	4	90.3333
CG5254	1	4	73
CG5254	5	4	88.8333
CG5254	9	4	93.1667
CG5254	14	4	55.3333
CG5254	18	4	83.3333
CG5254	23	4	77
CG5254	27	4	90.3333
CG5254	32	4	101.167
CG5254	34	4	103
CG5254	38	4	38.6667
CG5254	41	4	93.1667
CG5254	45	4	72
CG5254	48	4	68.6667
Fdx1	2	4	96
Fdx1	6	4	99
Fdx1	10	4	119.667
Fdx1	14	4	90.6667
Fdx1	19	4	63.6667
Fdx1	24	4	90.6667
Fdx1	25	4	104.333
Fdx1	29	4	103
Fdx1	34	4	108.5
Fdx1	38	4	60
Fdx1	41	4	87.8333
Fdx1	44	4	71.6667
Fdx1	47	4	81.6667
l(1)G0004	1	4	94.8333
l(1)G0004	5	4	105
l(1)G0004	10	4	77.1667
l(1)G0004	14	4	118
l(1)G0004	17	4	59.8333
l(1)G0004	20	4	102.333
l(1)G0004	24	4	113.167
l(1)G0004	27	4	80.1667
l(1)G0004	31	4	94.6667
l(1)G0004	34	4	58.6667
l(1)G0004	38	4	87
l(1)G0004	43	4	108.5
l(1)G0004	47	4	85
pcx	3	4	135.167
pcx	8	4	85.1667
pcx	10	4	134
pcx	14	4	84.6667
pcx	19	4	94.6667
pcx	23	4	102
pcx	25	4	113.167
pcx	29	4	120.167
pcx	33	4	89.6667
pcx	36	4	119.667
pcx	39	4	122.667
pcx	42	4	116
pcx	45	4	118.5
pn	2	4	85.3333
pn	6	4	108.667
pn	11	4	105
pn	15	4	77.1667
pn	18	4	99.6667
pn	21	4	82.1667
pn	25	4	88.8333
pn	28	4	55.3333
pn	32	4	86
pn	35	4	100.5
pn	38	4	93.3333
pn	42	4	143.5
pn	46	4	158.333
TRAM	1	4	123.167
TRAM	4	4	87.6667
TRAM	8	4	54
TRAM	12	4	156.333
TRAM	16	4	74.6667
TRAM	19	4	85.3333
TRAM	24	4	155.333
TRAM	28	4	114
TRAM	33	4	113.333
TRAM	37	4	57.3333
TRAM	40	4	120.833
TRAM	44	4	77
TRAM	48	4	131.333
zf30c	1	4	144.167
zf30c	5	4	194.833
zf30c	9	4	195
zf30c	14	4	160.333
zf30c	19	4	191.667
zf30c	24	4	195
zf30c	28	4	173.833
zf30c	31	4	126.333
zf30c	34	4	117
zf30c	38	4	134
zf30c	41	4	111.333
zf30c	45	4	130.167
zf30c	48	4	153.333
GD Control	3	4	120.5
GD Control	7	4	130.667
GD Control	10	4	92
GD Control	14	4	105
GD Control	17	4	109.833
GD Control	21	4	98.8333
GD Control	24	4	123.667
GD Control	27	4	106.167
GD Control	31	4	121.667
GD Control	35	4	95.5
GD Control	38	4	125
GD Control	43	4	97
GD Control	47	4	135.5
CG18273	1	5	57.6667
CG18273	4	5	139.667
CG18273	8	5	42.3333
CG18273	12	5	103.167
CG18273	17	5	198.5
CG18273	20	5	119.833
CG18273	24	5	176.5
CG18273	27	5	42
CG18273	31	5	97.5
CG18273	34	5	84.5
CG18273	37	5	89.6667
CG18273	41	5	121.667
CG18273	46	5	134.667
CG17777	1	5	112
CG17777	5	5	108.5
CG17777	9	5	100.167
CG17777	12	5	127.833
CG17777	16	5	79.1667
CG17777	20	5	65.5
CG17777	25	5	87.5
CG17777	29	5	38
CG17777	32	5	50
CG17777	35	5	65.5
CG17777	39	5	145.5
CG17777	43	5	100.667
CG17777	48	5	82
Cyp4g1	1	5	1
Cyp4g1	6	5	3
Cyp4g1	10	5	10
Cyp4g1	13	5	0
Cyp4g1	17	5	0
Cyp4g1	22	5	11
Cyp4g1	26	5	8.66667
Cyp4g1	31	5	15.5
Cyp4g1	34	5	11.3333
Cyp4g1	37	5	15.3333
Cyp4g1	40	5	23.6667
Cyp4g1	43	5	43
Cyp4g1	47	5	23.5
CG13369	2	5	90.5
CG13369	6	5	114.667
CG13369	11	5	99.3333
CG13369	16	5	124.667
CG13369	19	5	135.667
CG13369	22	5	165.667
CG13369	25	5	143
CG13369	29	5	119.333
CG13369	33	5	106
CG13369	37	5	144.667
CG13369	40	5	120.667
CG13369	44	5	111.667
CG13369	48	5	108.167
KK Control	2	5	103.667
KK Control	6	5	98.5
KK Control	9	5	124
KK Control	13	5	133.833
KK Control	16	5	150.333
KK Control	19	5	112.833
KK Control	24	5	119.5
KK Control	26	5	206
KK Control	30	5	121.667
KK Control	34	5	89
KK Control	39	5	83.1667
KK Control	43	5	122.5
KK Control	48	5	118.5
babos	1	6	128.167
babos	5	6	220
babos	8	6	170.333
babos	11	6	81.8333
babos	14	6	102.667
babos	18	6	157.333
babos	23	6	174
babos	2	6	145.667
babos	30	6	112
babos	35	6	185
babos	38	6	146.5
babos	42	6	183.333
babos	47	6	136.167
boi	2	6	86.5
boi	6	6	30.6667
boi	11	6	78.8333
boi	14	6	152.167
boi	18	6	139.167
boi	23	6	95.3333
boi	25	6	104
boi	30	6	112.333
boi	34	6	159.667
boi	38	6	78
boi	41	6	92.5
boi	44	6	87.1667
boi	48	6	115.333
CG16868	3	6	143.833
CG16868	7	6	184.5
CG16868	10	6	77.3333
CG16868	13	6	141
CG16868	19	6	79.3333
CG16868	24	6	188.333
CG16868	25	6	52.3333
CG16868	29	6	135.667
CG16868	35	6	116.167
CG16868	39	6	107
CG16868	42	6	152.5
CG16868	44	6	115.333
CG16868	47	6	169.167
Lztr1	3	6	94.6667
Lztr1	8	6	136.667
Lztr1	10	6	118.5
Lztr1	13	6	163.667
Lztr1	18	6	134.667
Lztr1	22	6	145
Lztr1	25	6	86.6667
Lztr1	28	6	177.667
Lztr1	32	6	152.833
Lztr1	35	6	184.5
Lztr1	40	6	110.667
Lztr1	43	6	171.167
Lztr1	47	6	87.3333
crn	4	6	2.33333
crn	6	6	2.33333
crn	10	6	1.33333
crn	15	6	2
crn	19	6	0.666667
crn	22	6	3.83333
crn	25	6	0.666667
crn	28	6	0.333333
crn	32	6	0.5
crn	36	6	1
crn	40	6	0
crn	41	6	2
crn	46	6	2
egh	1	6	109.667
egh	5	6	125
egh	11	6	92.3333
egh	16	6	159.167
egh	18	6	143.167
egh	21	6	118
egh	25	6	124.667
egh	29	6	114.667
egh	32	6	117
egh	36	6	92.1667
egh	39	6	81
egh	42	6	144
egh	46	6	140.667
Pgant1	3	6	98.5
Pgant1	8	6	124.667
Pgant1	10	6	104.667
Pgant1	14	6	110.167
Pgant1	18	6	127.667
Pgant1	23	6	82.8333
Pgant1	27	6	162.167
Pgant1	30	6	152.333
Pgant1	34	6	164
Pgant1	37	6	117.167
Pgant1	40	6	134.667
Pgant1	44	6	110.167
Pgant1	48	6	135.667
Hsp22	2	6	134.333
Hsp22	6	6	107.167
Hsp22	10	6	132.833
Hsp22	14	6	162
Hsp22	19	6	93.3333
Hsp22	23	6	140.333
Hsp22	26	6	141.667
Hsp22	29	6	129
Hsp22	33	6	134.5
Hsp22	36	6	124.167
Hsp22	40	6	102.667
Hsp22	44	6	107
Hsp22	47	6	118.833
GD Control	1	6	154
GD Control	4	6	59.6667
GD Control	9	6	103.667
GD Control	14	6	106.333
GD Control	18	6	132.333
GD Control	21	6	101.833
GD Control	25	6	99.3333
GD Control	28	6	140.667
GD Control	32	6	128.833
GD Control	35	6	124.667
GD Control	39	6	129.833
GD Control	44	6	190.333
GD Control	48	6	224.333

## Sheet: Table S7
Gene	Replicate	Week	Block	Productivity
CycE	1	1	1	23.6667
CycE	5	1	1	15.3333
CycE	8	1	1	22.3333
CycE	11	1	1	16.6667
CycE	15	1	1	22.3333
CycE	19	1	1	22
CycE	22	1	1	23.3333
CycE	26	1	1	9.66667
CycE	29	1	1	20.6667
CycE	33	1	1	9.33333
CycE	37	1	1	29.3333
CycE	41	1	1	16.6667
CycE	46	1	1	13.6667
CG3704	2	1	1	28.6667
CG3704	5	1	1	27.3333
CG3704	8	1	1	36
CG3704	13	1	1	23.3333
CG3704	17	1	1	36
CG3704	21	1	1	37.3333
CG3704	26	1	1	35
CG3704	30	1	1	26.3333
CG3704	34	1	1	29.6667
CG3704	38	1	1	30
CG3704	41	1	1	20
CG3704	44	1	1	24.6667
CG3704	48	1	1	28.3333
Eip75B	3	1	1	23
Eip75B	7	1	1	20
Eip75B	11	1	1	39.3333
Eip75B	16	1	1	28
Eip75B	20	1	1	28
Eip75B	24	1	1	26
Eip75B	27	1	1	36
Eip75B	31	1	1	38.6667
Eip75B	34	1	1	21
Eip75B	38	1	1	34.3333
Eip75B	41	1	1	20.6667
Eip75B	44	1	1	39
Eip75B	48	1	1	21.3333
MED22	4	1	1	33
MED22	8	1	1	28
MED22	11	1	1	10.6667
MED22	16	1	1	39.3333
MED22	20	1	1	24
MED22	23	1	1	22.3333
MED22	27	1	1	34
MED22	31	1	1	26
MED22	35	1	1	20.3333
MED22	39	1	1	17.6667
MED22	43	1	1	23
MED22	46	1	1	23.3333
MED22	48	1	1	16
Nmd3	1	1	1	13
Nmd3	4	1	1	10.6667
Nmd3	8	1	1	23.6667
Nmd3	12	1	1	18
Nmd3	17	1	1	12.6667
Nmd3	21	1	1	17
Nmd3	25	1	1	16
Nmd3	28	1	1	21.3333
Nmd3	31	1	1	24
Nmd3	35	1	1	12
Nmd3	39	1	1	20
Nmd3	42	1	1	19.3333
Nmd3	46	1	1	12
piwi	2	1	1	19
piwi	5	1	1	19.6667
piwi	9	1	1	23.3333
piwi	13	1	1	17.6667
piwi	17	1	1	19.6667
piwi	21	1	1	17
piwi	24	1	1	22
piwi	29	1	1	21.6667
piwi	33	1	1	22.6667
piwi	38	1	1	14
piwi	41	1	1	15.6667
piwi	44	1	1	28.6667
piwi	47	1	1	26.3333
sgg	1	1	1	21
sgg	5	1	1	15.6667
sgg	9	1	1	20.6667
sgg	12	1	1	16
sgg	16	1	1	19
sgg	20	1	1	13.3333
sgg	23	1	1	16.3333
sgg	27	1	1	15.6667
sgg	31	1	1	14
sgg	36	1	1	18
sgg	40	1	1	23
sgg	43	1	1	16
sgg	47	1	1	29.3333
capu	2	1	1	17.6667
capu	6	1	1	16.3333
capu	10	1	1	24.6667
capu	13	1	1	31
capu	18	1	1	24.3333
capu	21	1	1	16.6667
capu	25	1	1	20.6667
capu	30	1	1	14.6667
capu	33	1	1	10
capu	36	1	1	7.33333
capu	39	1	1	16.6667
capu	43	1	1	13.6667
capu	48	1	1	15.3333
CG14436	3	1	1	31.6667
CG14436	7	1	1	21
CG14436	11	1	1	22.6667
CG14436	15	1	1	25.6667
CG14436	20	1	1	23
CG14436	23	1	1	23.3333
CG14436	28	1	1	36
CG14436	32	1	1	26.3333
CG14436	36	1	1	30
CG14436	39	1	1	19.6667
CG14436	42	1	1	21.6667
CG14436	45	1	1	19.3333
CG14436	48	1	1	20
CG3071	3	1	1	16
CG3071	7	1	1	9.66667
CG3071	11	1	1	14.3333
CG3071	14	1	1	22
CG3071	17	1	1	16.6667
CG3071	21	1	1	21.6667
CG3071	25	1	1	18
CG3071	28	1	1	16.3333
CG3071	31	1	1	8.66667
CG3071	36	1	1	22.6667
CG3071	39	1	1	12.6667
CG3071	42	1	1	28.3333
CG3071	46	1	1	21
dnc	1	1	1	18.3333
dnc	4	1	1	16.3333
dnc	8	1	1	12.3333
dnc	13	1	1	15
dnc	17	1	1	19.3333
dnc	22	1	1	20.3333
dnc	25	1	1	16.3333
dnc	29	1	1	17
dnc	33	1	1	18
dnc	36	1	1	16.3333
dnc	40	1	1	11
dnc	42	1	1	21
dnc	46	1	1	22
msn	4	1	1	17.3333
msn	7	1	1	21
msn	11	1	1	17.3333
msn	15	1	1	24.6667
msn	18	1	1	25.3333
msn	22	1	1	23
msn	25	1	1	26.6667
msn	29	1	1	16.3333
msn	32	1	1	19
msn	36	1	1	26
msn	39	1	1	17
msn	42	1	1	23
msn	45	1	1	22
sra	1	1	1	12
sra	5	1	1	22.3333
sra	8	1	1	21.6667
sra	11	1	1	17
sra	15	1	1	14
sra	20	1	1	16.3333
sra	23	1	1	16.3333
sra	26	1	1	17.6667
sra	30	1	1	17
sra	35	1	1	27
sra	38	1	1	17.3333
sra	41	1	1	19
sra	44	1	1	16.6667
KK control	2	1	1	10
KK control	6	1	1	16.3333
KK control	10	1	1	8.33333
KK control	13	1	1	21.3333
KK control	17	1	1	14.6667
KK control	20	1	1	15.6667
KK control	22	1	1	22.6667
KK control	27	1	1	26.3333
KK control	30	1	1	13.3333
KK control	34	1	1	16
KK control	37	1	1	22
KK control	41	1	1	12.6667
KK control	46	1	1	18.3333
CycE	1	2	1	31.3333
CycE	5	2	1	32
CycE	8	2	1	46.3333
CycE	11	2	1	43.3333
CycE	15	2	1	45.3333
CycE	19	2	1	45.3333
CycE	22	2	1	46.6667
CycE	26	2	1	36.3333
CycE	29	2	1	46.6667
CycE	33	2	1	36.6667
CycE	37	2	1	45.3333
CycE	41	2	1	27.3333
CycE	46	2	1	38.3333
CG3704	2	2	1	33.6667
CG3704	5	2	1	51.3333
CG3704	8	2	1	35
CG3704	13	2	1	51
CG3704	17	2	1	45.3333
CG3704	21	2	1	45.6667
CG3704	26	2	1	48
CG3704	30	2	1	58.3333
CG3704	34	2	1	42
CG3704	38	2	1	54
CG3704	41	2	1	41.6667
CG3704	44	2	1	54.6667
CG3704	48	2	1	53
Eip75B	3	2	1	47.6667
Eip75B	7	2	1	54
Eip75B	11	2	1	54
Eip75B	16	2	1	18
Eip75B	20	2	1	45.6667
Eip75B	24	2	1	52.6667
Eip75B	27	2	1	21.3333
Eip75B	31	2	1	45
Eip75B	34	2	1	52
Eip75B	38	2	1	51
Eip75B	41	2	1	50.6667
Eip75B	44	2	1	57.6667
Eip75B	48	2	1	51.6667
MED22	4	2	1	34.6667
MED22	8	2	1	51
MED22	11	2	1	31.6667
MED22	16	2	1	49.3333
MED22	20	2	1	35.6667
MED22	23	2	1	25
MED22	27	2	1	34.3333
MED22	31	2	1	46
MED22	35	2	1	42
MED22	39	2	1	52
MED22	43	2	1	44
MED22	46	2	1	46
MED22	48	2	1	39.6667
Nmd3	1	2	1	19
Nmd3	4	2	1	13.6667
Nmd3	8	2	1	48.3333
Nmd3	12	2	1	39.3333
Nmd3	17	2	1	44.3333
Nmd3	21	2	1	35.3333
Nmd3	25	2	1	35.3333
Nmd3	28	2	1	45
Nmd3	31	2	1	44
Nmd3	35	2	1	12
Nmd3	39	2	1	43
Nmd3	42	2	1	61
Nmd3	46	2	1	22.3333
piwi	2	2	1	57.6667
piwi	5	2	1	56.3333
piwi	9	2	1	50
piwi	13	2	1	48.6667
piwi	17	2	1	47.3333
piwi	21	2	1	50.3333
piwi	24	2	1	50.3333
piwi	29	2	1	55
piwi	33	2	1	48.6667
piwi	38	2	1	54
piwi	41	2	1	38.6667
piwi	44	2	1	51.6667
piwi	47	2	1	28.6667
sgg	1	2	1	42.6667
sgg	5	2	1	38.6667
sgg	9	2	1	45
sgg	12	2	1	42.3333
sgg	16	2	1	42
sgg	20	2	1	44.6667
sgg	23	2	1	38.6667
sgg	27	2	1	38
sgg	31	2	1	39.6667
sgg	36	2	1	38.6667
sgg	40	2	1	50.5
sgg	43	2	1	36.3333
sgg	47	2	1	45
capu	2	2	1	55.6667
capu	6	2	1	55.3333
capu	10	2	1	58
capu	13	2	1	59
capu	18	2	1	45.6667
capu	21	2	1	52.6667
capu	25	2	1	55.6667
capu	30	2	1	47.6667
capu	33	2	1	58.3333
capu	36	2	1	30
capu	39	2	1	61.6667
capu	43	2	1	29
capu	48	2	1	49.6667
CG14436	3	2	1	27.3333
CG14436	7	2	1	42.3333
CG14436	11	2	1	43.6667
CG14436	15	2	1	48
CG14436	20	2	1	48
CG14436	23	2	1	49.6667
CG14436	28	2	1	48
CG14436	32	2	1	49.6667
CG14436	36	2	1	50.6667
CG14436	39	2	1	50
CG14436	42	2	1	57
CG14436	45	2	1	52.3333
CG14436	48	2	1	48.6667
CG3071	3	2	1	35.6667
CG3071	7	2	1	9.33333
CG3071	11	2	1	51
CG3071	14	2	1	43.6667
CG3071	17	2	1	40
CG3071	21	2	1	51.6667
CG3071	25	2	1	48.6667
CG3071	28	2	1	39
CG3071	31	2	1	47.6667
CG3071	36	2	1	48
CG3071	39	2	1	52.3333
CG3071	42	2	1	55.6667
CG3071	46	2	1	43.3333
dnc	1	2	1	54
dnc	4	2	1	51.6667
dnc	8	2	1	65
dnc	13	2	1	48.6667
dnc	17	2	1	52.6667
dnc	22	2	1	46
dnc	25	2	1	57.5
dnc	29	2	1	48
dnc	33	2	1	34.6667
dnc	36	2	1	47.3333
dnc	40	2	1	26.5
dnc	42	2	1	31.3333
dnc	46	2	1	44.6667
msn	4	2	1	44.3333
msn	7	2	1	52.6667
msn	11	2	1	35
msn	15	2	1	28.3333
msn	18	2	1	32.3333
msn	22	2	1	38.3333
msn	25	2	1	43.6667
msn	29	2	1	45.3333
msn	32	2	1	43
msn	36	2	1	38.5
msn	39	2	1	52.6667
msn	42	2	1	50.3333
msn	45	2	1	42.3333
sra	1	2	1	44.3333
sra	5	2	1	51.3333
sra	8	2	1	53.6667
sra	11	2	1	49
sra	15	2	1	58
sra	20	2	1	50.3333
sra	23	2	1	43
sra	26	2	1	44
sra	30	2	1	61.3333
sra	35	2	1	38
sra	38	2	1	56.6667
sra	41	2	1	51.3333
sra	44	2	1	34.3333
KK control	2	2	1	35.5
KK control	6	2	1	48.6667
KK control	10	2	1	32.6667
KK control	13	2	1	45
KK control	17	2	1	28.3333
KK control	20	2	1	51
KK control	22	2	1	38.3333
KK control	27	2	1	56.5
KK control	30	2	1	46.6667
KK control	34	2	1	36.6667
KK control	37	2	1	40.3333
KK control	41	2	1	37.6667
KK control	46	2	1	37.3333
CycE	1	3	1	27.3333
CycE	5	3	1	23.3333
CycE	8	3	1	36.6667
CycE	11	3	1	44
CycE	15	3	1	31.3333
CycE	19	3	1	30
CycE	22	3	1	28.3333
CycE	26	3	1	34
CycE	29	3	1	39.6667
CycE	33	3	1	32.6667
CycE	37	3	1	35.3333
CycE	41	3	1	12.3333
CycE	46	3	1	30.3333
CG3704	2	3	1	42.6667
CG3704	5	3	1	28.6667
CG3704	8	3	1	29.3333
CG3704	13	3	1	32
CG3704	17	3	1	48.6667
CG3704	21	3	1	28
CG3704	26	3	1	39.6667
CG3704	30	3	1	42.3333
CG3704	34	3	1	39.6667
CG3704	38	3	1	48.5
CG3704	41	3	1	44.6667
CG3704	44	3	1	40.6667
CG3704	48	3	1	40.6667
Eip75B	3	3	1	39.5
Eip75B	7	3	1	51.3333
Eip75B	11	3	1	17.3333
Eip75B	16	3	1	17.6667
Eip75B	20	3	1	25.6667
Eip75B	24	3	1	33
Eip75B	27	3	1	39
Eip75B	31	3	1	40.6667
Eip75B	34	3	1	45.6667
Eip75B	38	3	1	31.6667
Eip75B	41	3	1	42.3333
Eip75B	44	3	1	47.3333
Eip75B	48	3	1	26.3333
MED22	4	3	1	32.3333
MED22	8	3	1	38.3333
MED22	11	3	1	21
MED22	16	3	1	30.5
MED22	20	3	1	28.3333
MED22	23	3	1	17
MED22	27	3	1	41
MED22	31	3	1	45
MED22	35	3	1	37
MED22	39	3	1	29.3333
MED22	43	3	1	44.3333
MED22	46	3	1	29
MED22	48	3	1	21.6667
Nmd3	1	3	1	34.3333
Nmd3	4	3	1	14
Nmd3	8	3	1	53.5
Nmd3	12	3	1	43.3333
Nmd3	17	3	1	42
Nmd3	21	3	1	49
Nmd3	25	3	1	35.6667
Nmd3	28	3	1	47
Nmd3	31	3	1	40
Nmd3	35	3	1	22
Nmd3	39	3	1	50
Nmd3	42	3	1	48
Nmd3	46	3	1	22
piwi	2	3	1	50.5
piwi	5	3	1	41
piwi	9	3	1	44.3333
piwi	13	3	1	46.6667
piwi	17	3	1	49.3333
piwi	21	3	1	52
piwi	24	3	1	52.5
piwi	29	3	1	49.6667
piwi	33	3	1	30.3333
piwi	38	3	1	31
piwi	41	3	1	24.5
piwi	44	3	1	35
piwi	47	3	1	20.6667
sgg	1	3	1	46
sgg	5	3	1	44
sgg	9	3	1	48.6667
sgg	12	3	1	40
sgg	16	3	1	34.3333
sgg	20	3	1	37.6667
sgg	23	3	1	37
sgg	27	3	1	40.6667
sgg	31	3	1	54
sgg	36	3	1	27.6667
sgg	40	3	1	50.5
sgg	43	3	1	31.3333
sgg	47	3	1	52
capu	2	3	1	44.6667
capu	6	3	1	41
capu	10	3	1	45
capu	13	3	1	66
capu	18	3	1	25
capu	21	3	1	31
capu	25	3	1	27
capu	30	3	1	18.5
capu	33	3	1	52.3333
capu	36	3	1	29
capu	39	3	1	48
capu	43	3	1	26.3333
capu	48	3	1	35
CG14436	3	3	1	19.3333
CG14436	7	3	1	42
CG14436	11	3	1	37
CG14436	15	3	1	39.3333
CG14436	20	3	1	43.3333
CG14436	23	3	1	50.6667
CG14436	28	3	1	41.6667
CG14436	32	3	1	46.3333
CG14436	36	3	1	55.6667
CG14436	39	3	1	46.6667
CG14436	42	3	1	41
CG14436	45	3	1	50
CG14436	48	3	1	42.3333
CG3071	3	3	1	37
CG3071	7	3	1	31.6667
CG3071	11	3	1	30
CG3071	14	3	1	38.6667
CG3071	17	3	1	44.6667
CG3071	21	3	1	40.6667
CG3071	25	3	1	36.3333
CG3071	28	3	1	40
CG3071	31	3	1	33.3333
CG3071	36	3	1	37.6667
CG3071	39	3	1	44
CG3071	42	3	1	46
CG3071	46	3	1	35.6667
dnc	1	3	1	45.3333
dnc	4	3	1	44.6667
dnc	8	3	1	0
dnc	13	3	1	44
dnc	17	3	1	47
dnc	22	3	1	43.3333
dnc	25	3	1	37.5
dnc	29	3	1	34.6667
dnc	33	3	1	40.3333
dnc	36	3	1	42
dnc	40	3	1	33
dnc	42	3	1	37
dnc	46	3	1	43.6667
msn	4	3	1	41
msn	7	3	1	48
msn	11	3	1	38
msn	15	3	1	30.5
msn	18	3	1	27.3333
msn	22	3	1	35.3333
msn	25	3	1	40
msn	29	3	1	32
msn	32	3	1	36
msn	36	3	1	40
msn	39	3	1	48.3333
msn	42	3	1	42
msn	45	3	1	42.3333
sra	1	3	1	46.3333
sra	5	3	1	46.3333
sra	8	3	1	46.6667
sra	11	3	1	52.5
sra	15	3	1	47.6667
sra	20	3	1	41.3333
sra	23	3	1	53
sra	26	3	1	41
sra	30	3	1	43.6667
sra	35	3	1	54
sra	38	3	1	36.3333
sra	41	3	1	41.5
sra	44	3	1	43.5
KK control	2	3	1	35.5
KK control	6	3	1	39.6667
KK control	10	3	1	41.6667
KK control	13	3	1	56
KK control	17	3	1	26.3333
KK control	20	3	1	28.6667
KK control	22	3	1	22.6667
KK control	27	3	1	29.5
KK control	30	3	1	31.6667
KK control	34	3	1	25
KK control	37	3	1	35.6667
KK control	41	3	1	24
KK control	46	3	1	31
CycE	1	4	1	27
CycE	5	4	1	0
CycE	8	4	1	30.6667
CycE	11	4	1	23
CycE	15	4	1	15
CycE	19	4	1	4
CycE	22	4	1	21
CycE	26	4	1	36.5
CycE	29	4	1	22.5
CycE	33	4	1	28.6667
CycE	37	4	1	29
CycE	41	4	1	3.5
CycE	46	4	1	7
CG3704	2	4	1	31.6667
CG3704	5	4	1	0
CG3704	8	4	1	22.6667
CG3704	13	4	1	33.3333
CG3704	17	4	1	30
CG3704	21	4	1	30
CG3704	26	4	1	43.6667
CG3704	30	4	1	51
CG3704	34	4	1	35.6667
CG3704	38	4	1	39.5
CG3704	41	4	1	34.5
CG3704	44	4	1	41
CG3704	48	4	1	40
Eip75B	3	4	1	0
Eip75B	7	4	1	12.6667
Eip75B	11	4	1	27.6667
Eip75B	16	4	1	0
Eip75B	20	4	1	12.6667
Eip75B	24	4	1	0
Eip75B	27	4	1	44.3333
Eip75B	31	4	1	37.3333
Eip75B	34	4	1	36
Eip75B	38	4	1	0
Eip75B	41	4	1	19.5
Eip75B	44	4	1	29.5
Eip75B	48	4	1	20.6667
MED22	4	4	1	37
MED22	8	4	1	47.6667
MED22	11	4	1	13.5
MED22	16	4	1	17
MED22	20	4	1	30
MED22	23	4	1	12.3333
MED22	27	4	1	3
MED22	31	4	1	43
MED22	35	4	1	30
MED22	39	4	1	35
MED22	43	4	1	24
MED22	46	4	1	35
MED22	48	4	1	21.5
Nmd3	1	4	1	40.6667
Nmd3	4	4	1	10.3333
Nmd3	8	4	1	30
Nmd3	12	4	1	27.5
Nmd3	17	4	1	28
Nmd3	21	4	1	29
Nmd3	25	4	1	17.6667
Nmd3	28	4	1	51.5
Nmd3	31	4	1	29
Nmd3	35	4	1	18.6667
Nmd3	39	4	1	64
Nmd3	42	4	1	8
Nmd3	46	4	1	20.6667
piwi	2	4	1	37
piwi	5	4	1	38
piwi	9	4	1	37
piwi	13	4	1	46
piwi	17	4	1	43
piwi	21	4	1	43.3333
piwi	24	4	1	38.5
piwi	29	4	1	40.6667
piwi	33	4	1	17
piwi	38	4	1	25.5
piwi	41	4	1	0
piwi	44	4	1	32
piwi	47	4	1	15
sgg	1	4	1	42
sgg	5	4	1	32
sgg	9	4	1	33.6667
sgg	12	4	1	28.5
sgg	16	4	1	14.3333
sgg	20	4	1	29.3333
sgg	23	4	1	32.6667
sgg	27	4	1	17
sgg	31	4	1	49.3333
sgg	36	4	1	16.6667
sgg	40	4	1	48
sgg	43	4	1	32.3333
sgg	47	4	1	48.6667
capu	2	4	1	64
capu	6	4	1	43
capu	10	4	1	37.6667
capu	13	4	1	49
capu	18	4	1	18.3333
capu	21	4	1	21
capu	25	4	1	53
capu	30	4	1	8
capu	33	4	1	45.6667
capu	36	4	1	4.33333
capu	39	4	1	27
capu	43	4	1	29
capu	48	4	1	15
CG14436	3	4	1	10.5
CG14436	7	4	1	47.3333
CG14436	11	4	1	27
CG14436	15	4	1	24.3333
CG14436	20	4	1	29
CG14436	23	4	1	33
CG14436	28	4	1	32.6667
CG14436	32	4	1	35.3333
CG14436	36	4	1	32.3333
CG14436	39	4	1	43.6667
CG14436	42	4	1	35.5
CG14436	45	4	1	47
CG14436	48	4	1	40
CG3071	3	4	1	30.5
CG3071	7	4	1	20
CG3071	11	4	1	23.3333
CG3071	14	4	1	30.3333
CG3071	17	4	1	43.6667
CG3071	21	4	1	44.6667
CG3071	25	4	1	31
CG3071	28	4	1	25.6667
CG3071	31	4	1	30
CG3071	36	4	1	33
CG3071	39	4	1	41
CG3071	42	4	1	50
CG3071	46	4	1	36
dnc	1	4	1	34.6667
dnc	4	4	1	34
dnc	8	4	1	0
dnc	13	4	1	34
dnc	17	4	1	42
dnc	22	4	1	37.3333
dnc	25	4	1	45
dnc	29	4	1	32.3333
dnc	33	4	1	33.3333
dnc	36	4	1	18
dnc	40	4	1	25
dnc	42	4	1	26
dnc	46	4	1	34.6667
msn	4	4	1	29.6667
msn	7	4	1	36
msn	11	4	1	39
msn	15	4	1	37
msn	18	4	1	25
msn	22	4	1	33
msn	25	4	1	26.3333
msn	29	4	1	29.3333
msn	32	4	1	0
msn	36	4	1	56
msn	39	4	1	37.6667
msn	42	4	1	18
msn	45	4	1	27.3333
sra	1	4	1	28.3333
sra	5	4	1	41.6667
sra	8	4	1	30.3333
sra	11	4	1	36
sra	15	4	1	50.6667
sra	20	4	1	41.6667
sra	23	4	1	25.5
sra	26	4	1	28.5
sra	30	4	1	38.3333
sra	35	4	1	0
sra	38	4	1	22
sra	41	4	1	21.5
sra	44	4	1	20.5
KK control	2	4	1	22
KK control	6	4	1	39
KK control	10	4	1	15.6667
KK control	13	4	1	35
KK control	17	4	1	26
KK control	20	4	1	30.5
KK control	22	4	1	24
KK control	27	4	1	20.5
KK control	30	4	1	41
KK control	34	4	1	24
KK control	37	4	1	15.6667
KK control	41	4	1	28.5
KK control	46	4	1	12.5
CycE	1	5	1	23
CycE	5	5	1	0
CycE	8	5	1	8
CycE	11	5	1	24
CycE	15	5	1	5
CycE	19	5	1	0
CycE	22	5	1	21.6667
CycE	26	5	1	3
CycE	29	5	1	6
CycE	33	5	1	15.6667
CycE	37	5	1	25.6667
CycE	41	5	1	5.5
CycE	46	5	1	35
CG3704	2	5	1	11.6667
CG3704	5	5	1	0
CG3704	8	5	1	18.5
CG3704	13	5	1	31
CG3704	17	5	1	13.3333
CG3704	21	5	1	19.5
CG3704	26	5	1	5.5
CG3704	30	5	1	22
CG3704	34	5	1	0
CG3704	38	5	1	31
CG3704	41	5	1	18
CG3704	44	5	1	35
CG3704	48	5	1	32
Eip75B	3	5	1	0
Eip75B	7	5	1	0
Eip75B	11	5	1	25.3333
Eip75B	16	5	1	0
Eip75B	20	5	1	9.33333
Eip75B	24	5	1	0
Eip75B	27	5	1	23.3333
Eip75B	31	5	1	10
Eip75B	34	5	1	25
Eip75B	38	5	1	0
Eip75B	41	5	1	9
Eip75B	44	5	1	21
Eip75B	48	5	1	24
MED22	4	5	1	35
MED22	8	5	1	29
MED22	11	5	1	15
MED22	16	5	1	1.5
MED22	20	5	1	19.5
MED22	23	5	1	0
MED22	27	5	1	0
MED22	31	5	1	23.5
MED22	35	5	1	14.5
MED22	39	5	1	0
MED22	43	5	1	3
MED22	46	5	1	22
MED22	48	5	1	9
Nmd3	1	5	1	31.6667
Nmd3	4	5	1	14.3333
Nmd3	8	5	1	26
Nmd3	12	5	1	27
Nmd3	17	5	1	25.6667
Nmd3	21	5	1	29.6667
Nmd3	25	5	1	8
Nmd3	28	5	1	31.5
Nmd3	31	5	1	10.3333
Nmd3	35	5	1	15.6667
Nmd3	39	5	1	44
Nmd3	42	5	1	0
Nmd3	46	5	1	9.33333
piwi	2	5	1	28.5
piwi	5	5	1	27.6667
piwi	9	5	1	0
piwi	13	5	1	35
piwi	17	5	1	24
piwi	21	5	1	39
piwi	24	5	1	28.5
piwi	29	5	1	19.3333
piwi	33	5	1	13
piwi	38	5	1	23
piwi	41	5	1	0
piwi	44	5	1	13
piwi	47	5	1	16.5
sgg	1	5	1	24
sgg	5	5	1	28
sgg	9	5	1	25
sgg	12	5	1	3
sgg	16	5	1	10
sgg	20	5	1	24
sgg	23	5	1	15.6667
sgg	27	5	1	12.5
sgg	31	5	1	45
sgg	36	5	1	6.33333
sgg	40	5	1	12.5
sgg	43	5	1	16.6667
sgg	47	5	1	35.3333
capu	2	5	1	31
capu	6	5	1	8
capu	10	5	1	25.3333
capu	13	5	1	9
capu	18	5	1	0.666667
capu	21	5	1	5
capu	25	5	1	26
capu	30	5	1	0
capu	33	5	1	36.3333
capu	36	5	1	0
capu	39	5	1	37.5
capu	43	5	1	12
capu	48	5	1	0
CG14436	3	5	1	7.5
CG14436	7	5	1	38.6667
CG14436	11	5	1	4.33333
CG14436	15	5	1	31.3333
CG14436	20	5	1	12
CG14436	23	5	1	14.5
CG14436	28	5	1	22.3333
CG14436	32	5	1	16
CG14436	36	5	1	7.66667
CG14436	39	5	1	42.3333
CG14436	42	5	1	46
CG14436	45	5	1	46.3333
CG14436	48	5	1	38
CG3071	3	5	1	23
CG3071	7	5	1	21.6667
CG3071	11	5	1	17.6667
CG3071	14	5	1	29.3333
CG3071	17	5	1	35.3333
CG3071	21	5	1	34.3333
CG3071	25	5	1	23.6667
CG3071	28	5	1	13.3333
CG3071	31	5	1	23.5
CG3071	36	5	1	30
CG3071	39	5	1	0
CG3071	42	5	1	32.3333
CG3071	46	5	1	38.3333
dnc	1	5	1	21.6667
dnc	4	5	1	10.3333
dnc	8	5	1	0
dnc	13	5	1	22.6667
dnc	17	5	1	22.5
dnc	22	5	1	36.6667
dnc	25	5	1	35
dnc	29	5	1	23.6667
dnc	33	5	1	20.5
dnc	36	5	1	7.5
dnc	40	5	1	0
dnc	42	5	1	24.5
dnc	46	5	1	4.66667
msn	4	5	1	27
msn	7	5	1	25
msn	11	5	1	31
msn	15	5	1	0
msn	18	5	1	10.5
msn	22	5	1	0
msn	25	5	1	13.5
msn	29	5	1	9.66667
msn	32	5	1	0
msn	36	5	1	45
msn	39	5	1	38
msn	42	5	1	0
msn	45	5	1	24
sra	1	5	1	17.3333
sra	5	5	1	4.5
sra	8	5	1	27.3333
sra	11	5	1	23
sra	15	5	1	29.6667
sra	20	5	1	29
sra	23	5	1	11.5
sra	26	5	1	18.5
sra	30	5	1	34.3333
sra	35	5	1	0
sra	38	5	1	12
sra	41	5	1	37
sra	44	5	1	14
KK control	2	5	1	23.5
KK control	6	5	1	36
KK control	10	5	1	23
KK control	13	5	1	52
KK control	17	5	1	11.5
KK control	20	5	1	33
KK control	22	5	1	30
KK control	27	5	1	13
KK control	30	5	1	26
KK control	34	5	1	32
KK control	37	5	1	7
KK control	41	5	1	15.5
KK control	46	5	1	1
CycE	1	6	1	0
CycE	5	6	1	0
CycE	8	6	1	0
CycE	11	6	1	16.6667
CycE	15	6	1	0
CycE	19	6	1	0
CycE	22	6	1	15
CycE	26	6	1	0
CycE	29	6	1	0
CycE	33	6	1	0
CycE	37	6	1	13.3333
CycE	41	6	1	0
CycE	46	6	1	0
CG3704	2	6	1	0
CG3704	5	6	1	0
CG3704	8	6	1	1
CG3704	13	6	1	4.5
CG3704	17	6	1	0
CG3704	21	6	1	0
CG3704	26	6	1	0
CG3704	30	6	1	36
CG3704	34	6	1	0
CG3704	38	6	1	32
CG3704	41	6	1	25
CG3704	44	6	1	31
CG3704	48	6	1	15.3333
Eip75B	3	6	1	0
Eip75B	7	6	1	0
Eip75B	11	6	1	2
Eip75B	16	6	1	0
Eip75B	20	6	1	5
Eip75B	24	6	1	0
Eip75B	27	6	1	19.6667
Eip75B	31	6	1	0.5
Eip75B	34	6	1	1
Eip75B	38	6	1	0
Eip75B	41	6	1	7.5
Eip75B	44	6	1	10.5
Eip75B	48	6	1	7.33333
MED22	4	6	1	5.5
MED22	8	6	1	14
MED22	11	6	1	0.5
MED22	16	6	1	0
MED22	20	6	1	10
MED22	23	6	1	0
MED22	27	6	1	0
MED22	31	6	1	10
MED22	35	6	1	0
MED22	39	6	1	0
MED22	43	6	1	0
MED22	46	6	1	0
MED22	48	6	1	0
Nmd3	1	6	1	0.5
Nmd3	4	6	1	1
Nmd3	8	6	1	0
Nmd3	12	6	1	11.5
Nmd3	17	6	1	5.5
Nmd3	21	6	1	19.6667
Nmd3	25	6	1	1
Nmd3	28	6	1	1
Nmd3	31	6	1	0
Nmd3	35	6	1	9.33333
Nmd3	39	6	1	26
Nmd3	42	6	1	0
Nmd3	46	6	1	0
piwi	2	6	1	9
piwi	5	6	1	2
piwi	9	6	1	0
piwi	13	6	1	24.3333
piwi	17	6	1	5.5
piwi	21	6	1	19
piwi	24	6	1	14.5
piwi	29	6	1	0
piwi	33	6	1	35
piwi	38	6	1	0
piwi	41	6	1	0
piwi	44	6	1	0
piwi	47	6	1	0
sgg	1	6	1	2.33333
sgg	5	6	1	8
sgg	9	6	1	13.6667
sgg	12	6	1	0
sgg	16	6	1	0.5
sgg	20	6	1	15.3333
sgg	23	6	1	4
sgg	27	6	1	0
sgg	31	6	1	0.5
sgg	36	6	1	0
sgg	40	6	1	0
sgg	43	6	1	6.66667
sgg	47	6	1	29.6667
capu	2	6	1	0
capu	6	6	1	0
capu	10	6	1	22.3333
capu	13	6	1	14
capu	18	6	1	1.5
capu	21	6	1	0
capu	25	6	1	0
capu	30	6	1	0
capu	33	6	1	15
capu	36	6	1	0
capu	39	6	1	0
capu	43	6	1	0
capu	48	6	1	0
CG14436	3	6	1	0
CG14436	7	6	1	16
CG14436	11	6	1	0
CG14436	15	6	1	3
CG14436	20	6	1	0
CG14436	23	6	1	2
CG14436	28	6	1	10
CG14436	32	6	1	0
CG14436	36	6	1	0
CG14436	39	6	1	0.333333
CG14436	42	6	1	0
CG14436	45	6	1	22.6667
CG14436	48	6	1	0.333333
CG3071	3	6	1	18.5
CG3071	7	6	1	4.5
CG3071	11	6	1	12.3333
CG3071	14	6	1	22.6667
CG3071	17	6	1	33.6667
CG3071	21	6	1	32.3333
CG3071	25	6	1	11
CG3071	28	6	1	10
CG3071	31	6	1	10
CG3071	36	6	1	13.5
CG3071	39	6	1	0
CG3071	42	6	1	0
CG3071	46	6	1	16.6667
dnc	1	6	1	15
dnc	4	6	1	7
dnc	8	6	1	0
dnc	13	6	1	13.5
dnc	17	6	1	25
dnc	22	6	1	34
dnc	25	6	1	9
dnc	29	6	1	0.333333
dnc	33	6	1	14
dnc	36	6	1	4.5
dnc	40	6	1	0
dnc	42	6	1	2
dnc	46	6	1	5.66667
msn	4	6	1	11.5
msn	7	6	1	16
msn	11	6	1	9
msn	15	6	1	0
msn	18	6	1	0
msn	22	6	1	0
msn	25	6	1	0
msn	29	6	1	0
msn	32	6	1	0
msn	36	6	1	17
msn	39	6	1	23
msn	42	6	1	0
msn	45	6	1	14.3333
sra	1	6	1	14.3333
sra	5	6	1	0
sra	8	6	1	15.3333
sra	11	6	1	11
sra	15	6	1	12.3333
sra	20	6	1	14.3333
sra	23	6	1	0
sra	26	6	1	6
sra	30	6	1	21.6667
sra	35	6	1	0
sra	38	6	1	1
sra	41	6	1	0
sra	44	6	1	1
KK control	2	6	1	7.5
KK control	6	6	1	22.3333
KK control	10	6	1	25
KK control	13	6	1	0
KK control	17	6	1	11.5
KK control	20	6	1	38
KK control	22	6	1	8.5
KK control	27	6	1	0.5
KK control	30	6	1	24.6667
KK control	34	6	1	10
KK control	37	6	1	17
KK control	41	6	1	14.5
KK control	46	6	1	0
CycE	1	7	1	0
CycE	5	7	1	0
CycE	8	7	1	0
CycE	11	7	1	5.33333
CycE	15	7	1	0
CycE	19	7	1	0
CycE	22	7	1	0
CycE	26	7	1	0
CycE	29	7	1	0
CycE	33	7	1	0
CycE	37	7	1	4
CycE	41	7	1	0
CycE	46	7	1	0
CG3704	2	7	1	0
CG3704	5	7	1	0
CG3704	8	7	1	0
CG3704	13	7	1	0
CG3704	17	7	1	0
CG3704	21	7	1	0
CG3704	26	7	1	0
CG3704	30	7	1	0.5
CG3704	34	7	1	0
CG3704	38	7	1	0
CG3704	41	7	1	0
CG3704	44	7	1	26
CG3704	48	7	1	5.33333
Eip75B	3	7	1	0
Eip75B	7	7	1	0
Eip75B	11	7	1	0
Eip75B	16	7	1	0
Eip75B	20	7	1	6.5
Eip75B	24	7	1	0
Eip75B	27	7	1	8.5
Eip75B	31	7	1	0
Eip75B	34	7	1	0
Eip75B	38	7	1	0
Eip75B	41	7	1	0
Eip75B	44	7	1	0
Eip75B	48	7	1	8
MED22	4	7	1	0
MED22	8	7	1	23.5
MED22	11	7	1	11
MED22	16	7	1	0
MED22	20	7	1	0
MED22	23	7	1	0
MED22	27	7	1	0
MED22	31	7	1	0
MED22	35	7	1	0
MED22	39	7	1	0
MED22	43	7	1	0
MED22	46	7	1	0
MED22	48	7	1	0
Nmd3	1	7	1	0
Nmd3	4	7	1	0
Nmd3	8	7	1	0
Nmd3	12	7	1	0.5
Nmd3	17	7	1	0.5
Nmd3	21	7	1	11.3333
Nmd3	25	7	1	0
Nmd3	28	7	1	0
Nmd3	31	7	1	0
Nmd3	35	7	1	0
Nmd3	39	7	1	0
Nmd3	42	7	1	0
Nmd3	46	7	1	7.33333
piwi	2	7	1	0
piwi	5	7	1	0
piwi	9	7	1	0
piwi	13	7	1	0
piwi	17	7	1	0
piwi	21	7	1	0
piwi	24	7	1	8.5
piwi	29	7	1	0
piwi	33	7	1	20
piwi	38	7	1	0
piwi	41	7	1	0
piwi	44	7	1	0
piwi	47	7	1	0
sgg	1	7	1	12.6667
sgg	5	7	1	0.333333
sgg	9	7	1	6.66667
sgg	12	7	1	0
sgg	16	7	1	0
sgg	20	7	1	9.33333
sgg	23	7	1	0
sgg	27	7	1	1
sgg	31	7	1	0
sgg	36	7	1	0
sgg	40	7	1	0
sgg	43	7	1	0
sgg	47	7	1	13.6667
capu	2	7	1	0
capu	6	7	1	0
capu	10	7	1	0
capu	13	7	1	6.5
capu	18	7	1	0
capu	21	7	1	0
capu	25	7	1	0
capu	30	7	1	0
capu	33	7	1	0
capu	36	7	1	0
capu	39	7	1	1
capu	43	7	1	0
capu	48	7	1	0
CG14436	3	7	1	0
CG14436	7	7	1	0
CG14436	11	7	1	0
CG14436	15	7	1	0
CG14436	20	7	1	0
CG14436	23	7	1	0
CG14436	28	7	1	0
CG14436	32	7	1	0
CG14436	36	7	1	0
CG14436	39	7	1	0
CG14436	42	7	1	0
CG14436	45	7	1	0
CG14436	48	7	1	0
CG3071	3	7	1	13.5
CG3071	7	7	1	0
CG3071	11	7	1	0
CG3071	14	7	1	0
CG3071	17	7	1	9.66667
CG3071	21	7	1	22.3333
CG3071	25	7	1	0
CG3071	28	7	1	0
CG3071	31	7	1	0
CG3071	36	7	1	0
CG3071	39	7	1	0
CG3071	42	7	1	0
CG3071	46	7	1	0
dnc	1	7	1	7.33333
dnc	4	7	1	0
dnc	8	7	1	0
dnc	13	7	1	13.5
dnc	17	7	1	35
dnc	22	7	1	20.3333
dnc	25	7	1	1
dnc	29	7	1	0
dnc	33	7	1	14
dnc	36	7	1	0
dnc	40	7	1	0
dnc	42	7	1	0
dnc	46	7	1	1.33333
msn	4	7	1	0
msn	7	7	1	1
msn	11	7	1	0
msn	15	7	1	0
msn	18	7	1	0
msn	22	7	1	0
msn	25	7	1	0
msn	29	7	1	0
msn	32	7	1	0
msn	36	7	1	17
msn	39	7	1	0
msn	42	7	1	0
msn	45	7	1	3.5
sra	1	7	1	0
sra	5	7	1	0
sra	8	7	1	8.66667
sra	11	7	1	0
sra	15	7	1	1.33333
sra	20	7	1	0
sra	23	7	1	0
sra	26	7	1	0
sra	30	7	1	3.33333
sra	35	7	1	0
sra	38	7	1	1
sra	41	7	1	0
sra	44	7	1	0
KK control	2	7	1	0
KK control	6	7	1	18.6667
KK control	10	7	1	21
KK control	13	7	1	0
KK control	17	7	1	9
KK control	20	7	1	18
KK control	22	7	1	0.5
KK control	27	7	1	0
KK control	30	7	1	5.66667
KK control	34	7	1	0
KK control	37	7	1	0
KK control	41	7	1	3.5
KK control	46	7	1	0
CycE	1	8	1	0
CycE	5	8	1	0
CycE	8	8	1	0
CycE	11	8	1	0
CycE	15	8	1	0
CycE	19	8	1	0
CycE	22	8	1	0
CycE	26	8	1	0
CycE	29	8	1	0
CycE	33	8	1	0
CycE	37	8	1	0
CycE	41	8	1	0
CycE	46	8	1	0
CG3704	2	8	1	0
CG3704	5	8	1	0
CG3704	8	8	1	0
CG3704	13	8	1	0
CG3704	17	8	1	0
CG3704	21	8	1	0
CG3704	26	8	1	0
CG3704	30	8	1	0
CG3704	34	8	1	0
CG3704	38	8	1	0
CG3704	41	8	1	0
CG3704	44	8	1	0
CG3704	48	8	1	0
Eip75B	3	8	1	0
Eip75B	7	8	1	0
Eip75B	11	8	1	0
Eip75B	16	8	1	0
Eip75B	20	8	1	0
Eip75B	24	8	1	0
Eip75B	27	8	1	0
Eip75B	31	8	1	0
Eip75B	34	8	1	0
Eip75B	38	8	1	0
Eip75B	41	8	1	0
Eip75B	44	8	1	0
Eip75B	48	8	1	0
MED22	4	8	1	0
MED22	8	8	1	0.5
MED22	11	8	1	0
MED22	16	8	1	0
MED22	20	8	1	0
MED22	23	8	1	0
MED22	27	8	1	0
MED22	31	8	1	0
MED22	35	8	1	0
MED22	39	8	1	0
MED22	43	8	1	0
MED22	46	8	1	0
MED22	48	8	1	0
Nmd3	1	8	1	0
Nmd3	4	8	1	0
Nmd3	8	8	1	0
Nmd3	12	8	1	0
Nmd3	17	8	1	0
Nmd3	21	8	1	0.5
Nmd3	25	8	1	0
Nmd3	28	8	1	0
Nmd3	31	8	1	0
Nmd3	35	8	1	0
Nmd3	39	8	1	0
Nmd3	42	8	1	0
Nmd3	46	8	1	0
piwi	2	8	1	0
piwi	5	8	1	0
piwi	9	8	1	0
piwi	13	8	1	0
piwi	17	8	1	0
piwi	21	8	1	0
piwi	24	8	1	0
piwi	29	8	1	0
piwi	33	8	1	0
piwi	38	8	1	0
piwi	41	8	1	0
piwi	44	8	1	0
piwi	47	8	1	0
sgg	1	8	1	3.33333
sgg	5	8	1	0
sgg	9	8	1	0.333333
sgg	12	8	1	0
sgg	16	8	1	0
sgg	20	8	1	0.5
sgg	23	8	1	0
sgg	27	8	1	0
sgg	31	8	1	0
sgg	36	8	1	0
sgg	40	8	1	0
sgg	43	8	1	0
sgg	47	8	1	1.33333
capu	2	8	1	0
capu	6	8	1	0
capu	10	8	1	0
capu	13	8	1	0
capu	18	8	1	0
capu	21	8	1	0
capu	25	8	1	0
capu	30	8	1	0
capu	33	8	1	0
capu	36	8	1	0
capu	39	8	1	0
capu	43	8	1	0
capu	48	8	1	0
CG14436	3	8	1	0
CG14436	7	8	1	0
CG14436	11	8	1	0
CG14436	15	8	1	0
CG14436	20	8	1	0
CG14436	23	8	1	0
CG14436	28	8	1	0
CG14436	32	8	1	0
CG14436	36	8	1	0
CG14436	39	8	1	0
CG14436	42	8	1	0
CG14436	45	8	1	0
CG14436	48	8	1	0
CG3071	3	8	1	0
CG3071	7	8	1	0
CG3071	11	8	1	0
CG3071	14	8	1	0
CG3071	17	8	1	6.33333
CG3071	21	8	1	0
CG3071	25	8	1	0
CG3071	28	8	1	0
CG3071	31	8	1	0
CG3071	36	8	1	0
CG3071	39	8	1	0
CG3071	42	8	1	0
CG3071	46	8	1	0
dnc	1	8	1	0
dnc	4	8	1	0
dnc	8	8	1	0
dnc	13	8	1	26
dnc	17	8	1	0
dnc	22	8	1	0
dnc	25	8	1	0
dnc	29	8	1	0
dnc	33	8	1	3.5
dnc	36	8	1	0
dnc	40	8	1	0
dnc	42	8	1	0
dnc	46	8	1	0
msn	4	8	1	0
msn	7	8	1	0
msn	11	8	1	0
msn	15	8	1	0
msn	18	8	1	0
msn	22	8	1	0
msn	25	8	1	0
msn	29	8	1	0
msn	32	8	1	0
msn	36	8	1	3
msn	39	8	1	0
msn	42	8	1	0
msn	45	8	1	1
sra	1	8	1	0
sra	5	8	1	0
sra	8	8	1	0
sra	11	8	1	0
sra	15	8	1	0
sra	20	8	1	0
sra	23	8	1	0
sra	26	8	1	0
sra	30	8	1	0
sra	35	8	1	0
sra	38	8	1	0
sra	41	8	1	0
sra	44	8	1	0
KK control	2	8	1	0
KK control	6	8	1	0.333333
KK control	10	8	1	0
KK control	13	8	1	0
KK control	17	8	1	0
KK control	20	8	1	0
KK control	22	8	1	0
KK control	27	8	1	0
KK control	30	8	1	0
KK control	34	8	1	0
KK control	37	8	1	0
KK control	41	8	1	0
KK control	46	8	1	0
CycE	1	9	1	0
CycE	5	9	1	0
CycE	8	9	1	0
CycE	11	9	1	0
CycE	15	9	1	0
CycE	19	9	1	0
CycE	22	9	1	0
CycE	26	9	1	0
CycE	29	9	1	0
CycE	33	9	1	0
CycE	37	9	1	0
CycE	41	9	1	0
CycE	46	9	1	0
CG3704	2	9	1	0
CG3704	5	9	1	0
CG3704	8	9	1	0
CG3704	13	9	1	0
CG3704	17	9	1	0
CG3704	21	9	1	0
CG3704	26	9	1	0
CG3704	30	9	1	0
CG3704	34	9	1	0
CG3704	38	9	1	0
CG3704	41	9	1	0
CG3704	44	9	1	0
CG3704	48	9	1	0
Eip75B	3	9	1	0
Eip75B	7	9	1	0
Eip75B	11	9	1	0
Eip75B	16	9	1	0
Eip75B	20	9	1	0
Eip75B	24	9	1	0
Eip75B	27	9	1	0
Eip75B	31	9	1	0
Eip75B	34	9	1	0
Eip75B	38	9	1	0
Eip75B	41	9	1	0
Eip75B	44	9	1	0
Eip75B	48	9	1	0.5
MED22	4	9	1	0
MED22	8	9	1	0
MED22	11	9	1	0
MED22	16	9	1	0
MED22	20	9	1	0
MED22	23	9	1	0
MED22	27	9	1	0
MED22	31	9	1	0
MED22	35	9	1	0
MED22	39	9	1	0
MED22	43	9	1	0
MED22	46	9	1	0
MED22	48	9	1	0
Nmd3	1	9	1	0
Nmd3	4	9	1	0
Nmd3	8	9	1	0
Nmd3	12	9	1	0
Nmd3	17	9	1	0
Nmd3	21	9	1	0
Nmd3	25	9	1	0
Nmd3	28	9	1	0
Nmd3	31	9	1	0
Nmd3	35	9	1	0
Nmd3	39	9	1	0
Nmd3	42	9	1	0
Nmd3	46	9	1	0
piwi	2	9	1	0
piwi	5	9	1	0
piwi	9	9	1	0
piwi	13	9	1	0
piwi	17	9	1	0
piwi	21	9	1	0
piwi	24	9	1	0
piwi	29	9	1	0
piwi	33	9	1	0
piwi	38	9	1	0
piwi	41	9	1	0
piwi	44	9	1	0
piwi	47	9	1	0
sgg	1	9	1	0
sgg	5	9	1	0
sgg	9	9	1	0
sgg	12	9	1	0
sgg	16	9	1	0
sgg	20	9	1	0
sgg	23	9	1	0
sgg	27	9	1	0
sgg	31	9	1	0
sgg	36	9	1	0
sgg	40	9	1	0
sgg	43	9	1	0
sgg	47	9	1	0
capu	2	9	1	0
capu	6	9	1	0
capu	10	9	1	0
capu	13	9	1	0
capu	18	9	1	0
capu	21	9	1	0
capu	25	9	1	0
capu	30	9	1	0
capu	33	9	1	0
capu	36	9	1	0
capu	39	9	1	0
capu	43	9	1	0
capu	48	9	1	0
CG14436	3	9	1	0
CG14436	7	9	1	0
CG14436	11	9	1	0
CG14436	15	9	1	0
CG14436	20	9	1	0
CG14436	23	9	1	0
CG14436	28	9	1	0
CG14436	32	9	1	0
CG14436	36	9	1	0
CG14436	39	9	1	0
CG14436	42	9	1	0
CG14436	45	9	1	0
CG14436	48	9	1	0
CG3071	3	9	1	0
CG3071	7	9	1	0
CG3071	11	9	1	0
CG3071	14	9	1	0
CG3071	17	9	1	0
CG3071	21	9	1	0
CG3071	25	9	1	0
CG3071	28	9	1	0
CG3071	31	9	1	0
CG3071	36	9	1	0
CG3071	39	9	1	0
CG3071	42	9	1	0
CG3071	46	9	1	0
dnc	1	9	1	0
dnc	4	9	1	0
dnc	8	9	1	0
dnc	13	9	1	0
dnc	17	9	1	0
dnc	22	9	1	0
dnc	25	9	1	0
dnc	29	9	1	0
dnc	33	9	1	0
dnc	36	9	1	0
dnc	40	9	1	0
dnc	42	9	1	0
dnc	46	9	1	0
msn	4	9	1	0
msn	7	9	1	0
msn	11	9	1	0
msn	15	9	1	0
msn	18	9	1	0
msn	22	9	1	0
msn	25	9	1	0
msn	29	9	1	0
msn	32	9	1	0
msn	36	9	1	0
msn	39	9	1	0
msn	42	9	1	0
msn	45	9	1	0
sra	1	9	1	0
sra	5	9	1	0
sra	8	9	1	0
sra	11	9	1	0
sra	15	9	1	0
sra	20	9	1	0
sra	23	9	1	0
sra	26	9	1	0
sra	30	9	1	0
sra	35	9	1	0
sra	38	9	1	0
sra	41	9	1	0
sra	44	9	1	0
KK control	2	9	1	0
KK control	6	9	1	0
KK control	10	9	1	0
KK control	13	9	1	0
KK control	17	9	1	0
KK control	20	9	1	0
KK control	22	9	1	0
KK control	27	9	1	0
KK control	30	9	1	0
KK control	34	9	1	0
KK control	37	9	1	0
KK control	41	9	1	0
KK control	46	9	1	0
CycE	1	10	1	0
CycE	5	10	1	0
CycE	8	10	1	0
CycE	11	10	1	0
CycE	15	10	1	0
CycE	19	10	1	0
CycE	22	10	1	0
CycE	26	10	1	0
CycE	29	10	1	0
CycE	33	10	1	0
CycE	37	10	1	0
CycE	41	10	1	0
CycE	46	10	1	0
CG3704	2	10	1	0
CG3704	5	10	1	0
CG3704	8	10	1	0
CG3704	13	10	1	0
CG3704	17	10	1	0
CG3704	21	10	1	0
CG3704	26	10	1	0
CG3704	30	10	1	0
CG3704	34	10	1	0
CG3704	38	10	1	0
CG3704	41	10	1	0
CG3704	44	10	1	0
CG3704	48	10	1	0
Eip75B	3	10	1	0
Eip75B	7	10	1	0
Eip75B	11	10	1	0
Eip75B	16	10	1	0
Eip75B	20	10	1	0
Eip75B	24	10	1	0
Eip75B	27	10	1	0
Eip75B	31	10	1	0
Eip75B	34	10	1	0
Eip75B	38	10	1	0
Eip75B	41	10	1	0
Eip75B	44	10	1	0
Eip75B	48	10	1	0
MED22	4	10	1	0
MED22	8	10	1	0
MED22	11	10	1	0
MED22	16	10	1	0
MED22	20	10	1	0
MED22	23	10	1	0
MED22	27	10	1	0
MED22	31	10	1	0
MED22	35	10	1	0
MED22	39	10	1	0
MED22	43	10	1	0
MED22	46	10	1	0
MED22	48	10	1	0
Nmd3	1	10	1	0
Nmd3	4	10	1	0
Nmd3	8	10	1	0
Nmd3	12	10	1	0
Nmd3	17	10	1	0
Nmd3	21	10	1	0
Nmd3	25	10	1	0
Nmd3	28	10	1	0
Nmd3	31	10	1	0
Nmd3	35	10	1	0
Nmd3	39	10	1	0
Nmd3	42	10	1	0
Nmd3	46	10	1	0
piwi	2	10	1	0
piwi	5	10	1	0
piwi	9	10	1	0
piwi	13	10	1	0
piwi	17	10	1	0
piwi	21	10	1	0
piwi	24	10	1	0
piwi	29	10	1	0
piwi	33	10	1	0
piwi	38	10	1	0
piwi	41	10	1	0
piwi	44	10	1	0
piwi	47	10	1	0
sgg	1	10	1	0
sgg	5	10	1	0
sgg	9	10	1	0
sgg	12	10	1	0
sgg	16	10	1	0
sgg	20	10	1	0
sgg	23	10	1	0
sgg	27	10	1	0
sgg	31	10	1	0
sgg	36	10	1	0
sgg	40	10	1	0
sgg	43	10	1	0
sgg	47	10	1	0
capu	2	10	1	0
capu	6	10	1	0
capu	10	10	1	0
capu	13	10	1	0
capu	18	10	1	0
capu	21	10	1	0
capu	25	10	1	0
capu	30	10	1	0
capu	33	10	1	0
capu	36	10	1	0
capu	39	10	1	0
capu	43	10	1	0
capu	48	10	1	0
CG14436	3	10	1	0
CG14436	7	10	1	0
CG14436	11	10	1	0
CG14436	15	10	1	0
CG14436	20	10	1	0
CG14436	23	10	1	0
CG14436	28	10	1	0
CG14436	32	10	1	0
CG14436	36	10	1	0
CG14436	39	10	1	0
CG14436	42	10	1	0
CG14436	45	10	1	0
CG14436	48	10	1	0
CG3071	3	10	1	0
CG3071	7	10	1	0
CG3071	11	10	1	0
CG3071	14	10	1	0
CG3071	17	10	1	0
CG3071	21	10	1	0
CG3071	25	10	1	0
CG3071	28	10	1	0
CG3071	31	10	1	0
CG3071	36	10	1	0
CG3071	39	10	1	0
CG3071	42	10	1	0
CG3071	46	10	1	0
dnc	1	10	1	0
dnc	4	10	1	0
dnc	8	10	1	0
dnc	13	10	1	0
dnc	17	10	1	0
dnc	22	10	1	0
dnc	25	10	1	0
dnc	29	10	1	0
dnc	33	10	1	0
dnc	36	10	1	0
dnc	40	10	1	0
dnc	42	10	1	0
dnc	46	10	1	0
msn	4	10	1	0
msn	7	10	1	0
msn	11	10	1	0
msn	15	10	1	0
msn	18	10	1	0
msn	22	10	1	0
msn	25	10	1	0
msn	29	10	1	0
msn	32	10	1	0
msn	36	10	1	0
msn	39	10	1	0
msn	42	10	1	0
msn	45	10	1	0
sra	1	10	1	0
sra	5	10	1	0
sra	8	10	1	0
sra	11	10	1	0
sra	15	10	1	0
sra	20	10	1	0
sra	23	10	1	0
sra	26	10	1	0
sra	30	10	1	0
sra	35	10	1	0
sra	38	10	1	0
sra	41	10	1	0
sra	44	10	1	0
KK control	2	10	1	0
KK control	6	10	1	0
KK control	10	10	1	0
KK control	13	10	1	0
KK control	17	10	1	0
KK control	20	10	1	0
KK control	22	10	1	0
KK control	27	10	1	0
KK control	30	10	1	0
KK control	34	10	1	0
KK control	37	10	1	0
KK control	41	10	1	0
KK control	46	10	1	0
abo	3	1	2	28
abo	8	1	2	28.3333
abo	12	1	2	38
abo	15	1	2	37.3333
abo	18	1	2	27
abo	23	1	2	39
abo	25	1	2	28.6667
abo	28	1	2	56
abo	32	1	2	34.3333
abo	36	1	2	38.3333
abo	39	1	2	50
abo	42	1	2	28.3333
abo	46	1	2	29
CG3326	2	1	2	42
CG3326	7	1	2	48.3333
CG3326	11	1	2	33.6667
CG3326	16	1	2	38.3333
CG3326	17	1	2	42
CG3326	21	1	2	43
CG3326	24	1	2	41.6667
CG3326	27	1	2	33
CG3326	30	1	2	0
CG3326	33	1	2	41
CG3326	39	1	2	41.6667
CG3326	43	1	2	24.3333
CG3326	47	1	2	32.3333
CG4452	4	1	2	36
CG4452	8	1	2	19
CG4452	9	1	2	15.6667
CG4452	13	1	2	24
CG4452	18	1	2	19.6667
CG4452	24	1	2	33.6667
CG4452	27	1	2	37.6667
CG4452	30	1	2	43.6667
CG4452	34	1	2	34.3333
CG4452	37	1	2	35.6667
CG4452	40	1	2	18
CG4452	44	1	2	26.6667
CG4452	48	1	2	35.3333
Dredd	2	1	2	35
Dredd	7	1	2	20.6667
Dredd	11	1	2	32.6667
Dredd	16	1	2	21.6667
Dredd	21	1	2	31
Dredd	24	1	2	24
Dredd	27	1	2	14.3333
Dredd	30	1	2	21
Dredd	33	1	2	19
Dredd	37	1	2	16.3333
Dredd	40	1	2	17.6667
Dredd	43	1	2	28
Dredd	47	1	2	13.6667
wds	1	1	2	30.3333
wds	5	1	2	23
wds	9	1	2	24.3333
wds	13	1	2	27.3333
wds	16	1	2	8
wds	19	1	2	25
wds	22	1	2	23
wds	25	1	2	24.3333
wds	30	1	2	10.6667
wds	33	1	2	24
wds	36	1	2	22
wds	40	1	2	28.6667
wds	45	1	2	30.3333
KK control	3	1	2	30
KK control	8	1	2	24.6667
KK control	12	1	2	39
KK control	16	1	2	45.3333
KK control	19	1	2	42
KK control	22	1	2	26.6667
KK control	26	1	2	28.6667
KK control	29	1	2	18.6667
KK control	33	1	2	39
KK control	36	1	2	18
KK control	40	1	2	17
KK control	43	1	2	15
KK control	47	1	2	34
abo	3	2	2	35.3333
abo	8	2	2	5
abo	12	2	2	45.3333
abo	15	2	2	39.6667
abo	18	2	2	36.6667
abo	23	2	2	43.6667
abo	25	2	2	33.3333
abo	28	2	2	43.6667
abo	32	2	2	36.3333
abo	36	2	2	32.3333
abo	39	2	2	31.3333
abo	42	2	2	37.3333
abo	46	2	2	30.3333
CG3326	2	2	2	25
CG3326	7	2	2	49
CG3326	11	2	2	36.6667
CG3326	16	2	2	30.3333
CG3326	17	2	2	41.3333
CG3326	21	2	2	31
CG3326	24	2	2	50
CG3326	27	2	2	34
CG3326	30	2	2	0
CG3326	33	2	2	35.6667
CG3326	39	2	2	32
CG3326	43	2	2	40.6667
CG3326	47	2	2	28
CG4452	4	2	2	12.3333
CG4452	8	2	2	6
CG4452	9	2	2	10.3333
CG4452	13	2	2	29
CG4452	18	2	2	7.33333
CG4452	24	2	2	24.3333
CG4452	27	2	2	47
CG4452	30	2	2	40
CG4452	34	2	2	32.6667
CG4452	37	2	2	38
CG4452	40	2	2	8
CG4452	44	2	2	36.3333
CG4452	48	2	2	45.3333
Dredd	2	2	2	42
Dredd	7	2	2	27
Dredd	11	2	2	43
Dredd	16	2	2	35.3333
Dredd	21	2	2	37
Dredd	24	2	2	35.6667
Dredd	27	2	2	16
Dredd	30	2	2	39.6667
Dredd	33	2	2	48.6667
Dredd	37	2	2	23.3333
Dredd	40	2	2	34
Dredd	43	2	2	15.3333
Dredd	47	2	2	21
wds	1	2	2	38.3333
wds	5	2	2	29.3333
wds	9	2	2	37.6667
wds	13	2	2	43.3333
wds	16	2	2	21
wds	19	2	2	31
wds	22	2	2	30.3333
wds	25	2	2	37.3333
wds	30	2	2	31
wds	33	2	2	37.3333
wds	36	2	2	31.3333
wds	40	2	2	24.3333
wds	45	2	2	18
KK control	3	2	2	47.3333
KK control	8	2	2	38
KK control	12	2	2	35.6667
KK control	16	2	2	50
KK control	19	2	2	36.3333
KK control	22	2	2	48.6667
KK control	26	2	2	31.6667
KK control	29	2	2	42.6667
KK control	33	2	2	38.6667
KK control	36	2	2	43.6667
KK control	40	2	2	55.6667
KK control	43	2	2	53.3333
KK control	47	2	2	47.3333
abo	3	3	2	28.6667
abo	8	3	2	4.33333
abo	12	3	2	36.3333
abo	15	3	2	25.3333
abo	18	3	2	31.3333
abo	23	3	2	16
abo	25	3	2	22.3333
abo	28	3	2	35.3333
abo	32	3	2	29.6667
abo	36	3	2	33.3333
abo	39	3	2	35.6667
abo	42	3	2	27.3333
abo	46	3	2	31
CG3326	2	3	2	31.6667
CG3326	7	3	2	21
CG3326	11	3	2	18.3333
CG3326	16	3	2	34.3333
CG3326	17	3	2	29.6667
CG3326	21	3	2	30
CG3326	24	3	2	37.6667
CG3326	27	3	2	25.3333
CG3326	30	3	2	0
CG3326	33	3	2	33
[truncated: 5,541 more rows]

## Sheet: Table S8
A. Full Model ANOVAs								B1. ANOVA Models by Sex - Female								B2. ANOVA Models by Sex - Male								C1. Effect and p-Value Summaries - Female							C2. Effect and p-Value Summaries - Male
Gene	Source	DF	SS	MS	F Ratio	Prob > F		Gene	Source	DF	SS	MS	F Ratio	Prob > F		Gene	Source	DF	SS	MS	F Ratio	Prob > F		Gene	Difference	SE Difference	Lower CL	Upper CL	p-Value		Gene	Difference	SE Difference	Lower CL	Upper CL	p-Value
abo	Genotype	1	5601.4	5601.4	26.0021	<.0001		abo	Genotype	1	1372.4	1372.4	8.7884	0.0035		abo	Genotype	1	4722.8	4722.8	17.1485	<.0001		abo	4.66312	1.57297	1.55751	7.76873	0.0035		abo	8.69149	2.09885	4.54724	12.8357	<.0001
	Sex	1	31396.2	31396.2	145.743	<.0001			Rep[Genotype]	92	43182.5	469.375	3.0057	<.0001			Rep[Genotype]	92	50117.6	544.757	1.978	<.0001		babos	1.62168	2.13188	-2.58583	5.82918	0.4479		babos	-1.54205	2.42312	-6.32989	3.2458	0.5255
	Genotype*Sex	1	509.675	509.67	2.3659	0.125			Error	166	25922.5	156.16					Error	164	45166.5	275.405				blw	-27.6424	1.99263	-31.5733	-23.7114	<.0001		blw	-52.8125	1.66811	-56.1042	-49.5208	<.0001
	Rep[Genotype]	92	23398.8	254.33	1.1806	0.1489		babos	Genotype	1	173.141	173.141	0.5786	0.4479		babos	Genotype	1	135.563	135.563	0.405	0.5255		boi	1.92965	2.66304	-3.32596	7.18526	0.4697		boi	-17.9685	2.01039	-21.9374	-13.9997	<.0001
	Rep*Sex[Genotype]	92	69441.8	754.8	3.5038	<.0001			Rep[Genotype]	92	61840.3	672.177	2.2464	<.0001			Rep[Genotype]	87	49647	570.655	1.7048	0.0021		capu	-8.74934	2.45097	-13.586	-3.91263	0.0005		capu	5.40426	2.30491	0.851162	9.95735	0.0203
	Error	330	71089	215.421					Error	175	52364	299.223					Error	150	50209.5	334.73				Cdc7	23.2837	2.84211	17.6756	28.8918	<.0001		Cdc7	-12.444	1.93636	-16.2659	-8.62208	<.0001
babos	Genotype	1	33.49	33.5	0.1066	0.7442		blw	Genotype	1	53618.9	53618.9	192.44	<.0001		blw	Genotype	1	188085	188085	1002.36	<.0001		CG12018	-0.078236	2.07764	-4.17775	4.02128	0.97		CG12018	-10.2498	2.06006	-14.3159	-6.18376	<.0001
	Sex	1	111432	111432	354.895	<.0001			Rep[Genotype]	94	23628.7	251.37	0.9022	0.7094			Rep[Genotype]	94	36159.9	384.7	2.0501	<.0001		CG13369	11.4457	2.28894	6.92762	15.9637	<.0001		CG13369	-5.53066	2.07328	-9.62317	-1.43814	0.0084
	Genotype*Sex	1	160.53	160.5	0.5113	0.4751			Error	187	52103.2	278.627					Error	179	33588	187.64				CG13760	-1.52837	1.94673	-5.37001	2.31327	0.4334		CG13760	6.36178	2.19464	2.0282	10.6954	0.0043
	Rep[Genotype]	86	28301.2	329.1	1.0481	0.3797		boi	Genotype	1	246.425	246.425	0.525	0.4697		boi	Genotype	1	20521.6	20521.6	79.8853	<.0001		CG13933	1.52367	1.76835	-1.96636	5.0137	0.3901		CG13933	3.41667	2.05045	-0.630952	7.46429	0.0975
	Rep*Sex[Genotype]	86	74075.6	861.3	2.7433	<.0001			Rep[Genotype]	92	71206.3	773.981	1.6491	0.0024			Rep[Genotype]	91	53970.8	593.09	2.3087	<.0001		CG14969	-2.09028	2.66528	-7.34835	3.16779	0.4339		CG14969	-9.86111	2.00096	-13.8112	-5.91101	<.0001
	Error	313	98277.7	313.99					Error	176	82603.2	469.336					Error	168	43157.2	256.888				CG16868	-3.45109	2.58987	-8.5617	1.65952	0.1844		CG16868	-9.64539	2.16805	-13.9246	-5.36616	<.0001
blw	Genotype	1	222593	222593	950.73	<.0001		capu	Genotype	1	5132.81	5132.81	12.743	0.0005		capu	Genotype	1	1751.57	1751.57	5.4975	0.0203		CG17777	-4.85296	2.02085	-8.84133	-0.864585	0.0174		CG17777	-1.43902	2.1626	-5.70975	2.8317	0.5067
	Sex	1	9828.84	9828.8	41.9805	<.0001			Rep[Genotype]	93	46917.6	504.49	1.2525	0.1013			Rep[Genotype]	92	37645.6	409.192	1.2843	0.0853		CG18273	0.528985	1.98075	-3.38025	4.43822	0.7897		CG18273	-9.67453	2.06978	-13.7616	-5.58749	<.0001
	Genotype*Sex	1	21786.1	21786.1	93.0516	<.0001			Error	178	71697.2	402.793					Error	155	49385	318.613				CG3071	6.625	2.18523	2.3122	10.9378	0.0028		CG3071	4.35823	2.21464	-0.014271	8.73073	0.0507
	Rep[Genotype]	94	11348.2	120.7	0.5156	0.9999		Cdc7	Genotype	1	36660.2	36660.2	67.1154	<.0001		Cdc7	Genotype	1	10126.9	10126.9	41.3	<.0001		CG32809	7.03982	1.95469	3.18319	10.8964	0.0004		CG32809	0.711956	2.04769	-3.33006	4.75397	0.7285
	Rep*Sex[Genotype]	94	49032.8	521.6	2.2279	<.0001			Rep[Genotype]	92	43725.4	475.28	0.8701	0.7705			Rep[Genotype]	93	44760.4	481.29	1.9628	<.0001		CG3326	-7.20213	1.75802	-10.6732	-3.73101	<.0001		CG3326	7.20725	2.41529	2.43635	11.9781	0.0033
	Error	366	85691.2	234.13					Error	180	98320.7	546.226					Error	173	42420.2	245.203				CG3704	0.465278	2.14111	-3.76011	4.69066	0.8282		CG3704	-27.7529	2.20368	-32.1034	-23.4024	<.0001
boi	Genotype	1	7942.74	7942.74	21.9666	<.0001		CG3071	Genotype	1	2903.08	2903.08	9.1913	0.0028		CG3071	Genotype	1	1200.45	1200.45	3.8727	0.0507		CG4281	7.96343	2.22761	3.56818	12.3587	0.0004		CG4281	10.3474	2.53842	5.33648	15.3583	<.0001
	Sex	1	61929.7	61929.7	171.274	<.0001			Rep[Genotype]	94	51604.2	548.98	1.7381	0.0009			Rep[Genotype]	93	44849.7	482.255	1.5558	0.0068		CG4452	-4.47643	1.39459	-7.22893	-1.72393	0.0016		CG4452	-9.5659	1.75154	-13.0241	-6.10773	<.0001
	Genotype*Sex	1	12649.6	12649.6	34.9839	<.0001			Error	175	55274	315.851					Error	166	51456.5	309.979				CG4554	5.98079	1.87223	2.28602	9.67557	0.0017		CG4554	8.35432	1.90417	4.59606	12.1126	<.0001
	Rep[Genotype]	90	28982.5	322.03	0.8906	0.742		CG3326	Genotype	1	3252.17	3252.17	16.7832	<.0001		CG3326	Genotype	1	3111.48	3111.48	8.9043	0.0033		CG5254	-9.07986	2.60711	-14.2241	-3.93563	0.0006		CG5254	0.928339	2.44946	-3.90674	5.76342	0.7052
	Rep*Sex[Genotype]	90	94688	1052.09	2.9097	<.0001			Rep[Genotype]	91	46827.9	514.592	2.6556	<.0001			Rep[Genotype]	90	54443	604.922	1.7311	0.0014		CG7970	2.55371	1.81308	-1.02419	6.13161	0.1607		CG7970	-3.13822	2.28336	-7.64619	1.36975	0.1712
	Error	339	122576	361.58					Error	165	31973	193.776					Error	156	54512	349.436				CG7971	8.64746	1.79292	5.10988	12.185	<.0001		CG7971	4.43478	1.9663	0.55226	8.3173	0.0254
capu	Genotype	1	492.459	492.46	1.351	0.2459		CG3704	Genotype	1	14.457	14.4573	0.0472	0.8282		CG3704	Genotype	1	49128.1	49128.1	158.606	<.0001		crn	-7.69354	2.39371	-12.4196	-2.9675	0.0016		crn	-59.7629	2.41201	-64.5366	-54.9892	<.0001
	Sex	1	56364.6	56364.6	154.625	<.0001			Rep[Genotype]	94	45021.5	478.952	1.5644	0.0055			Rep[Genotype]	93	38268.1	411.48	1.3284	0.0562		CycE	-12.2743	2.0928	-16.4039	-8.14474	<.0001		CycE	3.12906	2.34529	-1.50288	7.761	0.184
	Genotype*Sex	1	6873.91	6873.91	18.8573	<.0001			Error	177	54189.3	306.154					Error	168	52037.8	309.749				Cyp4g1	-13.846	1.92531	-17.6463	-10.0457	<.0001		Cyp4g1	-44.3901	1.65287	-47.6533	-41.1269	<.0001
	Rep[Genotype]	92	19550	212.5	0.583	0.9988		CG4281	Genotype	1	4334.4	4334.4	12.7798	0.0004		CG4281	Genotype	1	6890.77	6890.77	16.6162	<.0001		DAAM	9.75532	1.79994	6.20294	13.3077	<.0001		DAAM	12.0696	1.87932	8.3598	15.7794	<.0001
	Rep*Sex[Genotype]	92	63259.7	687.61	1.8863	<.0001			Rep[Genotype]	93	58274.1	626.603	1.8475	0.0002			Rep[Genotype]	92	69443	754.816	1.8201	0.0004		dnc	1.58045	2.37795	-3.1127	6.27361	0.5072		dnc	-2.0376	2.15599	-6.29568	2.22048	0.346
	Error	332	121022	364.523					Error	182	61727.3	339.161					Error	170	70499.3	414.702				Dredd	-14.8688	1.65267	-18.1315	-11.6061	<.0001		Dredd	10.4057	2.55231	5.36609	15.4453	<.0001
Cdc7	Genotype	1	4018.71	4018.71	10.0969	0.0016		CG4452	Genotype	1	1315.34	1315.34	10.3031	0.0016		CG4452	Genotype	1	5783.3	5783.3	29.8272	<.0001		dx	1.20649	1.95987	-2.66093	5.0739	0.5389		dx	-4.91652	2.08587	-9.03371	-0.799318	0.0195
	Sex	1	1294.05	1294.05	3.2513	0.0722			Rep[Genotype]	93	30363.3	326.487	2.5574	<.0001			Rep[Genotype]	93	36741	395.064	2.0375	<.0001		egh	5.99653	2.57194	0.920104	11.073	0.0209		egh	-15.8671	2.33533	-20.4791	-11.2551	<.0001
	Genotype*Sex	1	42961.3	42961.3	107.939	<.0001			Error	174	22213.5	127.664					Error	166	32186.3	193.894				Eip75B	-7.21742	2.28097	-11.7185	-2.71638	0.0018		Eip75B	0.521122	2.26856	-3.95971	5.00195	0.8186
	Rep[Genotype]	93	20444.1	219.83	0.5523	0.9996		CG4554	Genotype	1	2385.84	2385.84	10.2046	0.0017		CG4554	Genotype	1	4577.13	4577.13	19.249	<.0001		Fdx1	-5.28472	2.73866	-10.6881	0.118692	0.0552		Fdx1	-0.565972	2.17457	-4.85826	3.72632	0.795
	Rep*Sex[Genotype]	93	68328.8	734.72	1.846	<.0001			Rep[Genotype]	93	51788.4	556.865	2.3818	<.0001			Rep[Genotype]	92	70514.1	766.457	3.2233	<.0001		fs(1)N	1.84537	1.94077	-1.98392	5.67467	0.3429		fs(1)N	5.20221	1.99545	1.26364	9.14077	0.0099
	Error	355	141295	398.014					Error	177	41382.5	233.799					Error	174	41374.7	237.785				G9a	4.08843	2.05929	0.0252873	8.15157	0.0486		G9a	-3.33665	1.98186	-7.24872	0.575414	0.0941
CG3071	Genotype	1	3469.61	3469.62	11.0591	0.001		CG5254	Genotype	1	5614.31	5614.31	12.1294	0.0006		CG5254	Genotype	1	55.809	55.8091	0.1436	0.7052		Hsl	-0.049645	2.01695	-4.03001	3.93072	0.9804		Hsl	3.69807	2.23746	-0.719099	8.11523	0.1002
	Sex	1	21513.5	21513.5	68.5722	<.0001			Rep[Genotype]	94	46975.7	499.741	1.0797	0.3277			Rep[Genotype]	93	64355.8	691.998	1.781	0.0006		Hsp22	0.548611	2.31895	-4.02722	5.12444	0.8133		Hsp22	-3.00931	2.08952	-7.13337	1.11475	0.1516
	Genotype*Sex	1	88.932	88.93	0.2835	0.5948			Error	181	83778.8	462.866					Error	171	66440	388.538				Klp67A	5.59929	2.15537	1.34624	9.85234	0.0102		Klp67A	-3.47865	2.02366	-7.47372	0.516432	0.0875
	Rep[Genotype]	93	27247.1	292.98	0.9338	0.6476		CG7970	Genotype	1	437.086	437.086	1.9838	0.1607		CG7970	Genotype	1	623.503	623.503	1.8889	0.1712		l(1)G0004	-4.29942	2.85796	-9.93862	1.33977	0.1342		l(1)G0004	-2.06376	2.34815	-6.70006	2.57254	0.3807
	Rep*Sex[Genotype]	93	66780.4	718.07	2.2888	<.0001			Rep[Genotype]	93	62693.1	674.12	3.0597	<.0001			Rep[Genotype]	91	64928.3	713.498	2.1616	<.0001		lama	-5.53657	1.96125	-9.40746	-1.66567	0.0053		lama	9.09737	2.42293	4.31447	13.8803	0.0002
	Error	340	106670	313.735					Error	178	39217.3	220.322					Error	167	55123.5	330.081				Lztr1	6.62847	2.35479	1.9814	11.2756	0.0054		Lztr1	1.50609	2.24614	-2.929	5.94118	0.5035
CG3326	Genotype	1	0.102	0.1	0.0004	0.9843		CG7971	Genotype	1	5111	5111	23.2625	<.0001		CG7971	Genotype	1	1224	1224	5.0868	0.0254		MED22	-12.3211	2.29676	-16.8537	-7.78855	<.0001		MED22	5.4704	2.19099	1.14256	9.79824	0.0136
	Sex	1	53882.1	53882.1	205.966	<.0001			Rep[Genotype]	93	53590.5	576.242	2.6227	<.0001			Rep[Genotype]	90	83131.3	923.682	3.8387	<.0001		msn	-11.0153	2.38277	-15.717	-6.31355	<.0001		msn	-1.36525	2.76698	-6.83029	4.09979	0.6224
	Genotype*Sex	1	6379.15	6379.15	24.3846	<.0001			Error	182	39987.2	219.71					Error	164	39462	240.622				ND-ACP	0.939716	1.77072	-2.55472	4.43415	0.5963		ND-ACP	-43.5482	1.57143	-46.6507	-40.4458	<.0001
	Rep[Genotype]	90	22858.3	253.98	0.9709	0.5568		CG12018	Genotype	1	0.416	0.4163	0.0014	0.97		CG12018	Genotype	1	6857.27	6857.27	24.7557	<.0001		Nmd3	9.37832	2.35786	4.72464	14.032	0.0001		Nmd3	-4.79047	2.04218	-8.82319	-0.757756	0.0202
	Rep*Sex[Genotype]	90	75507.4	838.97	3.207	<.0001			Rep[Genotype]	93	46298.4	497.832	1.6957	0.0013			Rep[Genotype]	92	76112.4	827.308	2.9867	<.0001		pcx	6.10128	2.71405	0.745221	11.4573	0.0258		pcx	9.98548	2.38043	5.28414	14.6868	<.0001
	Error	319	83452.3	261.606					Error	181	53138.3	293.582					Error	173	47920.7	276.998				Pgant1	8.30777	2.83128	2.72058	13.895	0.0038		Pgant1	-20.1447	2.16305	-24.4155	-15.8739	<.0001
CG3704	Genotype	1	25299.5	25299.5	81.9751	<.0001		CG13369	Genotype	1	8513.99	8513.99	25.0042	<.0001		CG13369	Genotype	1	1980.42	1980.42	7.116	0.0084		piwi	-3.58922	2.43501	-8.39578	1.21734	0.1423		piwi	-2.22163	2.27037	-6.70582	2.26256	0.3293
	Sex	1	0.389	0.39	0.0013	0.9717			Rep[Genotype]	92	50776	551.913	1.6209	0.0034			Rep[Genotype]	93	43248.9	465.042	1.671	0.0019		pn	-7.19902	2.79827	-12.7207	-1.67739	0.0109		pn	4.52408	2.46056	-0.334371	9.38254	0.0678
	Genotype*Sex	1	24794.1	24794.1	80.3376	<.0001			Error	172	58566.5	340.503					Error	171	47590	278.304				RpL22	-16.7698	1.55089	-19.8309	-13.7087	<.0001		RpL22	-49.7391	1.48682	-52.6748	-46.8035	<.0001
	Rep[Genotype]	93	28530.5	306.78	0.994	0.5018		CG13760	Genotype	1	156.364	156.364	0.6164	0.4334		CG13760	Genotype	1	2514.25	2514.25	8.403	0.0043		sgg	10.0592	2.24495	5.62904	14.4893	<.0001		sgg	1.67021	2.0528	-2.38275	5.72318	0.417
	Rep*Sex[Genotype]	93	52284.8	562.2	1.8216	<.0001			Rep[Genotype]	92	46007.8	500.085	1.9713	<.0001			Rep[Genotype]	91	78858.8	866.58	2.8962	<.0001		sov	-0.491395	2.26893	-4.96975	3.98696	0.8288		sov	-1.76149	2.35387	-6.41153	2.88856	0.4554
	Error	344	106167	308.624					Error	178	45155.8	253.684					Error	163	48771.3	299.211				sra	-6.62545	2.41271	-11.3882	-1.86273	0.0067		sra	-5.89756	2.50236	-10.842	-0.953132	0.0197
CG4281	Genotype	1	10736.2	10736.2	28.4632	<.0001		CG13933	Genotype	1	152.851	152.851	0.7424	0.3901		CG13933	Genotype	1	748.526	748.526	2.7766	0.0975		TRAM	2.92014	2.89294	-2.78809	8.62836	0.3141		TRAM	-7.43403	2.35595	-12.0851	-2.78294	0.0019
	Sex	1	110636	110636	293.313	<.0001			Rep[Genotype]	91	64807.6	712.171	3.4591	<.0001			Rep[Genotype]	90	74405.6	826.729	3.0666	<.0001		wds	8.22541	1.79305	4.6856	11.7652	<.0001		wds	5.22947	2.05095	1.17885	9.28009	0.0117
	Genotype*Sex	1	230.89	230.9	0.6121	0.4345			Error	175	36029.7	205.884					Error	170	45829.8	269.587				zf30c	8.24653	2.74929	2.82215	13.6709	0.0031		zf30c	0.031099	2.38295	-4.67456	4.73676	0.9896
	Rep[Genotype]	92	30335	329.7	0.8742	0.7787		CG14969	Genotype	1	305.054	305.054	0.6151	0.4339		CG14969	Genotype	1	6252.4	6252.4	24.287	<.0001
	Rep*Sex[Genotype]	92	95550.2	1038.6	2.7535	<.0001			Rep[Genotype]	94	39904.3	424.514	0.8559	0.7996			Rep[Genotype]	94	45392.9	482.903	1.8758	0.0002
	Error	350	132018	377.19					Error	186	92250.3	495.97					Error	169	43507	257.438
CG4452	Genotype	1	6349.19	6349.19	39.6826	<.0001		CG16868	Genotype	1	801.8	801.8	1.7756	0.1844		CG16868	Genotype	1	6074.22	6074.22	19.7926	<.0001
	Sex	1	16299.5	16299.5	101.872	<.0001			Rep[Genotype]	93	58246.9	626.311	1.387	0.0319			Rep[Genotype]	92	58322.3	633.938	2.0657	<.0001
	Genotype*Sex	1	834.035	834.04	5.2127	0.023			Error	179	80828.2	451.554					Error	173	53092.7	306.894
	Rep[Genotype]	93	17163.5	184.55	1.1535	0.1828		CG17777	Genotype	1	1552.51	1552.51	5.7669	0.0174		CG17777	Genotype	1	127.267	127.267	0.4428	0.5067
	Rep*Sex[Genotype]	93	49050.7	527.43	3.2964	<.0001			Rep[Genotype]	92	47255.1	513.642	1.908	0.0001			Rep[Genotype]	91	42156.4	463.257	1.6117	0.0043
	Error	340	54399.8	160					Error	175	47111.5	269.209					Error	161	46276.3	287.431
CG4554	Genotype	1	6511.6	6511.6	27.5298	<.0001		CG18273	Genotype	1	18.446	18.4463	0.0713	0.7897		CG18273	Genotype	1	5808.51	5808.51	21.848	<.0001
	Sex	1	110333	110333	466.469	<.0001			Rep[Genotype]	92	48412.6	526.224	2.0346	<.0001			Rep[Genotype]	91	42599.6	468.127	1.7608	0.0009
	Genotype*Sex	1	228.54	228.5	0.9662	0.3263			Error	175	45260.5	258.631					Error	163	43335.2	265.86
	Rep[Genotype]	92	25010.4	271.9	1.1493	0.1889		CG32809	Genotype	1	3404.12	3404.12	12.9708	0.0004		CG32809	Genotype	1	32.775	32.7749	0.1209	0.7285
	Rep*Sex[Genotype]	92	96092	1044.5	4.4159	<.0001			Rep[Genotype]	93	52747.6	567.179	2.1611	<.0001			Rep[Genotype]	92	61259.6	665.865	2.456	<.0001
	Error	349	82548.5	236.53					Error	183	48027.3	262.444					Error	171	46361.8	271.122
CG5254	Genotype	1	2122.84	2122.84	4.9481	0.0268		crn	Genotype	1	3723.16	3723.16	10.3302	0.0016		crn	Genotype	1	154761	154761	613.909	<.0001
	Sex	1	89081.7	89081.7	207.638	<.0001			Rep[Genotype]	92	52845.2	574.404	1.5937	0.0047			Rep[Genotype]	74	28009.4	378.5	1.5015	0.0228
	Genotype*Sex	1	3219.51	3219.51	7.5043	0.0065			Error	166	59828.8	360.415					Error	125	31511.5	252.09
	Rep[Genotype]	93	19213.8	206.6	0.4816	1		CycE	Genotype	1	10209.3	10209.3	34.3986	<.0001		CycE	Genotype	1	599.614	599.614	1.7801	0.184
	Rep*Sex[Genotype]	93	93226.5	1002.44	2.3366	<.0001			Rep[Genotype]	94	58342.7	620.67	2.0912	<.0001			Rep[Genotype]	93	50837.1	546.636	1.6228	0.0037
	Error	350	150158	429.02					Error	180	53423.2	296.795					Error	159	53559.2	336.85
CG7970	Genotype	1	60.67	60.67	0.2273	0.6338		Cyp4g1	Genotype	1	12459.5	12459.5	51.719	<.0001		Cyp4g1	Genotype	1	124960	124960	721.266	<.0001
	Sex	1	81748	81748	306.305	<.0001			Rep[Genotype]	92	47653.7	517.98	2.1501	<.0001			Rep[Genotype]	92	37703.8	409.8	2.3655	<.0001
	Genotype*Sex	1	774.32	774.32	2.9013	0.0894			Error	172	41436.2	240.908					Error	167	28933	173.25
	Rep[Genotype]	91	21945.7	241.16	0.9036	0.7151		DAAM	Genotype	1	6275.29	6275.29	29.3744	<.0001		DAAM	Genotype	1	9375.48	9375.48	41.2464	<.0001
	Rep*Sex[Genotype]	91	102357	1124.81	4.2146	<.0001			Rep[Genotype]	92	42768.1	464.871	2.176	<.0001			Rep[Genotype]	92	56214.1	611.023	2.6881	<.0001
	Error	341	91007.5	266.88					Error	175	37385.5	213.631					Error	170	38641.7	227.304
CG7971	Genotype	1	5200.01	5200.01	22.8947	<.0001		dnc	Genotype	1	164.978	164.978	0.4417	0.5072		dnc	Genotype	1	254.263	254.263	0.8932	0.346
	Sex	1	84781.7	84781.7	373.279	<.0001			Rep[Genotype]	93	65700.9	706.461	1.8916	0.0002			Rep[Genotype]	93	41674.2	448.109	1.5741	0.0061
	Genotype*Sex	1	479.16	479.16	2.1097	0.1473			Error	175	65359.3	373.482					Error	159	45262.2	284.668
	Rep[Genotype]	90	26618.4	295.76	1.3022	0.05		Dredd	Genotype	1	14087.5	14087.5	80.943	<.0001		Dredd	Genotype	1	6759.69	6759.69	16.6217	<.0001
	Rep*Sex[Genotype]	90	107026	1189.18	5.2357	<.0001			Rep[Genotype]	92	51467.8	559.43	3.2143	<.0001			Rep[Genotype]	91	61617.9	677.12	1.665	0.0024
	Error	340	77223.2	227.13					Error	168	29239.2	174.043					Error	164	66695.2	406.678
CG12018	Genotype	1	3714.76	3714.76	12.9657	0.0004		dx	Genotype	1	98.035	98.0346	0.379	0.5389		dx	Genotype	1	1570.31	1570.31	5.5557	0.0195
	Sex	1	68204.9	68204.9	238.057	<.0001			Rep[Genotype]	93	50133.8	539.073	2.0838	<.0001			Rep[Genotype]	92	83431	906.859	3.2084	<.0001
	Genotype*Sex	1	3251.7	3251.7	11.3495	0.0008			Error	179	46306.3	258.695					Error	172	48615.3	282.647
	Rep[Genotype]	92	25912.1	281.65	0.9831	0.5281		egh	Genotype	1	2355.87	2355.87	5.436	0.0209		egh	Genotype	1	15386	15386	46.1636	<.0001
	Rep*Sex[Genotype]	92	95397.2	1036.93	3.6192	<.0001			Rep[Genotype]	94	72002.8	765.987	1.7675	0.0006			Rep[Genotype]	91	51316.7	563.92	1.692	0.0019
	Error	352	100850	286.51					Error	173	74975.5	433.384					Error	160	53326.8	333.293
CG13369	Genotype	1	1033.36	1033.35	3.3484	0.0681		Eip75B	Genotype	1	3510.52	3510.52	10.0121	0.0018		Eip75B	Genotype	1	16.389	16.3895	0.0528	0.8186
	Sex	1	39103.2	39103.2	126.708	<.0001			Rep[Genotype]	93	51648.2	555.357	1.5839	0.0045			Rep[Genotype]	91	44644.5	490.599	1.5796	0.0061
	Genotype*Sex	1	9601.2	9601.2	31.1113	<.0001			Error	179	62762.2	350.627					Error	157	48762.3	310.588
	Rep[Genotype]	92	26783.1	291.12	0.9433	0.6243		Fdx1	Genotype	1	1920.8	1920.8	3.7236	0.0552		Fdx1	Genotype	1	20.888	20.8876	0.0677	0.795
	Rep*Sex[Genotype]	92	67553.2	734.27	2.3793	<.0001			Rep[Genotype]	94	46610.5	495.856	0.9613	0.5793			Rep[Genotype]	94	64927.9	690.722	2.24	<.0001
	Error	342	105544	308.608					Error	183	94398.7	515.84					Error	172	53036.5	308.352
CG13760	Genotype	1	669.42	669.4	2.4214	0.1206		fs(1)N	Genotype	1	232.755	232.755	0.9041	0.3429		fs(1)N	Genotype	1	1763.9	1763.9	6.7966	0.0099
	Sex	1	128978	128978	466.542	<.0001			Rep[Genotype]	93	53536.8	575.664	2.2361	<.0001			Rep[Genotype]	91	69758.5	766.577	2.9537	<.0001
	Genotype*Sex	1	2130	2130	7.7047	0.0058			Error	182	46854	257.44					Error	173	44898.2	259.527
	Rep[Genotype]	91	26256.8	288.5	1.0437	0.3863		G9a	Genotype	1	1142.46	1142.46	3.9417	0.0486		G9a	Genotype	1	719.875	719.875	2.8345	0.0941
	Rep*Sex[Genotype]	91	98455.8	1081.9	3.9136	<.0001			Rep[Genotype]	93	54837.5	589.651	2.0344	<.0001			Rep[Genotype]	92	64562.7	701.768	2.7632	<.0001
	Error	339	93718.5	276.46					Error	182	52751.3	289.842					Error	171	43428.8	253.97
CG13933	Genotype	1	706.82	706.8	2.9692	0.0858		Hsl	Genotype	1	0.164	0.1642	0.0006	0.9804		Hsl	Genotype	1	872.032	872.032	2.7317	0.1002
	Sex	1	106608	106608	447.839	<.0001			Rep[Genotype]	92	44216	480.608	1.7738	0.0006			Rep[Genotype]	92	66910	727.283	2.2783	<.0001
	Genotype*Sex	1	150.14	150.1	0.6307	0.4276			Error	177	47957.7	270.947					Error	168	53629.5	319.223
	Rep[Genotype]	90	25274.1	280.8	1.1797	0.1507		Hsp22	Genotype	1	20.395	20.3954	0.056	0.8133		Hsp22	Genotype	1	595.166	595.166	2.0742	0.1516
	Rep*Sex[Genotype]	90	113305	1258.9	5.2886	<.0001			Rep[Genotype]	94	65402.2	695.768	1.9093	0.0001			Rep[Genotype]	93	56777.3	610.508	2.1276	<.0001
	Error	343	81650.8	238.05					Error	180	65593.3	364.407					Error	174	49928.2	286.943
CG14969	Genotype	1	4781.02	4781.02	12.5022	0.0005		Klp67A	Genotype	1	2120.1	2120.1	6.7487	0.0102		Klp67A	Genotype	1	769.789	769.789	2.9549	0.0875
	Sex	1	39392.4	39392.4	103.01	<.0001			Rep[Genotype]	92	50745	551.576	1.7558	0.0007			Rep[Genotype]	91	78763.9	865.537	3.3225	<.0001
	Genotype*Sex	1	2021.24	2021.24	5.2855	0.0221			Error	180	56546.8	314.149					Error	168	43765.8	260.511
	Rep[Genotype]	94	22248.4	236.69	0.6189	0.997		l(1)G0004	Genotype	1	1243.92	1243.92	2.2631	0.1342		l(1)G0004	Genotype	1	265.661	265.661	0.7724	0.3807
	Rep*Sex[Genotype]	94	62980.1	670	1.752	0.0001			Rep[Genotype]	93	55987.4	602.015	1.0953	0.2997			Rep[Genotype]	90	70165.3	779.615	2.2668	<.0001
	Error	355	135757	382.415					Error	181	99485.7	549.645					Error	165	56747.3	343.923
CG16868	Genotype	1	5666.59	5666.6	15.0196	0.0001		lama	Genotype	1	2015.41	2015.41	7.9692	0.0053		lama	Genotype	1	5326.48	5326.48	14.0978	0.0002
	Sex	1	109978	109978	291.501	<.0001			Rep[Genotype]	93	48995.2	526.83	2.0832	<.0001			Rep[Genotype]	92	78405.3	852.231	2.2556	<.0001
	Genotype*Sex	1	1259.56	1259.6	3.3385	0.0685			Error	174	44004.3	252.898					Error	170	64230	377.824
	Rep[Genotype]	92	30993.5	336.9	0.8929	0.7398		Lztr1	Genotype	1	2934.2	2934.2	7.9236	0.0054		Lztr1	Genotype	1	141.343	141.344	0.4496	0.5035
	Rep*Sex[Genotype]	92	84273.9	916	2.428	<.0001			Rep[Genotype]	94	83365	886.861	2.3949	<.0001			Rep[Genotype]	91	44163.1	485.309	1.5437	0.0081
	Error	350	132048	377.28					Error	177	65545.2	370.312					Error	164	51557.7	314.376
CG17777	Genotype	1	1266.06	1266.06	4.5678	0.0333		MED22	Genotype	1	10121.1	10121	28.7785	<.0001		MED22	Genotype	1	1797.48	1797.48	6.2338	0.0136
	Sex	1	94753.2	94753.2	341.862	<.0001			Rep[Genotype]	92	53800	584.78	1.6628	0.002			Rep[Genotype]	91	51575.7	566.766	1.9656	0.0001
	Genotype*Sex	1	274.015	274.01	0.9886	0.3208			Error	177	62248.7	351.687					Error	156	44981.3	288.342
	Rep[Genotype]	90	23269.4	258.55	0.9328	0.6473		msn	Genotype	1	8218.9	8218.9	21.3712	<.0001		msn	Genotype	1	112.292	112.292	0.2435	0.6224
	Rep*Sex[Genotype]	90	65757.5	730.64	2.6361	<.0001			Rep[Genotype]	93	44569.8	479.245	1.2462	0.1059			Rep[Genotype]	92	51899.7	564.127	1.223	0.1338
	Error	331	91742.7	277.17					Error	180	69224	384.578					Error	158	72877.5	461.25
CG18273	Genotype	1	2757.56	2757.56	10.5139	0.0013		ND-ACP	Genotype	1	58.815	58.8149	0.2816	0.5963		ND-ACP	Genotype	1	119547	119547	767.98	<.0001
	Sex	1	54382.8	54382.8	207.349	<.0001			Rep[Genotype]	92	31972.4	347.526	1.6642	0.002			Rep[Genotype]	89	46321.2	520.5	3.3435	<.0001
	Genotype*Sex	1	3498.77	3498.77	13.34	0.0003			Error	177	36962.8	208.83					Error	167	25996	155.66
	Rep[Genotype]	90	27151.8	301.69	1.1503	0.1906		Nmd3	Genotype	1	5780.36	5780.36	15.8203	0.0001		Nmd3	Genotype	1	1418.69	1418.69	5.5026	0.0202
	Rep*Sex[Genotype]	90	62974.2	699.71	2.6678	<.0001			Rep[Genotype]	93	59238.7	636.975	1.7433	0.0008			Rep[Genotype]	91	37341.7	410.349	1.5916	0.0052
	Error	334	87600.5	262.277					Error	174	63575.5	365.376					Error	162	41767	257.821
CG32809	Genotype	1	1857.43	1857.43	6.9421	0.0088		pcx	Genotype	1	2480.36	2480.36	5.0537	0.0258		pcx	Genotype	1	6025.25	6025.25	17.5965	<.0001
	Sex	1	80248	80248	299.927	<.0001			Rep[Genotype]	93	48679.9	523.44	1.0665	0.3539			Rep[Genotype]	90	56250	625	1.8253	0.0005
	Genotype*Sex	1	1218.25	1218.25	4.5532	0.0335			Error	177	86872.5	490.805					Error	159	54443.5	342.412
	Rep[Genotype]	92	24724.5	268.74	1.0044	0.4765		Pgant1	Genotype	1	4622.97	4622.97	8.61	0.0038		Pgant1	Genotype	1	25575.9	25575.9	86.7343	<.0001
	Rep*Sex[Genotype]	92	88393.2	960.8	3.591	<.0001			Rep[Genotype]	93	59871.6	643.781	1.199	0.1518			Rep[Genotype]	93	45945.9	494.04	1.6754	0.002
	Error	352	94180.5	267.56					Error	178	95573.5	536.93					Error	165	48654.7	294.877
crn	Genotype	1	98773.4	98773.4	332.423	<.0001		piwi	Genotype	1	832.635	832.635	2.1727	0.1423		piwi	Genotype	1	299.294	299.294	0.9575	0.3293
	Sex	1	2915.62	2915.62	9.8125	0.0019			Rep[Genotype]	92	47080.8	511.748	1.3354	0.0529			Rep[Genotype]	91	42885.3	471.267	1.5077	0.0122
	Genotype*Sex	1	60875.3	60875.3	204.876	<.0001			Error	171	65532	383.228					Error	158	49386.2	312.571
	Rep[Genotype]	73	23092	316.33	1.0646	0.3555		pn	Genotype	1	3509.02	3509.02	6.6186	0.0109		pn	Genotype	1	1281.59	1281.59	3.3806	0.0678
	Rep*Sex[Genotype]	73	49839.5	682.73	2.2977	<.0001			Rep[Genotype]	93	48990.8	526.783	0.9936	0.5065			Rep[Genotype]	93	68235.3	733.713	1.9354	0.0001
	Error	259	76957.2	297.13					Error	180	95431.2	530.173					Error	164	62172.3	379.1
CycE	Genotype	1	3048.55	3048.55	9.637	0.0021		RpL22	Genotype	1	18325.8	18325.8	116.921	<.0001		RpL22	Genotype	1	154727	154727	1119.13	<.0001
	Sex	1	60710	60710	191.916	<.0001			Rep[Genotype]	91	29883.1	328.39	2.0951	<.0001			Rep[Genotype]	90	40473.3	449.7	3.2527	<.0001
	Genotype*Sex	1	8217.65	8217.65	25.9775	<.0001			Error	173	27115.5	156.737					Error	165	22812.3	138.26
	Rep[Genotype]	93	20732.1	222.93	0.7047	0.9777		sgg	Genotype	1	6784.69	6784.69	20.0777	<.0001		sgg	Genotype	1	176.064	176.064	0.662	0.417
	Rep*Sex[Genotype]	93	84229.3	905.69	2.8631	<.0001			Rep[Genotype]	93	51191	550.441	1.6289	0.0028			Rep[Genotype]	92	40141.4	436.319	1.6405	0.0029
	Error	338	106922	316.337					Error	178	60150.2	337.922					Error	166	44149.8	265.963
Cyp4g1	Genotype	1	109801	109802	530.597	<.0001		sov	Genotype	1	15.767	15.7674	0.0469	0.8288		sov	Genotype	1	184.627	184.627	0.56	0.4554
	Sex	1	14614	14614	70.6198	<.0001			Rep[Genotype]	92	56076.1	609.523	1.8132	0.0004			Rep[Genotype]	91	43518.1	478.221	1.4505	0.0213
	Genotype*Sex	1	29867.8	29867.8	144.331	<.0001			Error	173	58155.2	336.157					Error	154	50771.7	329.686
	Rep[Genotype]	91	38753.7	425.9	2.0579	<.0001		sra	Genotype	1	2822.8	2822.8	7.5409	0.0067		sra	Genotype	1	2023.54	2023.54	5.5545	0.0197
	Rep*Sex[Genotype]	91	45783.6	503.1	2.4312	<.0001			Rep[Genotype]	92	59321.4	644.798	1.7225	0.0012			Rep[Genotype]	90	49082.6	545.362	1.497	0.0146
	Error	337	69738.7	206.94					Error	170	63636.7	374.333					Error	150	54646	364.307		0.0019
DAAM	Genotype	1	15100.9	15100.9	69.0892	<.0001		TRAM	Genotype	1	580.69	580.691	1.0189	0.3141		TRAM	Genotype	1	3536.95	3536.95	9.9567	0.0001
	Sex	1	108174	108174	494.914	<.0001			Rep[Genotype]	94	57731.2	614.162	1.0776	0.3316			Rep[Genotype]	94	63906.9	679.861	1.9138	0.0117
	Genotype*Sex	1	229.67	229.7	1.0508	0.3061			Error	181	103156	569.924					Error	168	59679.2	355.233
	Rep[Genotype]	91	22407.1	246.2	1.1266	0.2256		wds	Genotype	1	4263.02	4263.02	21.0441	<.0001		wds	Genotype	1	1662.7	1662.7	6.5014	0.0075
	Rep*Sex[Genotype]	91	76225.2	837.6	3.8324	<.0001			Rep[Genotype]	91	41856.4	459.96	2.2706	<.0001			Rep[Genotype]	90	35889	398.766	1.5592	0.9896
	Error	341	74532.5	218.57					Error	168	34032.7	202.575					Error	159	40663.7	255.746
dnc	Genotype	1	35.629	35.63	0.108	0.7426		zf30c	Genotype	1	4631.06	4631.06	8.9971	0.0031		zf30c	Genotype	1	0.06	0.0598	0.0002	0.0003
	Sex	1	18880.8	18880.8	57.2426	<.0001			Rep[Genotype]	94	54388.4	578.6	1.1241	0.2502			Rep[Genotype]	92	59864.9	650.706	1.8542
	Genotype*Sex	1	286.025	286.03	0.8672	0.3524			Error	183	94195.2	514.728					Error	162	56851.8	350.937
	Rep[Genotype]	92	28149.4	305.97	0.9276	0.6611
	Rep*Sex[Genotype]	92	74622.8	811.12	2.4591	<.0001
	Error	331	109176	329.838
Dredd	Genotype	1	587.733	587.73	2.026	0.1556
	Sex	1	84875.1	84875.1	292.583	<.0001
	Genotype*Sex	1	18859.7	18859.7	65.0136	<.0001
	Rep[Genotype]	90	23964.1	266.27	0.9179	0.6816
	Rep*Sex[Genotype]	90	87176.6	968.63	3.3391	<.0001
	Error	328	95149.2	290.09
dx	Genotype	1	518.99	518.99	1.9124	0.1676
	Sex	1	80340	80340	296.038	<.0001
	Genotype*Sex	1	1129.23	1129.23	4.161	0.0421
	Rep[Genotype]	92	32303.4	351.12	1.2938	0.0523
	Rep*Sex[Genotype]	92	100416	1091.47	4.0219	<.0001
	Error	349	94713	271.38
egh	Genotype	1	2861.47	2861.47	7.4385	0.0067
	Sex	1	54386.4	54386.4	141.379	<.0001
	Genotype*Sex	1	15280.1	15280.1	39.7212	<.0001
	Rep[Genotype]	91	39419	433.18	1.1261	0.2275
	Rep*Sex[Genotype]	91	80787.2	887.77	2.3078	<.0001
	Error	328	126176	384.68
Eip75B	Genotype	1	1545.39	1545.4	4.6245	0.0322
	Sex	1	39887.3	39887.3	119.362	<.0001
	Genotype*Sex	1	2040.16	2040.16	6.1051	0.014
	Rep[Genotype]	91	24143.8	265.32	0.794	0.9057
	Rep*Sex[Genotype]	91	69494.1	763.67	2.2853	<.0001
	Error	333	111279	334.172
Fdx1	Genotype	1	1145.77	1145.77	2.7588	0.0976
	Sex	1	73296.8	73296.8	176.487	<.0001
	Genotype*Sex	1	745.311	745.31	1.7946	0.1812
	Rep[Genotype]	94	22436.3	238.68	0.5747	0.9992
	Rep*Sex[Genotype]	94	90066.8	958.16	2.3071	<.0001
	Error	355	147435	415.31
fs(1)N	Genotype	1	1564.01	1564	6.0397	0.0145
	Sex	1	114459	114459	442.008	<.0001
	Genotype*Sex	1	411.99	412	1.591	0.208
	Rep[Genotype]	91	22614.4	248.5	0.9597	0.5845
	Rep*Sex[Genotype]	91	99877.2	1097.6	4.2384	<.0001
	Error	352	91151.5	258.95
G9a	Genotype	1	7.9	7.9	0.0289	0.8651
	Sex	1	76527.1	76527.1	279.885	<.0001
	Genotype*Sex	1	1694.85	1694.85	6.1986	0.0132
	Rep[Genotype]	92	24731.4	268.82	0.9832	0.5279
	Rep*Sex[Genotype]	92	92705.8	1007.67	3.6854	<.0001
	Error	351	95971.5	273.42
Hsl	Genotype	1	317.07	317.1	1.073	0.301
	Sex	1	112289	112289	379.995	<.0001
	Genotype*Sex	1	455.93	455.9	1.5429	0.215
	Rep[Genotype]	91	26791.2	294.4	0.9963	0.496
	Rep*Sex[Genotype]	91	82569.6	907.4	3.0706	<.0001
	Error	341	100766	295.5
Hsp22	Genotype	1	203.15	203.1	0.6292	0.4282
	Sex	1	121035	121035	374.878	<.0001
	Genotype*Sex	1	416.93	416.9	1.2913	0.2566
	Rep[Genotype]	93	33371.7	358.8	1.1114	0.2488
	Rep*Sex[Genotype]	93	87483.1	940.7	2.9135	<.0001
	Error	352	113649	322.87
Klp67A	Genotype	1	112.508	112.51	0.3889	0.5333
	Sex	1	70404.1	70404.1	243.345	<.0001
	Genotype*Sex	1	2532.93	2532.93	8.7548	0.0033
	Rep[Genotype]	91	28265.4	310.61	1.0736	0.3224
	Rep*Sex[Genotype]	91	99199.2	1090.1	3.7678	<.0001
	Error	346	100104	289.32
l(1)G0004	Genotype	1	1005.2	1005.2	2.1872	0.1401
	Sex	1	60207.8	60207.8	131.005	<.0001
	Genotype*Sex	1	71.66	71.66	0.1559	0.6932
	Rep[Genotype]	90	20691.3	229.9	0.5002	0.9999
	Rep*Sex[Genotype]	90	104268	1158.54	2.5208	<.0001
	Error	337	154880	459.58
lama	Genotype	1	351.79	351.8	1.1137	0.292
	Sex	1	159328	159328	504.42	<.0001
	Genotype*Sex	1	7177.4	7177.4	22.723	<.0001
	Rep[Genotype]	92	29424.9	319.8	1.0126	0.4573
	Rep*Sex[Genotype]	92	96788.9	1052.1	3.3307	<.0001
	Error	342	108026	315.86
Lztr1	Genotype	1	2131.22	2131.2	6.2151	0.0131
	Sex	1	109686	109686	319.868	<.0001
	Genotype*Sex	1	851.88	851.9	2.4843	0.1159
	Rep[Genotype]	91	38197.1	419.7	1.2241	0.1033
	Rep*Sex[Genotype]	91	83355.2	916	2.6712	<.0001
	Error	336	115218	342.91
MED22	Genotype	1	1751.02	1751.02	5.4245	0.0205
	Sex	1	66361	66361	205.579	<.0001
	Genotype*Sex	1	10660.2	10660.2	33.0242	<.0001
	Rep[Genotype]	91	18750.5	206.05	0.6383	0.9943
	Rep*Sex[Genotype]	91	84686.8	930.62	2.883	<.0001
	Error	332	107170	322.8
msn	Genotype	1	5608.64	5608.64	13.3672	0.0003
	Sex	1	44015.4	44015.4	104.903	<.0001
	Genotype*Sex	1	3086.97	3086.97	7.3572	0.007
	Rep[Genotype]	90	26612.3	295.69	0.7047	0.976
	Rep*Sex[Genotype]	90	67271.1	747.46	1.7814	0.0001
	Error	332	139302	419.583
ND-ACP	Genotype	1	58573.1	58573.1	316.757	<.0001
	Sex	1	3881.58	3881.58	20.9912	<.0001
	Genotype*Sex	1	62550.6	62550.6	338.267	<.0001
	Rep[Genotype]	89	19731	221.7	1.1989	0.1298
	Rep*Sex[Genotype]	89	57981.9	651.48	3.5231	<.0001
	Error	339	62686.2	184.91
Nmd3	Genotype	1	472.054	472.054	1.4974	0.2219
	Sex	1	6238.66	6238.66	19.7897	<.0001
	Genotype*Sex	1	5710.03	5710.03	18.1129	<.0001
	Rep[Genotype]	91	35243.6	387.292	1.2285	0.0995
	Rep*Sex[Genotype]	91	59137.7	649.864	2.0614	<.0001
	Error	333	104977	315.247
pcx	Genotype	1	7434.93	7434.93	18.1184	<.0001
	Sex	1	67515	67515	164.529	<.0001
	Genotype*Sex	1	633.021	633.02	1.5426	0.2151
	Rep[Genotype]	90	26295.7	292.17	0.712	0.9725
	Rep*Sex[Genotype]	90	79091.4	878.79	2.1416	<.0001
	Error	330	135417	410.35
Pgant1	Genotype	1	4275.64	4275.64	10.2086	0.0015
	Sex	1	41141.8	41141.8	98.2307	<.0001
	Genotype*Sex	1	25396.5	25396.5	60.637	<.0001
	Rep[Genotype]	92	27800.2	302.18	0.7215	0.9691
	Rep*Sex[Genotype]	92	75019.3	815.43	1.9469	<.0001
	Error	339	141983	418.828
piwi	Genotype	1	1283.92	1283.92	3.6665	0.0564
	Sex	1	27098.3	27098.3	77.3848	<.0001
	Genotype*Sex	1	121.391	121.39	0.3467	0.5564
	Rep[Genotype]	91	22559.6	247.91	0.708	0.9749
	Rep*Sex[Genotype]	91	65270.1	717.25	2.0483	<.0001
	Error	328	114858	350.176
pn	Genotype	1	176.852	176.85	0.3853	0.5352
	Sex	1	92924.1	92924.1	202.425	<.0001
	Genotype*Sex	1	4211.42	4211.42	9.1741	0.0026
	Rep[Genotype]	93	24445.1	262.85	0.5726	0.9992
	Rep*Sex[Genotype]	93	92686.8	996.63	2.1711	<.0001
	Error	344	157915	459.05
RpL22	Genotype	1	139901	139901	936.201	<.0001
	Sex	1	16028.3	16028.3	107.259	<.0001
	Genotype*Sex	1	33476.7	33476.7	224.022	<.0001
	Rep[Genotype]	89	15955.6	179.3	1.1997	0.1296
	Rep*Sex[Genotype]	89	53420.6	600.2	4.0167	<.0001
	Error	332	49612.5	149.44
sgg	Genotype	1	4010.09	4010.09	13.1952	0.0003
	Sex	1	12601.8	12601.8	41.4661	<.0001
	Genotype*Sex	1	1963.34	1963.34	6.4604	0.0115
	Rep[Genotype]	92	21667.2	235.51	0.775	0.9283
	Rep*Sex[Genotype]	92	67517.3	733.88	2.4148	<.0001
	Error	343	104240	303.905
sov	Genotype	1	253.534	253.53	0.7592	0.3842
	Sex	1	22355.7	22355.7	66.9441	<.0001
	Genotype*Sex	1	13.717	13.72	0.0411	0.8395
	Rep[Genotype]	91	23510.4	258.36	0.7736	0.9278
	Rep*Sex[Genotype]	91	73260.9	805.06	2.4108	<.0001
	Error	326	108866	333.946
sra	Genotype	1	4835.29	4835.29	13.402	0.0003
	Sex	1	24634.8	24634.8	68.2805	<.0001
	Genotype*Sex	1	36.465	36.46	0.1011	0.7508
	Rep[Genotype]	89	23792.8	267.33	0.741	0.9537
	Rep*Sex[Genotype]	89	80817	908.06	2.5169	<.0001
	Error	316	114009	360.789
TRAM	Genotype	1	672.235	672.24	1.4408	0.2308
	Sex	1	33200.7	33200.7	71.158	<.0001
	Genotype*Sex	1	3537.12	3537.12	7.581	0.0062
	Rep[Genotype]	94	24856.7	264.43	0.5668	0.9994
	Rep*Sex[Genotype]	94	97738.9	1039.78	2.2285	<.0001
	Error	349	162835	466.577
wds	Genotype	1	5195.33	5195.33	23.052	<.0001
	Sex	1	18163.4	18163.4	80.5922	<.0001
	Genotype*Sex	1	300.208	300.21	1.332	0.2493
	Rep[Genotype]	89	19009.3	213.59	0.9477	0.6114
	Rep*Sex[Genotype]	89	57296.6	643.78	2.8565	<.0001
	Error	321	72345	225.374
zf30c	Genotype	1	1894.72	1894.72	4.2801	0.0393
	Sex	1	38010.3	38010.3	85.8643	<.0001
	Genotype*Sex	1	1864.2	1864.2	4.2112	0.0409
	Rep[Genotype]	92	20918.7	227.38	0.5136	0.9999
	Rep*Sex[Genotype]	92	90450.3	983.16	2.2209	<.0001
	Error	339	150068	442.679

## Sheet: Table S9
A. Full ANOVA Models								B. Effect and p-Value Summaries
Gene	Source	DF	SS	MS	F Ratio	Prob > F		Gene	Difference	SE Difference	Lower CL	Upper CL	p-Value
abo	Line	1	529.504	529.504	0.8725	0.3596		abo	9.02564	9.66241	-10.9166	28.9679	0.3596
	Error	24	14564.5	606.855				babos	19.0128	15.71	-13.4109	51.4366	0.238
babos	Line	1	2349.67	2349.67	1.4647	0.238		blw	-111.692	4.03091	-120.012	-103.373	<.0001
	Error	24	38501.3	1604.22				boi	-28.0128	15.0855	-59.1477	3.12207	0.0756
blw	Line	1	81088.6	81088.6	767.787	<.0001		capu	-2.41026	18.5466	-40.6886	35.8681	0.8977
	Error	24	2534.72	105.6				Cdc7	-4.75641	7.54186	-20.322	10.8092	0.5342
boi	Line	1	5100.67	5100.67	3.4482	0.0756		CG12018	-8.03846	10.9697	-30.6788	14.6019	0.4708
	Error	24	35501.2	1479.22				CG13369	0.0384614	10.3678	-21.3596	21.4365	0.9971
capu	Line	1	37.7607	37.7607	0.0169	0.8977		CG13760	-13.9872	12.1704	-39.1057	11.1313	0.2618
	Error	24	53660.5	2235.85				CG13933	-26.0128	11.5379	-49.8258	-2.19982	0.0336
Cdc7	Line	1	147.052	147.052	0.3977	0.5342		CG14969	-21.8333	5.00015	-32.1531	-11.5135	0.0002
	Error	24	8873.23	369.718				CG16868	-2.5641	16.448	-36.511	31.3828	0.8774
CG3071	Line	1	1772.38	1772.38	1.1774	0.2887		CG17777	-32.3974	12.0982	-57.3669	-7.42796	0.0132
	Error	24	36127.3	1505.3				CG18273	-13.5256	15.7578	-46.0482	18.9969	0.3992
CG3326	Line	1	146.261	146.261	0.1275	0.7241		CG3071	16.5128	15.2179	-14.8954	47.9211	0.2887
	Error	24	27523.2	1146.8				CG32809	-1.01282	14.699	-31.35	29.3244	0.9456
CG3704	Line	1	2915.71	2915.71	1.789	0.1936		CG3326	4.74359	13.2827	-22.6706	32.1578	0.7241
	Error	24	39116.2	1629.84				CG3704	21.1795	15.8349	-11.5022	53.8612	0.1936
CG4281	Line	1	86.7788	86.7788	0.101	0.7534		CG4281	3.65385	11.4987	-20.0784	27.3861	0.7534
	Error	24	20626.4	859.435				CG4452	-18.3333	10.9891	-41.0137	4.34705	0.1082
CG4452	Line	1	2184.72	2184.72	2.7833	0.1082		CG4554	-5.85897	11.186	-28.9456	17.2277	0.6052
	Error	24	18838.6	784.94				CG5254	-32.5897	6.51144	-46.0287	-19.1508	<.0001
CG4554	Line	1	223.129	223.129	0.2743	0.6052		CG7970	-2.3718	12.6433	-28.4664	23.7228	0.8528
	Error	24	19519.6	813.316				CG7971	-69.0385	9.64627	-88.9474	-49.1295	<.0001
CG5254	Line	1	6903.59	6903.59	25.05	<.0001		crn	-128.987	11.6601	-153.052	-104.922	<.0001
	Error	24	6614.23	275.59				CycE	-32.8974	14.1455	-62.0922	-3.70265	0.0288
CG7970	Line	1	36.5652	36.5652	0.0352	0.8528		Cyp4g1	-109.038	9.24807	-128.126	-89.9514	<.0001
	Error	24	24937.2	1039.05				DAAM	3.94872	13.4446	-23.7996	31.6971	0.7715
CG7971	Line	1	30981	30981	51.2228	<.0001		dnc	9.85897	17.4665	-26.19	45.908	0.5777
	Error	24	14515.9	604.8				Dredd	-39.4615	9.3905	-58.8426	-20.0805	0.0003
CG12018	Line	1	420.01	420.01	0.537	0.4708		dx	-17.6795	11.8308	-42.097	6.73803	0.1481
	Error	24	18772.1	782.172				egh	-10.3333	13.2832	-37.7486	17.0819	0.4442
CG13369	Line	1	0.00961531	0.0096153	0	0.9971		Eip75B	-13.4744	15.0803	-44.5986	17.6499	0.3805
	Error	24	16768.6	698.691				Fdx1	-21.8974	6.32588	-34.9534	-8.84146	0.002
CG13760	Line	1	1271.67	1271.67	1.3208	0.2618		fs(1)N	-13.0128	13.5411	-40.9602	14.9346	0.3461
	Error	24	23106.5	962.77				G9a	-2.52564	13.2078	-29.7852	24.7339	0.85
CG13933	Line	1	4398.33	4398.33	5.083	0.0336		Hsl	-13.3974	10.8426	-35.7755	8.98066	0.2286
	Error	24	20767.1	865.3				Hsp22	-5.23077	12.7887	-31.6253	21.1637	0.6862
CG14969	Line	1	3098.51	3098.51	19.0666	0.0002		Klp67A	-4.73077	11.3865	-28.2314	18.7698	0.6815
	Error	24	3900.24	162.51				l(1)G0004	-21.3077	6.59459	-34.9183	-7.69712	0.0036
CG16868	Line	1	42.735	42.735	0.0243	0.8774		lama	-15.1154	12.157	-40.2062	9.97546	0.2257
	Error	24	42203.5	1758.48				Lztr1	5.24359	15.0021	-25.7193	36.2065	0.7297
CG17777	Line	1	6822.36	6822.36	7.171	0.0132		MED22	-16.4487	15.4387	-48.3125	15.4151	0.2973
	Error	24	22833.2	951.38				msn	-1	15.7211	-33.4468	31.4468	0.9498
CG18273	Line	1	1189.13	1189.13	0.7368	0.3992		ND-ACP	-95.4231	9.38913	-114.801	-76.0449	<.0001
	Error	24	38736.3	1614.01				Nmd3	-11.2821	17.468	-47.3343	24.7702	0.5245
CG32809	Line	1	6.66774	6.66774	0.0047	0.9456		pcx	-1.98718	6.2947	-14.9788	11.0045	0.755
	Error	24	33705.3	1404.39				Pgant1	-5.47436	13.5056	-33.3485	22.3998	0.6888
crn	Line	1	108145	108145	122.375	<.0001		piwi	13.6026	15.8246	-19.0577	46.2628	0.3985
	Error	24	21209.3	884				pn	-13.6538	8.51763	-31.2334	3.92567	0.122
CycE	Line	1	7034.57	7034.57	5.4087	0.0288		RpL22	-99.7051	9.36583	-119.035	-80.375	<.0001
	Error	24	31214.7	1300.61				sgg	4.82051	15.6008	-27.378	37.0191	0.76
Cyp4g1	Line	1	77281	77281	139.013	<.0001		sov	18.1795	14.337	-11.4107	47.7697	0.217
	Error	24	13342.2	555.9				sra	11.1026	13.6114	-16.99	39.1951	0.4227
DAAM	Line	1	101.35	101.35	0.0863	0.7715		TRAM	-8.53846	10.2434	-29.6798	12.6029	0.4128
	Error	24	28198.3	1174.93				wds	1.76923	9.69379	-18.2378	21.7762	0.8567
dnc	Line	1	631.796	631.796	0.3186	0.5777		zf30c	43.5128	9.60143	23.6964	63.3292	0.0001
	Error	24	47592	1983
Dredd	Line	1	10121.9	10121.9	17.6592	0.0003
	Error	24	13756.3	573.2
dx	Line	1	2031.67	2031.67	2.2331	0.1481
	Error	24	21834.9	909.79
egh	Line	1	694.055	694.056	0.6052	0.4442
	Error	24	27525.3	1146.89
Eip75B	Line	1	1180.13	1180.13	0.7984	0.3805
	Error	24	35476.9	1478.2
Fdx1	Line	1	3116.74	3116.74	11.9824	0.002
	Error	24	6242.62	260.11
fs(1)N	Line	1	1100.67	1100.67	0.9235	0.3461
	Error	24	28604.2	1191.84
G9a	Line	1	41.4626	41.4626	0.0366	0.85
	Error	24	27213.6	1133.9
Hsl	Line	1	1166.69	1166.69	1.5268	0.2286
	Error	24	18339.8	764.16
Hsp22	Line	1	177.846	177.846	0.1673	0.6862
	Error	24	25513.8	1063.07
Klp67A	Line	1	145.471	145.471	0.1726	0.6815
	Error	24	20225.8	842.741
l(1)G0004	Line	1	2951.12	2951.11	10.4399	0.0036
	Error	24	6784.23	282.68
lama	Line	1	1485.09	1485.09	1.5459	0.2257
	Error	24	23055.7	960.65
Lztr1	Line	1	178.719	178.719	0.1222	0.7297
	Error	24	35110	1462.92
MED22	Line	1	1758.64	1758.64	1.1351	0.2973
	Error	24	37182.9	1549.29
msn	Line	1	6.50001	6.50001	0.004	0.9498
	Error	24	38555.9	1606.5
ND-ACP	Line	1	59186.2	59186.2	103.289	<.0001
	Error	24	13752.3	573
Nmd3	Line	1	827.35	827.351	0.4171	0.5245
	Error	24	47600.5	1983.35
pcx	Line	1	25.6677	25.6677	0.0997	0.755
	Error	24	6181.24	257.551
Pgant1	Line	1	194.796	194.796	0.1643	0.6888
	Error	24	28454.5	1185.6
piwi	Line	1	1202.69	1202.69	0.7389	0.3985
	Error	24	39064.9	1627.71
pn	Line	1	1211.78	1211.78	2.5696	0.122
	Error	24	11317.8	471.57
RpL22	Line	1	64617.2	64617.2	113.329	<.0001
	Error	24	13684.1	570.2
sgg	Line	1	151.043	151.043	0.0955	0.76
	Error	24	37968.2	1582.01
sov	Line	1	2148.21	2148.21	1.6078	0.217
	Error	24	32065.9	1336.08
sra	Line	1	801.235	801.235	0.6653	0.4227
	Error	24	28902.1	1204.25
TRAM	Line	1	473.885	473.885	0.6948	0.4128
	Error	24	16368.7	682.03
wds	Line	1	20.3461	20.3462	0.0333	0.8567
	Error	24	14659.3	610.803
zf30c	Line	1	12306.9	12306.9	20.5382	0.0001
	Error	24	14381.2	599.2

## Sheet: Table S10
A. Full ANOVA Models								B. ANOVA Models by Week								C. Effect and p-Value Summaries
Gene	Source	DF	SS	MS	F Ratio	Prob > F		Gene	Source	DF	SS	MS	F Ratio	Prob > F		Gene	Week	Difference	SE Difference	Lower CL	Upper CL	p-Value
abo	Line	1	273.543	273.543	5.7701	0.0174		abo	Line	1	273.543	273.543	2.9365	0.0995		abo	1	6.48718	3.78566	-1.32605	14.3004	0.0995
	Week	6	34360.8	5726.79	120.8	<.0001			Error	24	2235.68	93.153					2	-9.12821	3.4729	-16.2959	-1.96049	0.0147
	Line*Week	6	956.596	159.433	3.3631	0.0037			Line	1	541.607	541.607	6.9085	0.0147			3	4.23077	3.29182	-2.56321	11.0247	0.211
	Error	168	7964.39	47.41					Error	24	1881.52	78.397					4	1.28205	2.03247	-2.91277	5.47687	0.5341
babos	Line	1	119.184	119.184	1.4513	0.2296			Line	1	116.346	116.346	1.6518	0.211			5	2.8718	2.2696	-1.81244	7.55603	0.2179
	Week	8	33681.8	4210.23	51.2674	<.0001			Error	24	1690.43	70.434					6	1.97436	1.98123	-2.1147	6.06341	0.3289
	Line*Week	8	704.354	88.044	1.0721	0.3838			Line	1	10.6838	10.6838	0.3979	0.5341			7	1.30769	0.786209	-0.314963	2.93035	0.1093
	Error	216	17738.5	82.12					Error	24	644.427	26.8511				babos	1	4.28205	1.79789	0.571386	7.99272	0.0255
blw	Line	1	3546.67	3546.67	343.731	<.0001			Line	1	53.6068	53.6068	1.6011	0.2179			2	2.78205	1.86047	-1.05777	6.62187	0.1479
	Week	9	10303.1	1144.79	110.949	<.0001			Error	24	803.573	33.4822					3	2.78205	4.94897	-7.43212	12.9962	0.5792
	Line*Week	9	10063.5	1118.17	108.369	<.0001			Line	1	25.3376	25.3376	0.9931	0.3289			4	8.15385	7.01296	-6.32019	22.6279	0.2564
	Error	240	2476.36	10.32					Error	24	612.342	25.5142					5	2.57692	4.49039	-6.69078	11.8446	0.5714
boi	Line	1	538.568	538.568	6.4348	0.0119			Line	1	11.1154	11.1154	2.7665	0.1093			6	-5.78205	1.93233	-9.77018	-1.79392	0.0063
	Week	8	27202	3400.25	40.6258	<.0001			Error	24	96.4274	4.0178					7	2.26923	2.75732	-3.42161	7.96007	0.4186
	Line*Week	8	1181.73	147.716	1.7649	0.0854		babos	Line	1	119.184	119.184	5.6725	0.0255			8	1.71795	1.3369	-1.04128	4.47718	0.211
	Error	216	18078.5	83.7					Error	24	504.256	21.011					9	0.230769	0.230769	-0.245515	0.707054	0.3273
capu	Line	1	4.94	4.94	0.0627	0.8025			Line	1	50.3088	50.3088	2.2361	0.1479		blw	1	-23.359	1.01625	-25.4564	-21.2615	<.0001
	Week	9	62878.8	6986.53	88.6557	<.0001			Error	24	539.97	22.4988					2	-36.2051	2.23465	-40.8172	-31.593	<.0001
	Line*Week	9	2272.67	252.519	3.2043	0.0011			Line	1	50.3088	50.3088	0.316	0.5792			3	-26.4359	2.30574	-31.1947	-21.6771	<.0001
	Error	240	18913.3	78.81					Error	24	3820.8	159.2					4	-13.141	1.15236	-15.5194	-10.7627	<.0001
Cdc7	Line	1	607.389	607.389	20.4316	<.0001			Line	1	432.154	432.154	1.3518	0.2564			5	-6.60256	0.995635	-8.65745	-4.54767	<.0001
	Week	9	40820.5	4535.61	152.571	<.0001			Error	24	7672.33	319.68					6	-4.79487	1.37685	-7.63655	-1.9532	0.0019
	Line*Week	9	739.578	82.175	2.7642	0.0043			Line	1	43.1635	43.1635	0.3293	0.5714			7	-1.07692	0.557139	-2.2268	0.0729562	0.0651
	Error	240	7134.7	29.73					Error	24	3145.52	131.063					8	-0.076923	0.0769231	-0.235685	0.0818384	0.3273
CG3071	Line	1	4.107	4.107	0.0692	0.7928			Line	1	217.309	217.309	8.9537	0.0063		boi	1	-9.10256	1.69166	-12.594	-5.61115	<.0001
	Week	9	57590.7	6398.97	107.799	<.0001			Error	24	582.487	24.27					2	-4.67949	2.91676	-10.6994	1.34041	0.1217
	Line*Week	9	519.987	57.776	0.9733	0.4627			Line	1	33.4712	33.4712	0.6773	0.4186			3	6.74359	6.58693	-6.85117	20.3383	0.3161
	Error	240	14246.5	59.36					Error	24	1186.04	49.4184					4	-6.41026	6.14956	-19.1023	6.28182	0.3076
CG3326	Line	1	267.094	267.094	4.2525	0.0407			Line	1	19.1838	19.1838	1.6513	0.211			5	-6.9359	4.21071	-15.6264	1.75458	0.1125
	Week	6	34049.5	5674.92	90.3524	<.0001			Error	24	278.821	11.6175					6	-4.52564	2.04878	-8.75412	-0.29716	0.037
	Line*Week	6	1197.61	199.602	3.1779	0.0056			Line	1	0.346154	0.346154	1	0.3273			7	-3.01282	1.16925	-5.42603	-0.599614	0.0166
	Error	168	10551.9	62.81					Error	24	8.30769	0.346154					8	-0.089744	0.138081	-0.374729	0.195242	0.5219
CG3704	Line	1	1047.12	1047.12	15.7017	<.0001		blw	Line	1	3546.67	3546.67	528.332	<.0001		capu	1	0.871795	2.2771	-3.82791	5.5715	0.7052
	Week	9	61216.3	6801.81	101.994	<.0001			Error	24	161.111	6.71					2	9.51282	3.64118	1.99779	17.0279	0.0153
	Line*Week	9	1894.94	210.549	3.1572	0.0013			Line	1	8520.27	8520.27	262.496	<.0001			3	4.73077	4.47924	-4.51394	13.9755	0.3014
	Error	240	16005.1	66.69					Error	24	779.009	32.46					4	6.20513	5.67075	-5.49872	17.909	0.2847
CG4281	Line	1	338.642	338.642	7.8073	0.0057			Line	1	4542.57	4542.57	131.452	<.0001			5	-8.66667	5.54379	-20.1085	2.77515	0.1311
	Week	8	28690.1	3586.27	82.6807	<.0001			Error	24	829.363	34.56					6	-9.74359	3.81066	-17.6084	-1.87877	0.0173
	Line*Week	8	822.793	102.849	2.3712	0.0182			Line	1	1122.46	1122.46	130.041	<.0001			7	-5.29487	2.3063	-10.0548	-0.534909	0.0307
	Error	216	9368.98	43.37					Error	24	207.158	8.63					8	-0.025641	0.025641	-0.078561	0.0272794	0.3273
CG4452	Line	1	0.068	0.068	0.0011	0.9733			Line	1	283.36	283.36	43.977	<.0001		Cdc7	1	-9.66667	1.79518	-13.3717	-5.9616	<.0001
	Week	6	28078.9	4679.81	77.1547	<.0001			Error	24	154.641	6.443					2	3.69231	3.63936	-3.81895	11.2036	0.3204
	Line*Week	6	1801.75	300.291	4.9508	0.0001			Line	1	149.44	149.44	12.1278	0.0019			3	0.487179	4.50503	-8.81074	9.7851	0.9148
	Error	168	10190	60.65					Error	24	295.731	12.322					4	0.0641025	1.84842	-3.75085	3.87906	0.9726
CG4554	Line	1	631.796	631.796	15.45	0.0001			Line	1	7.53846	7.53846	3.7363	0.0651			5	2.35897	1.59568	-0.934342	5.65229	0.1523
	Week	8	25461.2	3182.64	77.8288	<.0001			Error	24	48.4231	2.01763					6	-1.76923	1.579	-5.02812	1.48966	0.2736
	Line*Week	8	1517.31	189.663	4.638	<.0001			Line	1	0.0384615	0.0384615	1	0.3273			7	0.153846	0.714411	-1.32062	1.62832	0.8313
	Error	216	8832.86	40.89					Error	24	0.923077	0.038462					8	-0.076923	0.0769231	-0.235685	0.0818384	0.3273
CG5254	Line	1	10.261	10.261	0.4835	0.4875		boi	Line	1	538.568	538.568	28.9535	<.0001		CG3071	1	0.794872	2.11853	-3.57756	5.1673	0.7108
	Week	9	35373.1	3930.35	185.21	<.0001			Error	24	446.427	18.601					2	2.41026	3.94881	-5.73968	10.5602	0.5473
	Line*Week	9	541.203	60.134	2.8337	0.0035			Line	1	142.334	142.334	2.5739	0.1217			3	5.25641	2.87087	-0.668783	11.1816	0.0796
	Error	240	5093.06	21.22					Error	24	1327.17	55.299					4	8.0641	3.48719	0.866885	15.2613	0.0296
CG7970	Line	1	294.471	294.471	5.6046	0.0188			Line	1	295.594	295.594	1.0481	0.3161			5	1.46154	4.78979	-8.4241	11.3472	0.7629
	Week	8	28798.1	3599.76	68.5134	<.0001			Error	24	6768.48	282.02					6	0.435897	4.31816	-8.47635	9.34815	0.9204
	Line*Week	8	874.752	109.344	2.0811	0.0388			Line	1	267.094	267.094	1.0866	0.3076			7	-2.37179	3.0022	-8.56804	3.82445	0.4373
	Error	216	11348.8	52.54					Error	24	5899.47	245.811					8	0.461539	0.487854	-0.545342	1.46842	0.3535
CG7971	Line	1	2049.39	2049.39	70.7265	<.0001			Line	1	312.693	312.693	2.7133	0.1125		CG3326	1	6.41026	4.44206	-2.7577	15.5782	0.1619
	Week	8	15605.8	1950.73	67.3216	<.0001			Error	24	2765.89	115.245					2	-10.4103	4.02907	-18.7258	-2.09467	0.0163
	Line*Week	8	3482.72	435.34	15.024	<.0001			Line	1	133.129	133.129	4.8794	0.037			3	2.53846	3.48209	-4.64821	9.72513	0.4731
	Error	216	6258.86	28.98					Error	24	654.812	27.284					4	5.07692	2.91446	-0.938229	11.0921	0.0943
CG12018	Line	1	278.975	278.975	6.6931	0.0103			Line	1	59.0011	59.0011	6.6395	0.0166			5	1.35897	2.60649	-4.02055	6.7385	0.6069
	Week	8	30345.1	3793.13	91.0033	<.0001			Error	24	213.274	8.8864					6	-1.51282	1.85181	-5.33478	2.30913	0.422
	Line*Week	8	396.13	49.516	1.188	0.3074			Line	1	0.0523505	0.0523505	0.4224	0.5219			7	1.28205	0.912631	-0.601526	3.16563	0.1729
	Error	216	9003.15	41.68					Error	24	2.97436	0.123932				CG3704	1	12.6923	2.07808	8.40335	16.9813	<.0001
CG13369	Line	1	122.779	122.779	2.752	0.0986		capu	Line	1	4.94017	4.94017	0.1466	0.7052			2	6.07692	3.04368	-0.204927	12.3588	0.0573
	Week	8	31008.5	3876.07	86.8788	<.0001			Error	24	808.889	33.7037					3	6.01282	3.21414	-0.620832	12.6465	0.0736
	Line*Week	8	831.077	103.885	2.3285	0.0204			Line	1	588.209	588.209	6.8255	0.0153			4	7.58974	4.21182	-1.10302	16.2825	0.0841
	Error	216	9636.77	44.61					Error	24	2068.28	86.178					5	-5.07692	5.05286	-15.5055	5.35166	0.325
CG13760	Line	1	668.463	668.463	13.7528	0.0003			Line	1	145.471	145.471	1.1155	0.3014			6	-2.66667	5.13083	-13.2562	7.92284	0.608
	Week	8	30049.4	3756.18	77.2787	<.0001			Error	24	3129.93	130.414					7	-3.42308	3.01448	-9.64466	2.7985	0.2674
	Line*Week	8	608.1	76.012	1.5639	0.1371			Line	1	250.274	250.274	1.1973	0.2847			8	-0.025641	0.025641	-0.078561	0.0272794	0.3273
	Error	216	10498.8	48.61					Error	24	5016.56	209.023				CG4281	1	-7.21795	1.84928	-11.0347	-3.40122	0.0007
CG13933	Line	1	631.796	631.796	14.8662	0.0002			Line	1	488.222	488.222	2.4439	0.1311			2	-2.37179	3.10413	-8.7784	4.03481	0.4523
	Week	8	25928.5	3241.07	76.2623	<.0001			Error	24	4794.44	199.768					3	-0.025641	3.65424	-7.56763	7.51635	0.9945
	Line*Week	8	673.372	84.172	1.9806	0.0501			Line	1	617.094	617.094	6.5379	0.0173			4	3.47436	4.70345	-6.23309	13.1818	0.4673
	Error	216	9179.77	42.5					Error	24	2265.3	94.387					5	7.28205	2.78598	1.53208	13.032	0.0152
CG14969	Line	1	46.222	46.222	2.8399	0.0932			Line	1	182.232	182.232	5.2708	0.0307			6	2.28205	1.93124	-1.70382	6.26793	0.2489
	Week	9	37123.1	4124.79	253.432	<.0001			Error	24	829.765	34.574					7	0.179487	0.179487	-0.190956	0.54993	0.3273
	Line*Week	9	202.84	22.538	1.3847	0.1956			Line	1	0.0042735	0.0042735	1	0.3273			8	0.0512821	0.0512821	-0.054559	0.157123	0.3273
	Error	240	3906.18	16.28					Error	24	0.102564	0.004273				CG4452	1	0.102564	3.79247	-7.72472	7.92985	0.9786
CG16868	Line	1	176.107	176.107	1.921	0.1672		Cdc7	Line	1	607.389	607.389	28.9961	<.0001			2	-17.8718	4.71733	-27.6079	-8.1357	0.0009
	Week	8	29278	3659.76	39.9222	<.0001			Error	24	502.735	20.947					3	-1.30769	3.1818	-7.8746	5.25921	0.6847
	Line*Week	8	241.809	30.226	0.3297	0.954			Line	1	88.6154	88.6154	1.0293	0.3204			4	1.48718	2.97019	-4.643	7.61736	0.6211
	Error	216	19801.2	91.67					Error	24	2066.21	86.0919					5	0.230769	2.43767	-4.80034	5.26188	0.9254
CG17777	Line	1	25.668	25.668	0.4344	0.5105			Line	1	1.54274	1.54273	0.0117	0.9148			6	-1.30769	1.89504	-5.21886	2.60347	0.4968
	Week	8	31414	3926.74	66.4535	<.0001			Error	24	3166.06	131.919					7	0.333333	0.453032	-0.601678	1.26835	0.469
	Line*Week	8	615.064	76.883	1.3011	0.2442			Line	1	0.0267094	0.0267094	0.0012	0.9726		CG4554	1	-9.85897	1.74985	-13.4705	-6.24747	<.0001
	Error	216	12763.5	59.09					Error	24	533	22.2083					2	-7.65385	2.89828	-13.6356	-1.6721	0.0143
CG18273	Line	1	60.517	60.517	0.8315	0.3629			Line	1	36.1709	36.1709	2.1855	0.1523			3	-2.20513	3.50487	-9.43883	5.02857	0.5352
	Week	8	37585.2	4698.15	64.5531	<.0001			Error	24	397.205	16.5502					4	5.60256	4.39436	-3.46694	14.6721	0.2145
	Line*Week	8	267.933	33.492	0.4602	0.8831			Line	1	20.3462	20.3462	1.2555	0.2736			5	6.48718	2.91702	0.466753	12.5076	0.0358
	Error	216	15720.4	72.78					Error	24	388.944	16.206					6	1.76923	2.24843	-2.8713	6.40977	0.4391
CG32809	Line	1	396.24	396.24	7.2897	0.0075			Line	1	0.153846	0.153846	0.0464	0.8313		CG5254	1	-1.25641	1.75199	-4.87234	2.35952	0.4802
	Week	8	22189.2	2773.65	51.0275	<.0001			Error	24	79.6197	3.31749					2	-7	2.76478	-12.7062	-1.29378	0.0183
	Line*Week	8	3043.16	380.395	6.9982	<.0001			Line	1	0.0384615	0.0384615	1	0.3273			3	-5.85897	3.69358	-13.4821	1.76419	0.1258
	Error	216	11740.9	54.36					Error	24	0.923077	0.038462					4	-7.23077	2.11008	-11.5858	-2.87578	0.0022
crn	Line	1	3065.85	3065.85	77.3728	<.0001		CG3071	Line	1	4.10684	4.10684	0.1408	0.7108			5	-5.37179	1.27337	-7.9999	-2.74369	0.0003
	Week	8	7288.16	911.019	22.9914	<.0001			Error	24	700.154	29.1731					6	-4.71795	1.37899	-7.56405	-1.87184	0.0022
	Line*Week	8	6882	860.25	21.7101	<.0001			Line	1	37.7607	37.7607	0.3726	0.5473			7	-1.07692	0.557139	-2.2268	0.0729562	0.0651
	Error	216	8558.87	39.62					Error	24	2432.52	101.355					8	-0.076923	0.0769231	-0.235685	0.0818384	0.3273
CycE	Line	1	28.735	28.735	0.5217	0.4708			Line	1	179.594	179.594	3.3524	0.0796		CG7970	1	-6.73077	2.20953	-11.291	-2.17052	0.0056
	Week	9	48518	5390.89	97.8729	<.0001			Error	24	1285.74	53.572					2	-5.14103	3.0806	-11.4991	1.21702	0.1081
	Line*Week	9	1167.33	129.704	2.3548	0.0145			Line	1	422.693	422.693	5.3476	0.0296			3	-0.205128	4.03801	-8.53917	8.12891	0.9599
	Error	240	13219.3	55.08					Error	24	1897.04	79.043					4	5.44872	5.24328	-5.37287	16.2703	0.3091
Cyp4g1	Line	1	8708.36	8708.36	241.742	<.0001			Line	1	13.8846	13.8846	0.0931	0.7629			5	5.64103	3.55933	-1.70508	12.9871	0.1261
	Week	8	9860.29	1232.54	34.2149	<.0001			Error	24	3578.96	149.123					6	-1.38462	1.38224	-4.23742	1.46819	0.3265
	Line*Week	8	9561.5	1195.19	33.1781	<.0001			Line	1	1.23504	1.23504	0.0102	0.9204		CG7971	1	-17.7564	1.74997	-21.3682	-14.1446	<.0001
	Error	216	7781.05	36.02					Error	24	2908.86	121.202					2	-17.9872	2.82536	-23.8184	-12.1559	<.0001
DAAM	Line	1	404.087	404.087	8.3093	0.0043			Line	1	36.5652	36.5652	0.6241	0.4373			3	-16.1282	3.24236	-22.8201	-9.43629	<.0001
	Week	8	25965.4	3245.68	66.7416	<.0001			Error	24	1406.06	58.586					4	-12.3205	3.67678	-19.909	-4.73202	0.0027
	Line*Week	8	1586.82	198.353	4.0788	0.0002			Line	1	1.38462	1.38461	0.895	0.3535			5	-3.61538	1.7657	-7.2596	0.0288348	0.0517
	Error	216	10504.2	48.63					Error	24	37.1282	1.54701					6	-1.25641	1.38778	-4.12064	1.60782	0.3743
dnc	Line	1	1.235	1.235	0.0168	0.8968		CG3326	Line	1	267.094	267.094	2.0825	0.1619			7	0.025641	0.025641	-0.027279	0.0785614	0.3273
	Week	9	56215.3	6246.14	85.2033	<.0001			Error	24	3078.17	128.257				CG12018	1	-6.55128	1.76413	-10.1923	-2.9103	0.0011
	Line*Week	9	802.753	89.195	1.2167	0.2852			Line	1	704.427	704.427	6.676	0.0163			2	-2.83333	3.09347	-9.21793	3.55126	0.3688
	Error	240	17594.1	73.31					Error	24	2532.41	105.517					3	2.89744	3.61885	-4.57151	10.3664	0.4312
Dredd	Line	1	264.962	264.962	5.7546	0.0175			Line	1	41.8846	41.8846	0.5314	0.4731			4	-2.5	4.59693	-11.9876	6.9876	0.5916
	Week	6	30836	5139.33	111.618	<.0001			Error	24	1891.49	78.812					5	1.48718	2.86802	-4.43211	7.40647	0.6088
	Line*Week	6	643.713	107.286	2.3301	0.0346			Line	1	167.538	167.538	3.0345	0.0943			6	-0.564103	1.60525	-3.87717	2.74896	0.7283
	Error	168	7735.35	46.04					Error	24	1325.08	55.212					7	0.025641	0.025641	-0.027279	0.0785614	0.3273
dx	Line	1	231.01	231.01	5.3469	0.0217			Line	1	12.0043	12.0043	0.2718	0.6069		CG13369	1	-4.34615	3.27291	-11.1011	2.4088	0.1967
	Week	8	26910.7	3363.83	77.8589	<.0001			Error	24	1059.83	44.1595					2	-4.64103	2.24526	-9.27501	-0.007045	0.0497
	Line*Week	8	397.062	49.633	1.1488	0.3319			Line	1	14.8761	14.8761	0.6674	0.422			3	-3.9359	3.28998	-10.7261	2.8543	0.2433
	Error	216	9332.11	43.2					Error	24	534.957	22.2899					4	1.48718	3.49986	-5.73617	8.71053	0.6747
egh	Line	1	74.462	74.462	1.2481	0.2652			Line	1	10.6838	10.6838	1.9734	0.1729			5	5.03846	3.14004	-1.44225	11.5192	0.1217
	Week	8	28798.8	3599.84	60.3394	<.0001			Error	24	129.932	5.4138					6	6.65385	3.13638	0.18068	13.127	0.0444
	Line*Week	8	686.528	85.816	1.4384	0.1818		CG3704	Line	1	1047.12	1047.12	37.304	<.0001			7	-0.25641	1.77795	-3.92592	3.4131	0.8865
	Error	216	12886.6	59.66					Error	24	673.675	28.07					8	0.0384615	0.300394	-0.581522	0.658445	0.8992
Eip75B	Line	1	956.107	956.107	13.837	0.0002			Line	1	240.038	240.038	3.9863	0.0573		CG13760	1	-10.141	2.4134	-15.122	-5.16001	0.0003
	Week	9	55562	6173.56	89.3455	<.0001			Error	24	1445.18	60.216					2	0.371795	3.76774	-7.40444	8.14803	0.9222
	Line*Week	9	3045.92	338.436	4.8979	<.0001			Line	1	235.001	235.001	3.4997	0.0736			3	-0.692308	4.03389	-9.01786	7.63324	0.8652
	Error	240	16583.4	69.1					Error	24	1611.59	67.149					4	-3.34615	4.56109	-12.7598	6.06748	0.4703
Fdx1	Line	1	46.222	46.222	2.2099	0.1384			Line	1	374.427	374.427	3.2472	0.0841			5	-0.666667	2.40053	-5.62112	4.28779	0.7836
	Week	9	38499.7	4277.74	204.522	<.0001			Error	24	2767.35	115.306					6	0.435897	2.10715	-3.91304	4.78483	0.8379
	Line*Week	9	278.841	30.982	1.4813	0.1554			Line	1	167.538	167.538	1.0095	0.325			7	0.051282	0.0347181	-0.020373	0.122937	0.1527
	Error	240	5019.8	20.92					Error	24	3982.89	165.954				CG13933	1	-9.85897	2.651	-15.3304	-4.38759	0.0011
fs(1)N	Line	1	483.899	483.899	9.5942	0.0022			Line	1	46.2222	46.2222	0.2701	0.608			2	-4.78205	3.17558	-11.3361	1.77203	0.1451
	Week	8	24496.6	3062.07	60.7112	<.0001			Error	24	4106.76	171.115					3	-5.4359	3.78678	-13.2514	2.37963	0.1641
	Line*Week	8	1165.18	145.648	2.8877	0.0045			Line	1	76.1635	76.1635	1.2895	0.2674			4	-5.29487	4.45603	-14.4917	3.90192	0.2464
	Error	216	10894.3	50.44					Error	24	1417.59	59.0661					5	0.358974	2.35339	-4.49819	5.21614	0.88
G9a	Line	1	331.463	331.463	7.1088	0.0083			Line	1	0.0042735	0.0042735	1	0.3273			6	-1	1.41359	-3.91751	1.91751	0.4861
	Week	8	29920.2	3740.03	80.2112	<.0001			Error	24	0.102564	0.004273				CG14969	1	-2.66667	1.70399	-6.18352	0.85019	0.1307
	Line*Week	8	396.281	49.535	1.0624	0.3907		CG4281	Line	1	338.642	338.642	15.2343	0.0007			2	-4.14103	2.63142	-9.57202	1.28997	0.1287
	Error	216	10071.5	46.63					Error	24	533.496	22.229					3	-4.16667	2.75224	-9.84701	1.51367	0.1431
Hsl	Line	1	422.693	422.693	10.8895	0.0011			Line	1	36.5652	36.5652	0.5838	0.4523			4	-1.60256	1.7874	-5.29158	2.08645	0.3788
	Week	8	26556.9	3319.61	85.5208	<.0001			Error	24	1503.15	62.6314					5	-3.46154	1.48968	-6.53609	-0.386985	0.0289
	Line*Week	8	683.768	85.471	2.2019	0.0284			Line	1	0.00427352	0.0042735	0	0.9945			6	-4.64103	1.38078	-7.49082	-1.79123	0.0026
	Error	216	8384.35	38.82					Error	24	2083.15	86.7977					7	-1.07692	0.557139	-2.2268	0.0729562	0.0651
Hsp22	Line	1	218.273	218.273	2.8238	0.0943			Line	1	78.4626	78.4626	0.5457	0.4673			8	-0.076923	0.0769231	-0.235685	0.0818384	0.3273
	Week	8	32975.4	4121.93	53.3257	<.0001			Error	24	3451.1	143.796				CG16868	1	-5.20513	1.82009	-8.96161	-1.44864	0.0086
	Line*Week	8	823.667	102.958	1.332	0.2289			Line	1	344.684	344.684	6.8321	0.0152			2	1.51282	1.88319	-2.37389	5.39953	0.4297
	Error	216	16696.2	77.3					Error	24	1210.82	50.451					3	2.17949	5.09659	-8.33936	12.6983	0.6727
Klp67A	Line	1	409.36	409.36	10.0549	0.0017			Line	1	33.8504	33.8504	1.3963	0.2489			4	1.35897	7.43004	-13.9759	16.6938	0.8564
	Week	8	29480.6	3685.07	90.5148	<.0001			Error	24	581.829	24.2429					5	-1.05128	5.36986	-12.1341	10.0316	0.8464
	Line*Week	8	639.19	79.899	1.9625	0.0524			Line	1	0.209402	0.209402	1	0.3273			6	-0.807692	2.70101	-6.38231	4.76693	0.7675
	Error	216	8793.87	40.71					Error	24	5.02564	0.209402					7	-0.423077	1.65587	-3.84062	2.99446	0.8005
l(1)G0004	Line	1	151.043	151.043	7.4284	0.0069			Line	1	0.017094	0.017094	1	0.3273			8	-0.128205	0.134463	-0.405722	0.149312	0.3499
	Week	9	36388.5	4043.17	198.847	<.0001			Error	24	0.410257	0.017094				CG17777	1	-1.98718	3.33984	-8.88027	4.90591	0.5574
	Line*Week	9	198.07	22.008	1.0824	0.3764		CG4452	Line	1	0.0683761	0.0683761	0.0007	0.9786			2	-9.16667	2.92608	-15.2058	-3.12754	0.0045
	Error	240	4879.93	20.33					Error	24	2243.73	93.4886					3	-3.23077	3.55862	-10.5754	4.11386	0.373
lama	Line	1	125.693	125.693	2.9161	0.0891			Line	1	2076.11	2076.11	14.353	0.0009			4	-8.41026	4.78959	-18.2955	1.47498	0.0919
	Week	8	26417.6	3302.2	76.6104	<.0001			Error	24	3471.5	144.65					5	-1.80769	4.50288	-11.1012	7.48579	0.6916
	Line*Week	8	443.622	55.453	1.2865	0.2518			Line	1	11.1154	11.1154	0.1689	0.6847			6	-6.02564	1.88672	-9.91964	-2.13164	0.0039
	Error	216	9310.42	43.1					Error	24	1579.32	65.8048					7	-1.57692	1.61988	-4.92019	1.76635	0.34
Lztr1	Line	1	12.927	12.927	0.1721	0.6786			Line	1	14.3761	14.3761	0.2507	0.6211			8	-0.192308	0.192308	-0.589211	0.204596	0.3273
	Week	8	32779.6	4097.45	54.5563	<.0001			Error	24	1376.24	57.3433				CG18273	1	3.05128	3.56792	-4.31254	10.4151	0.4009
	Line*Week	8	844.755	105.594	1.406	0.1952			Line	1	0.346154	0.346154	0.009	0.9254			2	-1.46154	4.46532	-10.6775	7.75442	0.7463
	Error	216	16222.7	75.1					Error	24	926.991	38.6246					3	-3.25641	3.30924	-10.0863	3.57352	0.3349
MED22	Line	1	384.615	384.615	6.2322	0.0132			Line	1	11.1154	11.1154	0.4762	0.4968			4	-4.15385	5.38593	-15.2699	6.96217	0.4481
	Week	9	51478.8	5719.87	92.6829	<.0001			Error	24	560.222	23.3426					5	-2.44872	4.17734	-11.0703	6.17288	0.5632
	Line*Week	9	1704.33	189.37	3.0685	0.0017			Line	1	0.722222	0.722222	0.5414	0.469			6	-3.83333	2.8004	-9.61308	1.94642	0.1837
	Error	240	14811.5	61.71					Error	24	32.0171	1.33405					7	-1.23077	1.67753	-4.69302	2.23148	0.4703
msn	Line	1	143.115	143.115	2.2905	0.1315		CG4554	Line	1	631.796	631.796	31.7441	<.0001			8	-0.192308	0.192308	-0.589211	0.204596	0.3273
	Week	9	56143.9	6238.21	99.8389	<.0001			Error	24	477.667	19.903				CG32809	1	-7.80769	2.02576	-11.9887	-3.62672	0.0008
	Line*Week	9	1158.06	128.674	2.0593	0.0339			Line	1	380.779	380.779	6.974	0.0143			2	-11.859	2.98894	-18.0278	-5.69011	0.0006
	Error	240	14995.9	62.48					Error	24	1310.4	54.6					3	-7.05128	3.63487	-14.5533	0.450713	0.0642
ND-ACP	Line	1	2556.85	2556.85	93.9445	<.0001			Line	1	31.6068	31.6068	0.3958	0.5352			4	8.44872	5.27119	-2.43047	19.3279	0.1221
	Week	8	9136.17	1142.02	41.9605	<.0001			Error	24	1916.32	79.8469					5	11.2564	3.69526	3.62977	18.8831	0.0056
	Line*Week	8	7684.71	960.589	35.2943	<.0001			Line	1	204.027	204.027	1.6255	0.2145			6	4.10256	2.596	-1.25531	9.46044	0.1271
	Error	216	5878.78	27.22					Error	24	3012.42	125.517					7	1.30769	0.738117	-0.215707	2.83109	0.0891
Nmd3	Line	1	0.154	0.154	0.002	0.9641			Line	1	273.543	273.543	4.9458	0.0358			8	0.589744	0.536627	-0.5178	1.69729	0.2827
	Week	9	52185.9	5798.44	76.5089	<.0001			Error	24	1327.4	55.308				crn	1	-21.7179	1.37237	-24.5504	-18.8855	<.0001
	Line*Week	9	963.083	107.009	1.412	0.1835			Line	1	20.3462	20.3462	0.6192	0.4391			2	-29.1538	0.998629	-31.2149	-27.0928	<.0001
	Error	240	18189.1	75.79					Error	24	788.65	32.8604					3	-25.0128	3.41739	-32.066	-17.9597	<.0001
pcx	Line	1	1.885	1.885	0.1062	0.7448		CG5254	Line	1	10.2607	10.2607	0.5143	0.4802			4	-24.6154	4.7279	-34.3733	-14.8575	<.0001
	Week	9	39969.2	4441.02	250.207	<.0001			Error	24	478.838	19.9516					5	-16.6282	3.7287	-24.3239	-8.93255	0.0002
	Line*Week	9	71.214	7.913	0.4458	0.909			Line	1	318.5	318.5	6.4103	0.0183			6	-8.03846	1.69801	-11.543	-4.53394	<.0001
	Error	240	4259.85	17.75					Error	24	1192.46	49.686					7	-3.61538	1.07407	-5.83216	-1.39861	0.0026
Pgant1	Line	1	0.154	0.154	0.0026	0.9596			Line	1	223.129	223.129	2.5162	0.1258			8	-0.205128	0.110286	-0.432748	0.0224914	0.0752
	Week	8	28889.4	3611.17	60.4976	<.0001			Error	24	2128.23	88.676				CycE	1	2.10256	2.1828	-2.40252	6.60765	0.345
	Line*Week	8	222.165	27.771	0.4652	0.8797			Line	1	339.846	339.846	11.7428	0.0022			2	-1.05128	2.89806	-7.03259	4.93003	0.72
	Error	216	12893.3	59.69					Error	24	694.581	28.941					3	-1.69231	3.33053	-8.56619	5.18158	0.616
piwi	Line	1	94.876	94.876	1.4235	0.234			Line	1	187.565	187.565	17.7964	0.0003			4	-6.65385	4.13612	-15.1904	1.88269	0.1208
	Week	9	62678.3	6964.26	104.491	<.0001			Error	24	252.949	10.54					5	-10.0769	4.97118	-20.3369	0.183083	0.0539
	Line*Week	9	1331.14	147.904	2.2191	0.0215			Line	1	144.684	144.684	11.7053	0.0022			6	-10.3462	3.65392	-17.8875	-2.80483	0.0092
	Error	240	15995.8	66.65					Error	24	296.654	12.361					7	-5.15385	2.30466	-9.91043	-0.397267	0.0349
pn	Line	1	27.35	27.35	0.895	0.3451			Line	1	7.53846	7.53846	3.7363	0.0651			8	-0.025641	0.025641	-0.078561	0.0272794	0.3273
	Week	9	38075.3	4230.59	138.435	<.0001			Error	24	48.4231	2.01763				Cyp4g1	1	-36.6026	2.65264	-42.0774	-31.1278	<.0001
	Line*Week	9	325.244	36.138	1.1825	0.3068			Line	1	0.0384615	0.0384615	1	0.3273			2	-28.1026	1.84997	-31.9207	-24.2844	<.0001
	Error	240	7334.45	30.56					Error	24	0.923077	0.038462					3	-1.64103	4.25948	-10.4322	7.15011	0.7034
RpL22	Line	1	3780.09	3780.09	140.519	<.0001		CG7970	Line	1	294.471	294.471	9.2796	0.0056			4	-21.6923	3.19951	-28.2958	-15.0888	<.0001
	Week	8	8304.5	1038.06	38.5884	<.0001			Error	24	761.598	31.733					5	-12.0513	2.35074	-16.903	-7.1996	<.0001
	Line*Week	8	8304.5	1038.06	38.5884	<.0001			Line	1	171.796	171.796	2.785	0.1081			6	-6.0641	1.88633	-9.9573	-2.17091	0.0037
	Error	216	5810.59	26.9					Error	24	1480.45	61.686					7	-2.69231	1.38506	-5.55093	0.166317	0.0637
sgg	Line	1	15.902	15.902	0.2811	0.5965			Line	1	0.273505	0.273504	0.0026	0.9599			8	-0.192308	0.192308	-0.589211	0.204596	0.3273
	Week	9	58122.6	6458.07	114.166	<.0001			Error	24	2543.66	105.986				DAAM	1	-7.88462	1.88136	-11.7675	-4.00169	0.0003
	Line*Week	9	1335.05	148.339	2.6224	0.0066			Line	1	192.975	192.975	1.0799	0.3091			2	-5.69231	3.41492	-12.7404	1.35574	0.1085
	Error	240	13576.1	56.57					Error	24	4288.74	178.698					3	-2.9359	3.55441	-10.2718	4.40005	0.4169
sov	Line	1	405.402	405.402	6.7925	0.0097			Line	1	206.838	206.838	2.5118	0.1261			4	6.79487	4.60684	-2.71318	16.3029	0.1532
	Week	9	65767.1	7307.45	122.436	<.0001			Error	24	1976.34	82.348					5	8.78205	3.54191	1.4719	16.0922	0.0206
	Line*Week	9	2329.61	258.845	4.3369	<.0001			Line	1	12.4615	12.4615	1.0034	0.3265			6	4.37179	2.36241	-0.503978	9.24757	0.0766
	Error	240	14324.2	59.68					Error	24	298.051	12.4188					7	0.512821	0.387878	-0.28772	1.31336	0.1986
sra	Line	1	10.684	10.684	0.1944	0.6597		CG7971	Line	1	2049.39	2049.39	102.955	<.0001		dnc	1	0.435897	1.70209	-3.07704	3.94884	0.8001
	Week	9	65066.5	7229.61	131.528	<.0001			Error	24	477.735	19.91					2	5.64103	3.68863	-1.97194	13.254	0.1393
	Line*Week	9	1973.97	219.33	3.9903	<.0001			Line	1	2103	2103	40.5303	<.0001			3	5.01282	4.21622	-3.68904	13.7147	0.2461
	Error	240	13191.9	54.97					Error	24	1245.29	51.89					4	4.76923	4.04092	-3.57081	13.1093	0.2495
TRAM	Line	1	53.607	53.607	1.9088	0.1684			Line	1	1690.77	1690.77	24.7428	<.0001			5	-5.67949	5.09089	-16.1866	4.8276	0.2756
	Week	9	39897.2	4433.02	157.849	<.0001			Error	24	1640.02	68.33					6	-3.80769	4.25826	-12.5963	4.98093	0.3801
	Line*Week	9	222.248	24.694	0.8793	0.5444			Line	1	986.668	986.668	11.2285	0.0027			7	1.24359	3.76039	-6.51747	9.00465	0.7437
	Error	240	6740.17	28.08					Error	24	2108.91	87.871					8	2.24359	1.99585	-1.87563	6.36281	0.2721
wds	Line	1	228.038	228.038	5.5213	0.0199			Line	1	84.9615	84.9615	4.1925	0.0517		Dredd	1	-6.38462	3.43657	-13.4773	0.70811	0.0755
	Week	6	27286.5	4547.75	110.111	<.0001			Error	24	486.359	20.265					2	-11.6154	3.59388	-19.0328	-4.19799	0.0036
	Line*Week	6	1861.69	310.281	7.5126	<.0001			Line	1	10.2607	10.2607	0.8196	0.3743			3	-9.4359	3.62916	-16.9261	-1.94567	0.0157
	Error	168	6938.65	41.3					Error	24	300.444	12.5185					4	-3.76923	2.30001	-8.51622	0.977759	0.1143
zf30c	Line	1	160.838	160.838	5.4687	0.0202			Line	1	0.0042735	0.0042735	1	0.3273			5	-5.66667	1.8078	-9.39778	-1.93555	0.0045
	Week	9	53305.6	5922.85	201.386	<.0001			Error	24	0.102564	0.004273					6	-3.17949	1.69603	-6.67991	0.32094	0.0731
	Line*Week	9	1604.21	178.246	6.0606	<.0001		CG12018	Line	1	278.975	278.975	13.7909	0.0011			7	0.589743	0.504092	-0.450652	1.63014	0.2535
	Error	240	7058.49	29.41					Error	24	485.496	20.229				dx	1	-5.96154	1.81869	-9.71513	-2.20794	0.0032
									Line	1	52.1806	52.1805	0.8389	0.3688			2	-5.91026	3.55395	-13.2452	1.42474	0.1093
									Error	24	1492.85	62.2019					3	-4.97436	3.74437	-12.7023	2.75363	0.1965
									Line	1	54.5684	54.5684	0.641	0.4312			4	-0.192308	4.75151	-9.99895	9.61433	0.9681
									Error	24	2042.99	85.1246					5	-0.74359	2.20553	-5.29557	3.80839	0.7389
									Line	1	40.625	40.625	0.2958	0.5916			6	0.102564	1.55613	-3.10913	3.31426	0.948
									Error	24	3296.56	137.356				egh	1	-3.38462	2.12003	-7.76014	0.990909	0.1235
									Line	1	14.3761	14.3761	0.2689	0.6088			2	-7.07692	2.15169	-11.5178	-2.63605	0.0031
									Error	24	1283.18	53.4658					3	6.10256	4.42243	-3.02488	15.23	0.1803
									Line	1	2.06838	2.06838	0.1235	0.7283			4	0.730769	5.20666	-10.0152	11.4768	0.8896
									Error	24	401.983	16.7493					5	-0.525641	4.45189	-9.71389	8.66261	0.907
									Line	1	0.0042735	0.0042735	1	0.3273			6	-2.9359	2.38307	-7.85431	1.98252	0.2299
									Error	24	0.102564	0.004273					7	-3.03846	1.14199	-5.3954	-0.681519	0.0137
								CG13369	Line	1	122.779	122.779	1.7634	0.1967			8	-0.205128	0.110286	-0.432748	0.0224914	0.0752
									Error	24	1671.06	69.628				Eip75B	1	12.1282	2.5653	6.83369	17.4227	<.0001
									Line	1	140.004	140.004	4.2726	0.0497			2	5.12821	4.06429	-3.26007	13.5165	0.2192
									Error	24	786.423	32.768					3	2.32051	3.95402	-5.84018	10.4812	0.5628
									Line	1	100.693	100.693	1.4312	0.2433			4	-7.23077	5.01702	-17.5854	3.12386	0.1624
									Error	24	1688.54	70.356					5	-12.0385	4.87688	-22.1038	-1.97308	0.0211
									Line	1	14.3761	14.3761	0.1806	0.6747			6	-9.69231	3.55824	-17.0361	-2.34847	0.0118
									Error	24	1910.85	79.6186					7	-4.10256	2.43985	-9.13817	0.933045	0.1056
									Line	1	165.01	165.01	2.5747	0.1217			8	-0.025641	0.025641	-0.078561	0.0272794	0.3273
									Error	24	1538.13	64.089					9	0.0384615	0.0384615	-0.040919	0.117842	0.3273
									Line	1	287.779	287.779	4.5008	0.0444		Fdx1	1	-2.66667	1.60453	-5.97825	0.644918	0.1095
									Error	24	1534.55	63.94					2	-0.74359	2.97211	-6.87773	5.39055	0.8046
									Line	1	0.42735	0.42735	0.0208	0.8865			3	-6.32051	2.65917	-11.8088	-0.832251	0.0258
									Error	24	493.132	20.5472					4	-2.84615	3.12785	-9.30173	3.60942	0.3719
									Line	1	0.00961538	0.0096154	0.0164	0.8992			5	-3.52564	1.30105	-6.21087	-0.840416	0.0122
									Error	24	14.0769	0.586538					6	-4.64103	1.38078	-7.49082	-1.79123	0.0026
								CG13760	Line	1	668.463	668.463	17.6565	0.0003			7	-1.07692	0.557139	-2.2268	0.0729562	0.0651
									Error	24	908.624	37.859					8	-0.076923	0.0769231	-0.235685	0.0818384	0.3273
									Line	1	0.898505	0.898505	0.0097	0.9222		fs(1)N	1	-8.62821	1.73409	-12.2072	-5.04922	<.0001
									Error	24	2214.56	92.2731					2	-8.39744	3.25074	-15.1066	-1.68823	0.0163
									Line	1	3.11539	3.11538	0.0295	0.8652			3	-4.02564	4.27494	-12.8487	4.79741	0.3557
									Error	24	2538.48	105.77					4	1.5	5.13042	-9.08867	12.0887	0.7725
									Line	1	72.7788	72.7788	0.5382	0.4703			5	5.79487	3.01752	-0.432979	12.0227	0.0668
									Error	24	3245.36	135.223					6	-0.435897	1.46487	-3.45924	2.58745	0.7686
									Line	1	2.88889	2.88889	0.0771	0.7836			7	0.897436	0.606687	-0.354705	2.14958	0.1521
									Error	24	898.957	37.4566					8	0.282051	0.21299	-0.157539	0.721642	0.1979
									Line	1	1.23504	1.23504	0.0428	0.8379		G9a	1	-7.14103	1.66059	-10.5683	-3.71374	0.0002
									Error	24	692.65	28.8604					2	-0.679487	3.14852	-7.17771	5.81873	0.831
									Line	1	0.017094	0.017094	2.1818	0.1527			3	1.23077	3.96772	-6.95821	9.41975	0.7591
									Error	24	0.188034	0.007835					4	-0.935897	4.83692	-10.9188	9.04703	0.8482
								CG13933	Line	1	631.796	631.796	13.8307	0.0011			5	1.66667	2.67661	-3.85759	7.19092	0.5394
									Error	24	1096.33	45.681					6	1.92308	2.22836	-2.67603	6.52219	0.3967
									Line	1	148.642	148.642	2.2677	0.1451			7	1.1282	0.76473	-0.450121	2.70653	0.1531
									Error	24	1573.15	65.548					8	0.282051	0.19188	-0.113969	0.678072	0.1546
									Line	1	192.068	192.068	2.0606	0.1641		Hsl	1	-8.0641	2.01037	-12.2133	-3.9149	0.0005
									Error	24	2236.99	93.208					2	-6.75641	2.97623	-12.899	-0.613778	0.0325
									Line	1	182.232	182.232	1.4119	0.2464			3	0.641026	3.56106	-6.70864	7.99069	0.8587
									Error	24	3097.56	129.065					4	-2.91026	4.21327	-11.606	5.78551	0.4964
									Line	1	0.837607	0.837607	0.0233	0.88			5	2.10256	2.56805	-3.19764	7.40276	0.421
									Error	24	864	36					6	0.692308	1.86584	-3.1586	4.54322	0.7139
									Line	1	6.5	6.5	0.5004	0.4861			7	0.820513	0.57564	-0.367549	2.00857	0.1669
									Error	24	311.726	12.9886				Hsp22	1	-5.79487	1.88664	-9.68869	-1.90105	0.0052
								CG14969	Line	1	46.2222	46.2222	2.4491	0.1307			2	5.12821	4.84913	-4.8799	15.1363	0.3008
									Error	24	452.957	18.8732					3	2.55128	3.80149	-5.29461	10.3972	0.5085
									Line	1	111.463	111.463	2.4765	0.1287			4	4.32051	5.96753	-7.99587	16.6369	0.4761
									Error	24	1080.21	45.009					5	-5.01282	4.88108	-15.0869	5.06124	0.3147
									Line	1	112.847	112.847	2.292	0.1431			6	-3.28205	2.18588	-7.79348	1.22937	0.1463
									Error	24	1181.67	49.236					7	-2.96154	1.1291	-5.29189	-0.631184	0.0149
									Line	1	16.6934	16.6934	0.8039	0.3788			8	-0.179487	0.113228	-0.413178	0.0542033	0.126
									Error	24	498.389	20.7662				Klp67A	1	-7.9359	1.80809	-11.6676	-4.20419	0.0002
									Line	1	77.8846	77.8846	5.3995	0.0289			2	-2.65385	3.05827	-8.9658	3.65811	0.3941
									Error	24	346.188	14.4245					3	-0.948718	3.93468	-9.0695	7.17206	0.8115
									Line	1	140.004	140.004	11.2974	0.0026			4	4.42308	4.12218	-4.08469	12.9308	0.2939
									Error	24	297.423	12.393					5	3.1282	3.02365	-3.1123	9.36871	0.3112
									Line	1	7.53846	7.53846	3.7363	0.0651			6	-0.74359	1.46023	-3.75735	2.27017	0.6152
									Error	24	48.4231	2.01763				l(1)G0004	1	-4.82051	1.74733	-8.42681	-1.21421	0.0109
									Line	1	0.0384615	0.0384615	1	0.3273			2	-4.14103	2.74314	-9.80259	1.52054	0.1442
									Error	24	0.923077	0.038462					3	-2.69231	3.13889	-9.17065	3.78604	0.3995
								CG16868	Line	1	176.107	176.107	8.1786	0.0086			4	-3.48718	2.21859	-8.06611	1.09175	0.1291
									Error	24	516.786	21.533					5	-2.14103	1.72347	-5.69808	1.41603	0.2261
									Line	1	14.8761	14.8761	0.6453	0.4297			6	-3.33333	1.57903	-6.5923	-0.074371	0.0454
									Error	24	553.239	23.0516					7	-0.615385	0.677731	-2.01415	0.783384	0.3729
									Line	1	30.8761	30.8761	0.1829	0.6727			8	-0.076923	0.0769231	-0.235685	0.0818384	0.3273
									Error	24	4052.14	168.839				lama	1	-4.39744	1.75663	-8.02294	-0.771933	0.0195
									Line	1	12.0043	12.0043	0.0335	0.8564			2	-5.75641	2.9435	-11.8315	0.318678	0.0622
									Error	24	8612.07	358.836					3	-4.35897	4.10235	-12.8258	4.10786	0.2986
									Line	1	7.18376	7.18376	0.0383	0.8464			4	-4.21795	4.48031	-13.4648	5.02895	0.3559
									Error	24	4498.32	187.43					5	1.38461	2.58161	-3.94356	6.71279	0.5967
									Line	1	4.24039	4.24038	0.0894	0.7675			6	1.20513	1.98923	-2.90045	5.3107	0.5503
									Error	24	1138.09	47.4206					7	1	0.638285	-0.317355	2.31736	0.1303
									Line	1	1.16346	1.16346	0.0653	0.8005			8	0.025641	0.025641	-0.027279	0.0785614	0.3273
									Error	24	427.735	17.8223				Lztr1	1	-1.41026	1.62691	-4.76803	1.94752	0.3946
									Line	1	0.106838	0.106838	0.9091	0.3499			2	6.51282	3.42987	-0.56608	13.5917	0.0697
									Error	24	2.82051	0.117521					3	7.58974	5.38426	-3.52282	18.7023	0.1715
								CG17777	Line	1	25.6677	25.6677	0.354	0.5574			4	-2.35897	5.80392	-14.3377	9.61974	0.688
									Error	24	1740.11	72.5045					5	-3.17949	4.44107	-12.3454	5.98644	0.4809
									Line	1	546.181	546.181	9.8141	0.0045			6	-3.71795	1.95785	-7.75876	0.322865	0.0697
									Error	24	1335.66	55.653					7	0.923077	1.75082	-2.69043	4.53659	0.6029
									Line	1	67.8462	67.8461	0.8242	0.373			8	0.807692	0.526578	-0.279112	1.8945	0.1381
									Error	24	1975.55	82.3145					9	0.0769231	0.0769231	-0.081838	0.235684	0.3273
									Line	1	459.761	459.761	3.0833	0.0919		MED22	1	7.69231	2.6093	2.30697	13.0776	0.007
									Error	24	3578.67	149.111					2	-0.25641	3.16843	-6.79572	6.2829	0.9362
									Line	1	21.2404	21.2404	0.1612	0.6916			3	-0.961539	3.5324	-8.25205	6.32897	0.7878
									Error	24	3163.04	131.793					4	1.1282	4.37939	-7.91042	10.1668	0.7989
									Line	1	236.004	236.004	10.1998	0.0039			5	-10.1154	5.07034	-20.58	0.34928	0.0575
									Error	24	555.316	23.138					6	-10.7308	3.45429	-17.8601	-3.60146	0.0048
									Line	1	16.1635	16.1635	0.9477	0.34			7	-3.21795	2.96619	-9.33987	2.90397	0.2888
									Error	24	409.346	17.0561					8	0.0128205	0.046225	-0.082583	0.108224	0.7839
									Line	1	0.240385	0.240385	1	0.3273		msn	1	4.69231	1.77853	1.02161	8.36301	0.0144
									Error	24	5.76923	0.240385					2	0.935897	3.02793	-5.31344	7.18523	0.7599
								CG18273	Line	1	60.5171	60.5171	0.7314	0.4009			3	5.65385	3.06639	-0.674882	11.9826	0.0776
									Error	24	1985.89	82.7454					4	4.61538	4.34783	-4.3581	13.5889	0.299
									Line	1	13.8846	13.8846	0.1071	0.7463			5	-6.14103	5.75901	-18.027	5.74498	0.2969
									Error	24	3110.49	129.604					6	-6.82051	3.93539	-14.9428	1.30173	0.0959
									Line	1	68.9273	68.9274	0.9683	0.3349			7	-4.21795	2.60366	-9.59165	1.15575	0.1183
									Error	24	1708.36	71.1818					8	0.282051	0.238475	-0.210138	0.77424	0.2485
									Line	1	112.154	112.154	0.5948	0.4481		ND-ACP	1	-19.8333	1.592	-23.1191	-16.5476	<.0001
									Error	24	4525.29	188.554					2	-32.2436	2.71055	-37.8379	-26.6493	<.0001
									Line	1	38.9754	38.9754	0.3436	0.5632			3	-22.8205	3.12686	-29.274	-16.367	<.0001
									Error	24	2722.22	113.426					4	-14.8333	3.6163	-22.297	-7.36965	0.0004
									Line	1	95.5139	95.5139	1.8738	0.1837			5	-4.25641	1.74359	-7.855	-0.657818	0.0224
									Error	24	1223.39	50.9747					6	-1.4359	1.38129	-4.28673	1.41494	0.3089
									Line	1	9.84615	9.84615	0.5383	0.4703		Nmd3	1	0.153846	1.93209	-3.83379	4.14148	0.9372
									Error	24	439	18.2917					2	-5.53846	4.64018	-15.1153	4.0384	0.2443
									Line	1	0.240385	0.240385	1	0.3273			3	5.65385	4.26128	-3.141	14.4487	0.1971
									Error	24	5.76923	0.240385					4	3.1282	5.01021	-7.21235	13.4688	0.5383
								CG32809	Line	1	396.24	396.24	14.8548	0.0008			5	-2.33333	5.13902	-12.9397	8.27308	0.6539
									Error	24	640.179	26.674					6	-8	3.95094	-16.1543	0.154341	0.0541
									Line	1	914.129	914.129	15.742	0.0006			7	-4.35897	2.45969	-9.43553	0.717577	0.0891
									Error	24	1393.67	58.069					8	0.0128205	0.046225	-0.082583	0.108224	0.7839
									Line	1	323.184	323.184	3.7632	0.0642		pcx	1	0.538462	1.38418	-2.31835	3.39527	0.7007
									Error	24	2061.11	85.88					2	-2.51282	2.67972	-8.0435	3.01785	0.3577
									Line	1	463.975	463.975	2.569	0.1221			3	0.935898	2.95489	-5.16269	7.03449	0.7542
									Error	24	4334.52	180.605					4	0.384615	1.91483	-3.56739	4.33662	0.8425
									Line	1	823.594	823.594	9.2792	0.0056			5	0.448718	1.4913	-2.62917	3.52661	0.7661
									Error	24	2130.17	88.757					6	-1.67949	1.71132	-5.21147	1.8525	0.3362
									Line	1	109.402	109.402	2.4975	0.1271			7	-0.641026	0.600378	-1.88014	0.598093	0.2963
									Error	24	1051.32	43.805					8	-2.78e-17	0.0947909	-0.195639	0.195639	1
									Line	1	11.1154	11.1154	3.1388	0.0891			9	0.538462	0.538462	-0.572868	1.64979	0.3273
									Error	24	84.9915	3.5413				Pgant1	1	-0.153846	1.81768	-3.90536	3.59767	0.9333
									Line	1	2.26068	2.26068	1.2078	0.2827			2	-3.23077	1.87989	-7.11068	0.649138	0.0986
									Error	24	44.9231	1.87179					3	4.15385	4.48932	-5.11166	13.4193	0.364
								crn	Line	1	3065.85	3065.85	250.434	<.0001			4	-0.846154	5.46254	-12.1203	10.428	0.8782
									Error	24	293.812	12.24					5	-1.82051	4.05785	-10.1955	6.55448	0.6577
									Line	1	5524.65	5524.65	852.282	<.0001			6	-1.82051	2.74644	-7.48888	3.84786	0.5137
									Error	24	155.573	6.48					7	-1.55128	1.34038	-4.3177	1.21513	0.2585
									Line	1	4066.67	4066.67	53.5717	<.0001			8	-0.205128	0.110286	-0.432748	0.0224914	0.0752
									Error	24	1821.86	75.91				piwi	1	3.82051	1.85267	-0.003213	7.64424	0.0502
									Line	1	3938.46	3938.46	27.1067	<.0001			2	7.89744	3.08296	1.53452	14.2604	0.0171
									Error	24	3487.08	145.29					3	7.70513	3.97037	-0.489305	15.8996	0.0641
									Line	1	1797.23	1797.23	19.8873	0.0002			4	6.05128	4.51414	-3.26545	15.368	0.1926
									Error	24	2168.9	90.37					5	-2.76923	5.0617	-13.2161	7.67759	0.5894
									Line	1	420.01	420.01	22.4112	<.0001			6	-5.39744	4.48793	-14.6601	3.8652	0.2408
									Error	24	449.786	18.741					7	-3.67949	2.77421	-9.40517	2.04619	0.1972
									Line	1	84.9615	84.9615	11.3304	0.0026			8	-0.025641	0.025641	-0.078561	0.0272794	0.3273
									Error	24	179.966	7.4986				pn	1	2.05128	1.34804	-0.730946	4.83351	0.1412
									Line	1	0.273504	0.273504	3.4595	0.0752			2	-6.32051	3.38241	-13.3015	0.660445	0.0739
									Error	24	1.89744	0.07906					3	-1.07692	4.00673	-9.34641	7.19257	0.7904
								CycE	Line	1	28.735	28.735	0.9278	0.345			4	-2.67949	3.00522	-8.88195	3.52298	0.3815
									Error	24	743.282	30.9701					5	-0.794872	2.39244	-5.73263	4.14289	0.7426
									Line	1	7.18376	7.18376	0.1316	0.72			6	-3.83333	1.61516	-7.16685	-0.499816	0.026
									Error	24	1310.21	54.5921					7	-0.923077	0.57799	-2.11599	0.269837	0.1233
									Line	1	18.6154	18.6154	0.2582	0.616			8	-0.076923	0.0769231	-0.235685	0.0818384	0.3273
									Error	24	1730.42	72.101				RpL22	1	-24.1154	1.44823	-27.1044	-21.1264	<.0001
									Line	1	287.779	287.779	2.588	0.1208			2	-32.2436	2.71055	-37.8379	-26.6493	<.0001
									Error	24	2668.77	111.199					3	-22.8205	3.12686	-29.274	-16.367	<.0001
									Line	1	660.038	660.038	4.109	0.0539			4	-14.8333	3.6163	-22.297	-7.36965	0.0004
									Error	24	3855.17	160.632					5	-4.25641	1.74359	-7.855	-0.657818	0.0224
									Line	1	695.779	695.779	8.0175	0.0092			6	-1.4359	1.38129	-4.28673	1.41494	0.3089
									Error	24	2082.78	86.782				sgg	1	1.5641	1.89075	-2.33822	5.46643	0.4163
									Line	1	172.654	172.654	5.0009	0.0349			2	0.576923	2.45684	-4.49375	5.6476	0.8163
									Error	24	828.586	34.524					3	8.96154	3.3993	1.94572	15.9773	0.0145
									Line	1	0.0042735	0.0042735	1	0.3273			4	6.9359	4.14025	-1.60916	15.481	0.1069
									Error	24	0.102564	0.004273					5	-3.5	5.04795	-13.9185	6.91846	0.4947
								Cyp4g1	Line	1	8708.36	8708.36	190.399	<.0001			6	-7.60256	3.99506	-15.848	0.642826	0.0691
									Error	24	1097.7	45.74					7	-2.51282	2.6843	-8.05295	3.02731	0.3585
									Line	1	5133.4	5133.4	230.761	<.0001			8	0.397436	0.265852	-0.151255	0.946127	0.148
									Error	24	533.893	22.25				sov	1	7.89744	2.03307	3.7014	12.0935	0.0007
									Line	1	17.5043	17.5043	0.1484	0.7034			2	6.20513	2.93854	0.140276	12.27	0.0453
									Error	24	2830.33	117.931					3	9.84615	3.493	2.63696	17.0554	0.0095
									Line	1	3058.62	3058.61	45.9668	<.0001			4	7.94872	3.71637	0.278512	15.6189	0.0428
									Error	24	1596.95	66.54					5	1.80769	5.81196	-10.1876	13.803	0.7585
									Line	1	944.017	944.017	26.282	<.0001			6	-9.62821	3.76719	-17.4033	-1.85311	0.0173
									Error	24	862.051	35.919					7	-5.87179	2.25156	-10.5188	-1.22481	0.0154
									Line	1	239.027	239.027	10.3347	0.0037			8	-0.025641	0.025641	-0.078561	0.0272794	0.3273
									Error	24	555.085	23.129				sra	1	1.28205	1.79926	-2.43144	4.99555	0.483
									Line	1	47.1154	47.1154	3.7784	0.0637			2	7.74359	3.10393	1.3374	14.1498	0.0199
									Error	24	299.269	12.4696					3	12.8077	2.91356	6.7944	18.821	0.0002
									Line	1	0.240385	0.240385	1	0.3273			4	3.89744	4.3155	-5.00931	12.8042	0.3754
									Error	24	5.76923	0.240385					5	-3.48718	4.95458	-13.7129	6.73856	0.4883
								DAAM	Line	1	404.087	404.087	17.5638	0.0003			6	-6.34615	3.80686	-14.2031	1.51081	0.1085
									Error	24	552.162	23.007					7	-4.76923	2.35345	-9.6265	0.088043	0.054
									Line	1	210.615	210.615	2.7785	0.1085			8	-0.025641	0.025641	-0.078561	0.0272794	0.3273
									Error	24	1819.22	75.801				TRAM	1	-2.87179	1.72575	-6.43356	0.689967	0.1091
									Line	1	56.0267	56.0267	0.6823	0.4169			2	-3.14103	3.40666	-10.172	3.88997	0.3657
									Error	24	1970.88	82.12					3	2.69231	3.68786	-4.91906	10.3037	0.4724
									Line	1	300.107	300.107	2.1755	0.1532			4	0.589744	2.89367	-5.38251	6.562	0.8402
									Error	24	3310.79	137.949					5	-2.83333	1.7265	-6.39665	0.729984	0.1138
									Line	1	501.309	501.309	6.1478	0.0206			6	-2.70513	1.76925	-6.35669	0.946433	0.1393
									Error	24	1957.04	81.543					7	-0.576923	0.642626	-1.90324	0.749392	0.3782
									Line	1	124.232	124.232	3.4246	0.0766			8	0.307692	0.353553	-0.422006	1.03739	0.3928
									Error	24	870.632	36.276				wds	1	-5.92308	3.39552	-12.9311	1.08494	0.0939
									Line	1	1.7094	1.7094	1.748	0.1986			2	-12.2051	2.87829	-18.1456	-6.26462	0.0003
									Error	24	23.4701	0.97792					3	4.20513	2.98541	-1.95645	10.3667	0.1718
								dnc	Line	1	1.23504	1.23504	0.0656	0.8001			4	7.17949	2.34673	2.33608	12.0229	0.0054
									Error	24	451.949	18.8312					5	5.30769	2.19789	0.771478	9.84391	0.0237
									Line	1	206.838	206.838	2.3388	0.1393			6	1.97436	2.12519	-2.41182	6.36054	0.3621
									Error	24	2122.54	88.439					7	1.23077	0.947331	-0.724426	3.18596	0.2062
									Line	1	163.334	163.334	1.4136	0.2461		zf30c	1	4.97436	1.46322	1.95441	7.99431	0.0024
									Error	24	2773.14	115.548					2	5.71795	2.7824	-0.024634	11.4605	0.0509
									Line	1	147.846	147.846	1.393	0.2495			3	18.0128	3.20228	11.4036	24.622	<.0001
									Error	24	2547.32	106.139					4	4.9359	3.13414	-1.53264	11.4044	0.1284
									Line	1	209.668	209.668	1.2446	0.2756			5	4.07692	2.47185	-1.02472	9.17857	0.1121
									Error	24	4043.08	168.462					6	3.23077	2.72473	-2.39279	8.85433	0.2473
									Line	1	94.2404	94.2404	0.7996	0.3801			7	1.02564	0.988926	-1.0154	3.06668	0.31
									Error	24	2828.71	117.863					8	1.30769	0.849208	-0.444986	3.06037	0.1367
									Line	1	10.0523	10.0524	0.1094	0.7437			9	0.230769	0.230769	-0.245515	0.707054	0.3273
									Error	24	2205.92	91.9133
									Line	1	32.719	32.719	1.2637	0.2721
									Error	24	621.41	25.8921
								Dredd	Line	1	264.962	264.962	3.4516	0.0755
									Error	24	1842.36	76.765
									Line	1	876.962	876.962	10.4458	0.0036
									Error	24	2014.89	83.954
									Line	1	578.735	578.735	6.7601	0.0157
									Error	24	2054.65	85.61
									Line	1	92.3461	92.3461	2.6856	0.1143
									Error	24	825.248	34.3853
									Line	1	208.722	208.722	9.8255	0.0045
									Error	24	509.829	21.243
									Line	1	65.7094	65.7094	3.5144	0.0731
									Error	24	448.735	18.6973
									Line	1	2.26068	2.26068	1.3687	0.2535
									Error	24	39.641	1.65171
								dx	Line	1	231.01	231.01	10.7448	0.0032
									Error	24	515.991	21.5
									Line	1	227.052	227.052	2.7656	0.1093
									Error	24	1970.37	82.099
									Line	1	160.838	160.838	1.7649	0.1965
									Error	24	2187.16	91.132
									Line	1	0.240384	0.240384	0.0016	0.9681
									Error	24	3521.99	146.75
									Line	1	3.59402	3.59402	0.1137	0.7389
									Error	24	758.838	31.6182
									Line	1	0.068376	0.068376	0.0043	0.948
									Error	24	377.761	15.74
								egh	Line	1	74.4615	74.4615	2.5488	0.1235
									Error	24	701.145	29.2144
									Line	1	325.538	325.538	10.8176	0.0031
									Error	24	722.244	30.093
									Line	1	242.068	242.068	1.9042	0.1803
									Error	24	3051.03	127.126
									Line	1	3.47115	3.47115	0.0197	0.8896
									Error	24	4229.05	176.21
									Line	1	1.79594	1.79594	0.0139	0.907
									Error	24	3091.82	128.826
									Line	1	56.0267	56.0267	1.5178	0.2299
									Error	24	885.927	36.9136
									Line	1	60.0096	60.0096	7.0792	0.0137
									Error	24	203.444	8.4769
									Line	1	0.273504	0.273504	3.4595	0.0752
									Error	24	1.89744	0.07906
								Eip75B	Line	1	956.107	956.107	22.352	<.0001
									Error	24	1026.6	42.775
									Line	1	170.94	170.94	1.5921	0.2192
									Error	24	2576.88	107.37
									Line	1	35.0011	35.0011	0.3444	0.5628
									Error	24	2438.94	101.623
									Line	1	339.846	339.846	2.0772	0.1624
									Error	24	3926.6	163.608
									Line	1	942.01	942.01	6.0934	0.0211
									Error	24	3710.29	154.596
									Line	1	610.615	610.615	7.4197	0.0118
									Error	24	1975.12	82.297
									Line	1	109.402	109.402	2.8274	0.1056
									Error	24	928.65	38.694
									Line	1	0.0042735	0.0042735	1	0.3273
									Error	24	0.102564	0.004273
									Line	1	0.00961538	0.0096154	1	0.3273
									Error	24	0.230769	0.009615
								Fdx1	Line	1	46.2222	46.2222	2.7621	0.1095
									Error	24	401.624	16.7343
									Line	1	3.59402	3.59402	0.0626	0.8046
									Error	24	1378.02	57.4174
									Line	1	259.668	259.668	5.6495	0.0258
									Error	24	1103.11	45.963
									Line	1	52.6538	52.6538	0.828	0.3719
									Error	24	1526.22	63.5926
									Line	1	80.7959	80.7959	7.3433	0.0122
									Error	24	264.064	11.0027
									Line	1	140.004	140.004	11.2974	0.0026
									Error	24	297.423	12.393
									Line	1	7.53846	7.53846	3.7363	0.0651
									Error	24	48.4231	2.01763
									Line	1	0.0384615	0.0384615	1	0.3273
									Error	24	0.923077	0.038462
								fs(1)N	Line	1	483.899	483.899	24.757	<.0001
									Error	24	469.103	19.546
									Line	1	458.36	458.36	6.6731	0.0163
									Error	24	1648.5	68.688
									Line	1	105.338	105.338	0.8868	0.3557
									Error	24	2850.92	118.788
									Line	1	14.625	14.625	0.0855	0.7725
									Error	24	4106.11	171.088
									Line	1	218.274	218.274	3.688	0.0668
									Error	24	1420.44	59.185
									Line	1	1.23504	1.23504	0.0885	0.7686
									Error	24	334.752	13.948
									Line	1	5.23504	5.23504	2.1882	0.1521
									Error	24	57.4188	2.39245
									Line	1	0.517094	0.517094	1.7536	0.1979
									Error	24	7.07692	0.294872
								G9a	Line	1	331.463	331.463	18.4925	0.0002
									Error	24	430.179	17.924
									Line	1	3.00107	3.00107	0.0466	0.831
									Error	24	1546.45	64.4355
									Line	1	9.84615	9.84615	0.0962	0.7591
									Error	24	2455.88	102.328
									Line	1	5.69338	5.69337	0.0374	0.8482
									Error	24	3649.75	152.073
									Line	1	18.0556	18.0556	0.3877	0.5394
									Error	24	1117.62	46.5677
									Line	1	24.0385	24.0385	0.7448	0.3967
									Error	24	774.632	32.2764
									Line	1	8.2735	8.27351	2.1765	0.1531
									Error	24	91.2308	3.80128
									Line	1	0.517094	0.517094	2.1607	0.1546
									Error	24	5.74359	0.239316
								Hsl	Line	1	422.693	422.693	16.0902	0.0005
									Error	24	630.487	26.27
									Line	1	296.719	296.719	5.1535	0.0325
									Error	24	1381.84	57.577
									Line	1	2.67094	2.67094	0.0324	0.8587
									Error	24	1978.26	82.4274
									Line	1	55.0523	55.0523	0.4771	0.4964
									Error	24	2769.26	115.386
									Line	1	28.735	28.735	0.6703	0.421
									Error	24	1028.8	42.8668
									Line	1	3.11538	3.11538	0.1377	0.7139
									Error	24	543.094	22.6289
									Line	1	4.37607	4.37607	2.0317	0.1669
									Error	24	51.6923	2.15385
								Hsp22	Line	1	218.273	218.274	9.4343	0.0052
									Error	24	555.265	23.136
									Line	1	170.94	170.94	1.1184	0.3008
									Error	24	3668.19	152.841
									Line	1	42.3088	42.3088	0.4504	0.5085
									Error	24	2254.41	93.9338
									Line	1	121.334	121.334	0.5242	0.4761
									Error	24	5555.38	231.474
									Line	1	163.334	163.334	1.0547	0.3147
									Error	24	3716.7	154.862
									Line	1	70.0171	70.0171	2.2544	0.1463
									Error	24	745.376	31.0573
									Line	1	57.0096	57.0096	6.8797	0.0149
									Error	24	198.88	8.2867
									Line	1	0.209402	0.209402	2.5128	0.126
									Error	24	2	0.083333
								Klp67A	Line	1	409.36	409.36	19.2643	0.0002
									Error	24	509.991	21.25
									Line	1	45.7788	45.7788	0.753	0.3941
									Error	24	1459.07	60.7945
									Line	1	5.85043	5.85043	0.0581	0.8115
									Error	24	2415.15	100.631
									Line	1	127.163	127.163	1.1513	0.2939
									Error	24	2650.81	110.45
									Line	1	63.6068	63.6068	1.0704	0.3112
									Error	24	1426.22	59.4259
									Line	1	3.59402	3.59402	0.2593	0.6152
									Error	24	332.632	13.8597
								l(1)G0004	Line	1	151.043	151.043	7.611	0.0109
									Error	24	476.291	19.845
									Line	1	111.463	111.463	2.2789	0.1442
									Error	24	1173.87	48.911
									Line	1	47.1154	47.1154	0.7357	0.3995
									Error	24	1537.01	64.042
									Line	1	79.0427	79.0427	2.4706	0.1291
									Error	24	767.85	31.9938
									Line	1	29.7959	29.7959	1.5433	0.2261
									Error	24	463.372	19.3072
									Line	1	72.2222	72.2222	4.4563	0.0454
									Error	24	388.962	16.2067
									Line	1	2.46154	2.46154	0.8245	0.3729
									Error	24	71.6538	2.98558
									Line	1	0.0384615	0.0384615	1	0.3273
									Error	24	0.923077	0.038462
								lama	Line	1	125.693	125.693	6.2667	0.0195
									Error	24	481.376	20.057
									Line	1	215.386	215.386	3.8245	0.0622
									Error	24	1351.62	56.317
									Line	1	123.504	123.504	1.129	0.2986
									Error	24	2625.37	109.39
									Line	1	115.642	115.642	0.8863	0.3559
									Error	24	3131.41	130.475
									Line	1	12.4615	12.4615	0.2877	0.5967
									Error	24	1039.69	43.3205
									Line	1	9.44017	9.44017	0.367	0.5503
									Error	24	617.299	25.7208
									Line	1	6.5	6.5	2.4545	0.1303
									Error	24	63.5556	2.64815
									Line	1	0.0042735	0.0042735	1	0.3273
									Error	24	0.102564	0.004273
								Lztr1	Line	1	12.9273	12.9274	0.7514	0.3946
									Error	24	412.906	17.2044
									Line	1	275.709	275.709	3.6056	0.0697
									Error	24	1835.18	76.466
									Line	1	374.427	374.427	1.987	0.1715
									Error	24	4522.48	188.437
									Line	1	36.1709	36.1709	0.1652	0.688
									Error	24	5254.94	218.956
									Line	1	65.7094	65.7094	0.5126	0.4809
									Error	24	3076.81	128.2
									Line	1	89.8504	89.8504	3.6062	0.0697
									Error	24	597.979	24.9158
									Line	1	5.53846	5.53846	0.278	0.6029
									Error	24	478.197	19.9249
									Line	1	4.24038	4.24038	2.3527	0.1381
									Error	24	43.2564	1.80235
									Line	1	0.0384615	0.0384615	1	0.3273
									Error	24	0.923077	0.038462
								MED22	Line	1	384.615	384.615	8.6909	0.007
									Error	24	1062.12	44.255
									Line	1	0.42735	0.42735	0.0065	0.9362
									Error	24	1566.07	65.253
									Line	1	6.00962	6.00962	0.0741	0.7878
									Error	24	1946.54	81.1059
									Line	1	8.2735	8.2735	0.0664	0.7989
									Error	24	2991.94	124.664
									Line	1	665.087	665.087	3.9801	0.0575
									Error	24	4010.5	167.104
									Line	1	748.471	748.471	9.6504	0.0048
									Error	24	1861.41	77.559
									Line	1	67.3088	67.3088	1.177	0.2888
									Error	24	1372.53	57.1889
									Line	1	0.00106838	0.0010684	0.0769	0.7839
									Error	24	0.333333	0.013889
								msn	Line	1	143.115	143.115	6.9607	0.0144
									Error	24	493.453	20.561
									Line	1	5.69337	5.69337	0.0955	0.7599
									Error	24	1430.26	59.5942
									Line	1	207.779	207.779	3.3996	0.0776
									Error	24	1466.83	61.118
									Line	1	138.462	138.462	1.1269	0.299
									Error	24	2948.97	122.874
									Line	1	245.129	245.129	1.1371	0.2969
									Error	24	5173.92	215.58
									Line	1	302.376	302.376	3.0037	0.0959
									Error	24	2416.02	100.667
									Line	1	115.642	115.642	2.6244	0.1183
									Error	24	1057.53	44.064
									Line	1	0.517094	0.517094	1.3988	0.2485
									Error	24	8.87179	0.369658
								ND-ACP	Line	1	2556.85	2556.85	155.205	<.0001
									Error	24	395.376	16.47
									Line	1	6757.72	6757.72	141.505	<.0001
									Error	24	1146.15	47.76
									Line	1	3385.04	3385.04	53.2641	<.0001
									Error	24	1525.25	63.55
									Line	1	1430.18	1430.18	16.8247	0.0004
									Error	24	2040.11	85
									Line	1	117.761	117.761	5.9593	0.0224
									Error	24	474.256	19.761
									Line	1	13.4017	13.4017	1.0806	0.3089
									Error	24	297.641	12.4017
								Nmd3	Line	1	0.153846	0.153846	0.0063	0.9372
									Error	24	582.342	24.2642
									Line	1	199.385	199.385	1.4247	0.2443
									Error	24	3358.88	139.953
									Line	1	207.779	207.779	1.7604	0.1971
									Error	24	2832.72	118.03
									Line	1	63.6068	63.6068	0.3898	0.5383
									Error	24	3915.94	163.164
									Line	1	35.3889	35.3889	0.2062	0.6539
									Error	24	4119.88	171.662
									Line	1	416	416	4.1	0.0541
									Error	24	2435.15	101.465
									Line	1	123.504	123.504	3.1406	0.0891
									Error	24	943.812	39.325
									Line	1	0.00106838	0.0010684	0.0769	0.7839
									Error	24	0.333333	0.013889
								pcx	Line	1	1.88461	1.88461	0.1513	0.7007
									Error	24	298.889	12.4537
									Line	1	41.0427	41.0427	0.8793	0.3577
									Error	24	1120.22	46.6759
									Line	1	5.69338	5.69338	0.1003	0.7542
									Error	24	1362.09	56.7539
									Line	1	0.961539	0.961539	0.0403	0.8425
									Error	24	571.983	23.8326
									Line	1	1.30876	1.30876	0.0905	0.7661
									Error	24	346.94	14.4558
									Line	1	18.3344	18.3344	0.9631	0.3362
									Error	24	456.863	19.036
									Line	1	2.67094	2.67094	1.14	0.2963
									Error	24	56.2308	2.34295
									Line	1	2.963e-33	2.963e-33	0	1
									Error	24	1.40171	0.058405
									Line	1	1.88462	1.88461	1	0.3273
									Error	24	45.2308	1.88462
								Pgant1	Line	1	0.153846	0.153846	0.0072	0.9333
									Error	24	515.419	21.4758
									Line	1	67.8462	67.8462	2.9536	0.0986
									Error	24	551.303	22.971
									Line	1	112.154	112.154	0.8561	0.364
									Error	24	3144.03	131.001
									Line	1	4.65385	4.65385	0.024	0.8782
									Error	24	4654.94	193.956
									Line	1	21.5427	21.5427	0.2013	0.6577
									Error	24	2568.72	107.03
									Line	1	21.5427	21.5427	0.4394	0.5137
									Error	24	1176.7	49.029
									Line	1	15.6421	15.6421	1.3394	0.2585
									Error	24	280.274	11.6781
									Line	1	0.273504	0.273504	3.4595	0.0752
									Error	24	1.89744	0.07906
								piwi	Line	1	94.8761	94.8761	4.2525	0.0502
									Error	24	535.453	22.3105
									Line	1	405.402	405.402	6.562	0.0171
									Error	24	1482.72	61.78
									Line	1	385.898	385.899	3.7662	0.0641
									Error	24	2459.15	102.465
									Line	1	238.017	238.017	1.797	0.1926
									Error	24	3178.88	132.454
									Line	1	49.8462	49.8462	0.2993	0.5894
									Error	24	3996.84	166.535
									Line	1	189.36	189.36	1.4464	0.2408
									Error	24	3142.08	130.92
									Line	1	88.0011	88.0011	1.7591	0.1972
									Error	24	1200.61	50.0255
									Line	1	0.0042735	0.0042735	1	0.3273
									Error	24	0.102564	0.004273
								pn	Line	1	27.3504	27.3504	2.3155	0.1412
									Error	24	283.487	11.812
									Line	1	259.668	259.668	3.4918	0.0739
									Error	24	1784.75	74.365
									Line	1	7.53846	7.53846	0.0722	0.7904
									Error	24	2504.41	104.35
									Line	1	46.6677	46.6677	0.795	0.3815
									Error	24	1408.89	58.7037
									Line	1	4.10684	4.10684	0.1104	0.7426
									Error	24	892.91	37.2046
									Line	1	95.5139	95.5139	5.6328	0.026
									Error	24	406.962	16.9567
									Line	1	5.53846	5.53846	2.5506	0.1233
									Error	24	52.1154	2.17147
									Line	1	0.0384615	0.0384615	1	0.3273
									Error	24	0.923077	0.038462
								RpL22	Line	1	3780.09	3780.09	277.278	<.0001
									Error	24	327.188	13.63
									Line	1	6757.72	6757.72	141.505	<.0001
									Error	24	1146.15	47.76
									Line	1	3385.04	3385.04	53.2641	<.0001
									Error	24	1525.25	63.55
									Line	1	1430.18	1430.18	16.8247	0.0004
									Error	24	2040.11	85
									Line	1	117.761	117.761	5.9593	0.0224
									Error	24	474.256	19.761
									Line	1	13.4017	13.4017	1.0806	0.3089
									Error	24	297.641	12.4017
								sgg	Line	1	15.9017	15.9017	0.6843	0.4163
									Error	24	557.692	23.2372
									Line	1	2.16346	2.16346	0.0551	0.8163
									Error	24	941.628	39.2345
									Line	1	522.01	522.01	6.95	0.0145
									Error	24	1802.62	75.109
									Line	1	312.693	312.693	2.8064	0.1069
									Error	24	2674.1	111.421
									Line	1	79.625	79.625	0.4807	0.4947
									Error	24	3975.16	165.632
									Line	1	375.693	375.693	3.6214	0.0691
									Error	24	2489.83	103.743
									Line	1	41.0427	41.0427	0.8763	0.3585
									Error	24	1124.06	46.8356
									Line	1	1.02671	1.02671	2.2349	0.148
									Error	24	11.0256	0.4594
								sov	Line	1	405.402	405.402	15.0893	0.0007
									Error	24	644.803	26.867
									Line	1	250.274	250.274	4.459	0.0453
									Error	24	1347.06	56.128
									Line	1	630.154	630.154	7.9458	0.0095
									Error	24	1903.36	79.307
									Line	1	410.684	410.684	4.5746	0.0428
									Error	24	2154.58	89.774
									Line	1	21.2404	21.2404	0.0967	0.7585
									Error	24	5269.5	219.562
									Line	1	602.565	602.565	6.5321	0.0173
									Error	24	2213.91	92.246
									Line	1	224.107	224.107	6.8011	0.0154
									Error	24	790.842	32.952
									Line	1	0.0042735	0.0042735	1	0.3273
									Error	24	0.102564	0.004273
								sra	Line	1	10.6838	10.6838	0.5077	0.483
									Error	24	505.026	21.0427
									Line	1	389.761	389.761	6.2239	0.0199
									Error	24	1502.96	62.623
									Line	1	1066.24	1066.24	19.3239	0.0002
									Error	24	1324.26	55.18
									Line	1	98.735	98.735	0.8156	0.3754
									Error	24	2905.26	121.053
									Line	1	79.0427	79.0427	0.4954	0.4883
									Error	24	3829.46	159.561
									Line	1	261.779	261.779	2.779	0.1085
									Error	24	2260.78	94.199
									Line	1	147.846	147.846	4.1067	0.054
									Error	24	864.038	36.002
									Line	1	0.0042735	0.0042735	1	0.3273
									Error	24	0.102564	0.004273
								TRAM	Line	1	53.6068	53.6068	2.7692	0.1091
									Error	24	464.598	19.3583
									Line	1	64.1293	64.1293	0.8501	0.3657
									Error	24	1810.43	75.4345
									Line	1	47.1154	47.1154	0.533	0.4724
									Error	24	2121.65	88.4021
									Line	1	2.26068	2.26068	0.0415	0.8402
									Error	24	1306.24	54.4268
									Line	1	52.1806	52.1805	2.6932	0.1138
									Error	24	465.004	19.3752
									Line	1	47.5652	47.5652	2.3377	0.1393
									Error	24	488.321	20.3467
									Line	1	2.16346	2.16346	0.806	0.3782
									Error	24	64.4231	2.68429
									Line	1	0.615385	0.615385	0.7574	0.3928
									Error	24	19.5	0.8125
								wds	Line	1	228.038	228.038	3.0429	0.0939
									Error	24	1798.62	74.942
									Line	1	968.274	968.274	17.981	0.0003
									Error	24	1292.39	53.85
									Line	1	114.94	114.94	1.984	0.1718
									Error	24	1390.38	57.932
									Line	1	335.043	335.043	9.3597	0.0054
									Error	24	859.111	35.796
									Line	1	183.115	183.115	5.8318	0.0237
									Error	24	753.59	31.4
									Line	1	25.3376	25.3376	0.8631	0.3621
									Error	24	704.564	29.3568
									Line	1	9.84615	9.84615	1.6879	0.2062
									Error	24	140	5.83333
								zf30c	Line	1	160.838	160.838	11.5572	0.0024
									Error	24	334	13.917
									Line	1	212.517	212.517	4.2232	0.0509
									Error	24	1207.71	50.321
									Line	1	2109	2109	31.6406	<.0001
									Error	24	1599.72	66.65
									Line	1	158.36	158.36	2.4803	0.1284
									Error	24	1532.36	63.848
									Line	1	108.038	108.038	2.7203	0.1121
									Error	24	953.167	39.715
									Line	1	67.8462	67.8461	1.4059	0.2473
									Error	24	1158.17	48.2569
									Line	1	6.83761	6.83761	1.0756	0.31
									Error	24	152.564	6.35684
									Line	1	11.1154	11.1154	2.3713	0.1367
									Error	24	112.5	4.6875
									Line	1	0.346154	0.346154	1	0.3273
									Error	24	8.30769	0.346154

[truncated: 5 more sheets: Table S11, Table S12, Table S13, Figure S1, Figure S2]
